# Supplementary material for: Design and total synthesis of unnatural analogues of the sub-nanomolar SERCA inhibitor thapsigargin
Source: Royal Society of Chemistry journal article supplement (doi:10.1039/b702481a), 2007-01-01

# **Design and Total Synthesis of Unnatural Analogues of the Sub-Nanomolar SERCA Inhibitor, Thapsigargin**

Stephen P. Andrews, Malcolm M. Tait, Matthew Ball, and Steven V. Ley\*

**Supplementary Information**

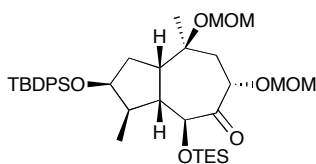

13

**MOM acetal 13:** A solution of hydroxy ketone **12** (605 mg, 944  $\mu\text{mol}$ ) was treated with Hünig's base (1.64 mL, 9.44 mmol), DMAP (11 mg, 94  $\mu\text{mol}$ ) and then MOM-Cl (480  $\mu\text{L}$ , 6.32 mmol) and stirred at room temperature for 16 hours. The reaction was quenched with saturated ammonium chloride solution (50 mL), diluted with  $\text{H}_2\text{O}$  (30 mL) and extracted with  $\text{CH}_2\text{Cl}_2$  (3  $\times$  50 mL). The combined organic phases were washed with brine (100 mL), dried ( $\text{MgSO}_4$ ) and concentrated *in vacuo*. The pale yellow oil was used without further purification, 746 mg;  $\delta_{\text{H}}$  (600 MHz;  $\text{CDCl}_3$ ) 7.67 (4H, m, *o*-Ph), 7.43 (2H, m, *p*-Ph), 7.37 (4H, m, *m*-Ph), 4.72 (1H, d,  $J$  7.4, O-10- $\text{CH}_2\text{O}$ ), 4.66 (1H, d,  $J$  7.4, O-8-10- $\text{CH}_2\text{O}$ ), 4.62 (1H, d,  $J$  6.7, O-8- $\text{CH}_2\text{O}$ ), 4.55-4.52 (2H, m, H-8 and O-8- $\text{CH}_2\text{O}$ ), 4.25 (1H, m, H-3), 4.17 (1H, d,  $J$  7.6, H-6), 3.34 (6H, s, 2  $\times$   $\text{OCH}_3$ ), 2.90 (1H, ddd,  $J$  11.9, 7.8, 7.7, H-1), 2.13 (2H, m, H-4 and H-9), 1.95 (1H, dd,  $J$  13.9, 7.6, H-5), 1.68 (1H, dd,  $J$  14.3, 10.1, H-9'), 1.49 (1H, ddd,  $J$  11.5, 7.2, 1.0, H-2), 1.31 (1H, ddd,  $J$  12.8, 12.6, 5.2, H-2'), 1.14 (3H, d,  $J$  7.1, H-15), 1.12 (3H, s, H-14), 1.08 (9H, s,  $\text{C}(\text{CH}_3)_3$ ), 0.93 (9H, t,  $J$  8.0,  $\text{Si}(\text{CH}_2\text{CH}_3)_3$ ), 0.56 (6H, m,  $\text{Si}(\text{CH}_2)_3$ );  $\delta_{\text{C}}$  (150 MHz;  $\text{CDCl}_3$ ) 207.8 (C-7), 135.83 (*o*-Ph), 135.81 (*o*-Ph), 134.7 (*ipso*-Ph), 133.8 (*ipso*-Ph), 129.59 (*p*-Ph), 129.57 (*p*-Ph), 127.6 (*m*-Ph), 127.5 (*m*-Ph), 95.3 (O-8- $\text{CH}_2\text{O}$ ), 90.7 (O-10- $\text{CH}_2\text{O}$ ), 78.0 (C-10), 76.3 (C-6), 74.8 (C-8), 74.1 (C-3), 55.7 and 55.6 (2  $\times$   $\text{OCH}_3$ ), 51.7 (C-5), 45.9 (C-1), 43.0 (C-4), 37.7 (C-2), 37.6 (C-9), 27.8 (C-14), 27.0 ( $\text{C}(\text{CH}_3)_3$ ), 19.4 ( $\text{C}(\text{CH}_3)_3$ ), 15.3 (C-15), 6.7 ( $\text{Si}(\text{CH}_2\text{CH}_3)_3$ ), 4.6 ( $\text{Si}(\text{CH}_2)_3$ );  $\nu_{\text{max}}$  (film;  $\text{cm}^{-1}$ ) 2955 (C-H), 2933 (C-H), 2879 (C-H), 1727 (C=O), 1590 (Ar), 1541 (Ar);  $[\alpha]_{\text{D}}^{25} +7.70$  (*c.* 1.0,  $\text{CHCl}_3$ ); found (ESI+)  $[\text{MNa}]^+$  707.3803;  $\text{C}_{38}\text{H}_{60}\text{O}_7\text{Si}_2\text{Na}$  requires  $M$ , 707.3775.

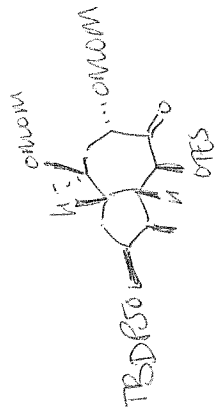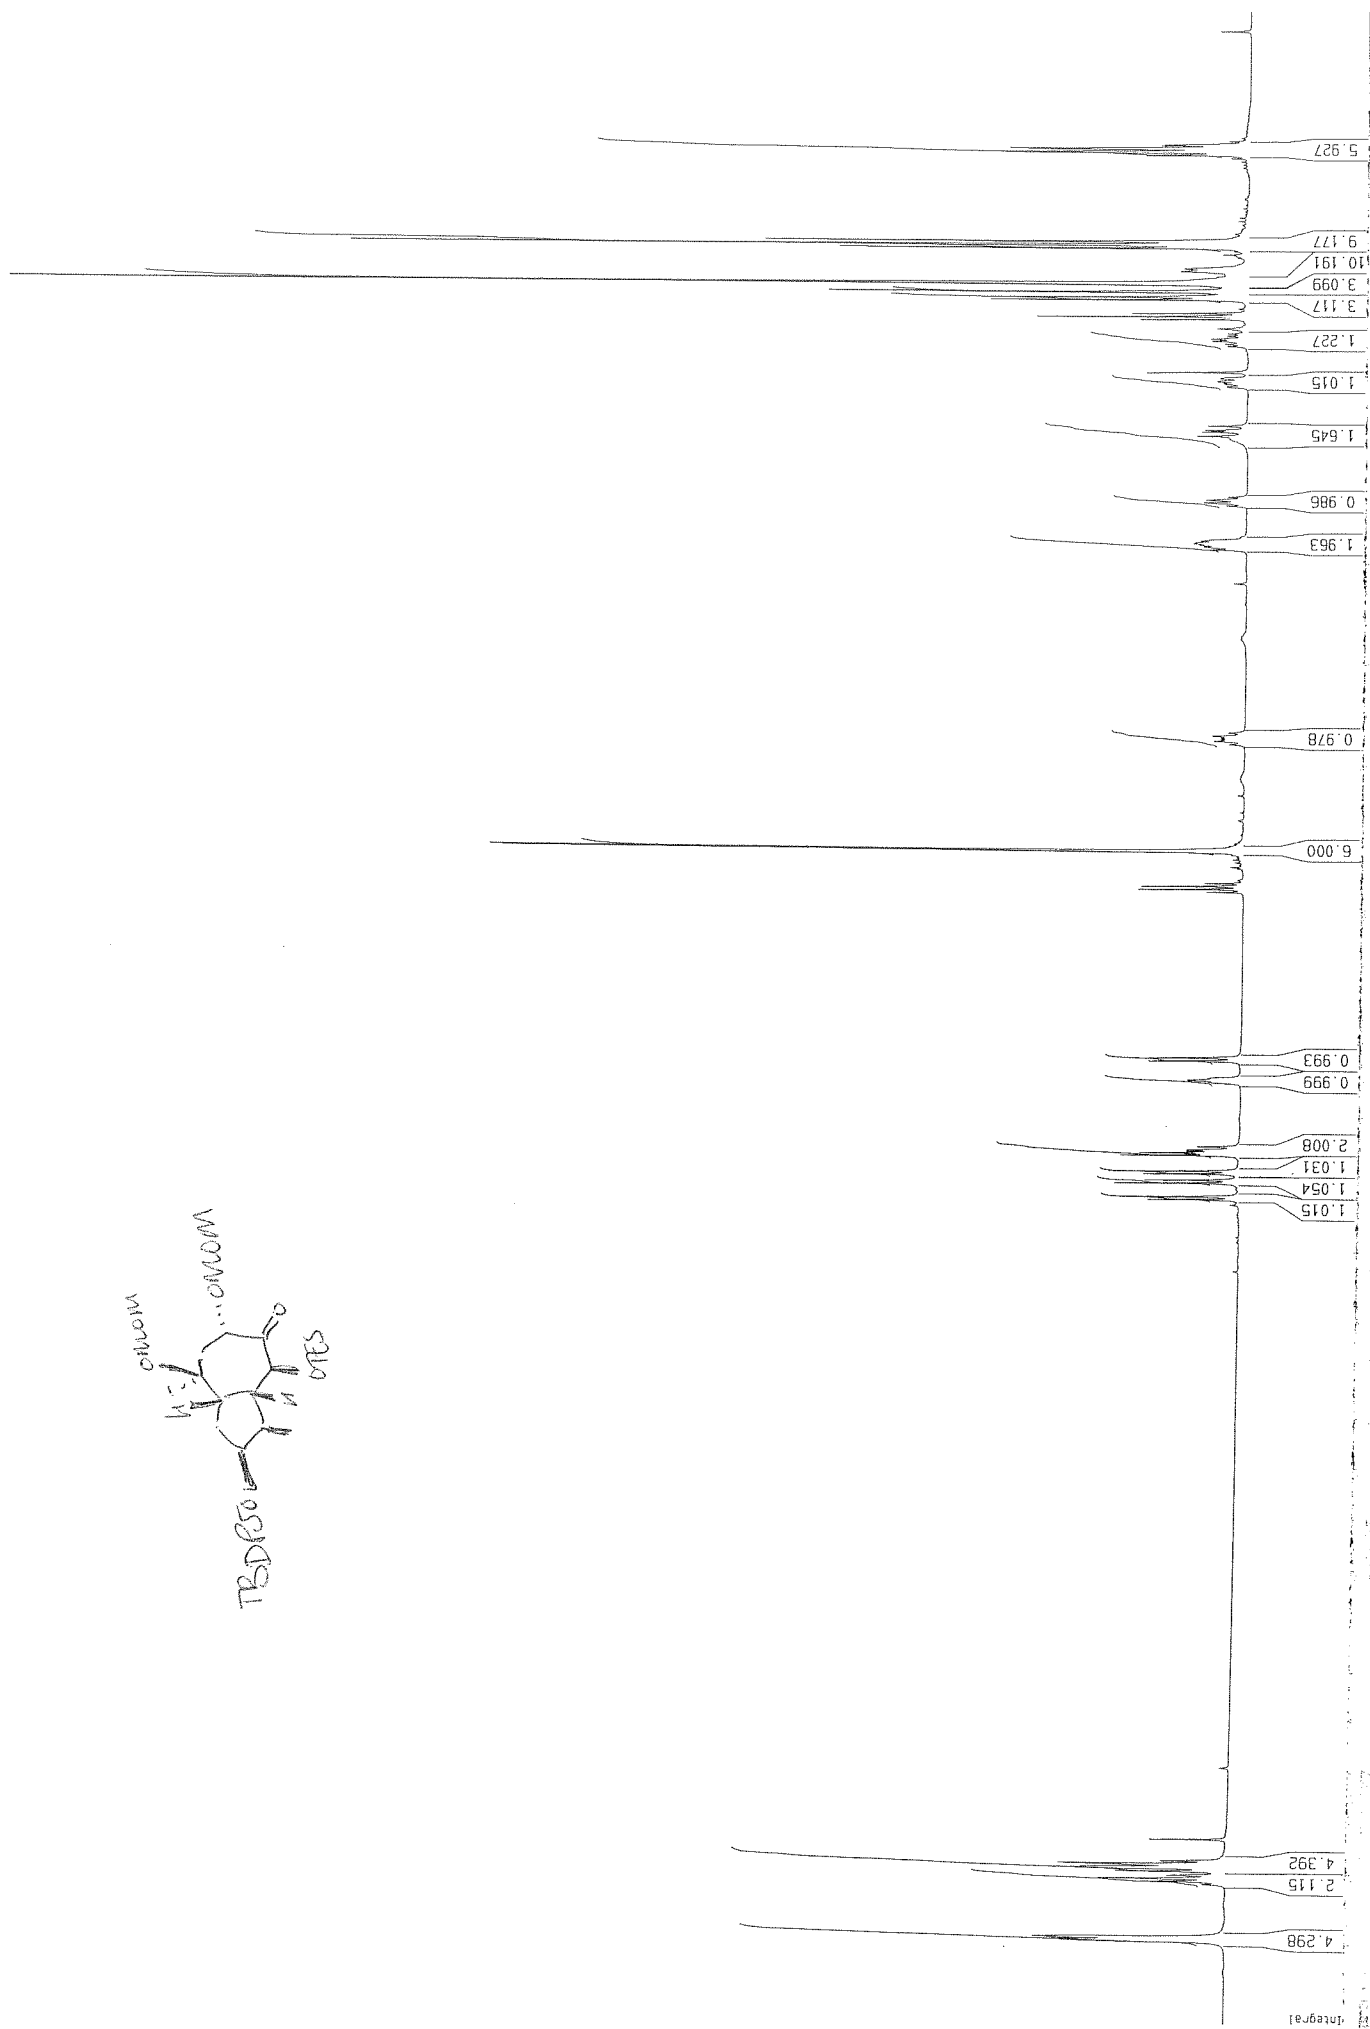

Standart 13C DRX-600  
9a4093

ppm

135.83  
135.81  
134.73  
133.88  
129.59  
129.57  
127.55  
127.51

95.36  
90.74

78.01  
77.21  
76.99  
76.78  
76.32  
74.82  
74.13  
65.82

55.70  
55.60  
51.70  
45.92  
43.04  
37.70  
37.58

27.80  
27.03

15.24  
15.35  
6.74  
4.61

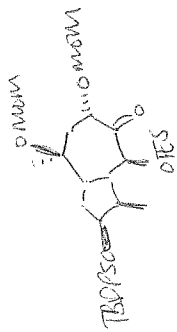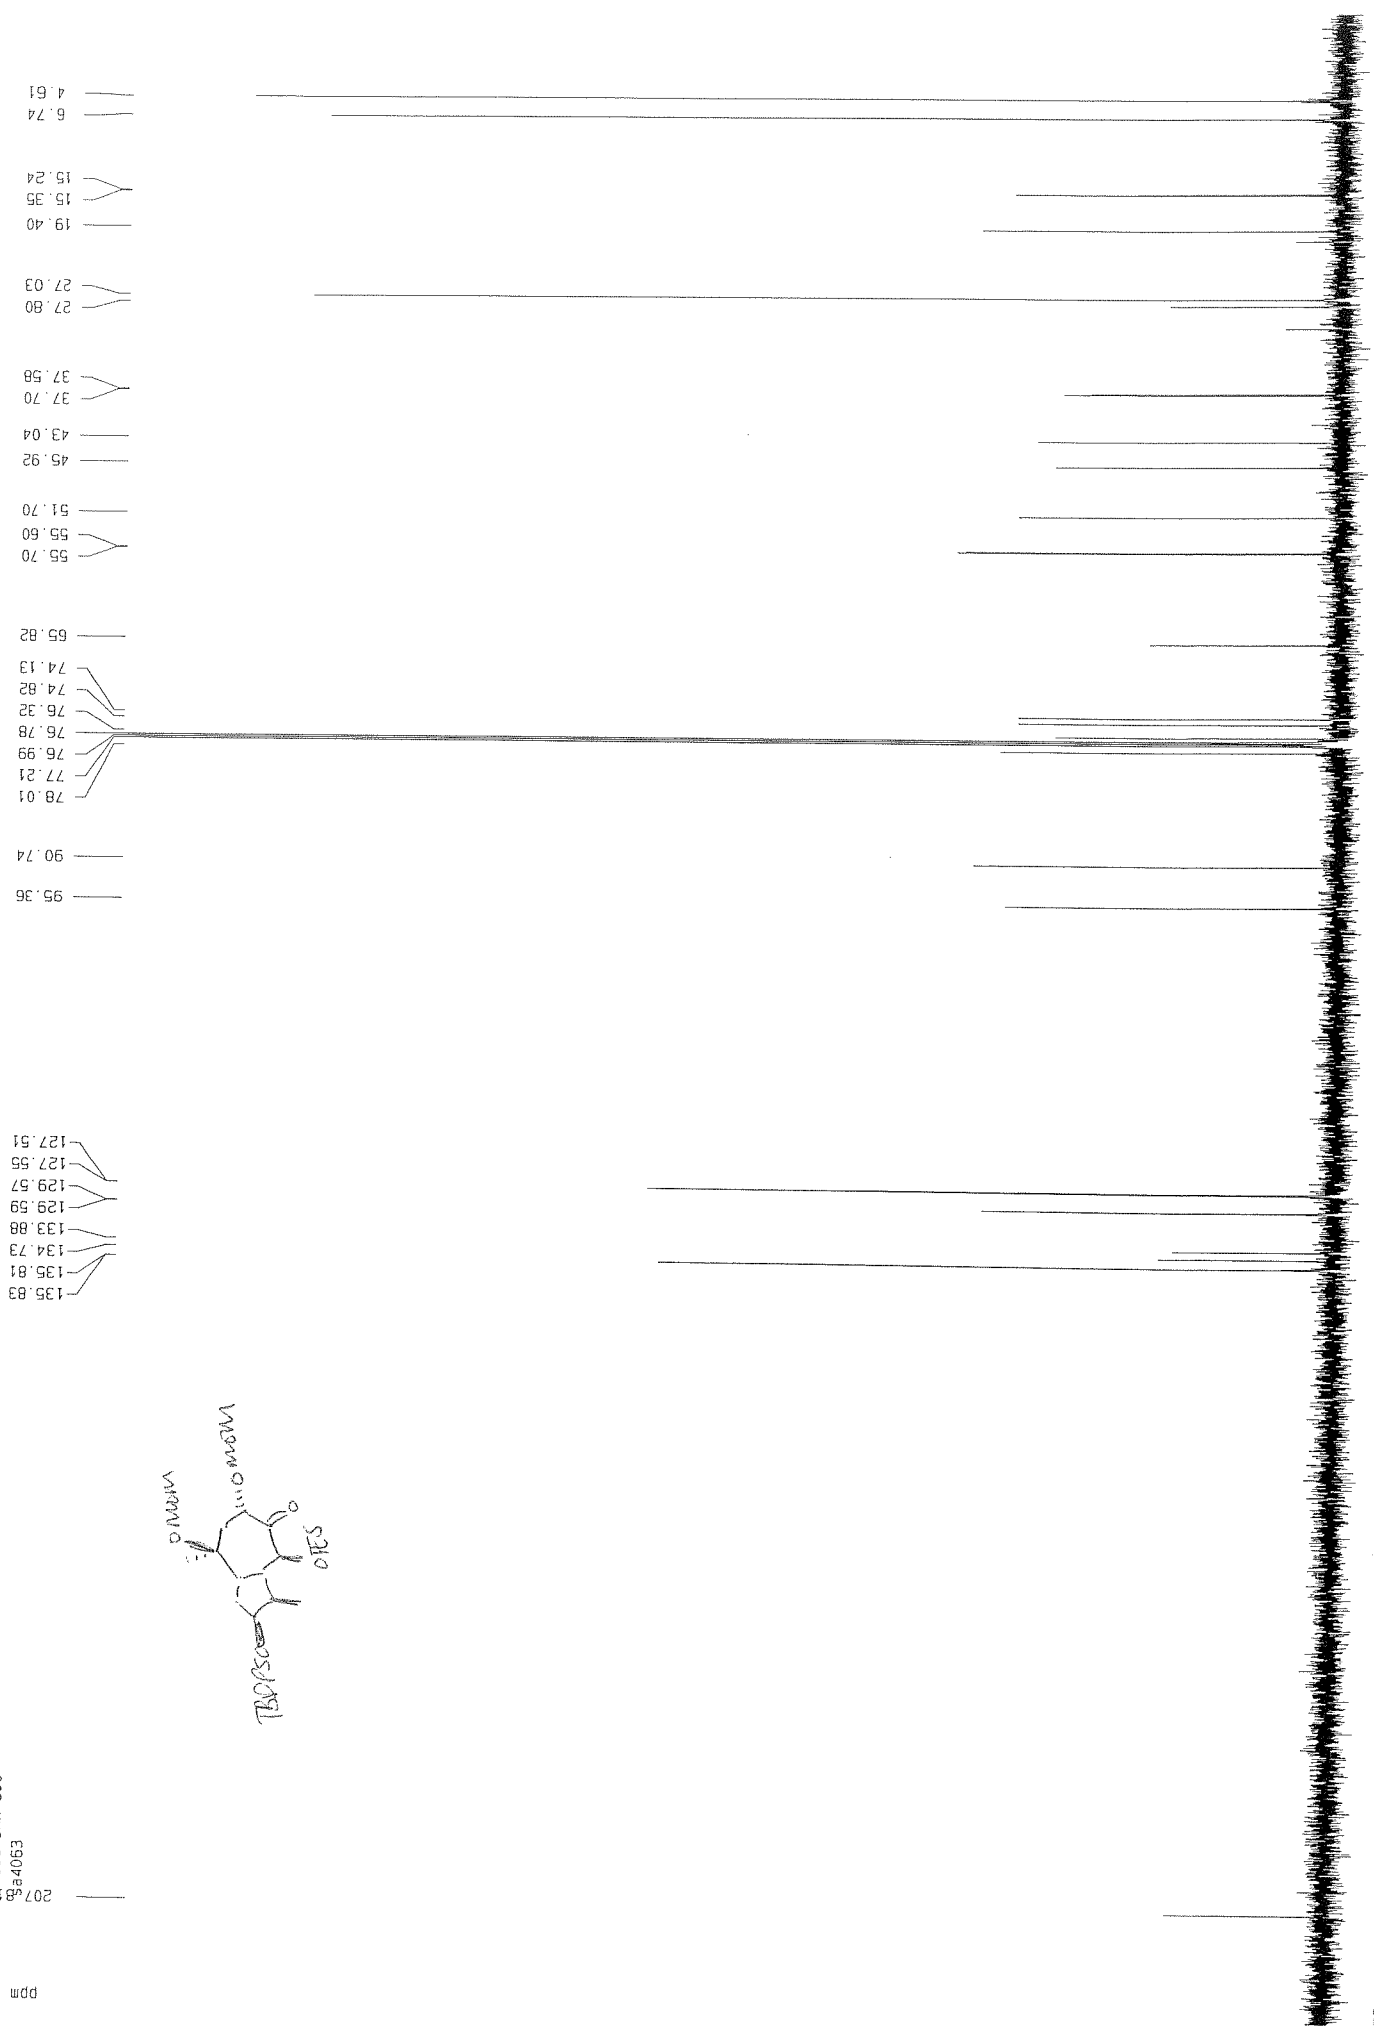

13C NMR spectrum of the compound, showing peaks at various ppm values. The x-axis is labeled 'ppm' and ranges from 0 to 200. The y-axis represents intensity. The spectrum shows several sharp peaks, with the most intense peak at 207.58 ppm. The peaks are labeled with their chemical shift values: 207.58, 135.83, 135.81, 134.73, 133.88, 129.59, 129.57, 127.55, 127.51, 95.36, 90.74, 78.01, 77.21, 76.99, 76.78, 76.32, 74.82, 74.13, 65.82, 55.70, 55.60, 51.70, 45.92, 43.04, 37.70, 37.58, 27.80, 27.03, 15.24, 15.35, 6.74, and 4.61 ppm.

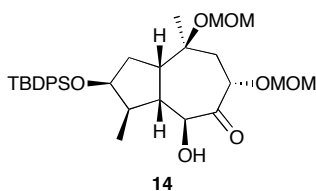

**Alcohol 14:** A stock solution of HF.pyridine (3.5 mL) and pyridine (2.6 mL) in THF (6.0 mL) was added to a stirring solution of crude triethylsilylether **13** (87% by mass from previous step, assume 822  $\mu\text{mol}$ ) in pyridine (6.0 mL) and THF (10 mL). The resulting mixture was stirred at room temperature for 25 minutes then quenched by drop-wise addition of saturated sodium bicarbonate solution (250 mL) and extracted with  $\text{Et}_2\text{O}$  ( $3 \times 100$  mL). The combined organic phases were washed with saturated ammonium chloride solution (100 mL) and brine (100 mL), dried ( $\text{MgSO}_4$ ) and evaporated under reduced pressure. Column chromatography ( $\text{SiO}_2$ ,  $\text{Et}_2\text{O}$ /petrol ether, 1:4 then 2:3) afforded the hydroxy ketone as a colourless oil, 449 mg, 96% over two steps;  $\delta_{\text{H}}$  (600 MHz;  $\text{CDCl}_3$ ) 7.66 (4H, m, *o*-Ph), 7.43 (2H, m, *p*-Ph), 7.37 (4H, m, *m*-Ph), 5.05 (1H, d,  $J$  10.6, OH), 4.98 (1H, dd,  $J$  11.1, 6.5, H-8), 4.86 (2H, s, O-10- $\text{CH}_2\text{O}$ ), 4.62 (1H, d,  $J$  6.9, O-8- $\text{CH}_2\text{O}$ ), 4.59 (1H, d,  $J$  6.9, O-8- $\text{CH}_2\text{O}$ ), 4.19 (1H, m, H-3), 4.03 (1H, dd,  $J$  10.6, 5.0, H-6), 3.47 (3H, s, O-10- $\text{CH}_2\text{OCH}_3$ ), 3.36 (3H, s, O-8- $\text{CH}_2\text{OCH}_3$ ), 2.95 (1H, m, H-1), 2.22 (1H, m, H-5), 2.11 (1H, dd,  $J$  14.4, 6.5, H-9), 1.93 (1H, m, H-4), 1.58 (1H, dd,  $J$  14.4, 11.1, H-9'), 1.39 (1H, dd,  $J$  12.7, 6.6, H-2), 1.15 (3H, s, H-14), 1.13 (3H, d,  $J$  6.8, H-15), 1.09 (9H, s,  $\text{C}(\text{CH}_3)_3$ ), 1.09 (1H, m, H-2');  $\delta_{\text{C}}$  (150 MHz;  $\text{CDCl}_3$ ) 210.6 (C-7), 135.8 (*o*-Ph), 135.7 (*o*-Ph), 134.8 (*ipso*-Ph), 133.7 (*ipso*-Ph), 129.7 (*p*-Ph), 127.6 (*m*-Ph), 127.5 (*m*-Ph), 95.7 (O-8- $\text{CH}_2\text{O}$ ), 91.0 (O-10- $\text{CH}_2\text{O}$ ), 79.9 (C-10), 77.2 (C-6), 74.9 (C-3), 73.5 (C-8), 56.3 (O-10- $\text{CH}_2\text{OCH}_3$ ), 55.7 (O-8- $\text{CH}_2\text{OCH}_3$ ), 49.9 (C-5), 47.6 (C-1), 43.0 (C-4), 38.1 (C-2), 37.3 (C-9), 27.3 (C-14), 27.0 ( $\text{C}(\text{CH}_3)_3$ ), 19.4 ( $\text{C}(\text{CH}_3)_3$ ), 14.5 (C-15);  $\nu_{\text{max}}$  (film;  $\text{cm}^{-1}$ ) 3424 (br OH), 2931 (C-H), 2858 (C-H), 1721 (C=O), 1590 (w Ar);  $[\alpha]_{\text{D}} +19.0$  (c. 0.675,  $\text{CHCl}_3$ ); found (ESI+)  $[\text{MNa}]^+$  593.2919;  $\text{C}_{32}\text{H}_{46}\text{O}_7\text{SiNa}$  requires  $M$ , 593.2911.



210261  
Standard 13C DFx-600

135.88  
135.78  
134.80  
133.71  
129.68  
127.61  
127.54  
125.50

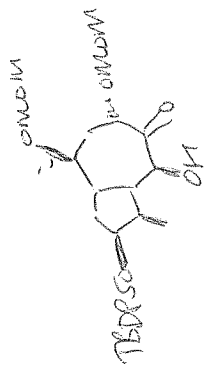

95.79  
91.03  
79.96  
77.76  
77.21  
77.00  
76.79  
74.98  
73.51  
56.34  
55.79  
49.93  
47.86  
43.03  
38.14  
37.37  
30.31  
29.68  
27.32  
27.08  
19.48  
14.51

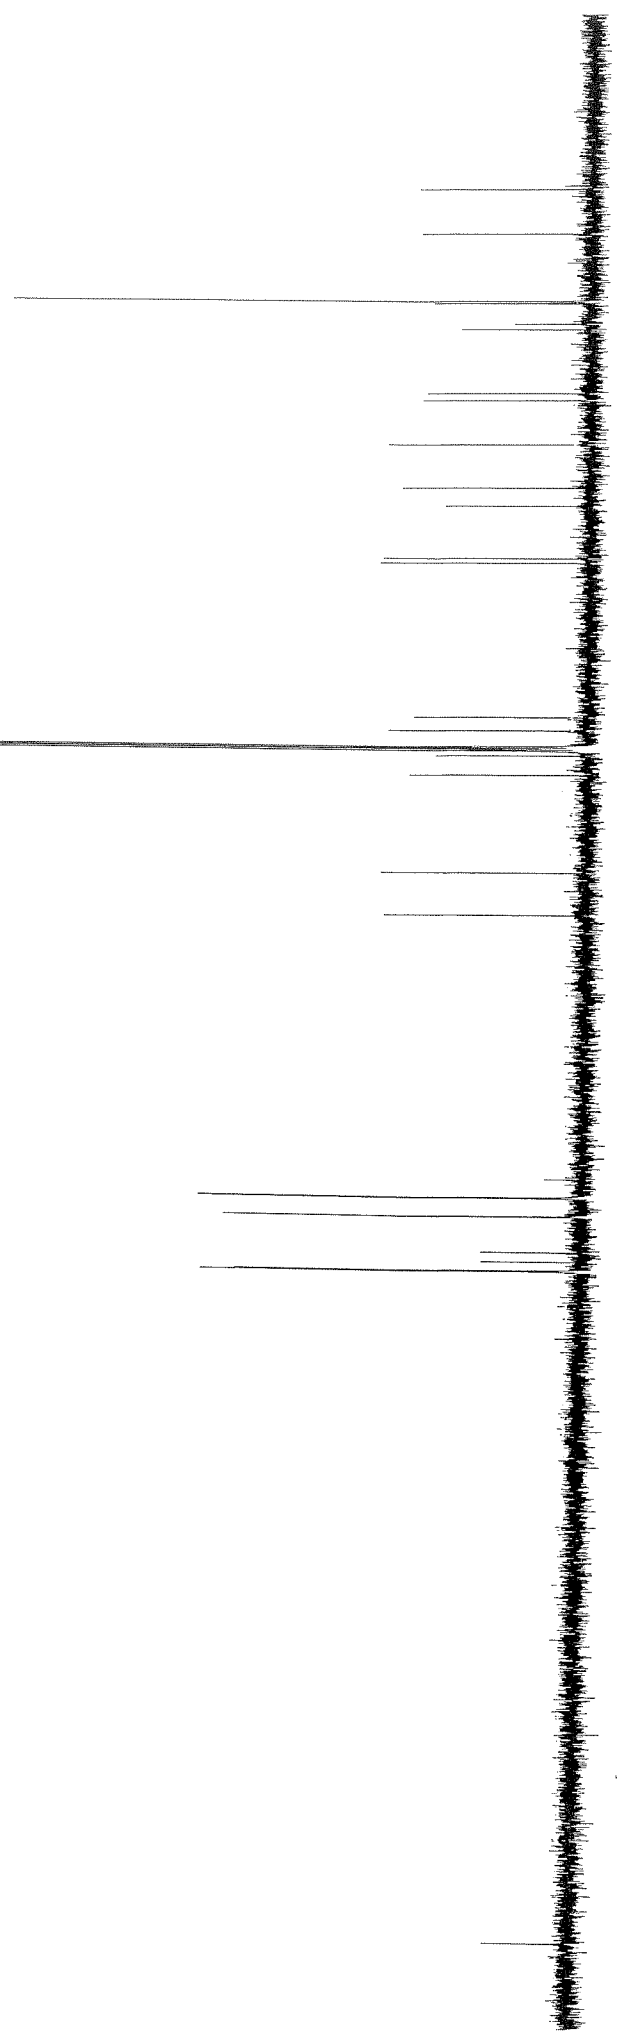

Standard 1H DRX-600  
Sa4069

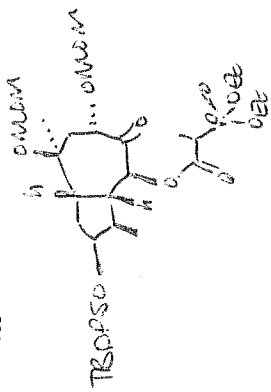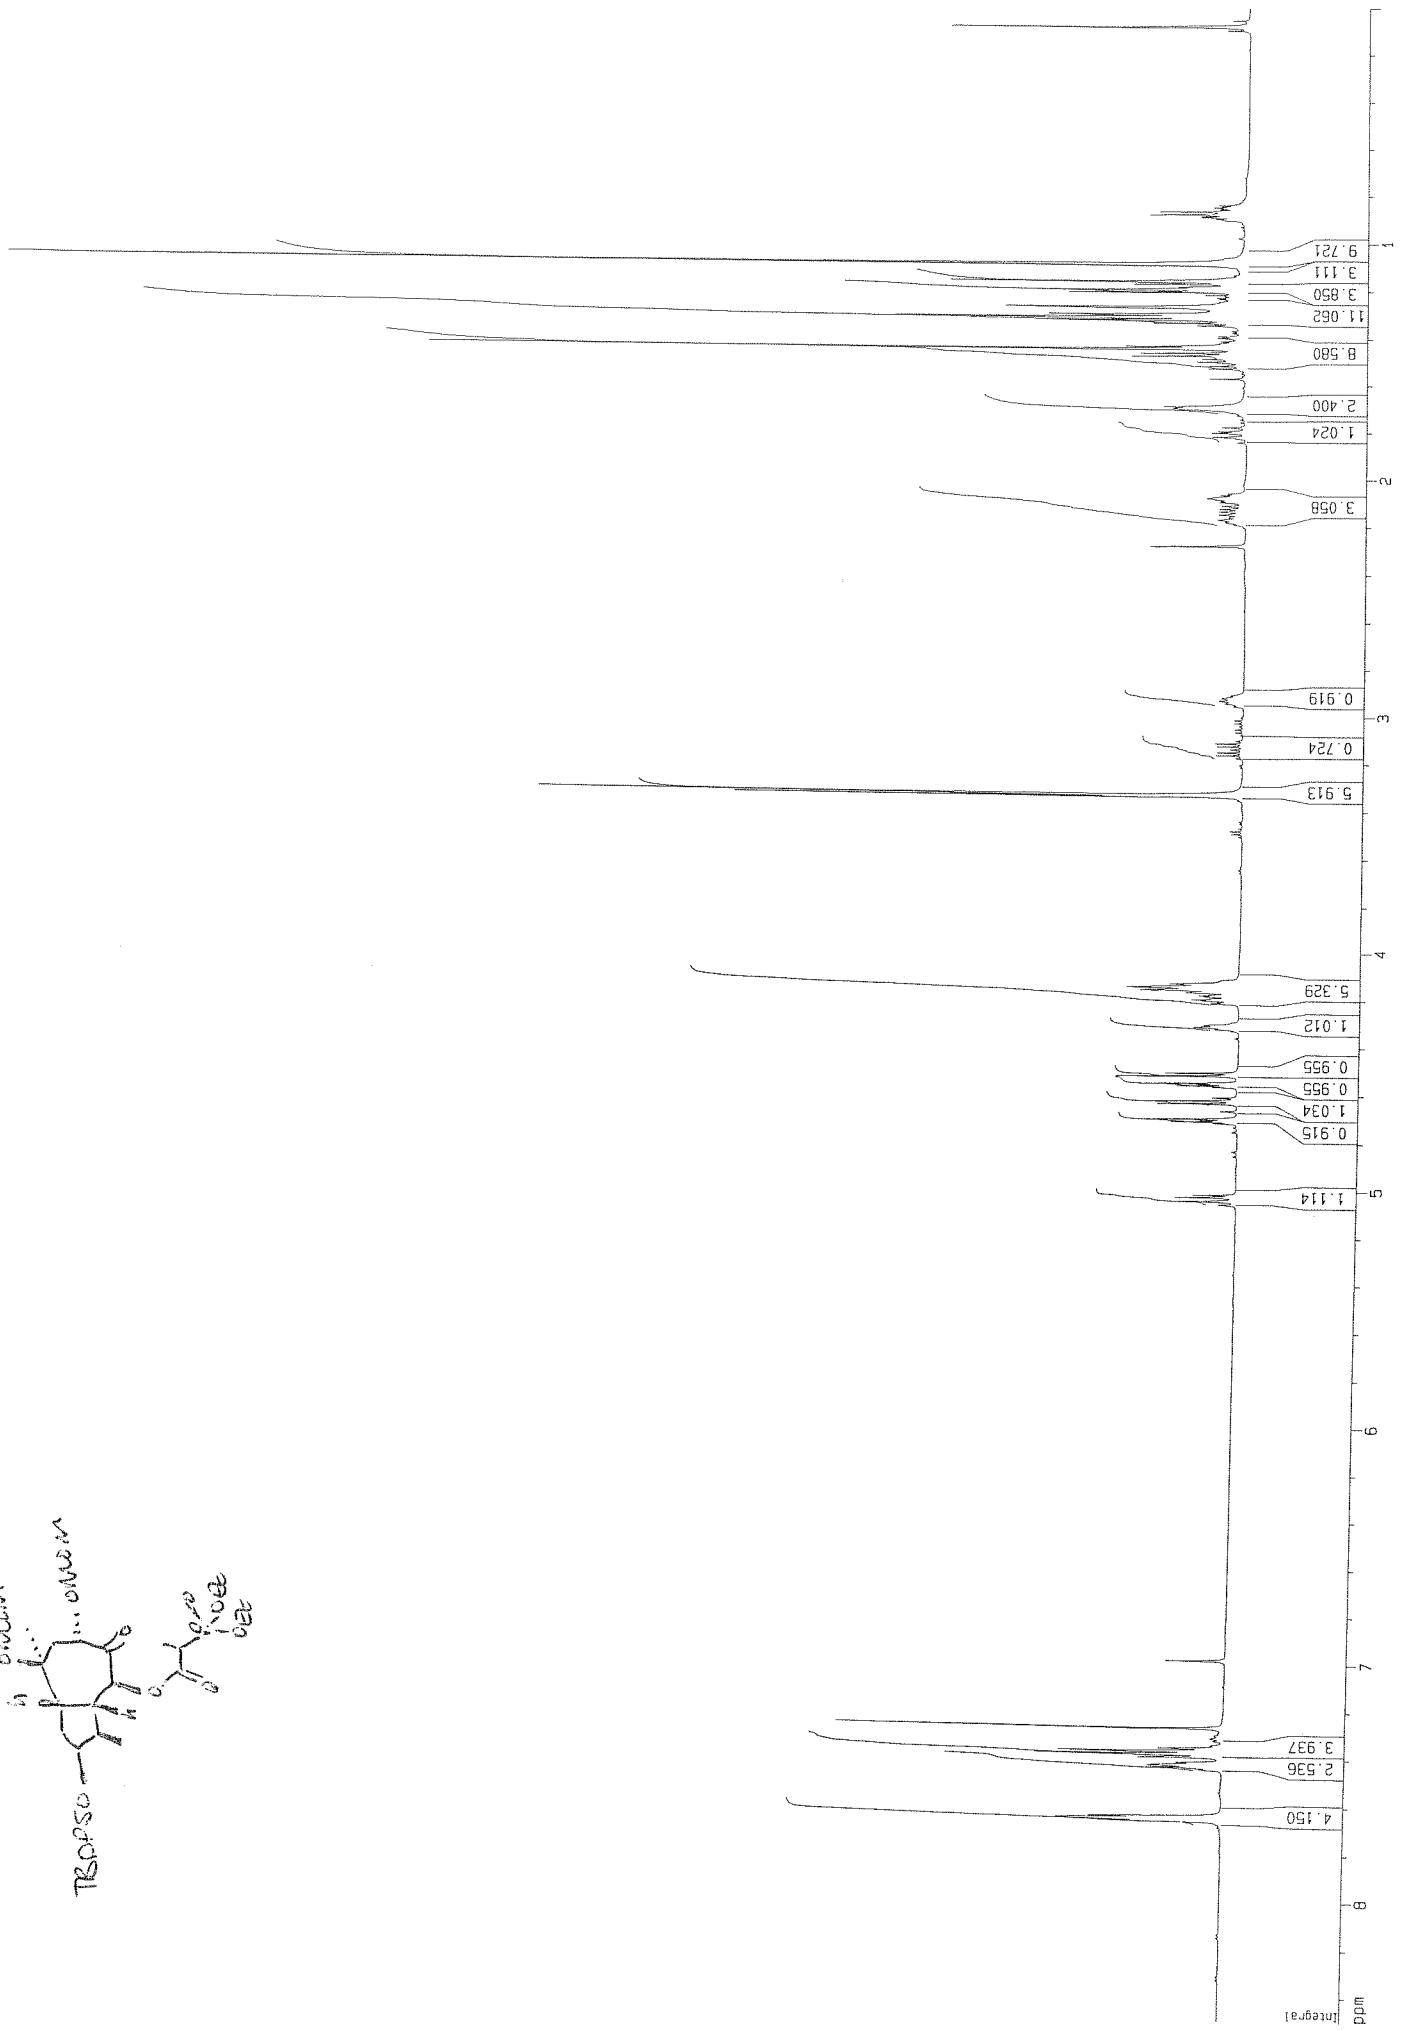



Standard 13C-DBX-600

see 13C-DBX-600

ppm

- 169.16
- 135.84
- 135.79
- 134.62
- 133.66
- 129.68
- 127.61
- 125.49

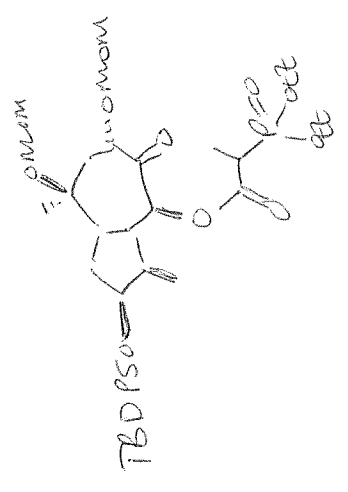

- 94.73
- 94.68
- 90.63
- 90.60
- 78.24
- 77.81
- 77.73
- 77.21
- 76.99
- 76.78
- 74.28
- 73.96
- 73.93
- 73.84
- 62.69
- 62.65
- 55.93
- 55.88
- 55.70
- 47.97
- 47.88
- 46.54
- 46.49
- 44.26
- 39.41
- 38.52
- 37.62
- 37.42
- 36.56
- 34.20
- 30.29
- 29.67
- 27.82
- 27.73
- 27.03
- 19.42
- 16.40
- 16.37
- 16.30
- 15.94
- 15.85
- 11.87
- 11.83
- 11.77
- 0.99

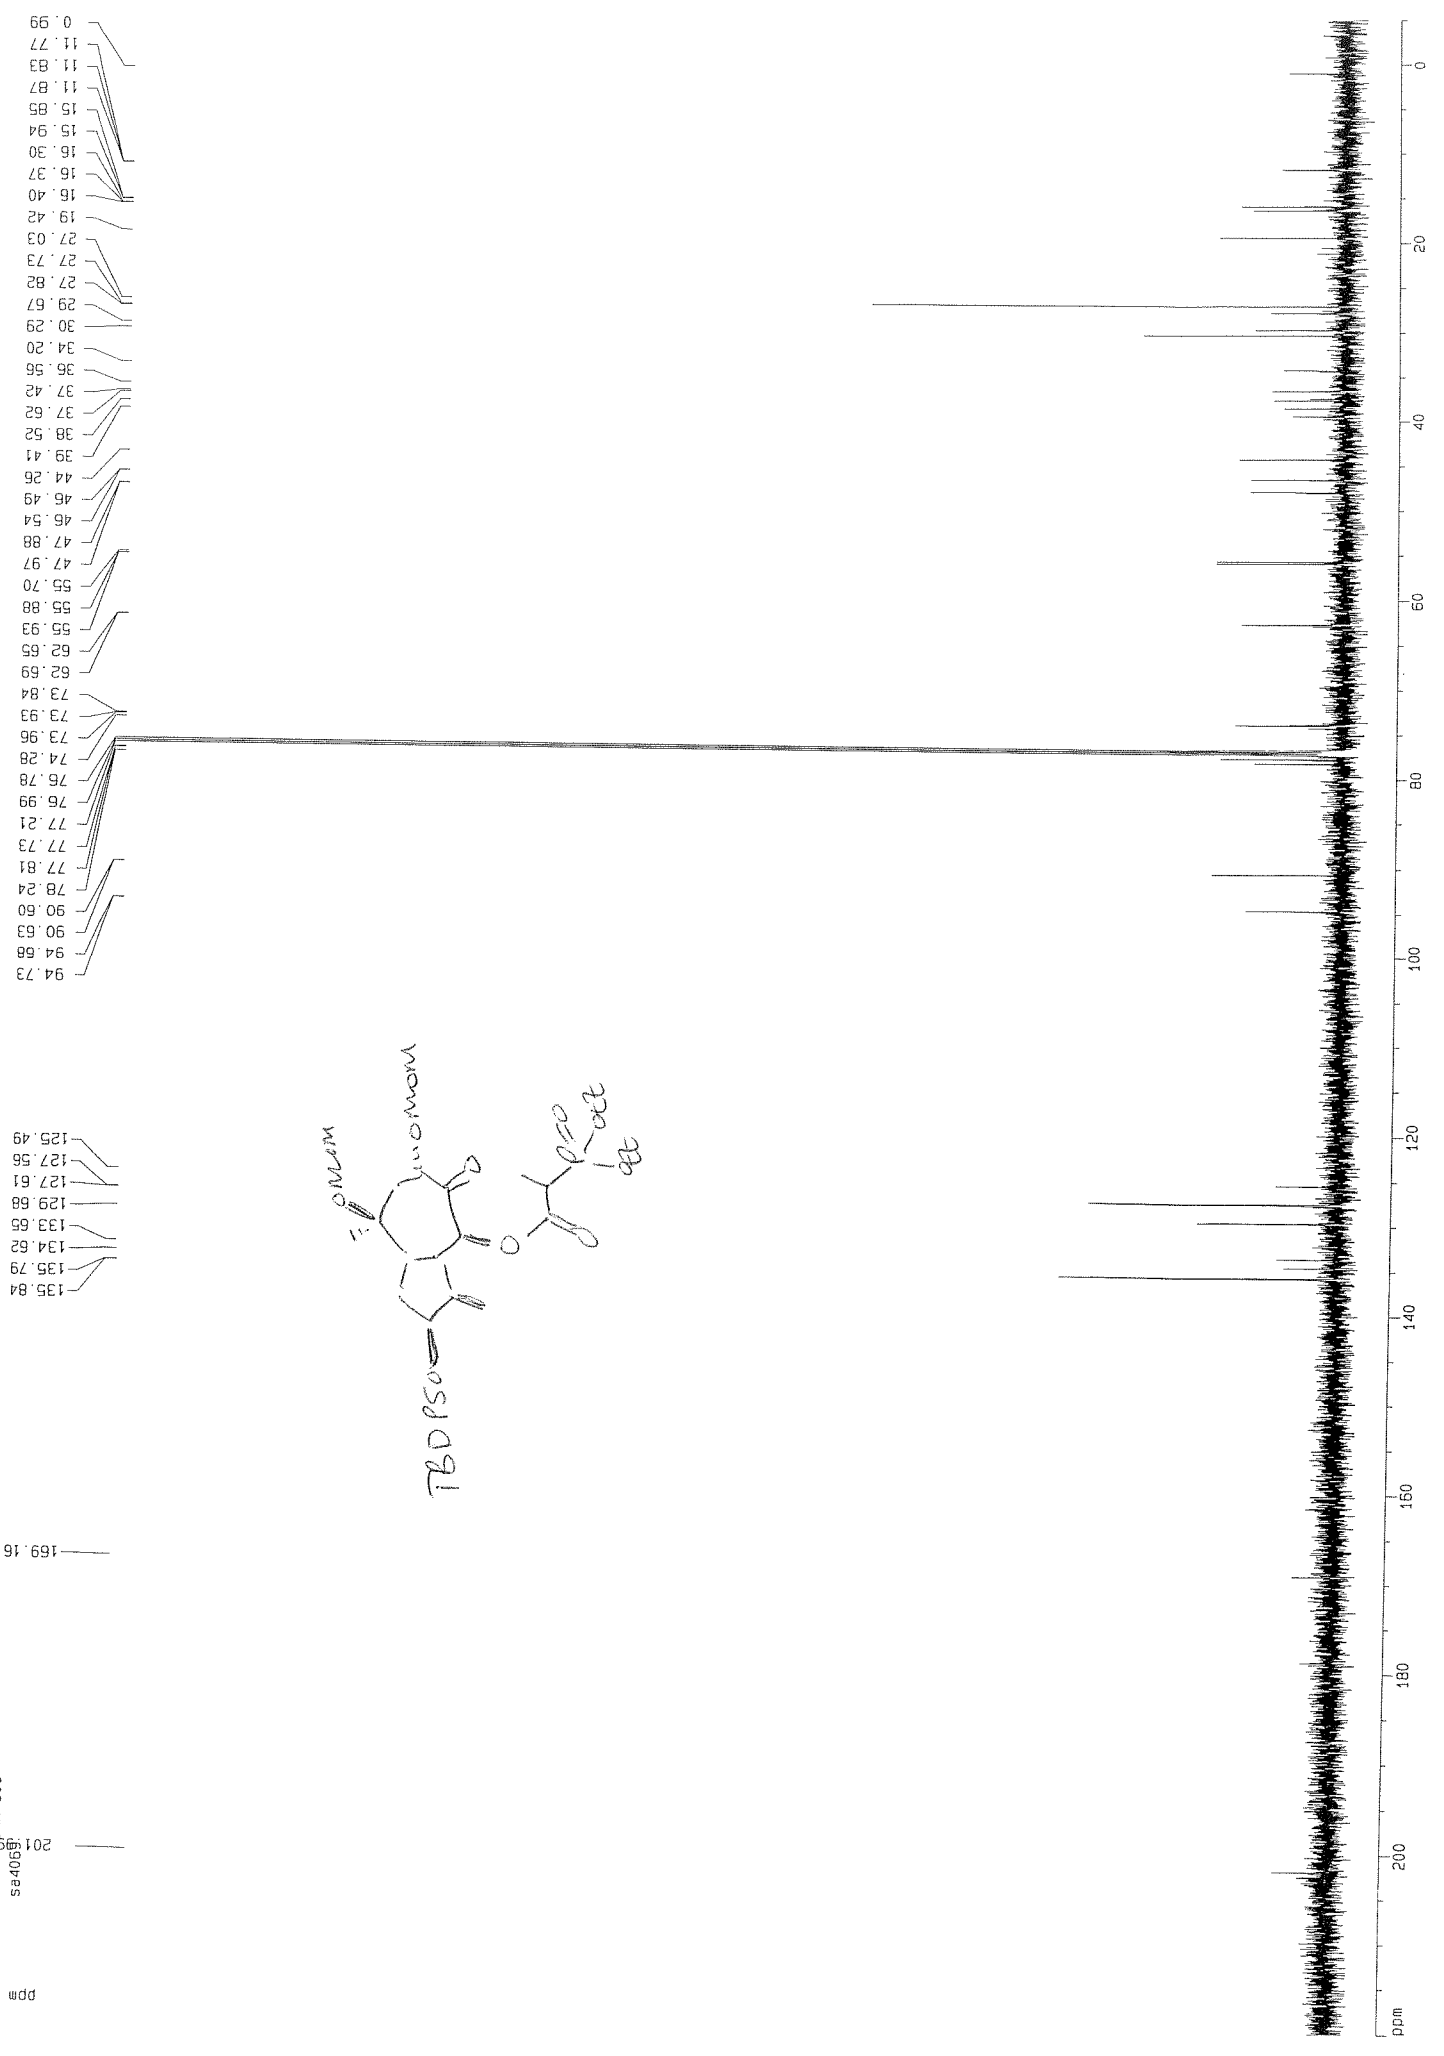



Standard 13C DRX-600

Sa4041

174.28  
161.20  
135.77  
135.76  
134.63  
133.70  
129.72  
129.64  
127.58  
127.56  
126.21

94.79  
90.60  
82.61  
77.33  
77.21  
77.00  
76.79  
73.33  
66.94  
55.83  
55.68  
54.18  
43.71  
43.71  
37.68  
37.11  
30.31  
27.70  
27.00  
19.37  
15.51  
9.05

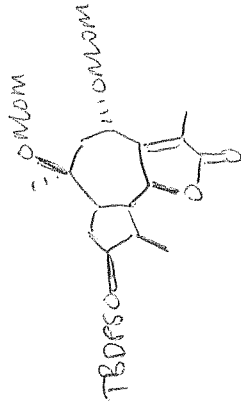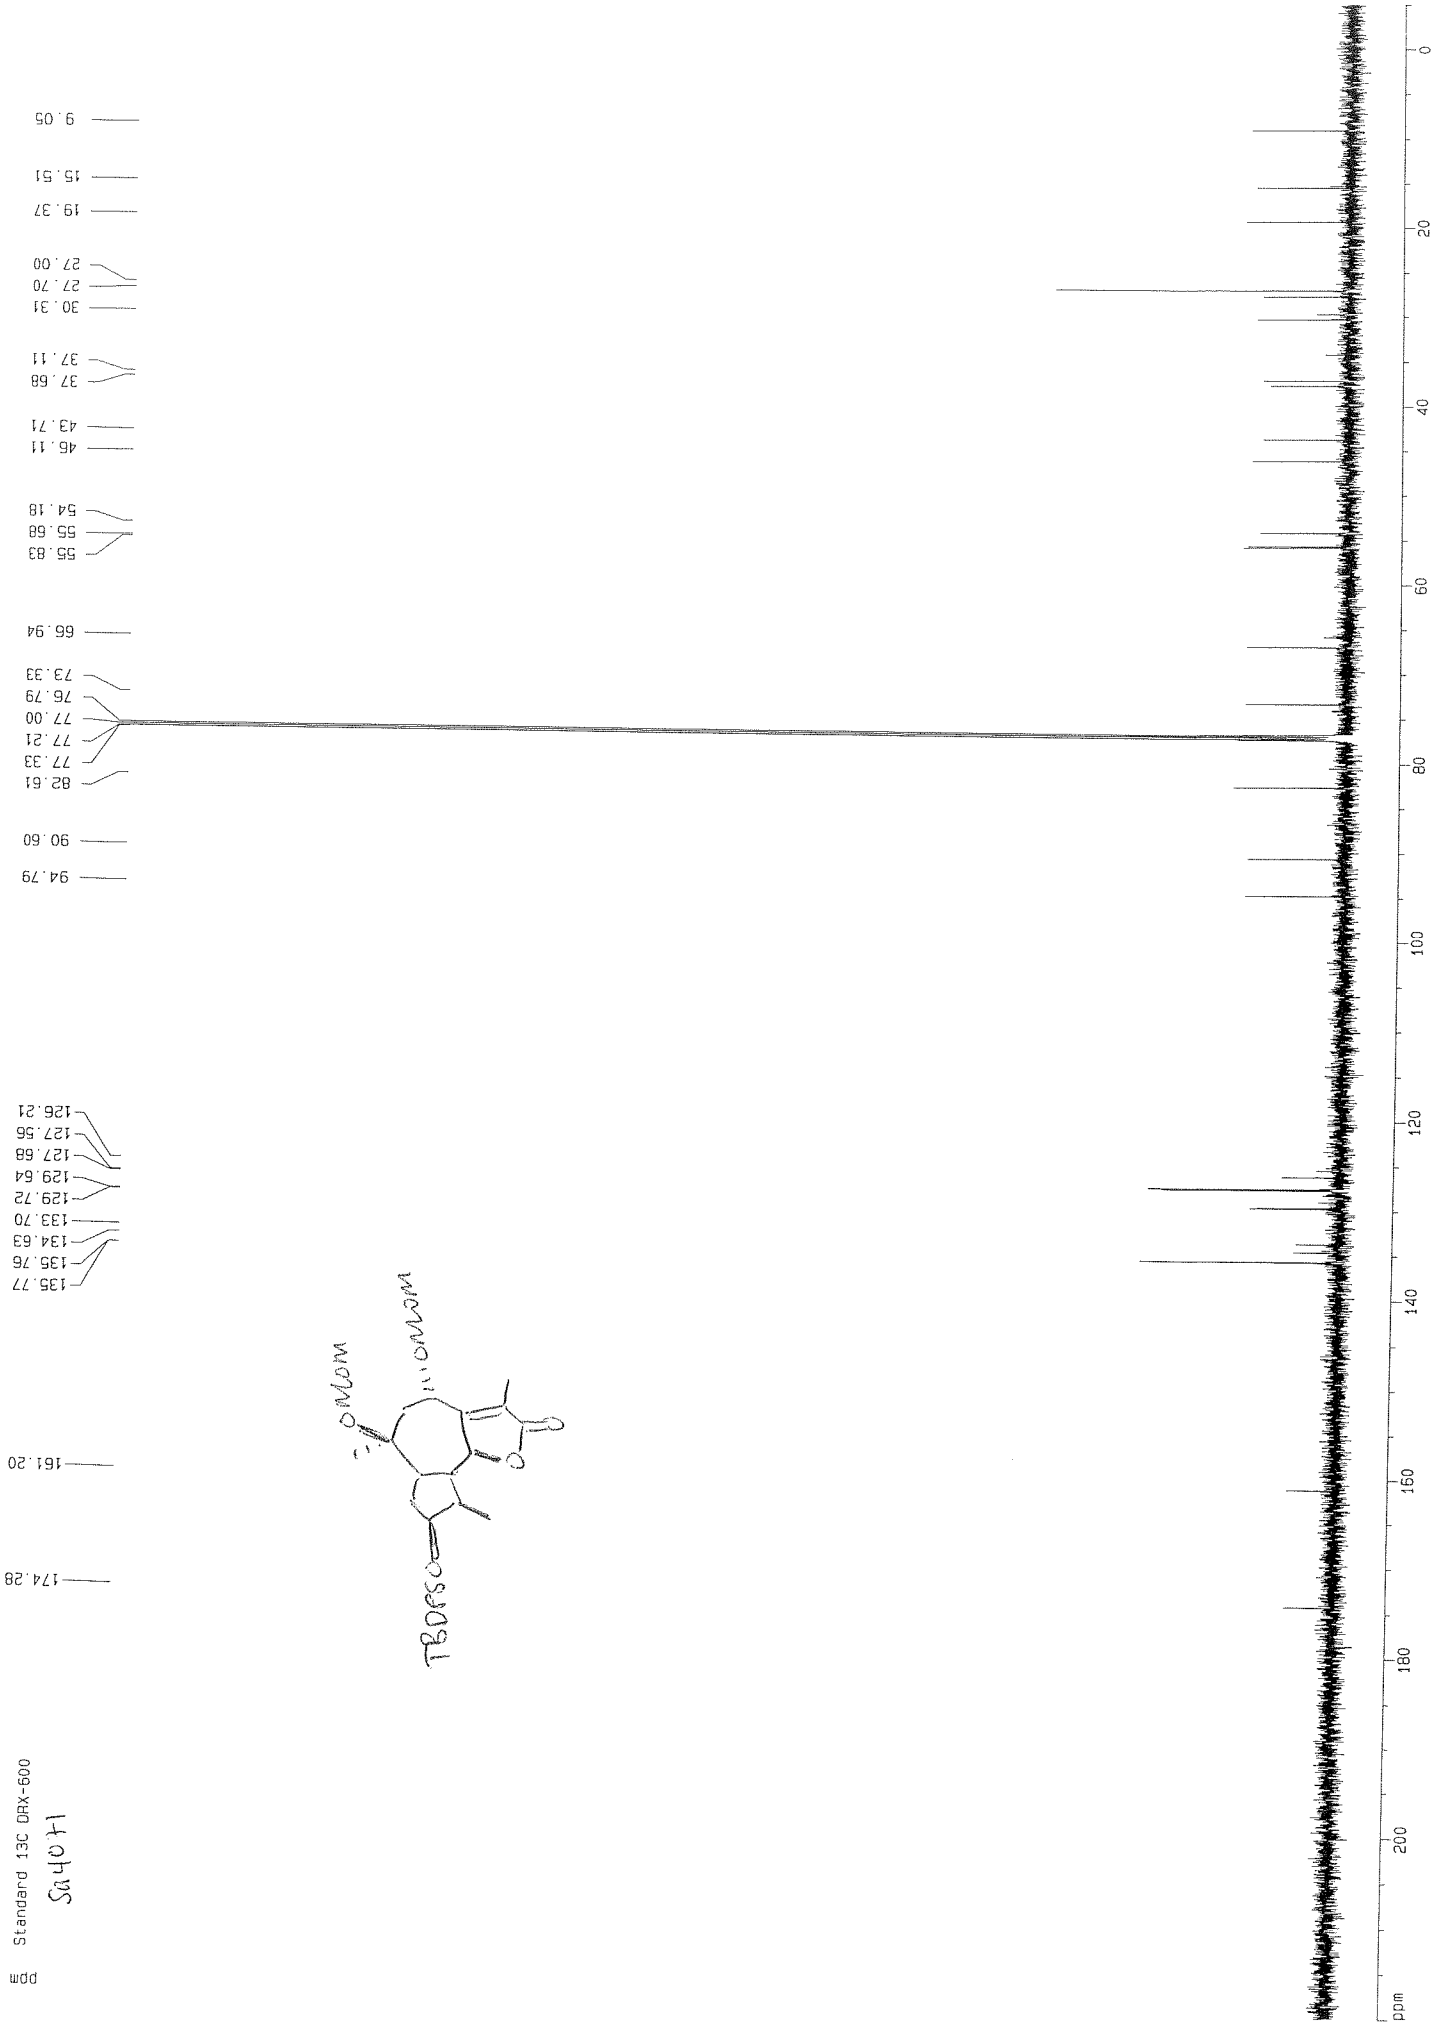

564090, cd13  
Standard 1H DFX-600

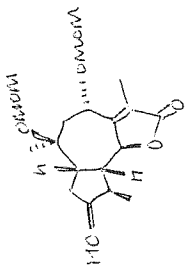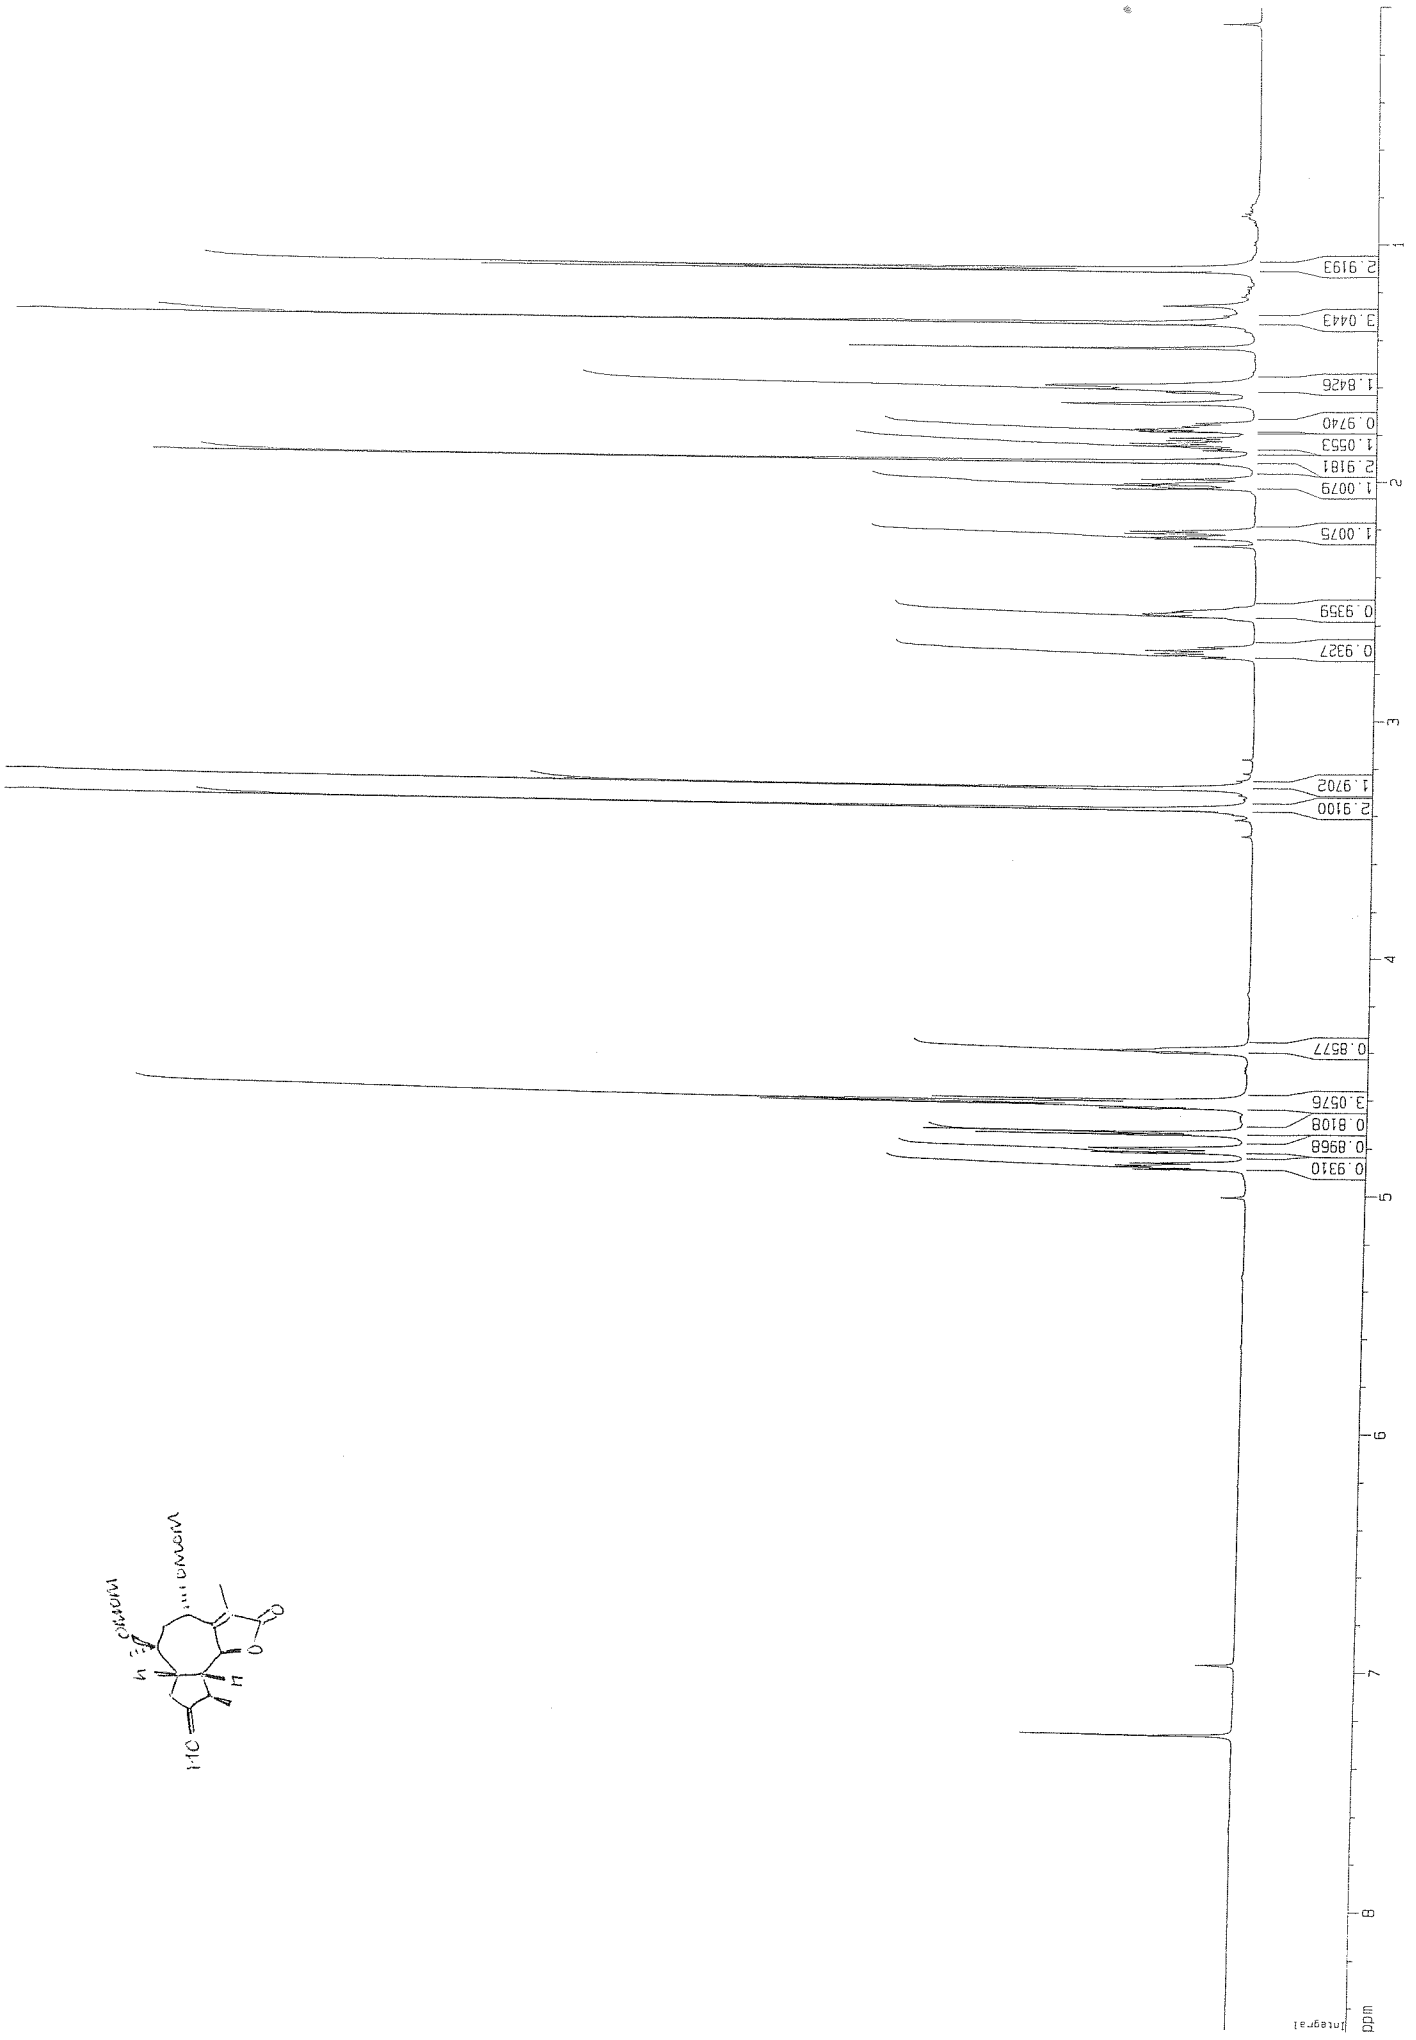

Standard 13C DFX-600  
554090

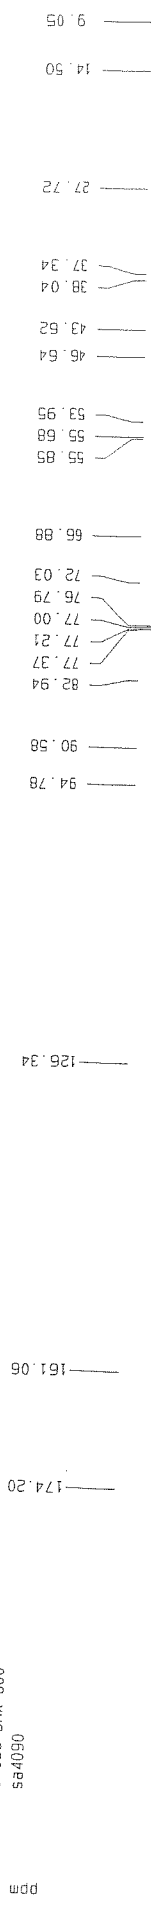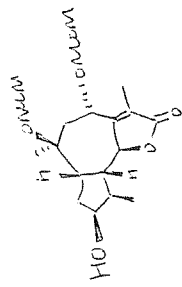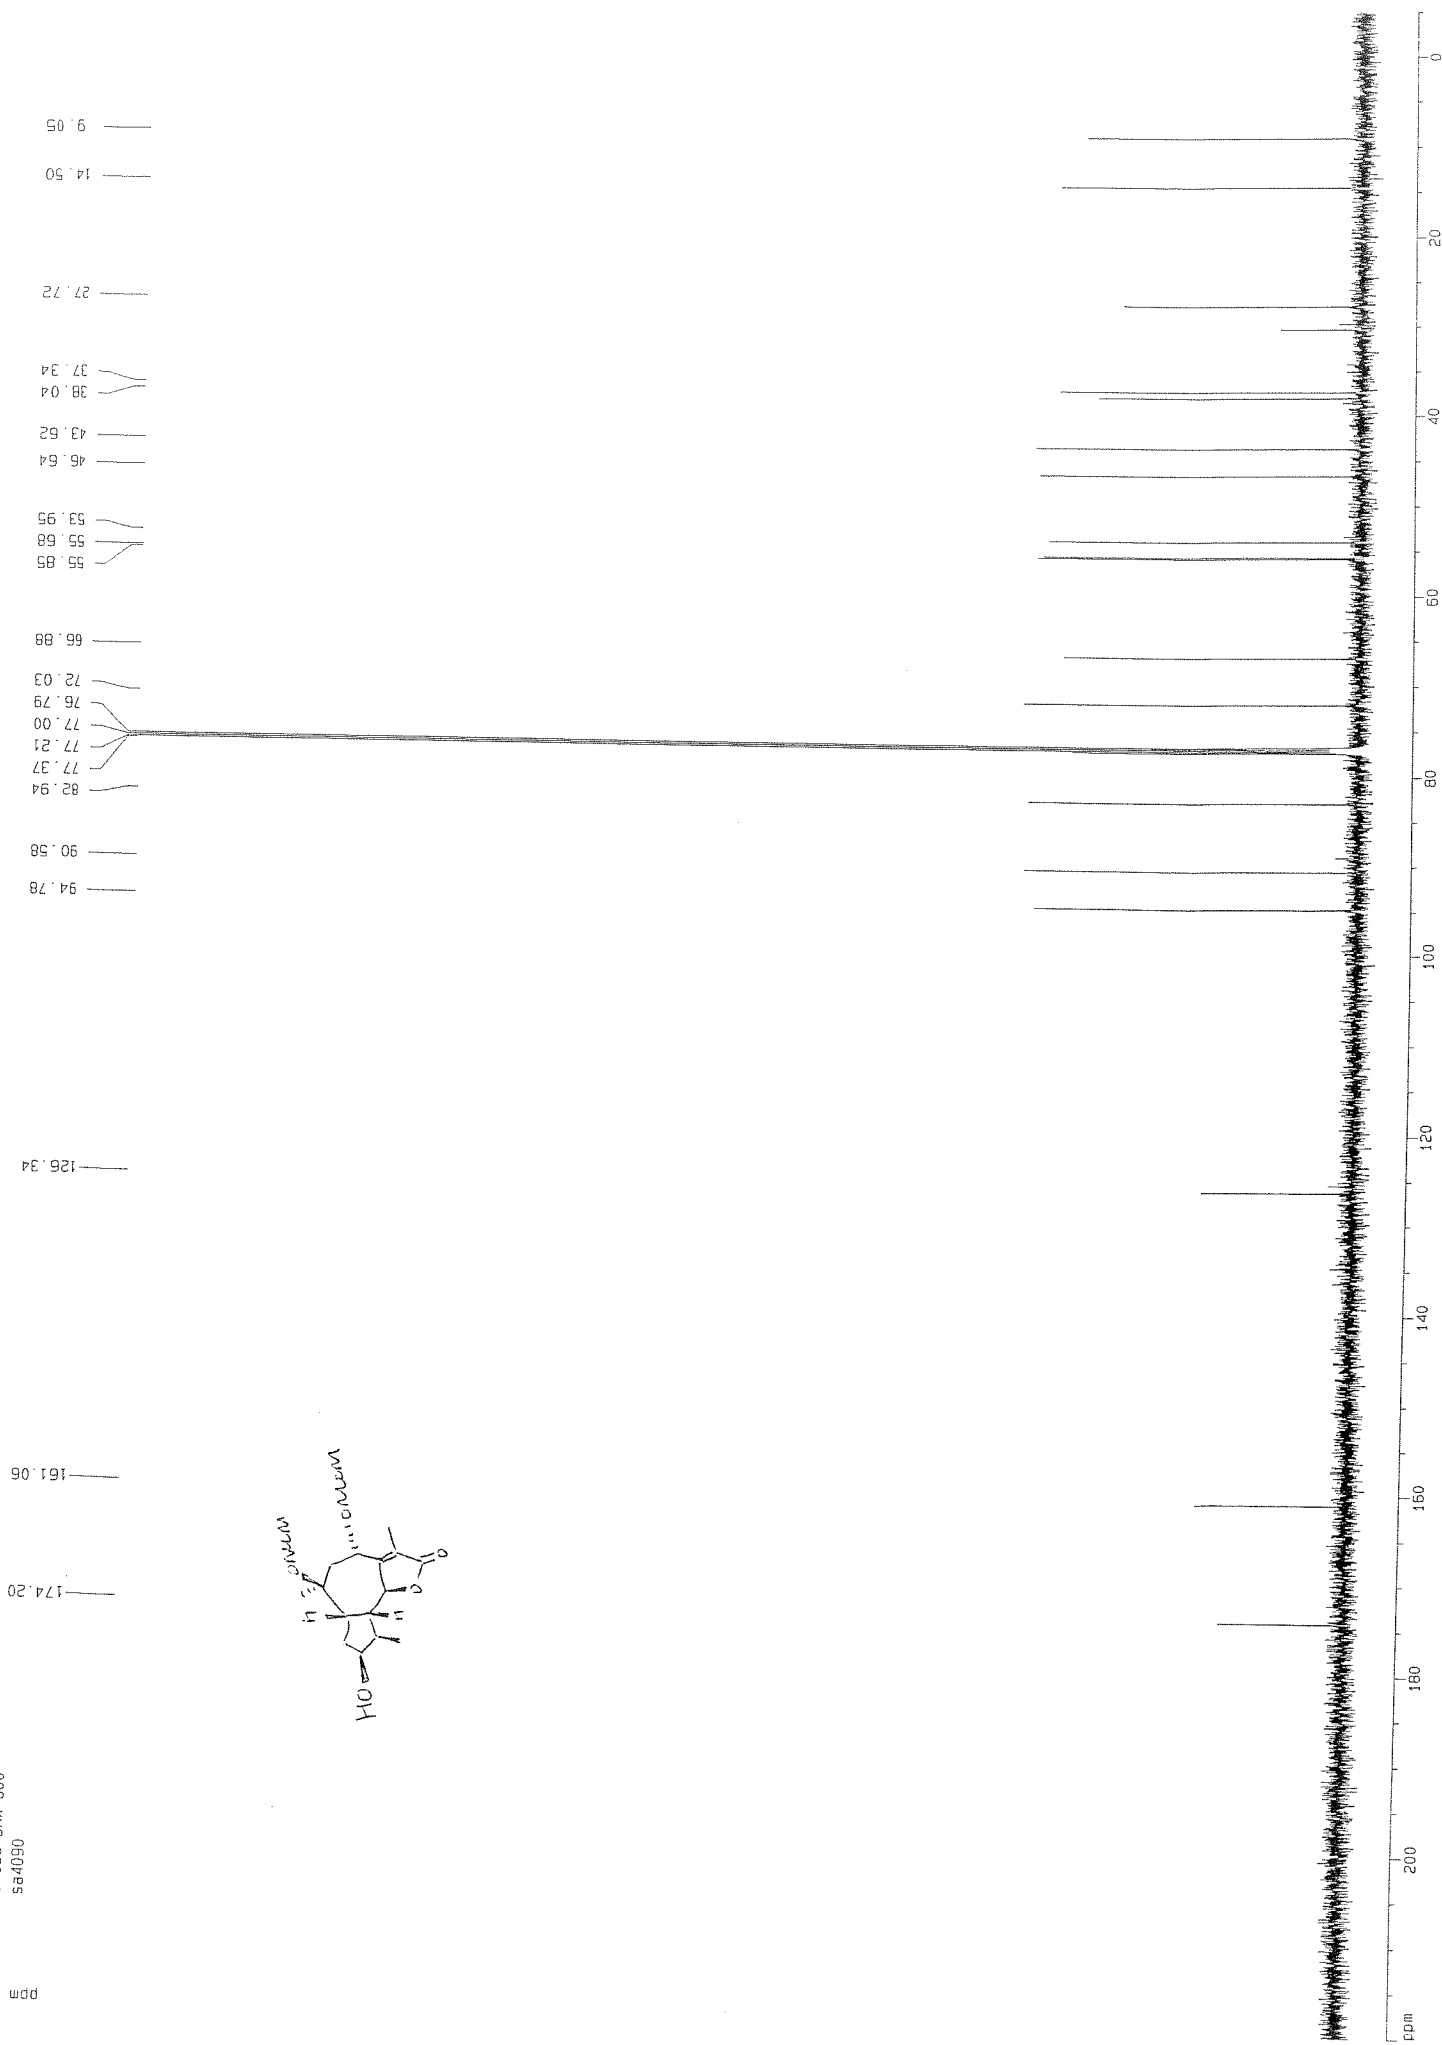

Standard 1H DRX-600  
884093

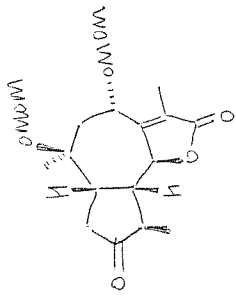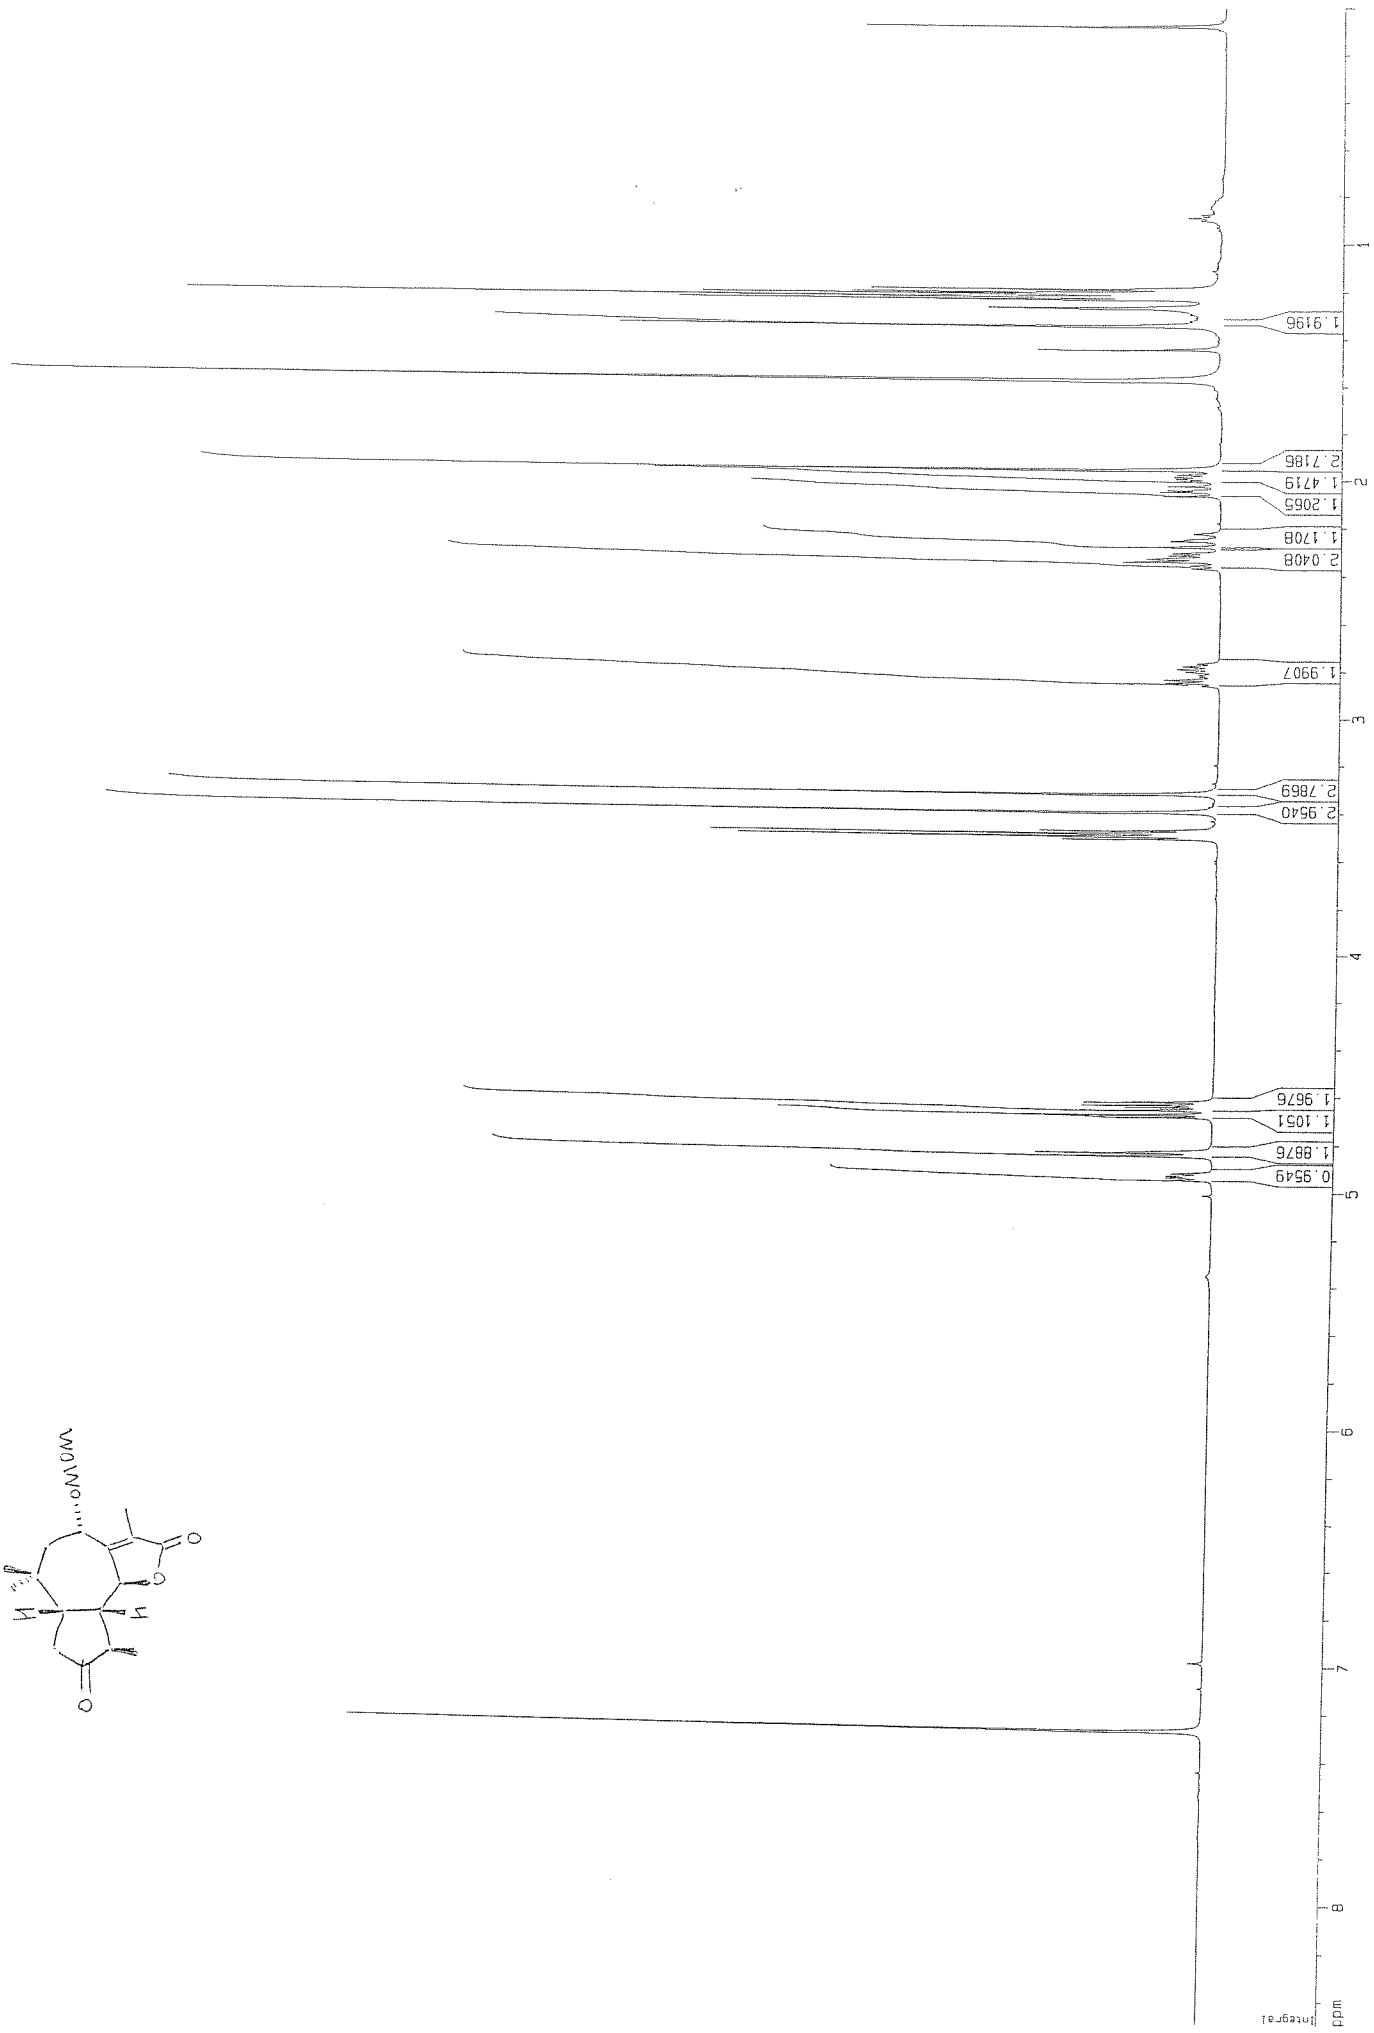



Standard 1H Dic-009  
566010

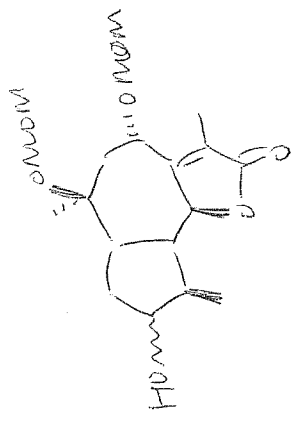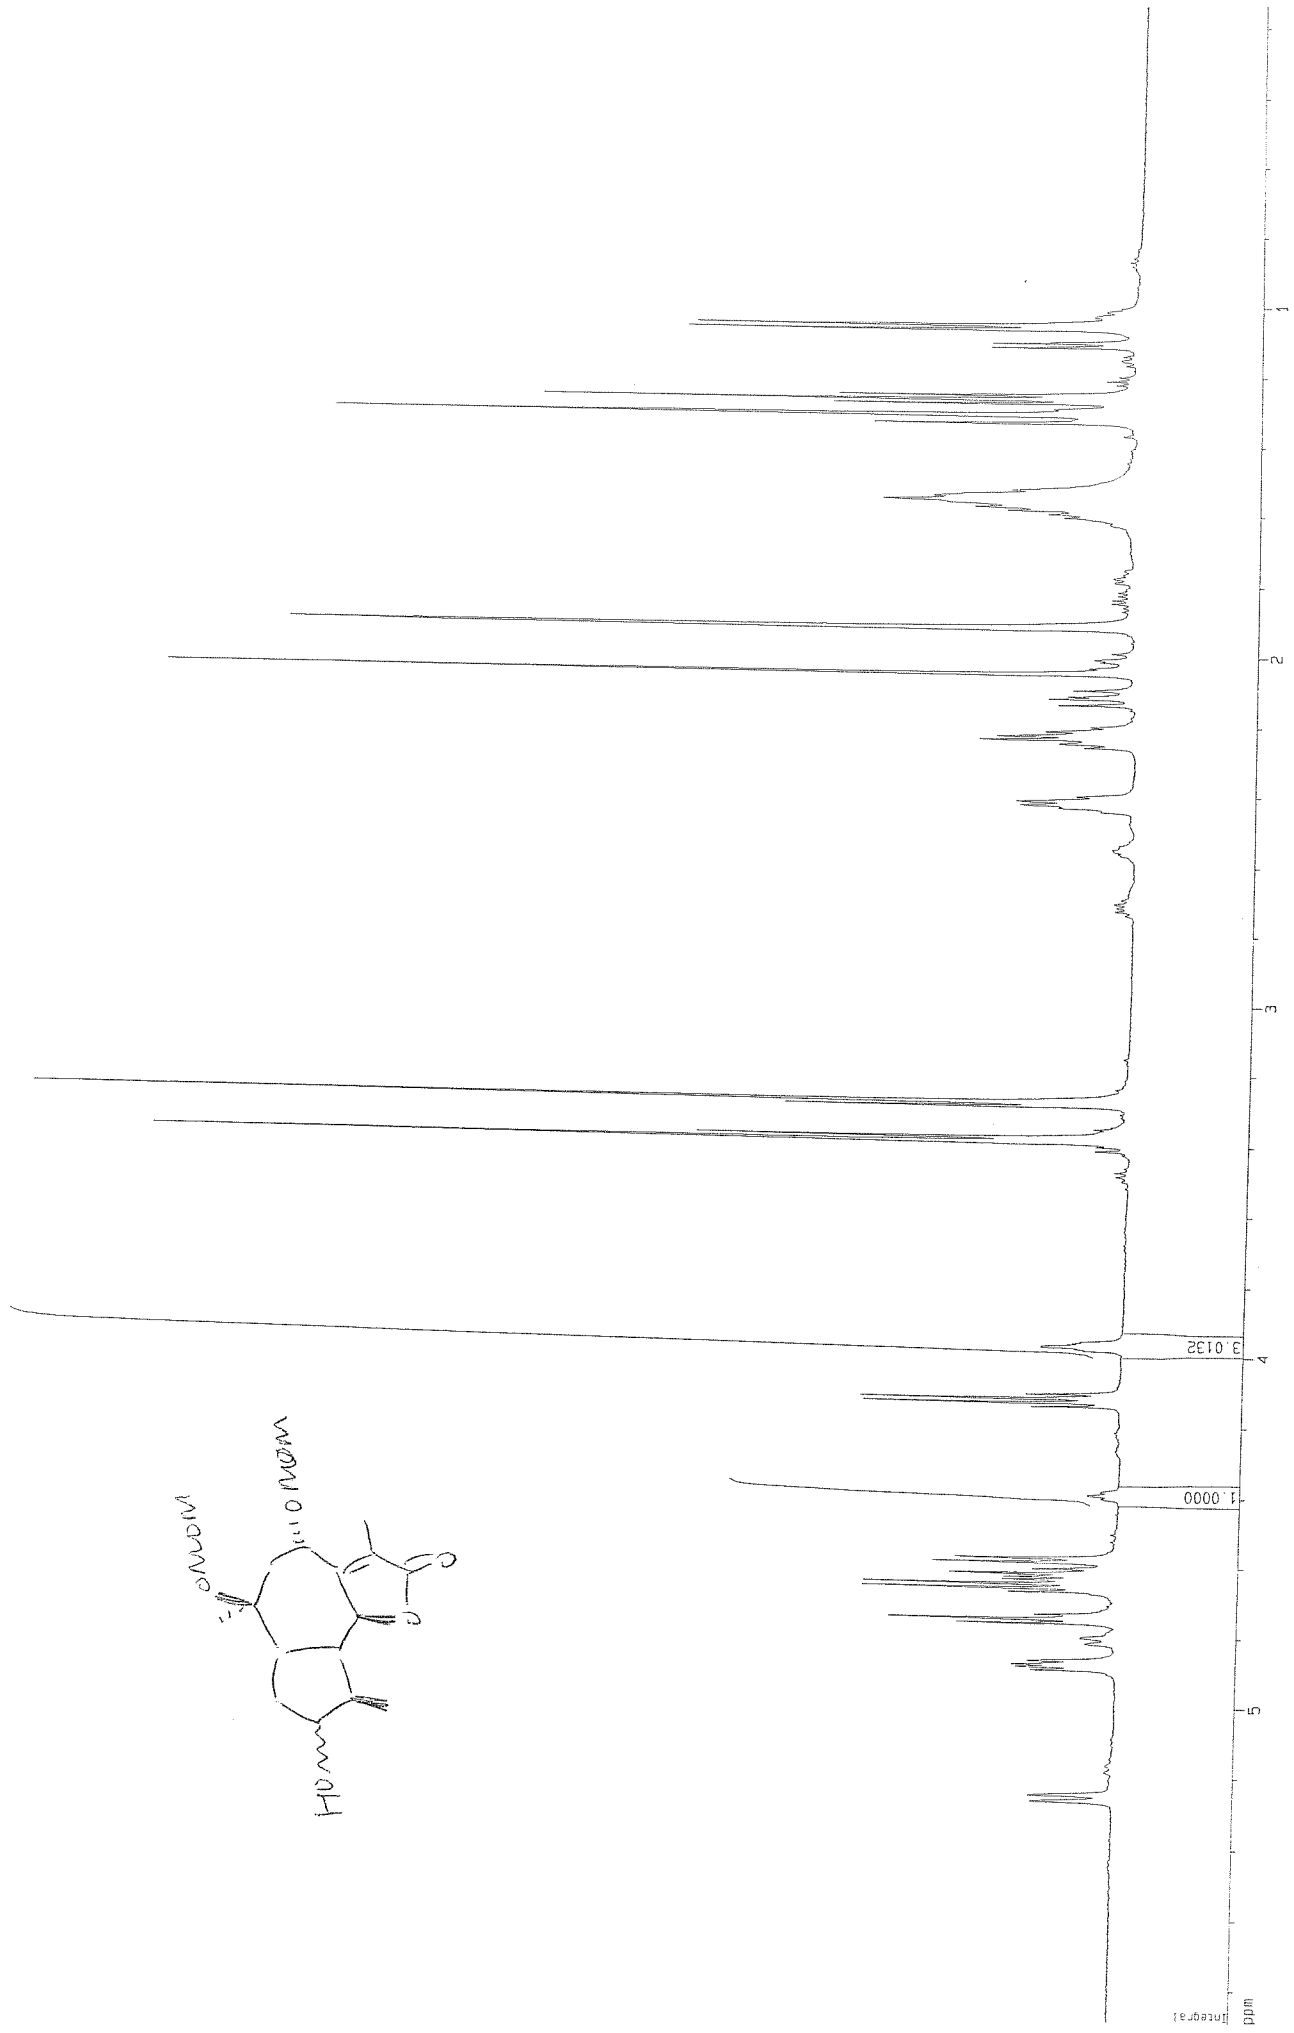



0.96  
9.05  
9.10  
14.07  
14.48  
15.23  
18.35  
22.53  
25.71  
27.71  
27.95  
29.32  
29.40  
29.62  
29.66  
31.89  
37.06  
37.36  
37.57  
38.07  
43.62  
46.66  
47.28  
47.40  
53.71  
53.94  
55.67  
55.74  
55.84  
55.87  
65.81  
66.87  
67.21  
72.08  
76.76  
76.97  
77.18  
77.31  
77.36  
77.36  
78.73  
82.44  
82.92  
90.59  
90.66  
94.77  
95.00

126.23

161.62

174.40

500

Standard 1:1c DMX-600

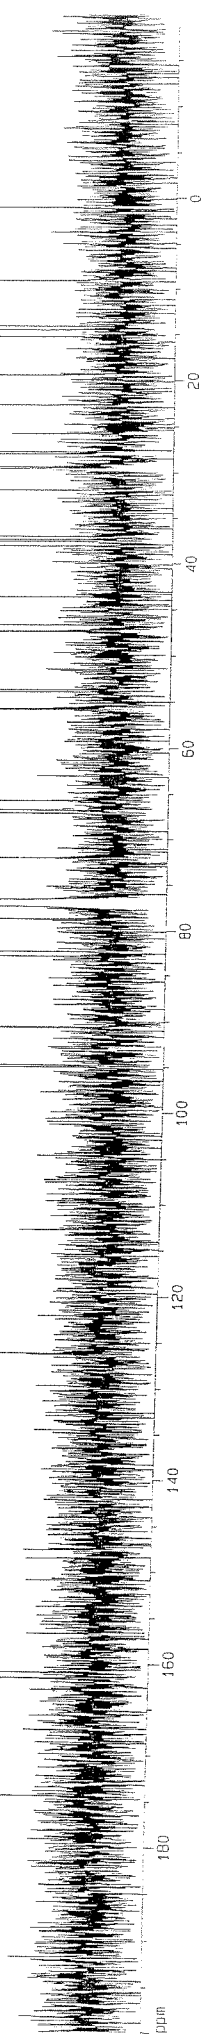

Standard 1H NMR 300  
sa6019

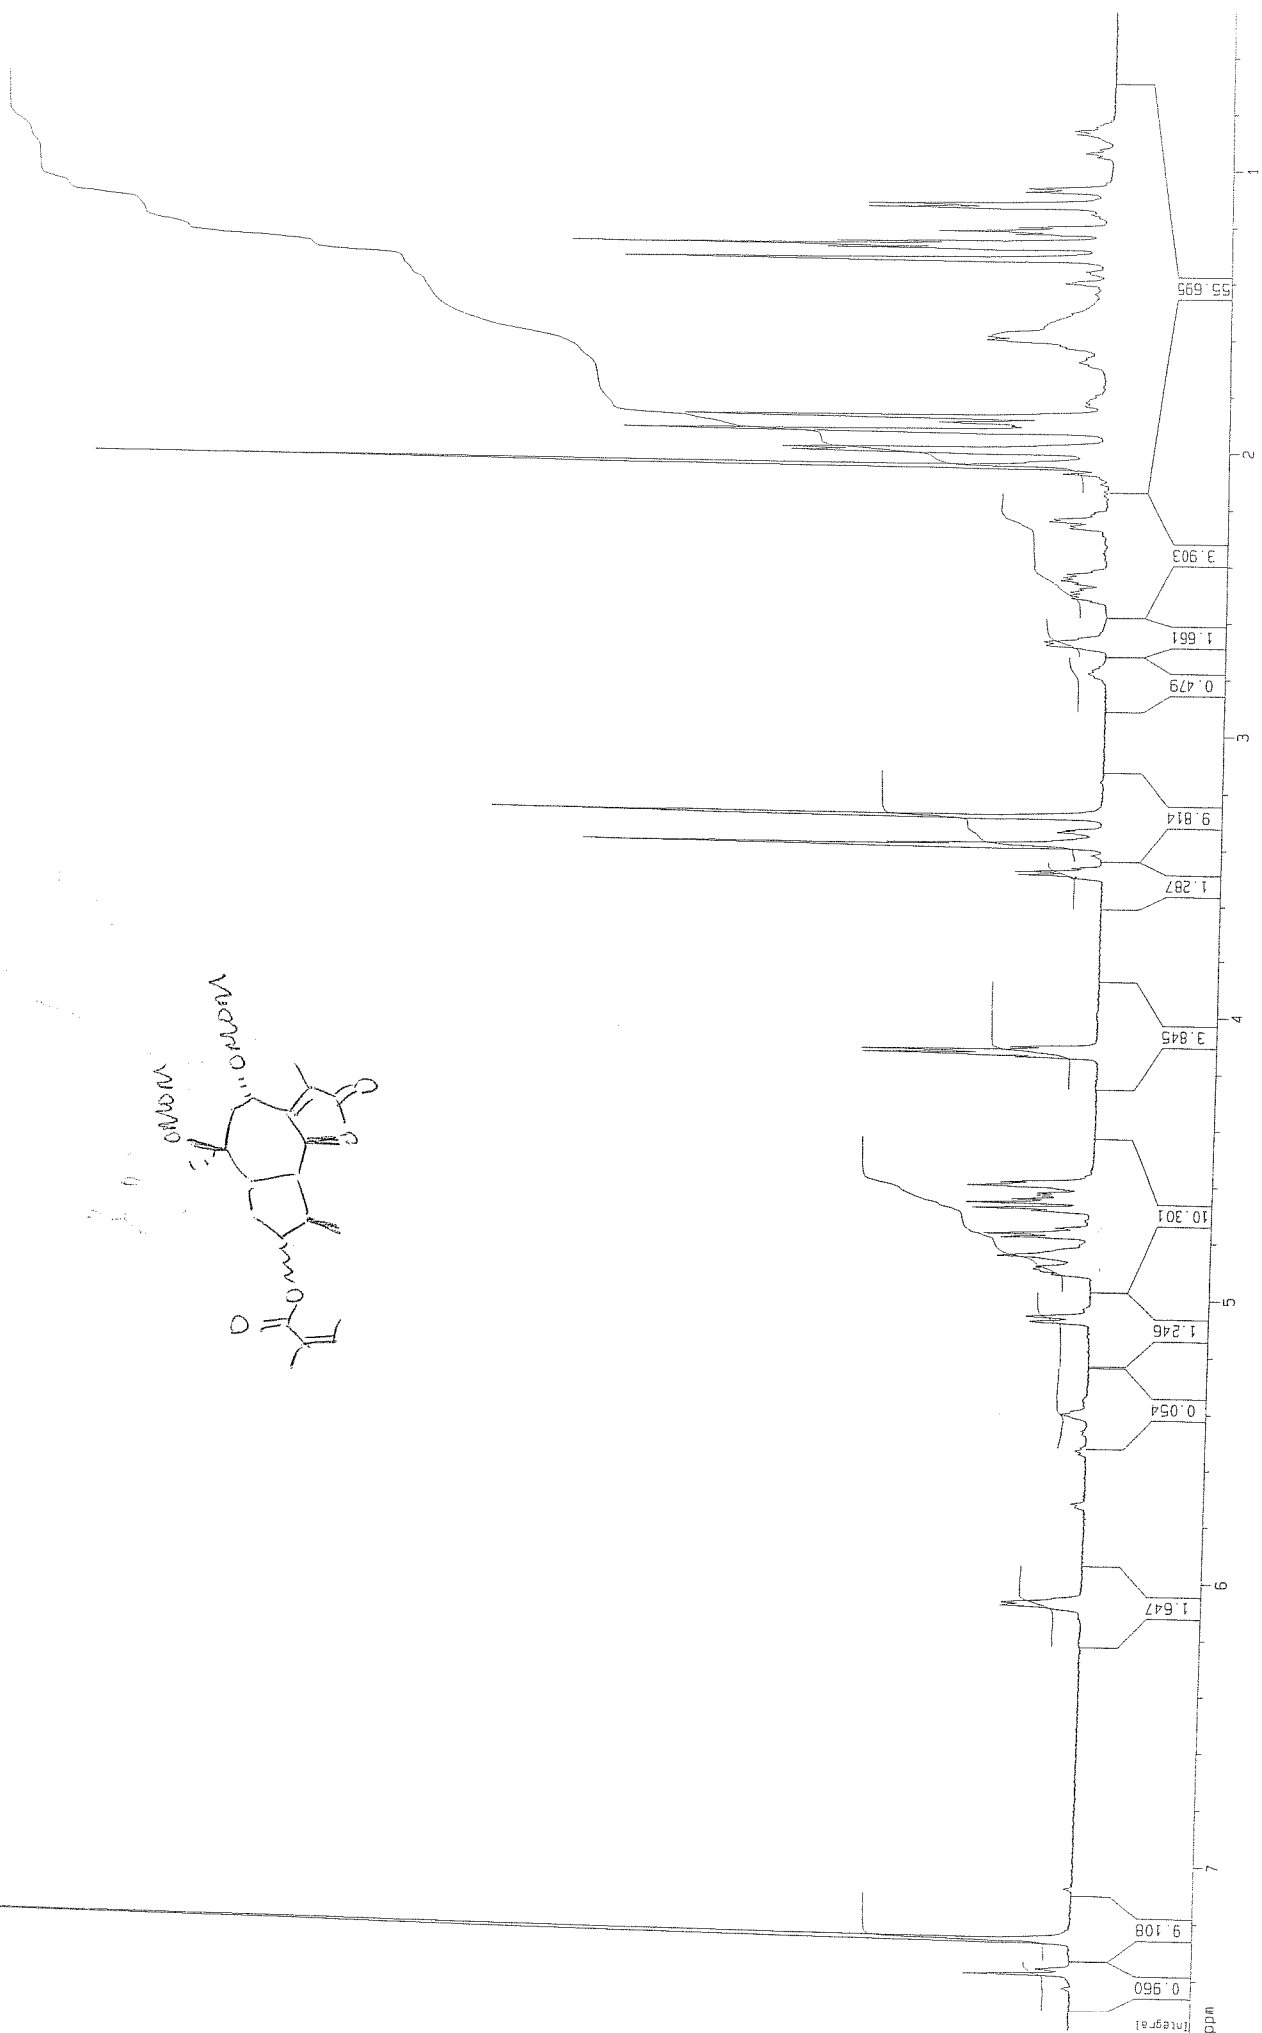

145014

Standard 13C DMF-d6

ppm

- 174.24
- 167.68
- 167.53
- 161.47
- 160.86
- 138.30
- 138.05
- 136.91
- 127.66
- 126.56
- 116.22
- 116.17
- 95.19
- 94.84
- 90.72
- 90.67
- 82.22
- 81.47
- 81.42
- 80.45
- 80.05
- 77.19
- 77.13
- 76.98
- 76.77
- 74.25
- 67.34
- 66.89
- 55.95
- 55.87
- 55.78
- 55.73
- 54.13
- 53.41
- 47.40
- 47.34
- 47.07
- 43.87
- 43.83
- 43.59
- 41.87
- 37.83
- 37.46
- 37.42
- 35.05
- 34.90
- 34.53
- 27.91
- 20.61
- 19.32
- 19.13
- 16.57
- 15.80
- 15.72
- 15.35
- 9.14
- 8.08

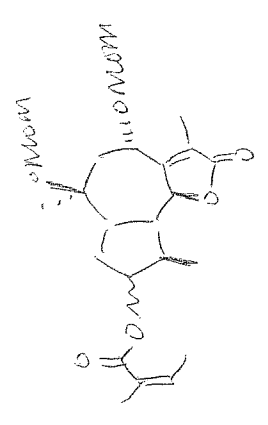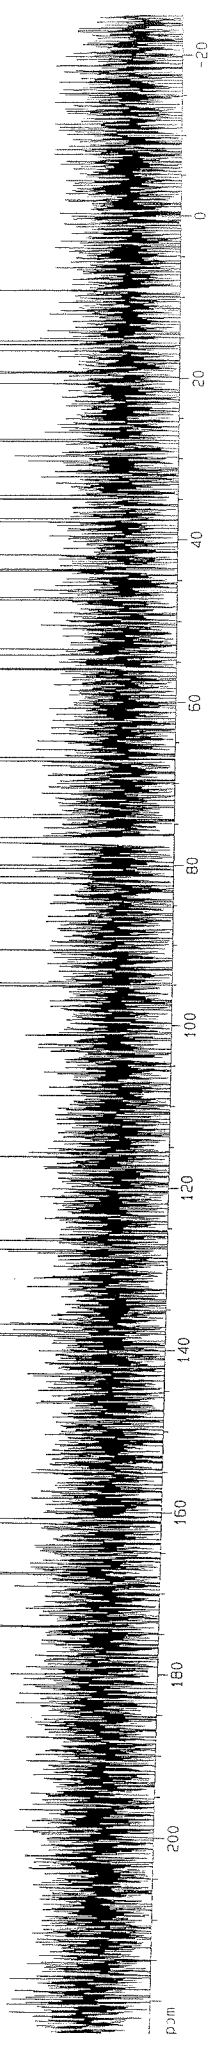

F2 - Acquisition Parameters  
Date: 20070125  
Time: 14:11

Current Data Parameters  
NAME: sa609  
EXPNO: 1  
PROCNO: 1

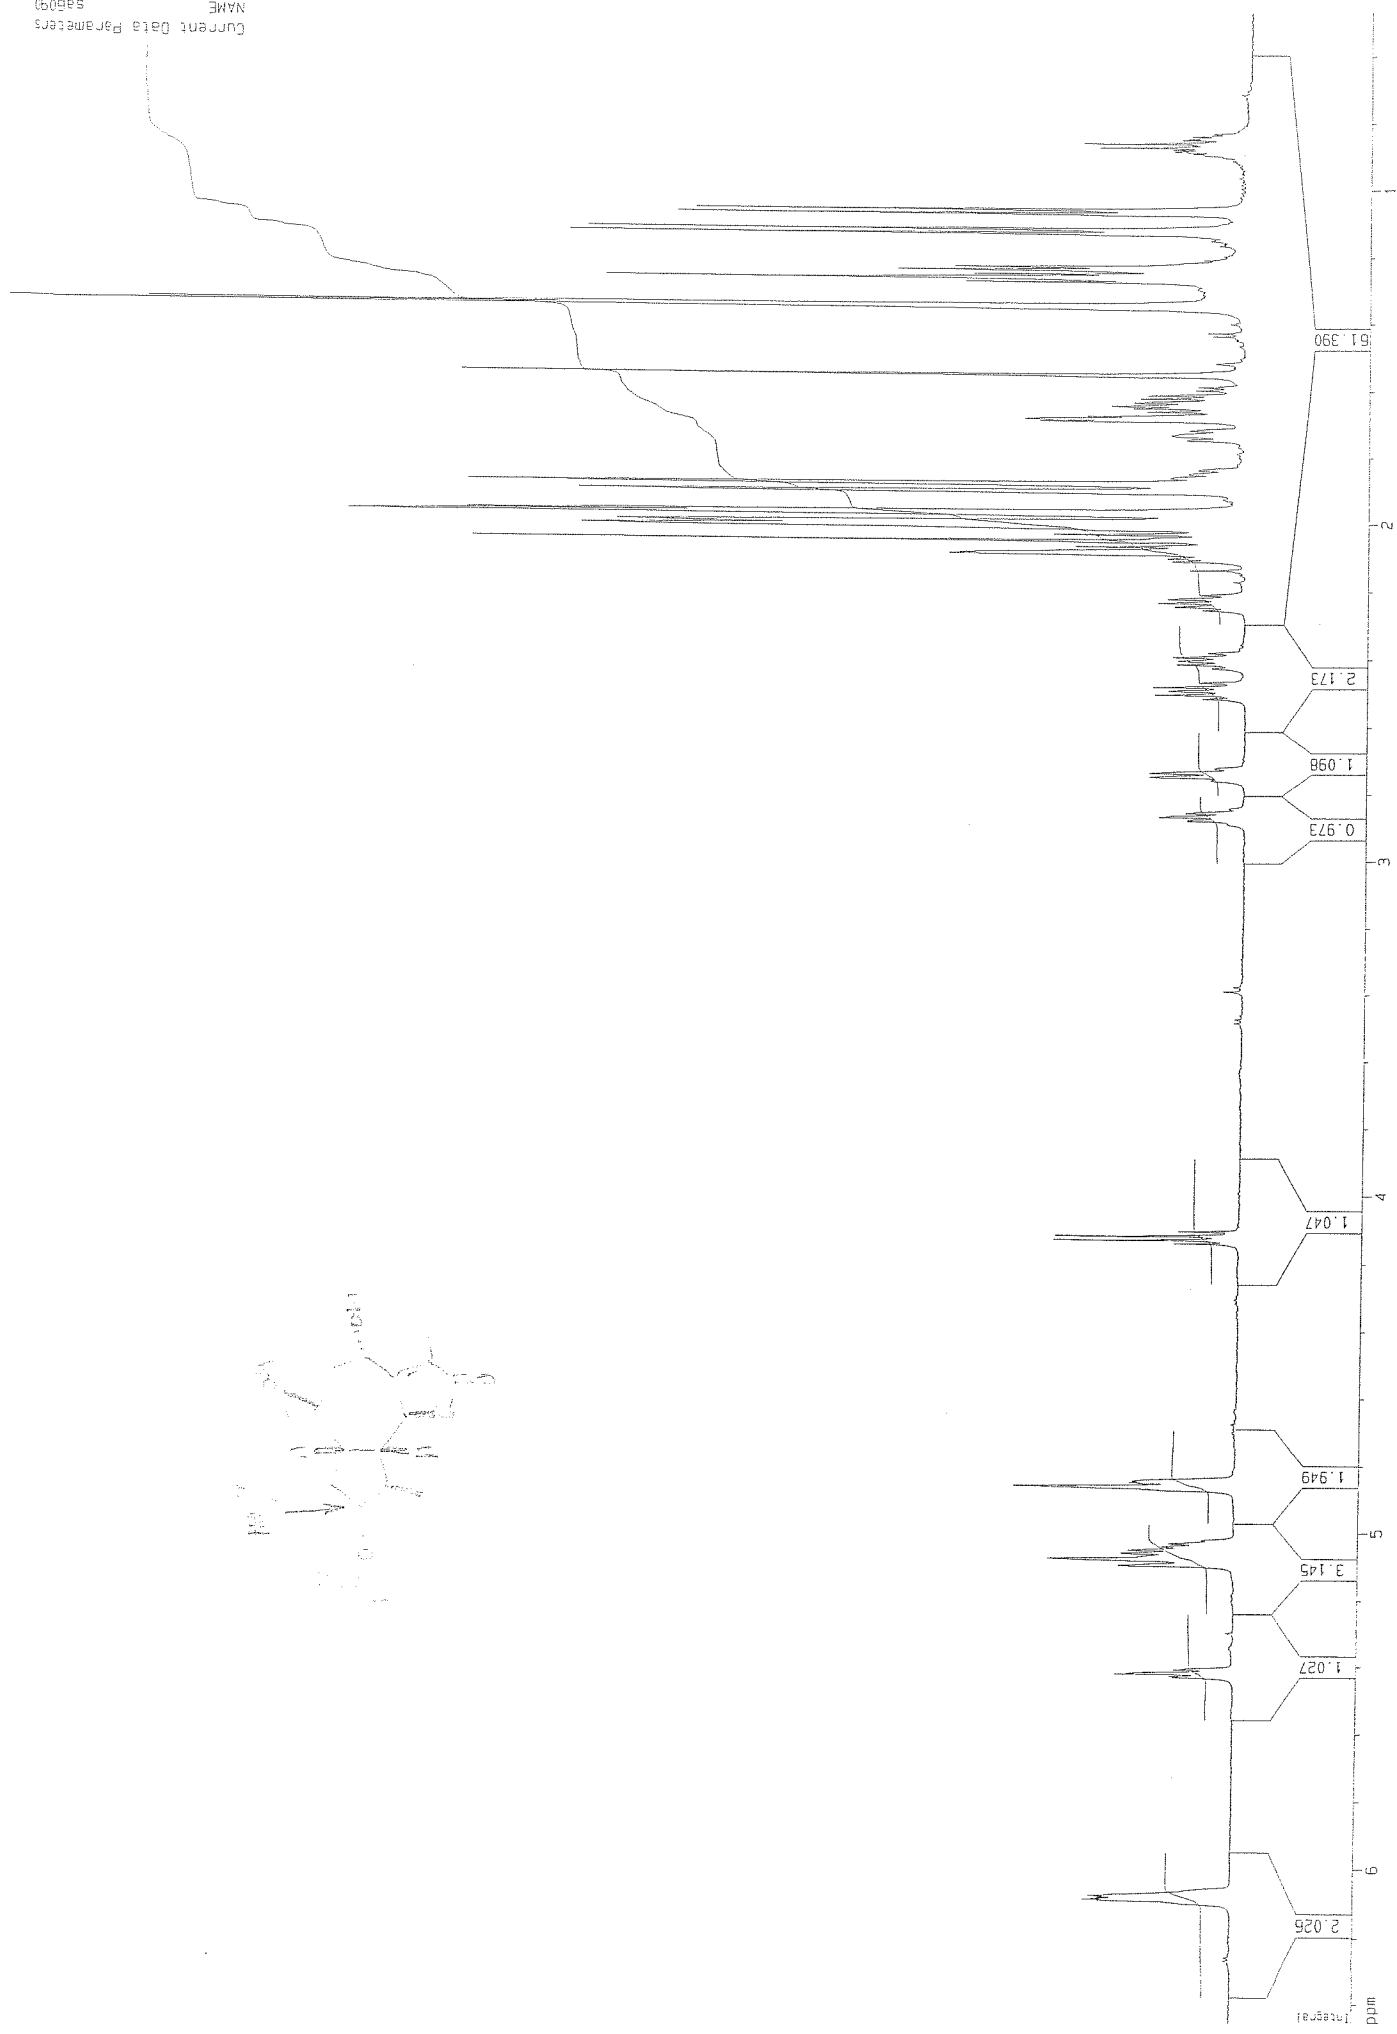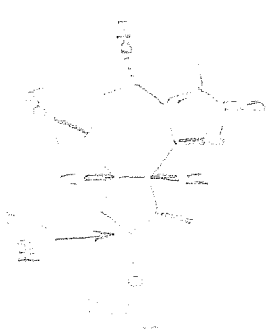

Standard 1H DRX-600  
sa609

- 91.17
- 80.52
- 80.06
- 77.19
- 76.97
- 76.76
- 74.10
- 71.87
- 71.83
- 62.61
- 62.54
- 53.16
- 52.28
- 50.75
- 50.30
- 43.68
- 41.45
- 40.48
- 40.26
- 35.11
- 34.92
- 33.45
- 33.25
- 20.52
- 20.58
- 19.34
- 15.81
- 15.74
- 15.41
- 9.12
- 9.04

- 127.09
- 127.11
- 127.59
- 127.85
- 138.19
- 138.42

- 173.99
- 173.80
- 167.63
- 167.48
- 163.27
- 162.91

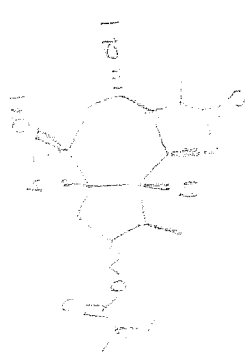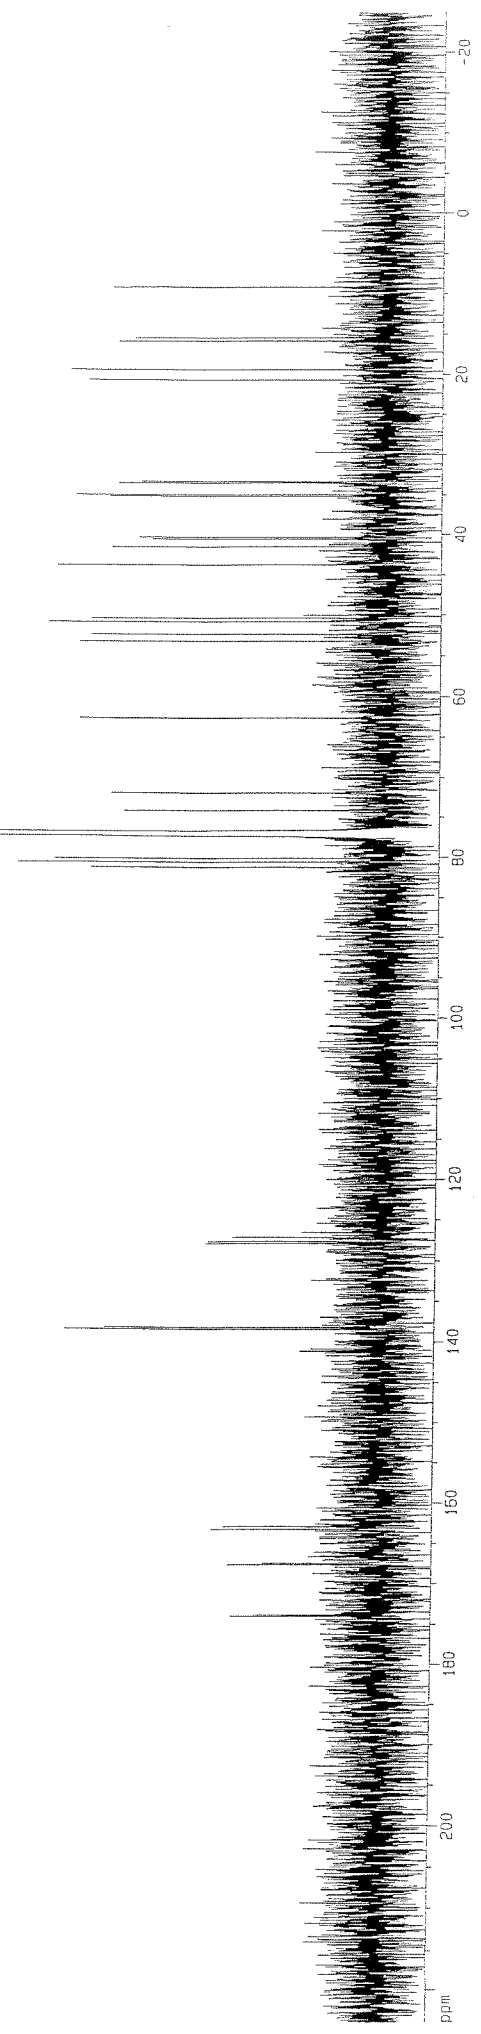

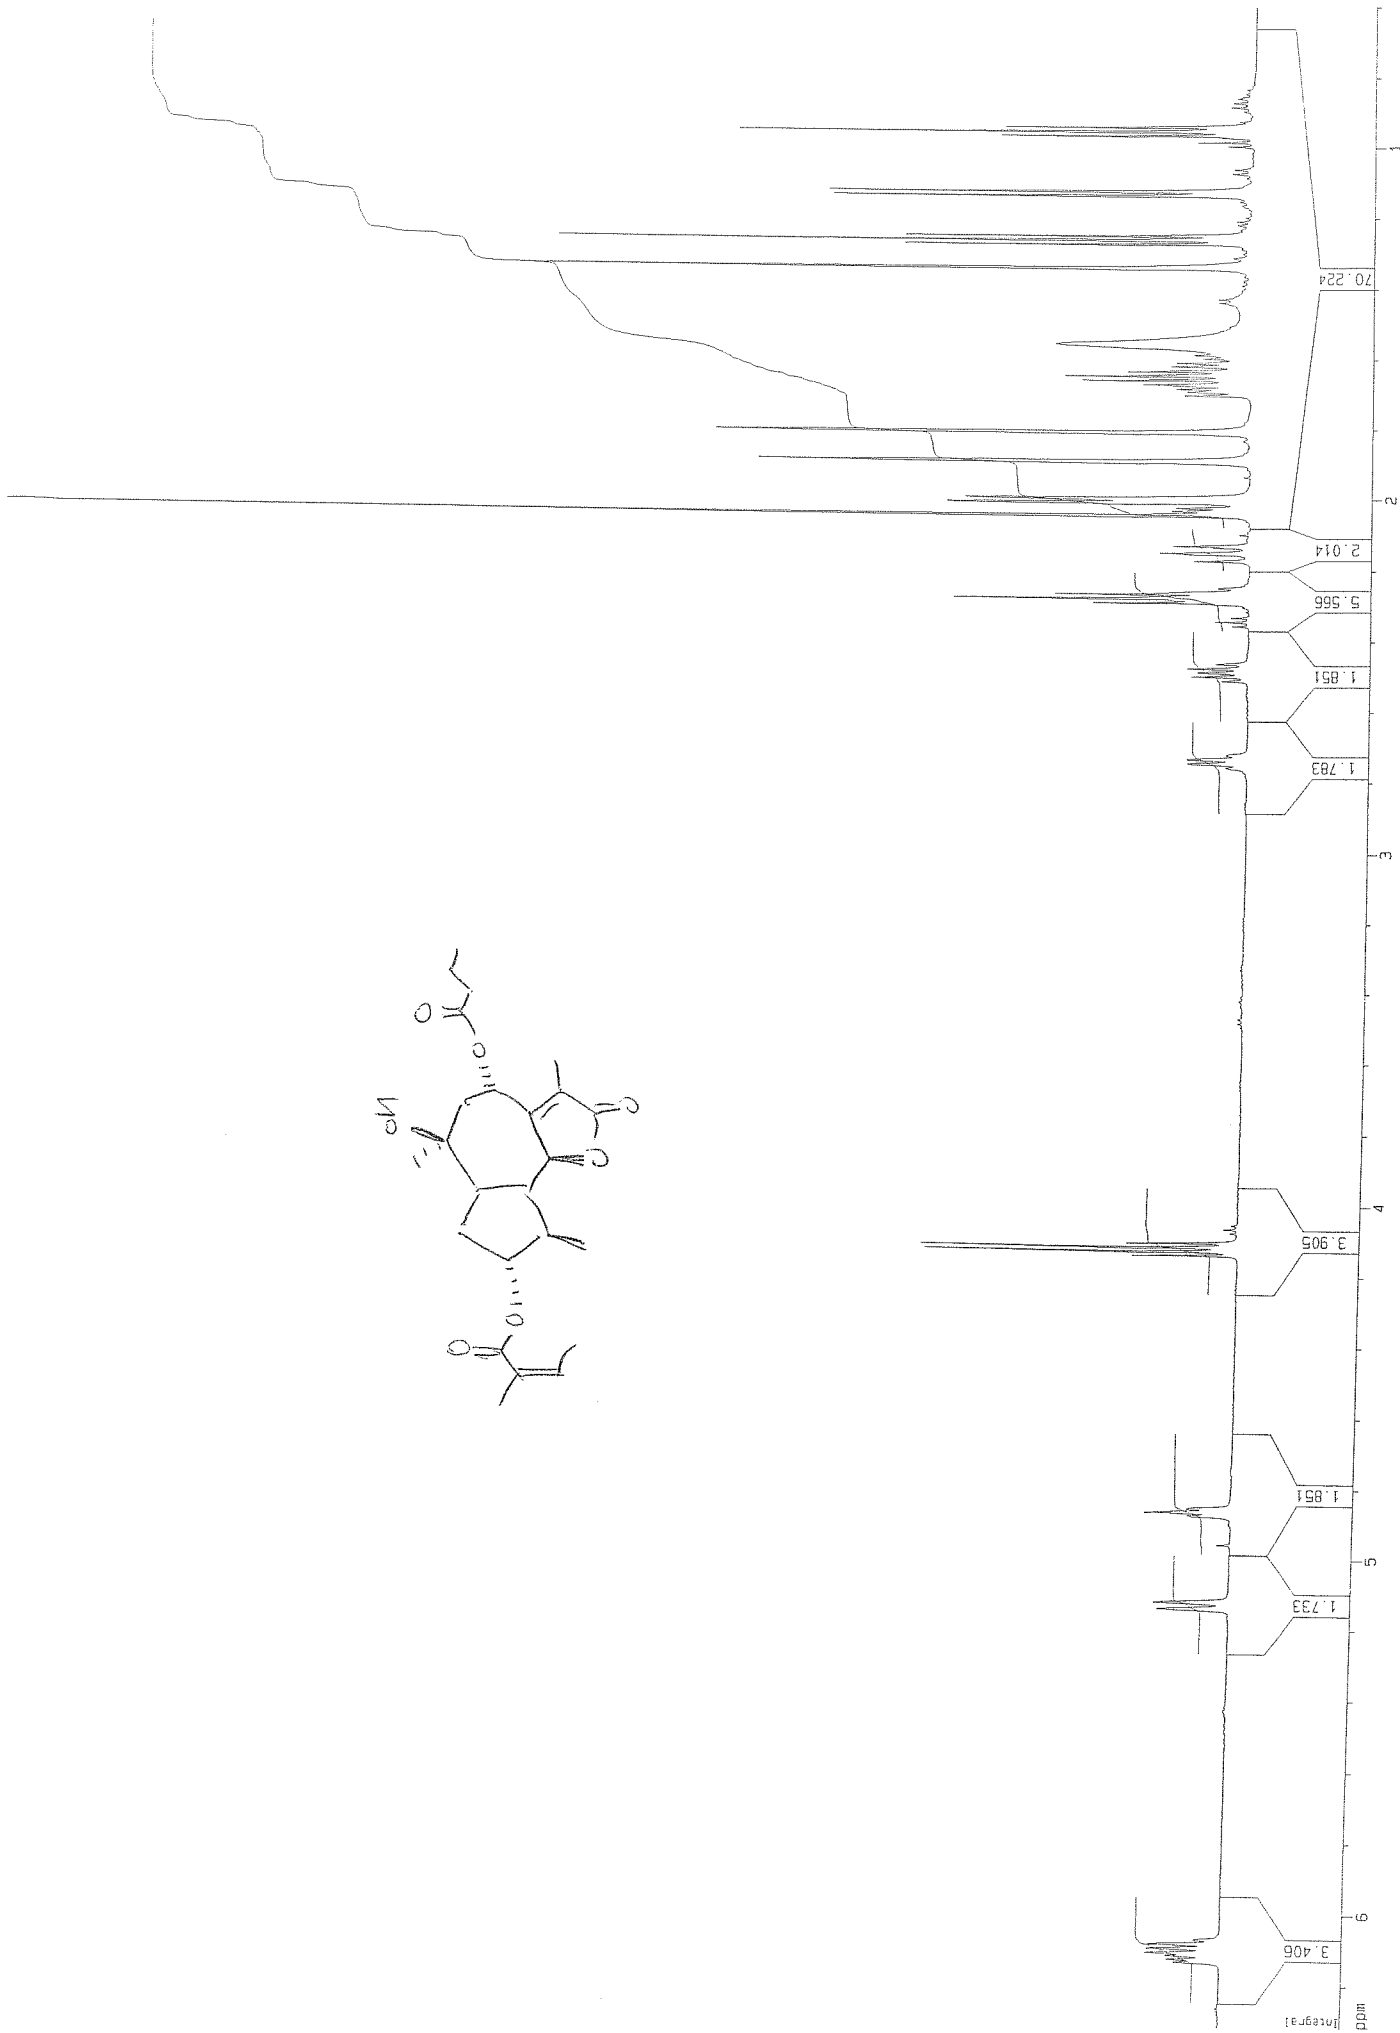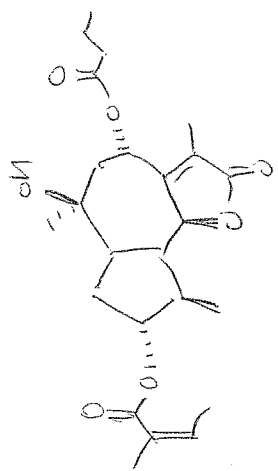

Sr5018.3

- 174.15
- 174.10
- 173.67
- 173.64
- 173.62
- 172.42
- 167.67
- 159.87
- 159.83
- 151.51
- 138.42
- 137.63
- 136.99
- 136.76
- 135.77
- 128.25
- 127.73
- 127.65
- 125.51
- 116.25
- 116.18

- 81.10
- 81.06
- 81.03
- 80.48
- 80.08
- 77.21
- 77.00
- 76.79
- 71.82
- 64.69
- 64.67
- 52.04
- 50.34
- 50.27
- 43.72
- 43.68
- 43.67
- 43.65
- 43.61
- 36.81
- 36.75
- 36.06
- 34.81
- 34.45
- 34.42
- 34.22
- 33.29
- 30.32
- 29.69
- 21.17
- 20.64
- 19.35
- 19.21
- 19.15
- 18.50
- 16.59
- 16.53
- 15.83
- 13.63
- 9.11
- 1.01

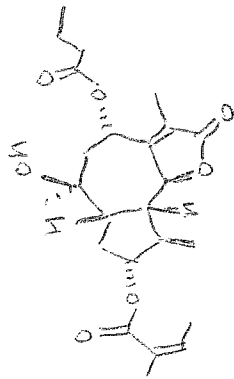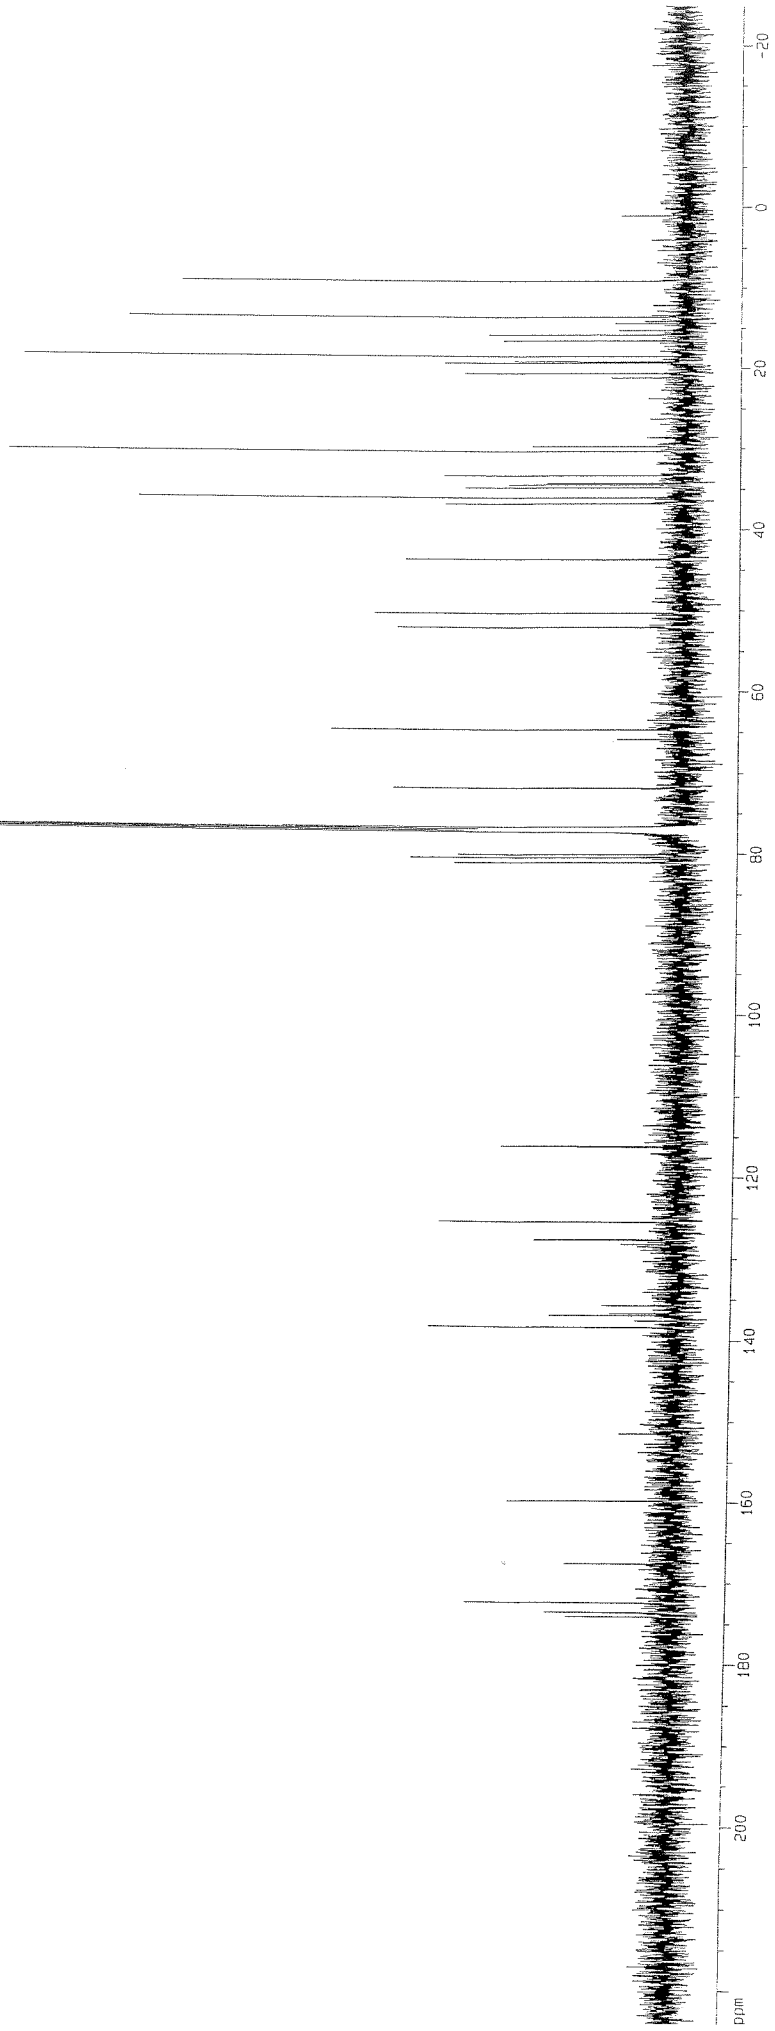

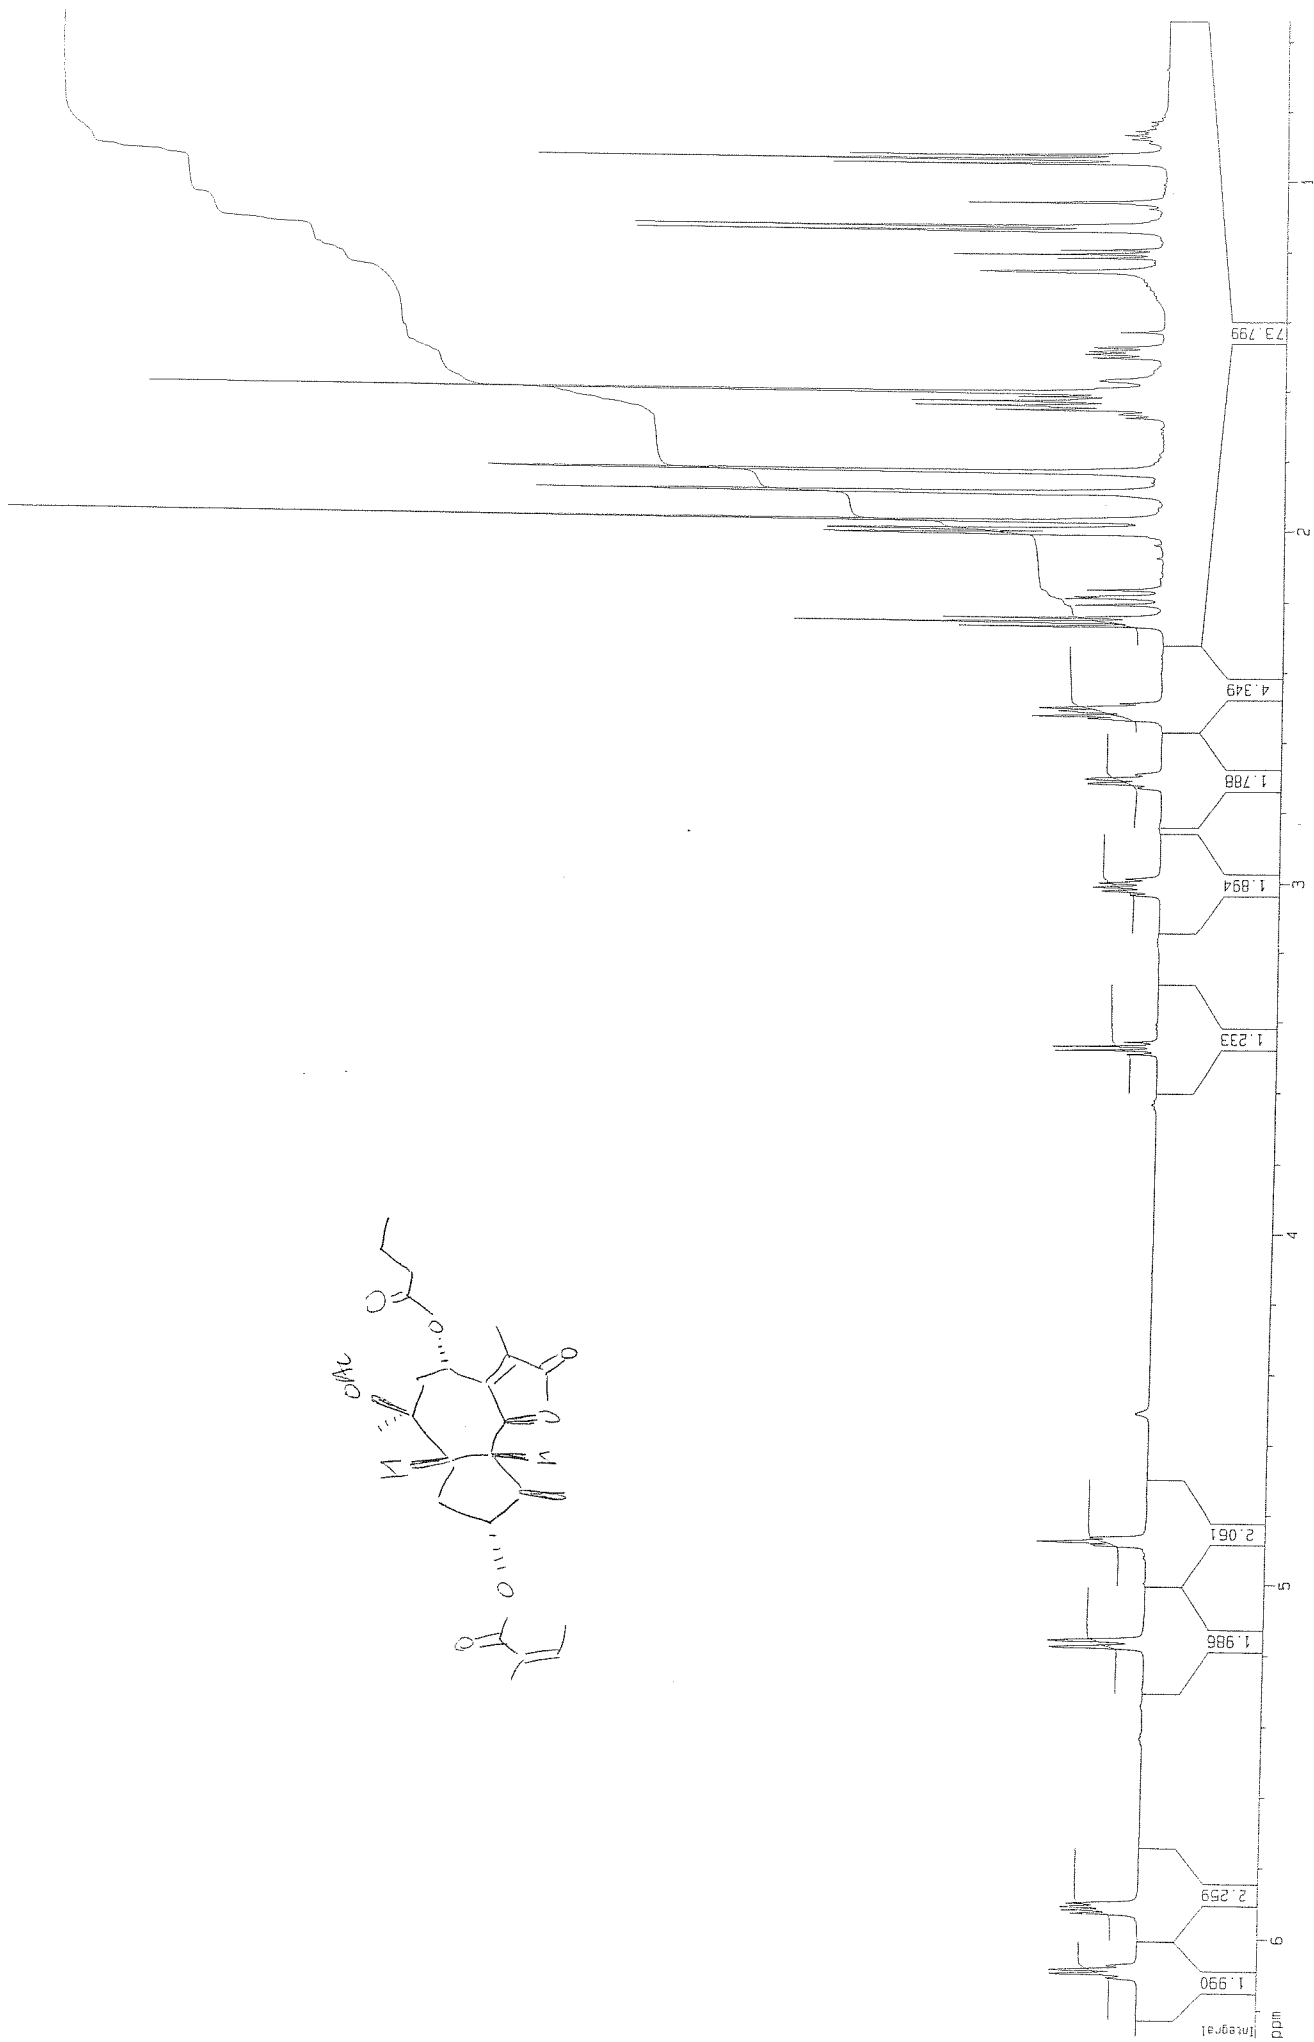



Standard 13C NMR (ppm)  
s202023

- 173.76
- 172.05
- 169.83
- 167.88
- 159.82
- 138.51
- 130.24
- 128.10
- 127.80

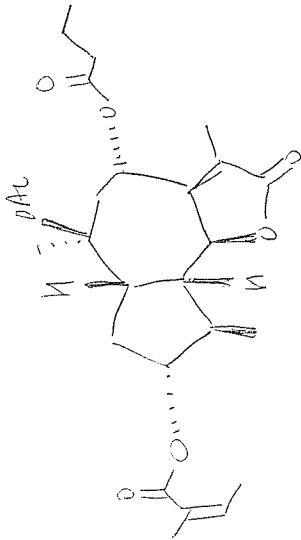

- 82.66
- 81.32
- 79.82
- 77.21
- 77.00
- 76.72
- 63.86
- 52.64
- 49.10
- 48.80
- 39.97
- 39.40
- 34.15

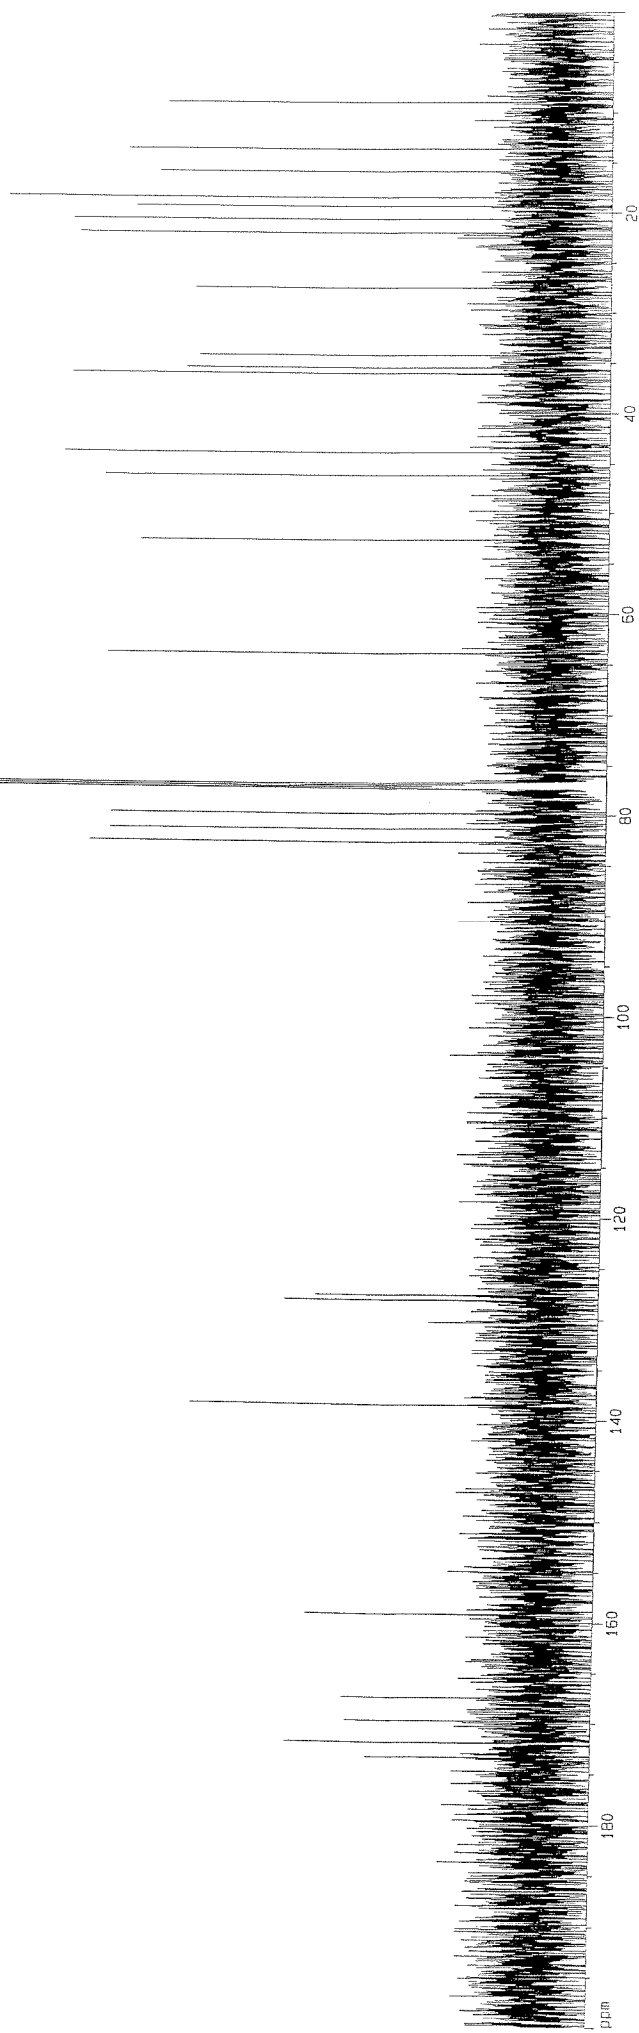

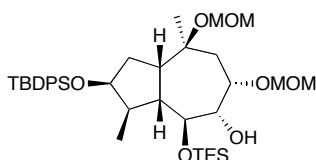

23

**Alcohol 23:** Sodium borohydride (17.0 mg, 0.446 mmol) was added in 2 batches to a solution of ketone **13** (30.6 mg, 0.045 mmol) in THF (0.1 mL) at 0 °C. After stirring for 3.5 hours at this temperature and addition of a further 17 mg sodium borohydride (0.446 mmol) the reaction was incomplete by TLC analysis. The suspension was therefore quenched at 0 °C with aqueous ammonium chloride (3 mL), warmed to room temperature over 30 minutes, diluted with water (3 mL) and extracted with Et<sub>2</sub>O (4 × 5 mL). The combined organics were dried (MgSO<sub>4</sub>) and concentrated *in vacuo*. The residue was flushed through a short pad of silica with Et<sub>2</sub>O and the resulting oil was dissolved in THF (0.1 mL) at 0 °C and re-treated with sodium borohydride (17 mg, 0.446 mmol). After stirring for 2 hours at this temperature the reaction was complete so the mixture was quenched and worked-up in the same way as previously. The residue obtained was purified by flash chromatography (SiO<sub>2</sub>, Et<sub>2</sub>O/petrol ether, 1:10 then 1:4) to yield the title compound as a clear oil, 27.8 mg, 91%, *S*:*R* ratio >19:1; δ<sub>H</sub> (400 MHz; CDCl<sub>3</sub>) 7.68 – 7.66 (4H, m, *o*-Ph), 7.44 – 7.33 (6H, m, *m*-Ph, *p*-Ph), 4.84 (1H, d, *J* 7.3, O-10-CH<sub>2</sub>O), 4.67 (1H, d, *J* 7.3, O-10-CH<sub>2</sub>O), 4.64 (1H, d, *J* 6.6, O-8-CH<sub>2</sub>O), 4.62 (1H, d, *J* 6.6, O-8-CH<sub>2</sub>O), 4.26 (1H, ddd, *J* 2.4, 4.2, 10.5, H-8), 4.17 – 4.16 (1H, m (br), H-3), 4.02, (1H, d (br), *J* 6.5, H-7), 3.84 (1H, dd, *J* 4.1, 6.6, H-6), 3.39 (3H, s, O-10-CH<sub>2</sub>OCH<sub>3</sub>), 3.34 (3H, s, O-8-CH<sub>2</sub>OCH<sub>3</sub>), 2.94 – 2.87 (1H, m, H-1), 2.30 – 2.24 (1H, m, H-4), 2.20 (1H, d, *J* 2.2, OH), 1.98 – 1.92 (1H, m, H-5), 1.92 (1H, dd, *J* 10.6, 14.2, H-9), 1.75 (1H, dd, *J* 4.3, 14.2, H-9'), 1.53 (1H, ddd, *J* 4.2, 12.6, 12.6, H-2), 1.46 – 1.41 (1H, m, H-2'), 1.09 – 1.07 (15H, m, H-11, H-12, C(CH<sub>3</sub>)<sub>3</sub>), 0.97 (9H, t, *J* 8.0, SiCH<sub>2</sub>CH<sub>3</sub>), 0.60 (6H, q, *J* 8.0, SiCH<sub>2</sub>CH<sub>3</sub>) [selected NOE contacts: H-7 to H-5, 2.9%; H-7 to H-6, 6.2%; H-7 to H-8, 8.7% enhancement]; δ<sub>C</sub> (100 MHz; CDCl<sub>3</sub>) 135.9 (*o*-Ph), 135.9 (*o*-Ph), 135.0 (*ipso*-Ph), 134.3 (*ipso*-Ph), 129.4 (*p*-Ph), 127.5 (*m*-Ph), 127.4 (*m*-Ph), 95.6 (O-8-CH<sub>2</sub>O), 91.0 (O-10-CH<sub>2</sub>O), 77.7 (C-10), 76.8 (C-7), 75.0 (C-3), 73.6 (C-8), 72.1 (C-6), 55.4, 55.3 (O-10-CH<sub>2</sub>OCH<sub>3</sub> and O-8-CH<sub>2</sub>OCH<sub>3</sub>), 51.9 (C-5), 45.6 (C-1), 44.2 (C-4), 38.6 (C-2), 36.8 (C-9), 29.3 (C-11), 27.1 (C(CH<sub>3</sub>)<sub>3</sub>), 19.5 (C(CH<sub>3</sub>)<sub>3</sub>), 15.5 (C-12), 6.9 (SiCH<sub>2</sub>CH<sub>3</sub>), 4.9 (SiCH<sub>2</sub>CH<sub>3</sub>); ν<sub>max</sub> (film; cm<sup>-1</sup>) 3462w (br), 2952m, 2931m, 2877m, 2325w, 1730w, 1461m, 1428m, 1372m, 1292w, 1239m, 1191m, 1148m, 1128m, 1103s, 1076s, 1039s, 968m, 917m, 878w, 824m, 740m, 701s; [α]<sub>D</sub> +16.2 (*c.* 0.34, CHCl<sub>3</sub>); found (ESI+) [MNa]<sup>+</sup> 709.3951; C<sub>38</sub>H<sub>62</sub>O<sub>7</sub>NaSi<sub>2</sub> requires *M*, 709.3932.



V90037  
 GSKMT3/008/A2  
 Malcolm Tait  
 13C  
 CDC13  
 Position: 58

Current Data Parameters  
 NAME V90037  
 EXPNO 12  
 PROCNO 1  
 F2 - Acquisition Parameters  
 Date\_ 20080931  
 Time 23:17  
 INSTRUM spect  
 PROBR1 49x400  
 PULPROG zgpg30  
 TO 65536  
 SOLVENT CDC13  
 NS 1536  
 DS 4  
 SWH 26178.010 HZ  
 FIDRES 0.399445 HZ  
 AQ 1.2517695 SEC  
 RG 574.7  
 DH 19.100 USEC  
 DE 6.00 USEC  
 TE 300.0 K  
 D1 1.0000000 SEC  
 D11 0.0300000 SEC  
 \*\*\*\*\* CHANNEL f1 \*\*\*\*\*  
 NUC1 13C  
 P1 9.30 USEC  
 PL1 -2.00 DB  
 SFO1 100.626025 MHZ  
 \*\*\*\*\* CHANNEL f2 \*\*\*\*\*  
 CPDPRG2 waltz16  
 NUC2 1H  
 PCPD2 110.00 USEC  
 PL2 0.00 DB  
 PL12 21.00 DB  
 SFO2 400.1320007 MHZ

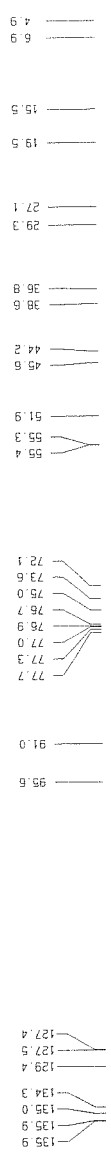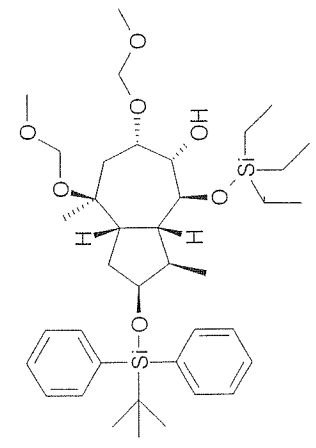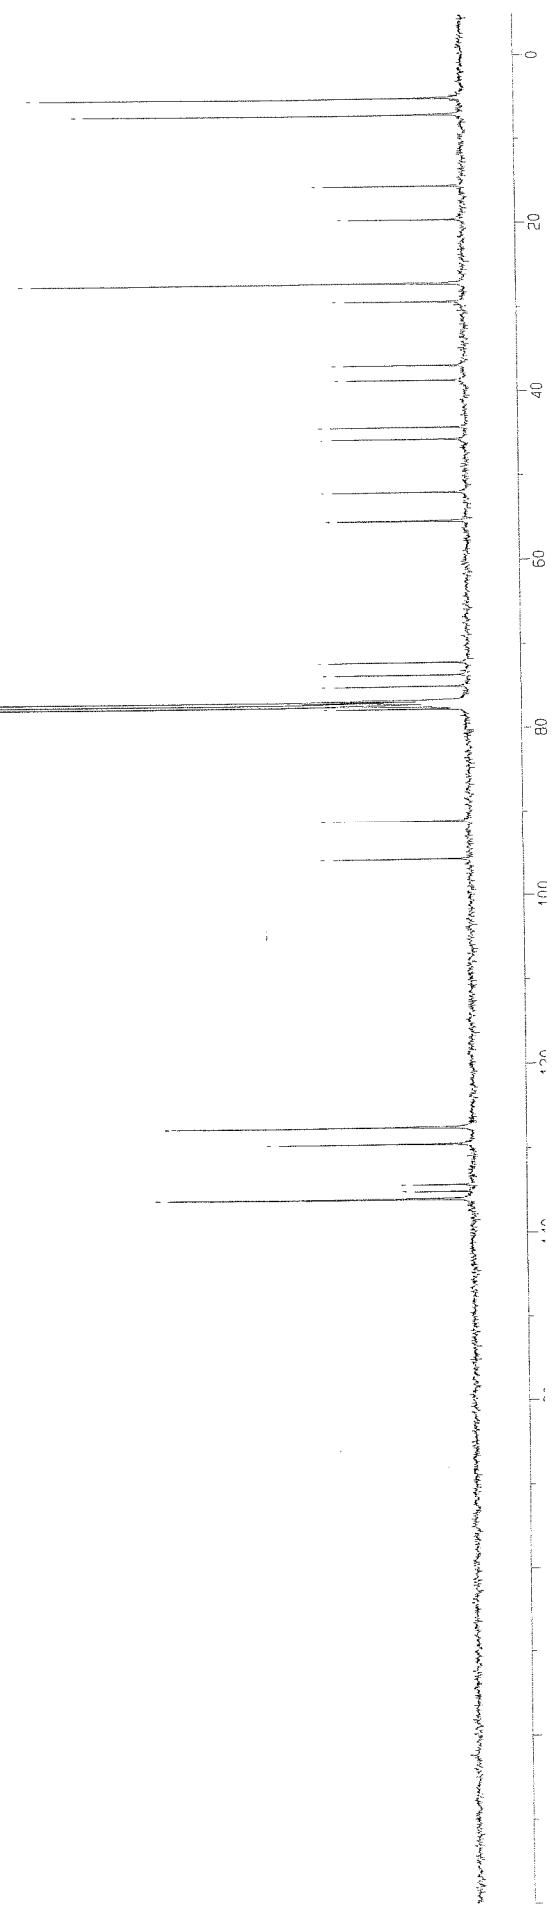

0.51  
0.53  
0.54  
0.55  
0.56  
0.57  
0.58  
0.59  
0.60  
0.61  
0.62  
0.63  
0.64  
0.65  
0.66  
0.67  
0.68  
0.69  
0.70  
0.71  
0.72  
0.73  
0.74  
0.75  
0.76  
0.77  
0.78  
0.79  
0.80  
0.81  
0.82  
0.83  
0.84  
0.85  
0.86  
0.87  
0.88  
0.89  
0.90  
0.91  
0.92  
0.93  
0.94  
0.95  
0.96  
0.97  
0.98  
0.99  
1.00  
1.01  
1.02  
1.03  
1.04  
1.05  
1.06  
1.07  
1.08  
1.09  
1.10  
1.11  
1.12  
1.13  
1.14  
1.15  
1.16  
1.17  
1.18  
1.19  
1.20  
1.21  
1.22  
1.23  
1.24  
1.25  
1.26  
1.27  
1.28  
1.29  
1.30  
1.31  
1.32  
1.33  
1.34  
1.35  
1.36  
1.37  
1.38  
1.39  
1.40  
1.41  
1.42  
1.43  
1.44  
1.45  
1.46  
1.47  
1.48  
1.49  
1.50  
1.51  
1.52  
1.53  
1.54  
1.55  
1.56  
1.57  
1.58  
1.59  
1.60  
1.61  
1.62  
1.63  
1.64  
1.65  
1.66  
1.67  
1.68  
1.69  
1.70  
1.71  
1.72  
1.73  
1.74  
1.75  
1.76  
1.77  
1.78  
1.79  
1.80  
1.81  
1.82  
1.83  
1.84  
1.85  
1.86  
1.87  
1.88  
1.89  
1.90  
1.91  
1.92  
1.93  
1.94  
1.95  
1.96  
1.97  
1.98  
1.99  
2.00  
2.01  
2.02  
2.03  
2.04  
2.05  
2.06  
2.07  
2.08  
2.09  
2.10  
2.11  
2.12  
2.13  
2.14  
2.15  
2.16  
2.17  
2.18  
2.19  
2.20  
2.21  
2.22  
2.23  
2.24  
2.25  
2.26  
2.27  
2.28  
2.29  
2.30  
2.31  
2.32  
2.33  
2.34  
2.35  
2.36  
2.37  
2.38  
2.39  
2.40  
2.41  
2.42  
2.43  
2.44  
2.45  
2.46  
2.47  
2.48  
2.49  
2.50  
2.51  
2.52  
2.53  
2.54  
2.55  
2.56  
2.57  
2.58  
2.59  
2.60  
2.61  
2.62  
2.63  
2.64  
2.65  
2.66  
2.67  
2.68  
2.69  
2.70  
2.71  
2.72  
2.73  
2.74  
2.75  
2.76  
2.77  
2.78  
2.79  
2.80  
2.81  
2.82  
2.83  
2.84  
2.85  
2.86  
2.87  
2.88  
2.89  
2.90  
2.91  
2.92  
2.93  
2.94  
2.95  
2.96  
2.97  
2.98  
2.99  
3.00  
3.01  
3.02  
3.03  
3.04  
3.05  
3.06  
3.07  
3.08  
3.09  
3.10  
3.11  
3.12  
3.13  
3.14  
3.15  
3.16  
3.17  
3.18  
3.19  
3.20  
3.21  
3.22  
3.23  
3.24  
3.25  
3.26  
3.27  
3.28  
3.29  
3.30  
3.31  
3.32  
3.33  
3.34  
3.35  
3.36  
3.37  
3.38  
3.39  
3.40  
3.41  
3.42  
3.43  
3.44  
3.45  
3.46  
3.47  
3.48  
3.49  
3.50  
3.51  
3.52  
3.53  
3.54  
3.55  
3.56  
3.57  
3.58  
3.59  
3.60  
3.61  
3.62  
3.63  
3.64  
3.65  
3.66  
3.67  
3.68  
3.69  
3.70  
3.71  
3.72  
3.73  
3.74  
3.75  
3.76  
3.77  
3.78  
3.79  
3.80  
3.81  
3.82  
3.83  
3.84  
3.85  
3.86  
3.87  
3.88  
3.89  
3.90  
3.91  
3.92  
3.93  
3.94  
3.95  
3.96  
3.97  
3.98  
3.99  
4.00  
4.01  
4.02  
4.03  
4.04  
4.05  
4.06  
4.07  
4.08  
4.09  
4.10  
4.11  
4.12  
4.13  
4.14  
4.15  
4.16  
4.17  
4.18  
4.19  
4.20  
4.21  
4.22  
4.23  
4.24  
4.25  
4.26  
4.27  
4.28  
4.29  
4.30  
4.31  
4.32  
4.33  
4.34  
4.35  
4.36  
4.37  
4.38  
4.39  
4.40  
4.41  
4.42  
4.43  
4.44  
4.45  
4.46  
4.47  
4.48  
4.49  
4.50  
4.51  
4.52  
4.53  
4.54  
4.55  
4.56  
4.57  
4.58  
4.59  
4.60  
4.61  
4.62  
4.63  
4.64  
4.65  
4.66  
4.67  
4.68  
4.69  
4.70  
4.71  
4.72  
4.73  
4.74  
4.75  
4.76  
4.77  
4.78  
4.79  
4.80  
4.81  
4.82  
4.83  
4.84  
4.85  
4.86  
4.87  
4.88  
4.89  
4.90  
4.91  
4.92  
4.93  
4.94  
4.95  
4.96  
4.97  
4.98  
4.99  
5.00  
5.01  
5.02  
5.03  
5.04  
5.05  
5.06  
5.07  
5.08  
5.09  
5.10  
5.11  
5.12  
5.13  
5.14  
5.15  
5.16  
5.17  
5.18  
5.19  
5.20  
5.21  
5.22  
5.23  
5.24  
5.25  
5.26  
5.27  
5.28  
5.29  
5.30  
5.31  
5.32  
5.33  
5.34  
5.35  
5.36  
5.37  
5.38  
5.39  
5.40  
5.41  
5.42  
5.43  
5.44  
5.45  
5.46  
5.47  
5.48  
5.49  
5.50  
5.51  
5.52  
5.53  
5.54  
5.55  
5.56  
5.57  
5.58  
5.59  
5.60  
5.61  
5.62  
5.63  
5.64  
5.65  
5.66  
5.67  
5.68  
5.69  
5.70  
5.71  
5.72  
5.73  
5.74  
5.75  
5.76  
5.77  
5.78  
5.79  
5.80  
5.81  
5.82  
5.83  
5.84  
5.85  
5.86  
5.87  
5.88  
5.89  
5.90  
5.91  
5.92  
5.93  
5.94  
5.95  
5.96  
5.97  
5.98  
5.99  
6.00  
6.01  
6.02  
6.03  
6.04  
6.05  
6.06  
6.07  
6.08  
6.09  
6.10  
6.11  
6.12  
6.13  
6.14  
6.15  
6.16  
6.17  
6.18  
6.19  
6.20  
6.21  
6.22  
6.23  
6.24  
6.25  
6.26  
6.27  
6.28  
6.29  
6.30  
6.31  
6.32  
6.33  
6.34  
6.35  
6.36  
6.37  
6.38  
6.39  
6.40  
6.41  
6.42  
6.43  
6.44  
6.45  
6.46  
6.47  
6.48  
6.49  
6.50  
6.51  
6.52  
6.53  
6.54  
6.55  
6.56  
6.57  
6.58  
6.59  
6.60  
6.61  
6.62  
6.63  
6.64  
6.65  
6.66  
6.67  
6.68  
6.69  
6.70  
6.71  
6.72  
6.73  
6.74  
6.75  
6.76  
6.77  
6.78  
6.79  
6.80  
6.81  
6.82  
6.83  
6.84  
6.85  
6.86  
6.87  
6.88  
6.89  
6.90  
6.91  
6.92  
6.93  
6.94  
6.95  
6.96  
6.97  
6.98  
6.99  
7.00  
7.01  
7.02  
7.03  
7.04  
7.05  
7.06  
7.07  
7.08  
7.09  
7.10  
7.11  
7.12  
7.13  
7.14  
7.15  
7.16  
7.17  
7.18  
7.19  
7.20  
7.21  
7.22  
7.23  
7.24  
7.25  
7.26  
7.27  
7.28  
7.29  
7.30  
7.31  
7.32  
7.33  
7.34  
7.35  
7.36  
7.37  
7.38  
7.39  
7.40  
7.41  
7.42  
7.43  
7.44  
7.45  
7.46  
7.47  
7.48  
7.49  
7.50  
7.51  
7.52  
7.53  
7.54  
7.55  
7.56  
7.57  
7.58  
7.59  
7.60  
7.61  
7.62  
7.63  
7.64  
7.65  
7.66  
7.67  
7.68  
7.69  
7.70  
7.71  
7.72  
7.73  
7.74  
7.75  
7.76  
7.77  
7.78  
7.79  
7.80  
7.81  
7.82  
7.83  
7.84  
7.85  
7.86  
7.87  
7.88  
7.89  
7.90  
7.91  
7.92  
7.93  
7.94  
7.95  
7.96  
7.97  
7.98  
7.99  
8.00

OSKMT2/05/143  
Meligolm Tait,  
IH  
GD013  
Position: 51

Current Data Parameters  
NAME W58471  
EXPNO 10  
PROCNO 1  
F2 - Acquisition Parameters  
Date\_ 20050829  
Time 18:21  
INSTRUM dx400  
PROBHD 5 mm QNP 1H  
PULPROG zg30  
TD 32768  
SOLVENT CDCl3  
NS 12  
DS 2  
SWH 5223.885 Hz  
FIDRES 0.250957 Hz  
AQ 1.992444 sec  
RG 362  
GB 0  
DN 60.800 usec  
DC 6.00 usec  
BC 360.0 X  
LE 1  
D: 1.0000000 sec

\*\*\*\*\* CHANNEL f1 \*\*\*\*\*  
NUC1 1H  
P1 9.40 usec  
PL1 0.00 dB  
SFO1 400.1324710 MHz  
F2 - Processing parameters  
SI 32768  
SF 400.1320095 MHz  
WDW EM  
SSB 0  
LB 0.30 Hz  
GB 0  
PC 1.00  
TD 65536  
FIDRES 0.250957 Hz  
AQ 1.992444 sec  
RG 362  
GB 0  
DN 60.800 usec  
DC 6.00 usec  
BC 360.0 X  
LE 1  
D: 1.0000000 sec

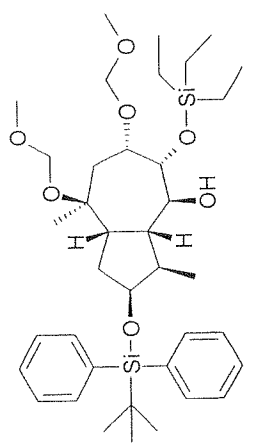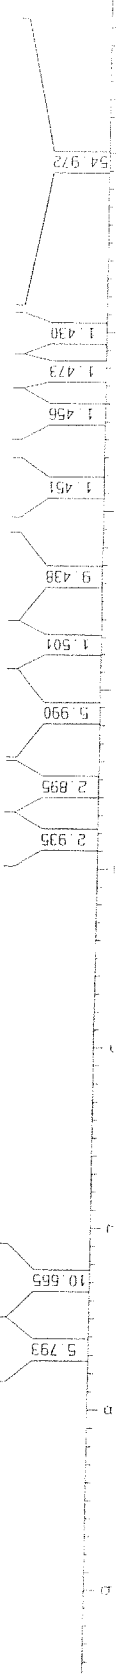

785471  
 GSKM1240517A3  
 Malicim T311  
 13C  
 CDC13  
 POSITION: 51

Current Data Parameters  
 NAME: 785471  
 EXPNO: 12  
 PROCNO: 1  
 Data\_ 20550029  
 Time: 19:40  
 INSTRUM: spect  
 PROBHD: 5 mm QNP 1H  
 PULPROG: zgpg30  
 TO: 65436  
 SOLVENT: DMSO-d6  
 NS: 1036  
 DS: 4  
 SWH: 48178.010 Hz  
 FIDRES: 0.39945 Hz  
 AQ: 1.2517875 sec  
 RG: 3280.0  
 SM: 1  
 SI: 13  
 SF: 100.626125 MHz  
 SFO2: 300.13 K  
 C1: 1.00000000 sec  
 C11: 0.50000000 sec

===== CHANNEL f1 =====  
 NUC1: 13C  
 P1: 5.20 usec  
 PL1: 2.00 dB  
 SFO1: 100.626125 MHz

===== CHANNEL f2 =====  
 CPDPRG2: waltz16  
 NUC2: 1H  
 PCPD2: 110.00 usec  
 PL2: 0.00 dB  
 PL12: 21.00 dB  
 SFO2: 400.126007 MHz

F2 - Processing parameters  
 SI: 65536  
 SF: 500.132763 MHz  
 WDW: EM  
 SSB: 0  
 LB: 2.00 Hz  
 GB: 0  
 PC: 1.40

1D NMR D1-C13 Parameters  
 CX: 35.00 cm  
 CY: 14.00 cm  
 F1F: 330.000 MHz  
 F2F: 20134.81 MHz  
 F3F: 500.130 MHz  
 F4F: 450.135 MHz  
 PRPNCM: 6.42263 MHz/cm  
 RUCM: 646.28333 MHz/cm

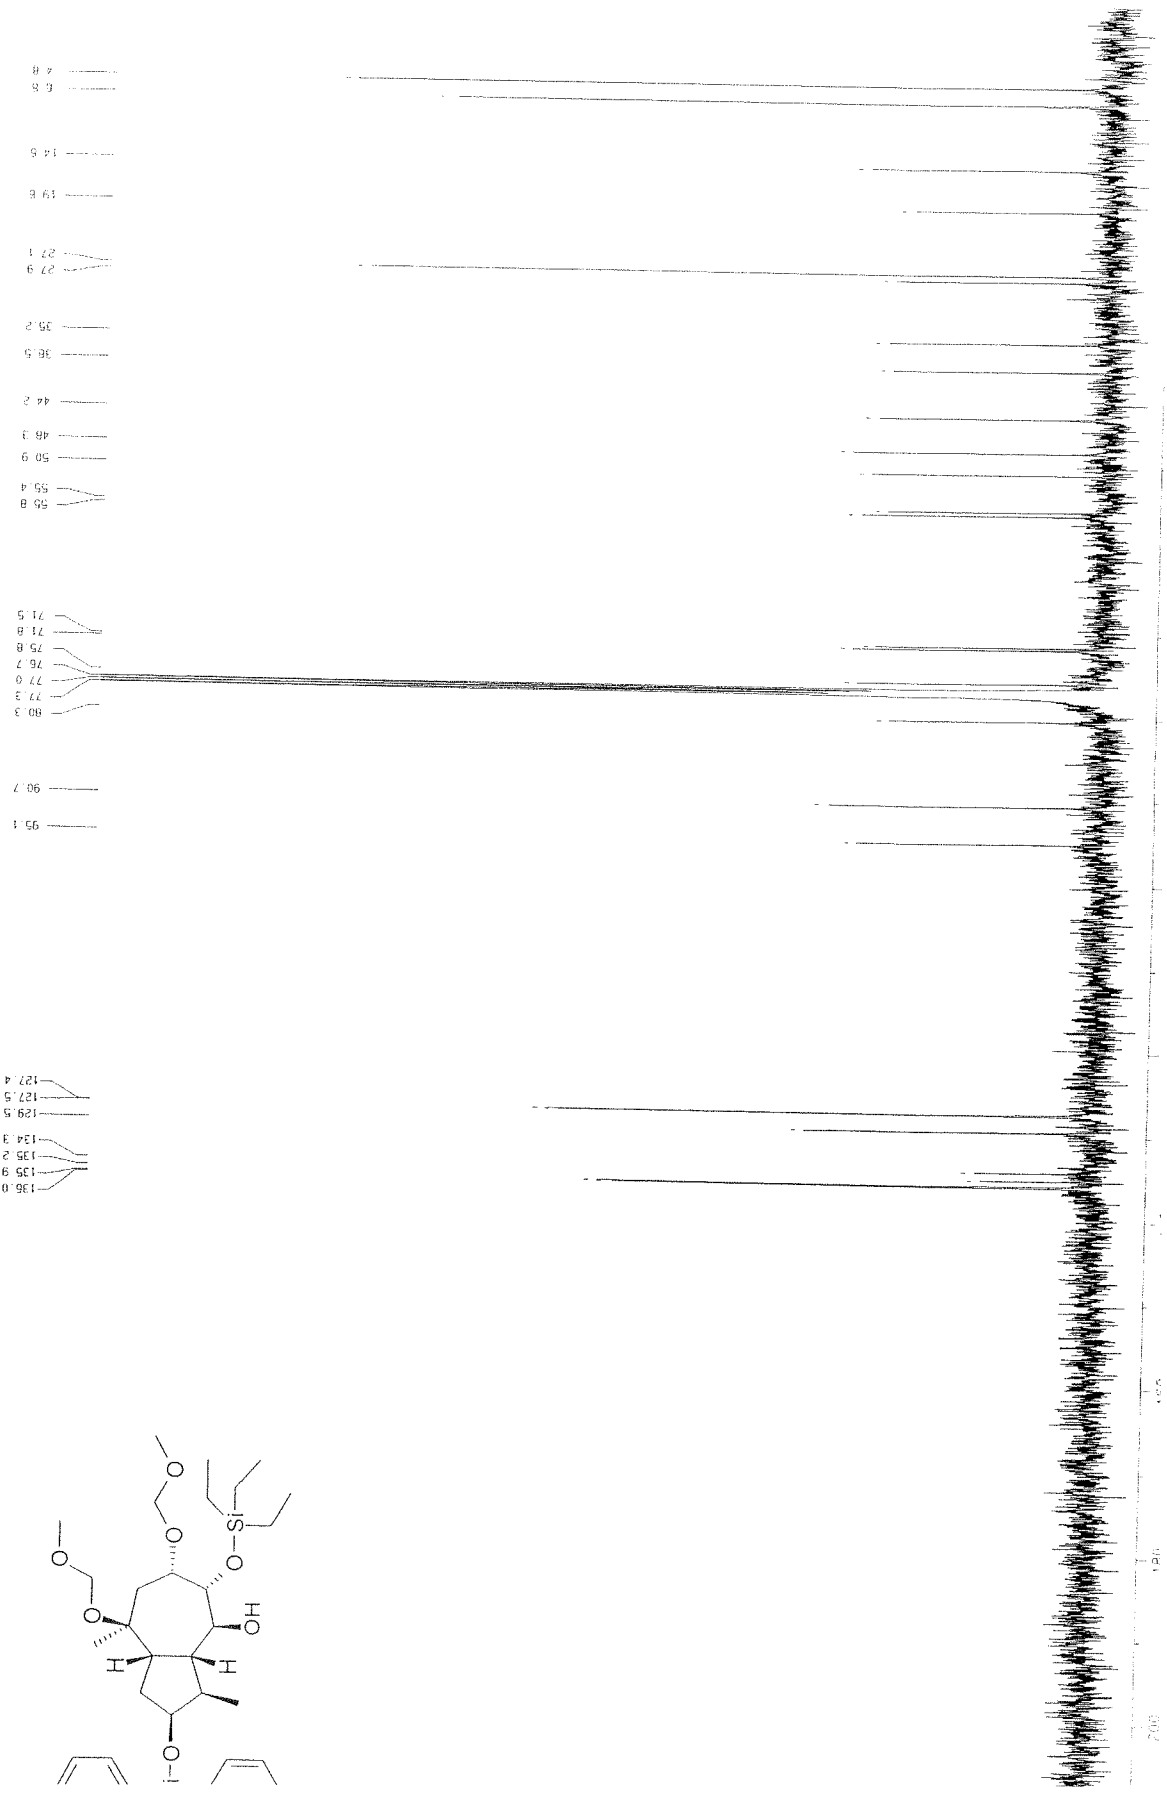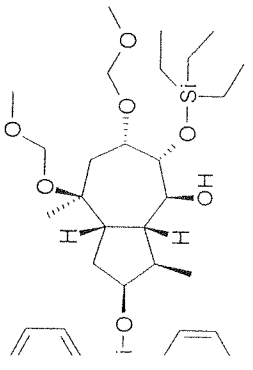

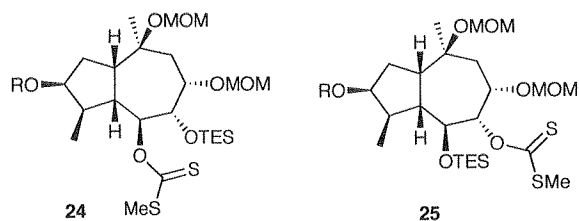

**Xanthates 24 and 25:** Carbon disulfide (1.8  $\mu\text{L}$ , 0.0312 mmol) was added to a solution of alcohol **23** (7.2 mg, 0.0104 mmol) in THF (0.3 mL) at  $-78\text{ }^{\circ}\text{C}$ . After stirring at this temperature for 30 minutes the mixture was treated dropwise with NaHMDS (11.4  $\mu\text{L}$  of a 1 M solution in THF, 0.0114 mmol). The resulting yellow solution was stirred for 50 minutes then treated with MeI (3.2  $\mu\text{L}$ , 0.0520 mmol) and stirred for a further 2 hours. After this time the reaction mixture was quenched at  $-78\text{ }^{\circ}\text{C}$  with aqueous ammonium chloride (0.5 mL) then allowed to warm to room temperature over 40 minutes. After diluting with water (5 mL) the mixture was extracted with EtOAc ( $3 \times 5\text{ mL}$ ). The combined organics were dried ( $\text{MgSO}_4$ ) and concentrated *in vacuo* to a yellow oil. This was purified by flash chromatography ( $\text{SiO}_2$ ,  $\text{Et}_2\text{O}$ /petrol ether, 1:4) to yield a mixture of the title compounds as a clear oil, 7.8 mg, 96%, 3.1:1 ratio of 2 components by  $^1\text{H}$  NMR. This was used crude in the next step.

The xanthates were tentatively assigned as **24** and **25**. Key signals:  $\delta_{\text{H}}$  (400 MHz;  $\text{CDCl}_3$ ) 6.02 (major component, 1H, d,  $J$  4.0, H-6 or H-7), 5.86 (minor component, 1H, d,  $J$  4.0, H-6 or H-7), 2.58 (minor component, 3H, s,  $\text{OC}(\text{S})\text{SCH}_3$ ), 2.51 (major component, 3H, s,  $\text{OC}(\text{S})\text{SCH}_3$ ).







Y858105  
 GSKM27054742  
 Maltodim Tail  
 13C  
 00013  
 POSITION: 29

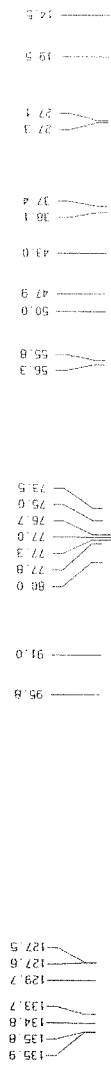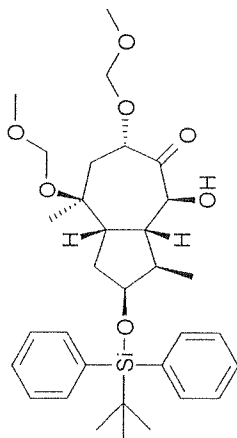

Current Data Parameters  
 NAME Y858105  
 EXPNO 12  
 PROCNO 1  
 F2 - Acquisition Parameters  
 Date\_ 20060918  
 Time 19:30  
 INSTRUM spect  
 PROBR1 5 mm QNP 1H  
 PULPROG zgpg30  
 IC 200000  
 SFO1 100.6248035 MHz  
 SOLVENT CDCl3  
 NS 1536  
 DS 4  
 SWH 20178.010 Hz  
 FIDRES 0.356948 Hz  
 AQ 1.2517875 sec  
 RG 612  
 BR 1.0  
 SFO2 101.6248035 MHz  
 DE 5.00 usec  
 TE 300.2 K  
 D1 1.00000000 sec  
 D11 0.03000000 sec  
 ===== CHANNEL f1 =====  
 NUC1 13C  
 P1 9.36 usec  
 PL -2.00 dB  
 SFO1 100.6248035 MHz  
 ===== CHANNEL f2 =====  
 CPDPRG2 waltz16  
 NUC2 1H  
 P2 110.00 usec  
 PL2 0.00 dB  
 PL12 21.00 dB  
 SFO2 400.1326007 MHz  
 F2 - Processing parameters  
 SI 85536  
 SF 100.6127087 MHz  
 NDA 8K  
 SSB 0  
 LB 3.00 Hz  
 GB 0  
 PC 1.40  
 ID NMR Plot Parameters  
 X1 35.00 cm  
 Y1 10.00 cm  
 F1P 320.000 DPH  
 F2P 22134.81 Hz  
 ZP -5.000 DPH  
 SFO 400.1326007 MHz  
 PPH0K 8.42887 DPH/cm  
 WCOM 846.79633 Hz/cm

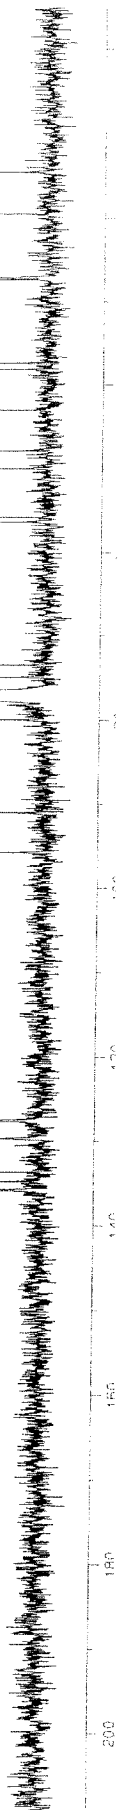

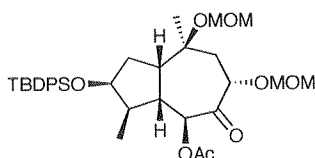

**O-6 Acetoxy derivative of 14:** A solution of alcohol **14** (10.3 mg, 0.018 mmol) in  $\text{CH}_2\text{Cl}_2$  (1 mL) was treated with acetic anhydride (20  $\mu\text{L}$ , 0.207 mmol), pyridine (20  $\mu\text{L}$ , 0.252 mmol) and DMAP (1 granule). The solution was stirred at room temperature for 37.5 hours to leave a yellow solution which was quenched with aqueous ammonium chloride (5 mL). This mixture was extracted with  $\text{CH}_2\text{Cl}_2$  (3 x 10 mL) then the combined organics were washed with brine (5 mL), dried ( $\text{MgSO}_4$ ) and concentrated *in vacuo* to a yellow oil. This was purified by flash chromatography ( $\text{SiO}_2$ ,  $\text{Et}_2\text{O}$ /petrol ether, 1:2) to yield the title compound as a clear oil, 10.1 mg, 91%;  $\delta_{\text{H}}$  (400 MHz;  $\text{CDCl}_3$ ) 7.66 – 7.63 (4H, m, *o*-Ph), 7.45 – 7.34 (6H, m, *m*-Ph, *p*-Ph), 4.99 (1H, d,  $J$  10.3, H-6), 4.69 (1H, d,  $J$  7.3, O-10- $\text{CH}_2\text{O}$ ), 4.61 (1H, d,  $J$  7.3, O-10- $\text{CH}_2\text{O}$ ), 4.56 (1H, d,  $J$  6.8, O-8- $\text{CH}_2\text{O}$ ), 4.51 (1H, d,  $J$  6.8, O-8- $\text{CH}_2\text{O}$ ), 4.31 – 4.28 (1H, m (br), H-3), 4.19 (1H, dd,  $J$  7.5, 10.1, H-8), 3.32 (6H, s,  $\text{OCH}_2\text{OCH}_3$ ), 2.92 (1H, ddd,  $J$  7.6, 7.6, 12.9, H-1), 2.13 (1H, dd,  $J$  7.4, 14.6, H-9), 2.08 (3H, s,  $\text{C}(\text{O})\text{CH}_3$ ), 2.08 – 1.95 (2H, m, H-4, H-5), 1.83 (1H, dd,  $J$  10.1, 14.6, H-9'), 1.57 – 1.52 (1H, m, H-2), 1.45 (1H, ddd,  $J$  5.5, 12.8, 12.8, H-2'), 1.17 (3H, s, H-13), 1.14 (3H, d,  $J$  7.1, H-14), 1.08 (9H, s,  $\text{C}(\text{CH}_3)_3$ );  $\delta_{\text{C}}$  (100 MHz;  $\text{CDCl}_3$ ) 202.4 (C-7), 170.0 (C-12), 135.9 (*o*-Ph), 135.8 (*o*-Ph), 134.5 (*ipso*-Ph), 133.8 (*ipso*-Ph), 129.7 (*p*-Ph), 127.6 (*m*-Ph), 94.8 (O-8- $\text{CH}_2\text{O}$ ), 90.6 (O-10- $\text{CH}_2\text{O}$ ), 77.8 (C-10), 76.9 (C-6), 74.2 (C-8), 73.8 (C-3), 56.0, 55.8 (O-8- $\text{CH}_2\text{OCH}_3$ /O-10- $\text{CH}_2\text{OCH}_3$ ), 47.9 (C-5), 46.3 (C-1), 43.9 (C-4), 37.1 (C-2), 36.5 (C-9), 27.8 (C-13), 27.1 ( $\text{C}(\text{CH}_3)_3$ ), 20.6 ( $\text{C}(\text{O})\text{CH}_3$ ), 19.4 ( $\text{C}(\text{CH}_3)_3$ ), 15.6 (C-14);  $\nu_{\text{max}}$  (film;  $\text{cm}^{-1}$ ) 2932m, 2857m, 1748m, 1733m, 1460m, 1429m, 1377m, 1253m, 1227m, 1147m, 1104m, 1021s, 943m, 920m, 823w, 742m, 703s;  $[\alpha]_{\text{D}} -8.4$  ( $c$  0.49,  $\text{CHCl}_3$ ); found (ESI+)  $[\text{MNa}]^+$  635.3013;  $\text{C}_{34}\text{H}_{48}\text{O}_8\text{NaSi}$  requires  $M$ , 635.3016.

0.05  
0.06  
0.07  
0.88  
1.05  
1.06  
1.06  
1.13  
1.15  
1.17  
1.19  
1.21  
1.21  
1.26  
1.43  
1.45  
1.54  
1.55  
1.57  
1.80  
1.82  
1.84  
1.86  
2.00  
2.05  
2.08  
2.10  
2.12  
2.15  
2.90  
2.93  
3.32  
3.34  
3.49  
4.16  
4.18  
4.19  
4.21  
4.28  
4.29  
4.30  
4.31  
4.49  
4.51  
4.55  
4.57  
4.60  
4.62  
4.68  
4.70  
4.98  
5.00  
5.16  
5.30  
5.46  
6.98  
7.26  
7.35  
7.36  
7.37  
7.38  
7.39  
7.41  
7.43  
7.63  
7.63  
7.64  
7.64  
7.65  
7.65  
7.66  
7.83

VB9170  
GSKMT27066/A42  
Malcolm Tait  
1H  
CDCl3  
Position: 30

Current Data Parameters  
 NAME VB9170  
 EXPNO 10  
 PROCNO 1

F2 - Acquisition Parameters  
 Date\_ 20060725  
 Time 23.19  
 INSTRUM cpk400  
 PROBHD 5 mm QNP 1H  
 PULPROG zg30  
 TD 32768  
 SOLVENT CDCl3  
 NS 16  
 DS 2  
 SWH 6223.665 Hz  
 FIDRES 0.350967 Hz  
 AQ 1.9923444 sec  
 RG 40  
 362  
 DK 60.800 usec  
 DE 6.00 usec  
 TE 300.0 K  
 D1 1.00000000 sec

===== CHANNEL f1 =====  
 NUC1 1H  
 P1 9.40 usec  
 PL1 0.00 dB  
 SFO1 400.1324710 MHz

F2 - Processing parameters  
 SI 32768  
 SF 400.1330052 MHz  
 WGM EM  
 SSB 0  
 LB 0.30 Hz  
 GB 0  
 PC 1.00

1D NMR plot parameters  
 CX 35.00 cm  
 CY 40.00 cm  
 FIP 10.000 ppm  
 F1 -4061.30 Hz  
 F2 -2003.07 Hz  
 PRGCM 0.30000 2000/cm  
 RECK 120.03500 Hz/cm

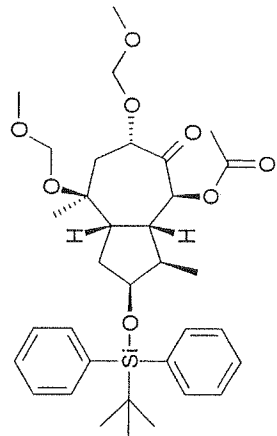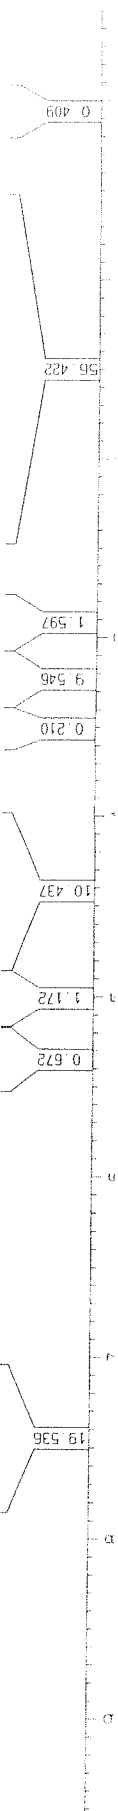

V89170  
 GSM1270667A2  
 Malcoim Tait  
 13C  
 CDCl3  
 Position: 30

Current Data Parameters  
 NAME V89170  
 EXPNO 12  
 PROCNO 1  
 F2 - Acquisition Parameters  
 Date\_ 20060726  
 Time 0.38  
 INSTRUM 904-400  
 PROBDW 5 mm QNP 1H  
 PULPROG zgpg30  
 TO 65336  
 SOLVENT CDCl3  
 NS 1536  
 DS 4  
 SWH 26178.010 Hz  
 FIDRES 0.399445 Hz  
 AQ 1.2517875 sec  
 RG 157.7  
 DM 19.100 usec  
 DE 6.00 usec  
 TE 300.0 K  
 TC 1.00000000 sec  
 C11 0.02000000 sec

\*\*\*\*\* CHANNEL f1 \*\*\*\*\*  
 NUC1 13C  
 P1 9.30 usec  
 PL1 -2.00 dB  
 SFO1 100.62648625 MHz

\*\*\*\*\* CHANNEL f2 \*\*\*\*\*  
 CPDPRG2 waltz16  
 NUC2 1H  
 P2P2 110.00 usec  
 PL2 0.00 dB  
 SFO2 400.132607 MHz

F2 - Processing parameters  
 S1 65536  
 SF 100.6127701 MHz  
 WDW EM  
 SSB 0  
 LB 3.00 Hz  
 GB 0  
 PC 1.40

1D NMR Plot Parameters  
 CX 25.00 cm  
 C1 10.00 cm  
 F1P 249.084 dBm  
 F2P 25121.43 Hz  
 ZP -10.501 dBm  
 FZ -1056.98 Hz  
 GAMMA 7.43268 dBm/cm  
 -LCA 747.94324 Hz/cm

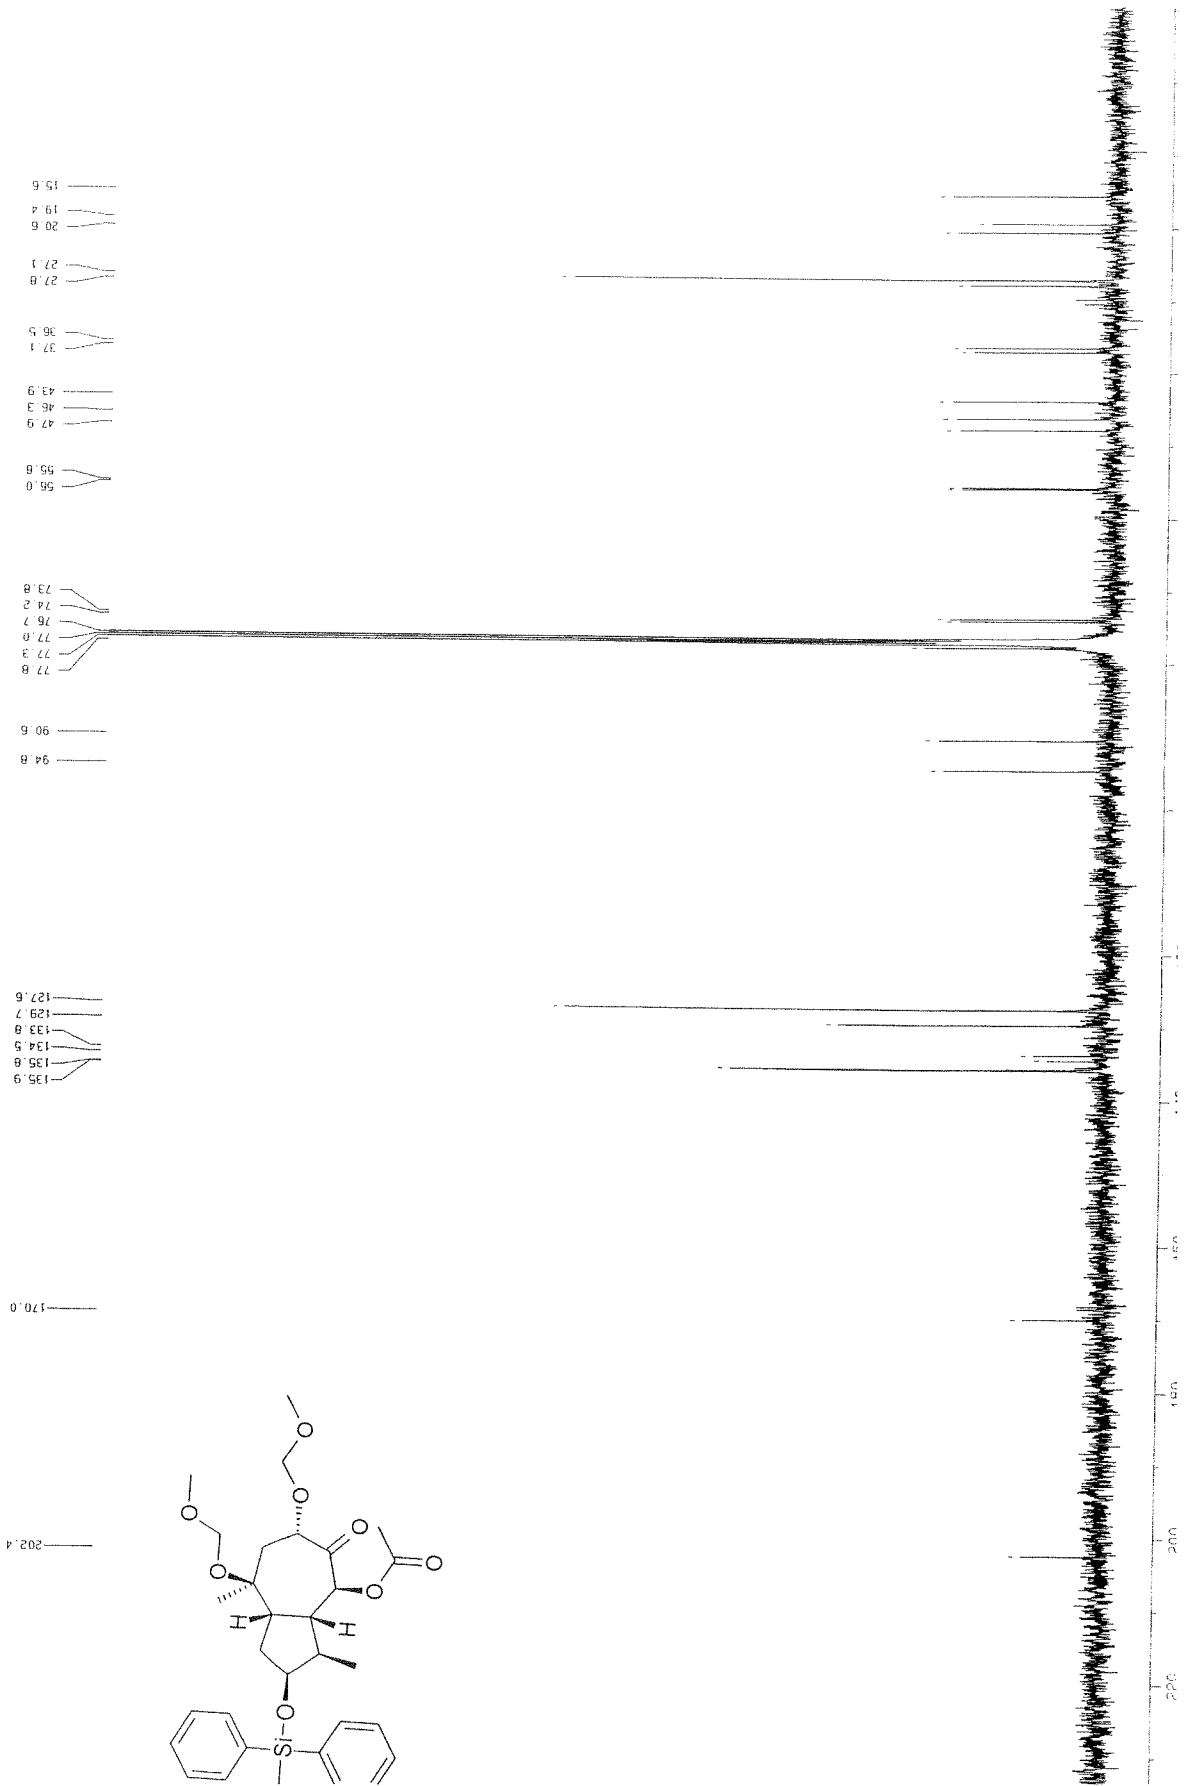

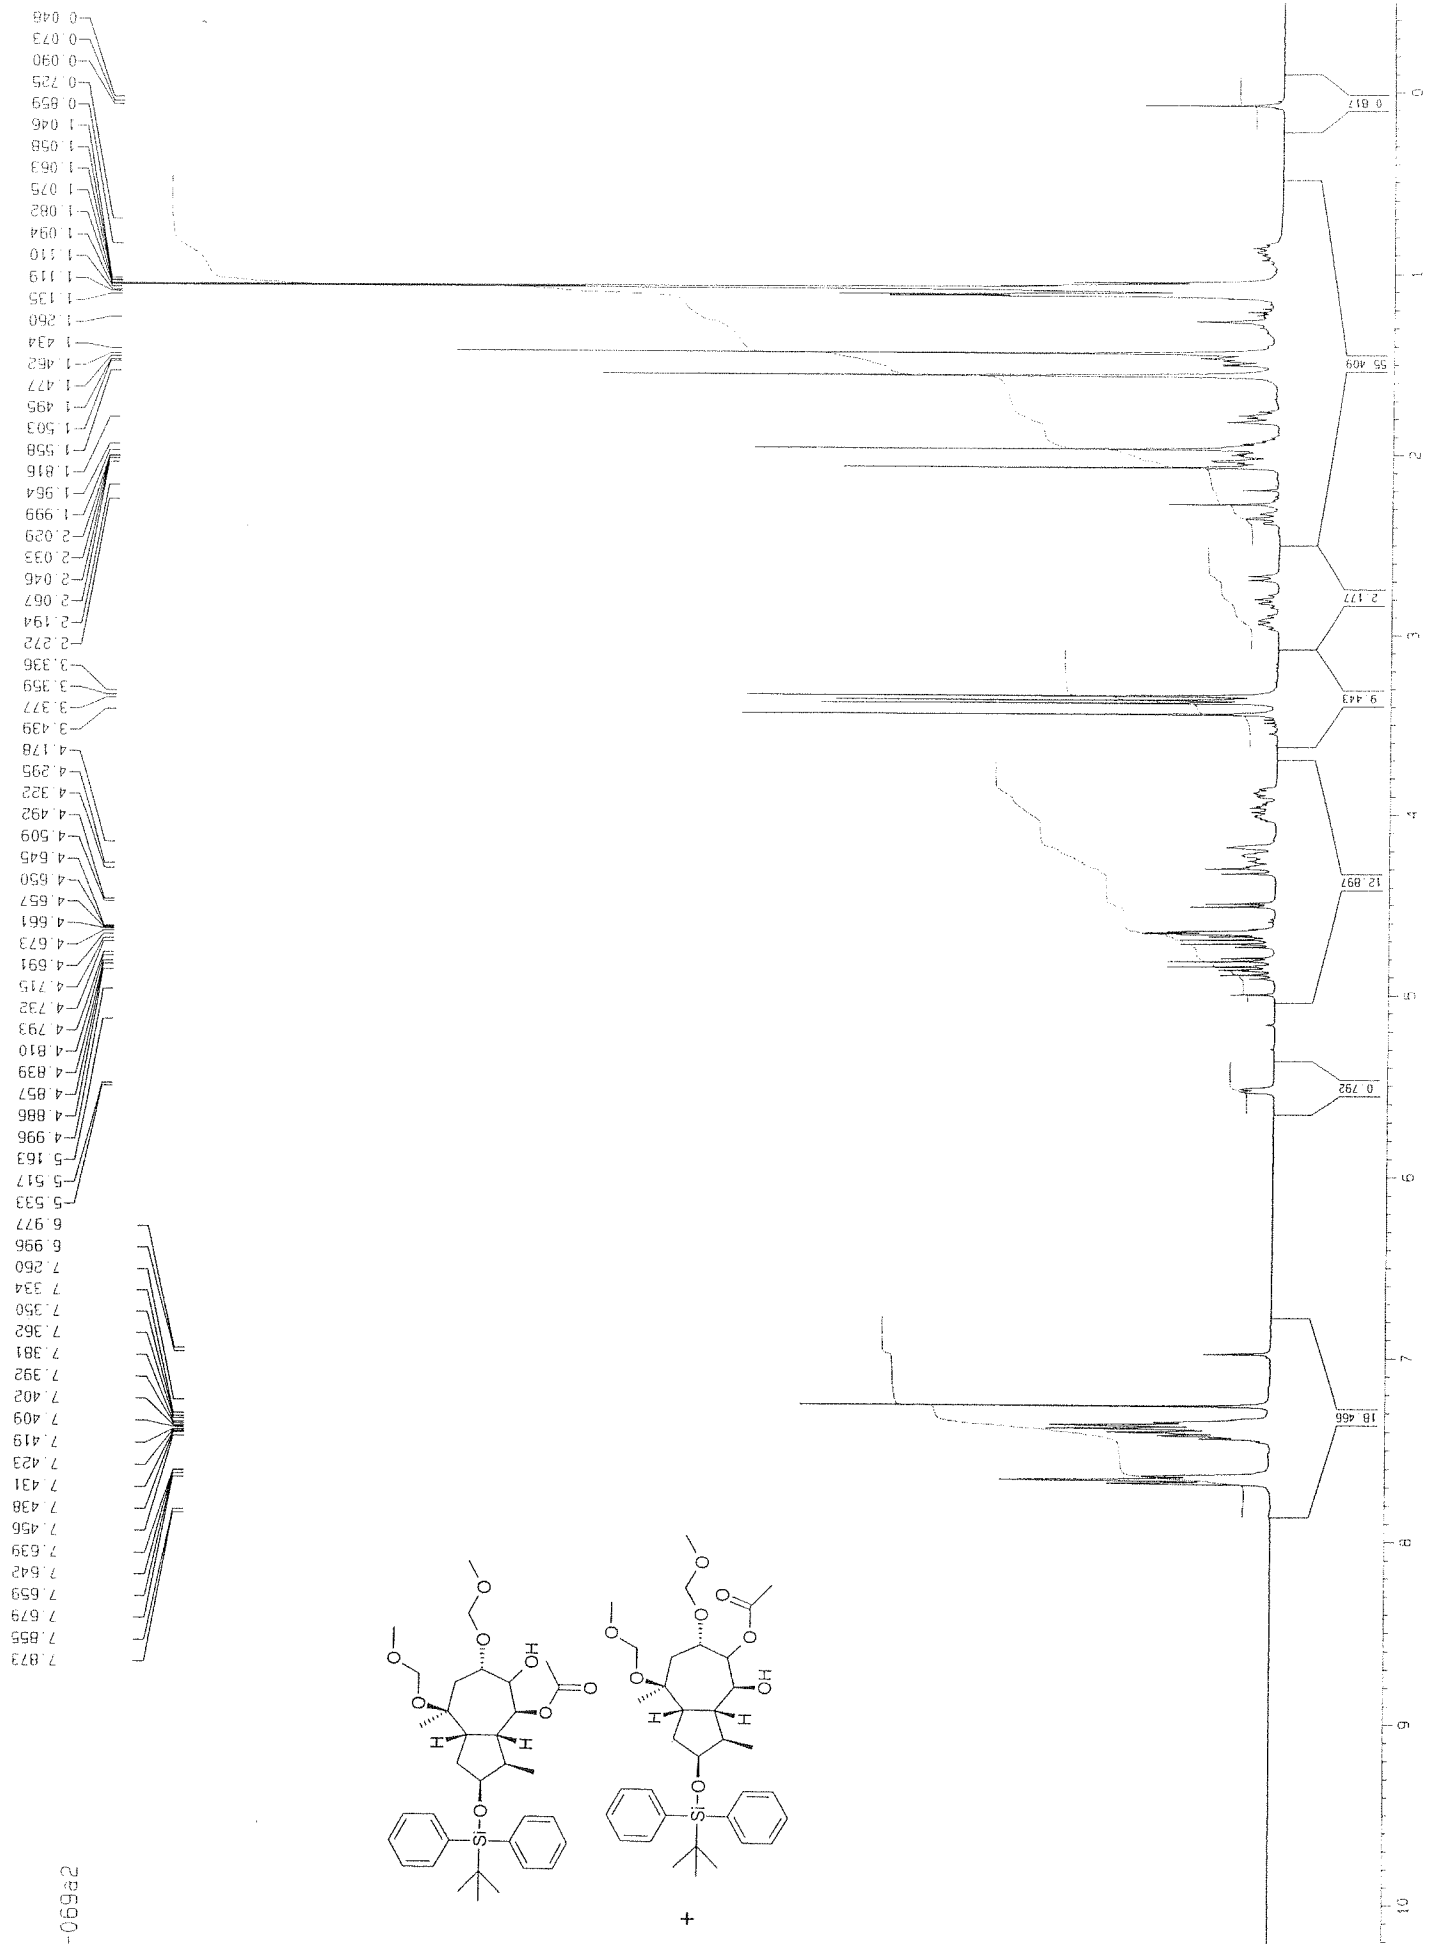

0659a2

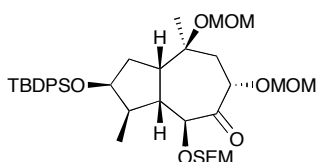

26

**SEM acetal 26:** A solution of alcohol **14** (901 mg, 1.58 mmol) in  $\text{CH}_2\text{Cl}_2$  (16 mL) at  $0^\circ\text{C}$  was treated with DIPEA (4.33 mL, 24.85 mmol) then SEM-Cl (2.51 mL, 14.20 mmol). The mixture was warmed to room temperature then DMAP (10 granules) was added and the mixture stirred for 15 hours. After this time the reaction mixture was partitioned between water (30 mL) and EtOAc (50 mL). The aqueous layer was extracted with EtOAc ( $3 \times 50$  mL) then the combined organics were washed with brine (50 mL), dried ( $\text{MgSO}_4$ ) and concentrated *in vacuo* to a yellow oil. This was purified by flash chromatography ( $\text{SiO}_2$ ,  $\text{Et}_2\text{O}$ /petrol ether, neat petrol then 1:19 to 1:1) to yield the title compound as a clear oil, 883 mg, 80%;  $\delta_{\text{H}}$  (400 MHz;  $\text{CDCl}_3$ ) 7.67 – 7.64 (4H, m, *o*-Ph), 7.45 – 7.34 (6H, m, *m*-Ph, *p*-Ph), 4.68 (1H, d,  $J$  7.3, O-10- $\text{CH}_2\text{O}$ ), 4.64 (1H, d,  $J$  7.4, O-10- $\text{CH}_2\text{O}$ ), 4.62 (1H, d,  $J$  6.8, O-8- $\text{CH}_2\text{O}$ ), 4.55 (1H, d,  $J$  7.1, O-6- $\text{CH}_2\text{O}$ ), 4.51 (1H, d,  $J$  6.7, O-8- $\text{CH}_2\text{O}$ ), 4.46 (1H, d,  $J$  7.1, O-6- $\text{CH}_2\text{O}$ ), 4.30 – 4.26 (1H, m, H-3), 4.24 (1H, dd,  $J$  7.5, 10.0, H-8), 4.17 (1H, d,  $J$  9.7, H-6), 3.63 – 3.52 (2H, m,  $\text{SiCH}_2\text{CH}_2$ ), 3.33 (3H, s, O-10- $\text{CH}_2\text{OCH}_3$ ), 3.32 (3H, s, O-8- $\text{CH}_2\text{OCH}_3$ ), 2.90 (1H, ddd (br),  $J$  7.4, 7.4, 12.8, H-1), 2.18 – 2.08 (2H, m, H-4, H-9), 1.95 (1H, ddd,  $J$  4.4, 9.3, 9.3, H-5), 1.74 (1H, dd,  $J$  10.4, 14.4, H-9'), 1.49 (1H, ddd,  $J$  1.6, 6.7, 12.9, H-2), 1.39 (1H, ddd,  $J$  5.1, 12.9, 12.9, H-2'), 1.16 (3H, d,  $J$  7.1, H-12), 1.13 (3H, s, H-11), 1.08 (9H, s,  $\text{C}(\text{CH}_3)_3$ ), 0.86 – 0.81 (2H, m,  $\text{SiCH}_2\text{CH}_2$ ), -0.01 (9H, s,  $\text{Si}(\text{CH}_3)_3$ );  $\delta_{\text{C}}$  (100 MHz;  $\text{CDCl}_3$ ) 205.8 (C-7), 135.9 (*o*-Ph), 135.8 (*o*-Ph), 134.7 (*ipso*-Ph), 133.8 (*ipso*-Ph), 129.6 (*p*-Ph), 127.6 (*m*-Ph), 127.5 (*m*-Ph), 95.3 (O-8- $\text{CH}_2\text{O}$ ), 94.4 (O-6- $\text{CH}_2\text{O}$ ), 90.6 (O-10- $\text{CH}_2\text{O}$ ), 80.0 (C-6), 78.1 (C-10), 75.4 (C-8), 74.1 (C-3), 65.7 ( $\text{SiCH}_2\text{CH}_2$ ), 56.1 (O-10- $\text{CH}_2\text{OCH}_3$ ), 55.7 (O-8- $\text{CH}_2\text{OCH}_3$ ), 49.4 (C-5), 46.3 (C-1), 44.2 (C-4), 37.6 (C-2), 36.8 (C-9), 27.9 (C-11), 27.0 ( $\text{C}(\text{CH}_3)_3$ ), 19.4 ( $\text{C}(\text{CH}_3)_3$ ), 18.0 ( $\text{SiCH}_2\text{CH}_2$ ), 15.8 (C-12), -1.5 ( $\text{Si}(\text{CH}_3)_3$ );  $\nu_{\text{max}}$  (film;  $\text{cm}^{-1}$ ) 2948m, 2931m, 2983, 1731m, 1473, 1428m, 1376m, 1249m, 1193m, 1148m, 1106s, 1027s, 939m, 920m, 860m, 836m, 741m, 702m;  $[\alpha]_{\text{D}} - 4.5$  (*c.* 0.33,  $\text{CHCl}_3$ ); found (ESI+)  $[\text{MNa}]^+$  723.3688;  $\text{C}_{38}\text{H}_{60}\text{O}_8\text{NaSi}_2$  requires  $M$ , 723.3724.

7.84  
7.67  
7.65  
7.65  
7.64  
7.43  
7.42  
7.40  
7.40  
7.39  
7.38  
7.37  
7.37  
7.36  
7.36  
7.26  
7.00  
5.98  
5.29  
5.19  
5.17  
4.82  
4.69  
4.67  
4.64  
4.63  
4.61  
4.56  
4.54  
4.52  
4.50  
4.47  
4.45  
4.29  
4.26  
4.25  
4.24  
4.19  
4.16  
3.60  
3.59  
3.58  
3.57  
3.57  
3.56  
3.55  
3.33  
3.32  
2.14  
2.12  
2.10  
1.77  
1.74  
1.73  
1.50  
1.17  
1.15  
1.13  
1.06  
1.05  
0.86  
0.85  
0.84  
0.84  
0.83  
0.81  
0.80  
0.80  
0.81  
0.91  
0.92

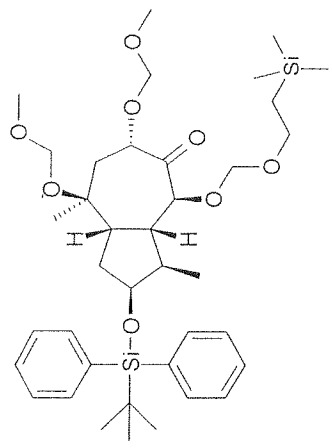

Current Data Parameters  
 NAME V83995  
 EXPNO 10  
 PROCNO 1  
 F2 - Acquisition Parameters  
 Date\_ 20060611  
 Time 1:53  
 INSTRUM cpd400  
 PROBRG 5 mm ZNP 1H  
 PULPROG zgpg30  
 TO 32768  
 SOLVENT CDCl3  
 NS 16  
 DS 2  
 SWH 8023.885 Hz  
 FIDRES 0.250857 Hz  
 40 1.952344 sec  
 RG 181  
 Acq 181  
 SFO 50.800 MHz  
 BE 6.00 Usec  
 TE 300.0 K  
 D1 1.00000000 sec

===== CHANNEL f1 =====  
 NUC1 1H  
 P1 9.40 Usec  
 PL1 0.00 dB  
 SFO1 400.1324710 MHz  
 F2 - Processing parameters  
 SI 32768  
 SF 400.1300855 MHz  
 EQ  
 SSB 0  
 LB 0.30 Hz  
 GB 0  
 PC 1.00  
 10 MHz plot parameters  
 CX 35.00 cm  
 CY 20.00 cm  
 ZP 10.00 mm  
 F1 4001.30 Hz  
 F2 -0.500 ppm  
 F2 -250.97 Hz  
 PRMCK 0.00000 ppm/cm  
 TCM 120.03900 Hz/cm

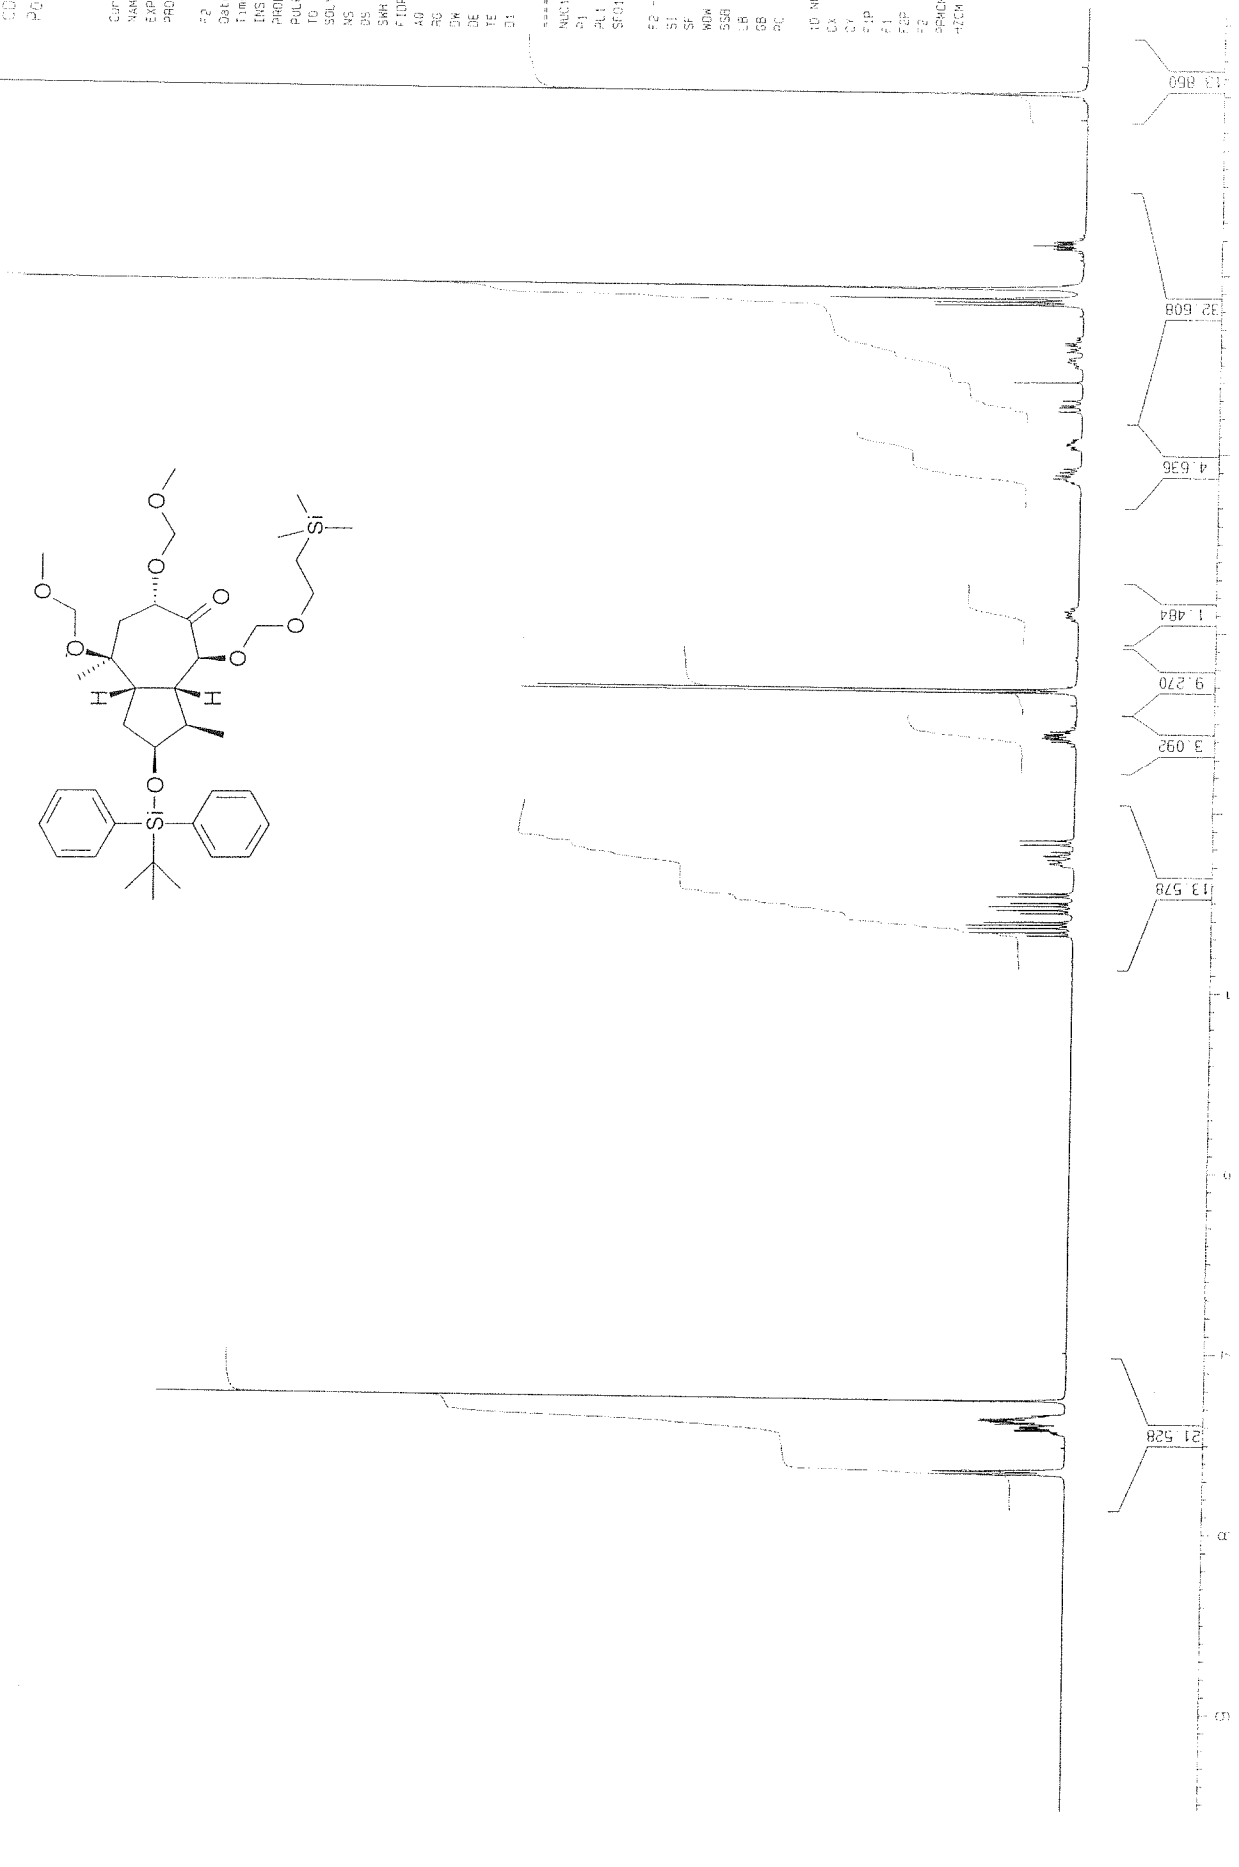



V89595  
 GSKMT2/076/A3  
 Malcolm Iait  
 13C  
 C0C13  
 Position: 35

Current Data Parameters  
 NAME V89595  
 EXPNO 12  
 PREPNO 1

F2 - Acquisition Parameters  
 Date\_ 20060611  
 Time 3:12  
 INSTRUM dsq400  
 PROBMG 5 mm QNP 1H  
 PULPROG zgpg30  
 ID B5536  
 SOLVENT C0C13  
 NS 1526  
 DS 4  
 SWH 26178.010 Hz  
 FIDRES 0.338445 Hz  
 AQ 1.2517875 sec  
 RG 5160.5  
 DM 19.100 usec  
 DE 6.00 usec  
 JE 300.0 K  
 SI 1.00000000 sec  
 SF 1.03000000 sec

\*\*\*\*\* CHANNEL f1 \*\*\*\*\*  
 NUC1 13C  
 P1 9.30 usec  
 PL1 2.00 dB  
 SF01 100.6248035 MHz

\*\*\*\*\* CHANNEL f2 \*\*\*\*\*  
 CPDPRG2 waltz16  
 NUC2 1H  
 P2 110.00 usec  
 PL2 0.00 dB  
 SF12 400.1463037 MHz

F3 - Processing parameters  
 SI 1.03000000 sec  
 SF 100.6248035 MHz  
 EQ 2K  
 AS 3.00 Hz  
 SR 1.40

1D NMR F1 F2 Parameters  
 CA 35.00 cm  
 CY 14.00 cm  
 F1P 200.160 ppm  
 F2P 201.34 Hz  
 F3P 5.000 ppm  
 GPC 1.000 Hz  
 ANK 6.40000000 sec  
 TICH 148.78633 Hz

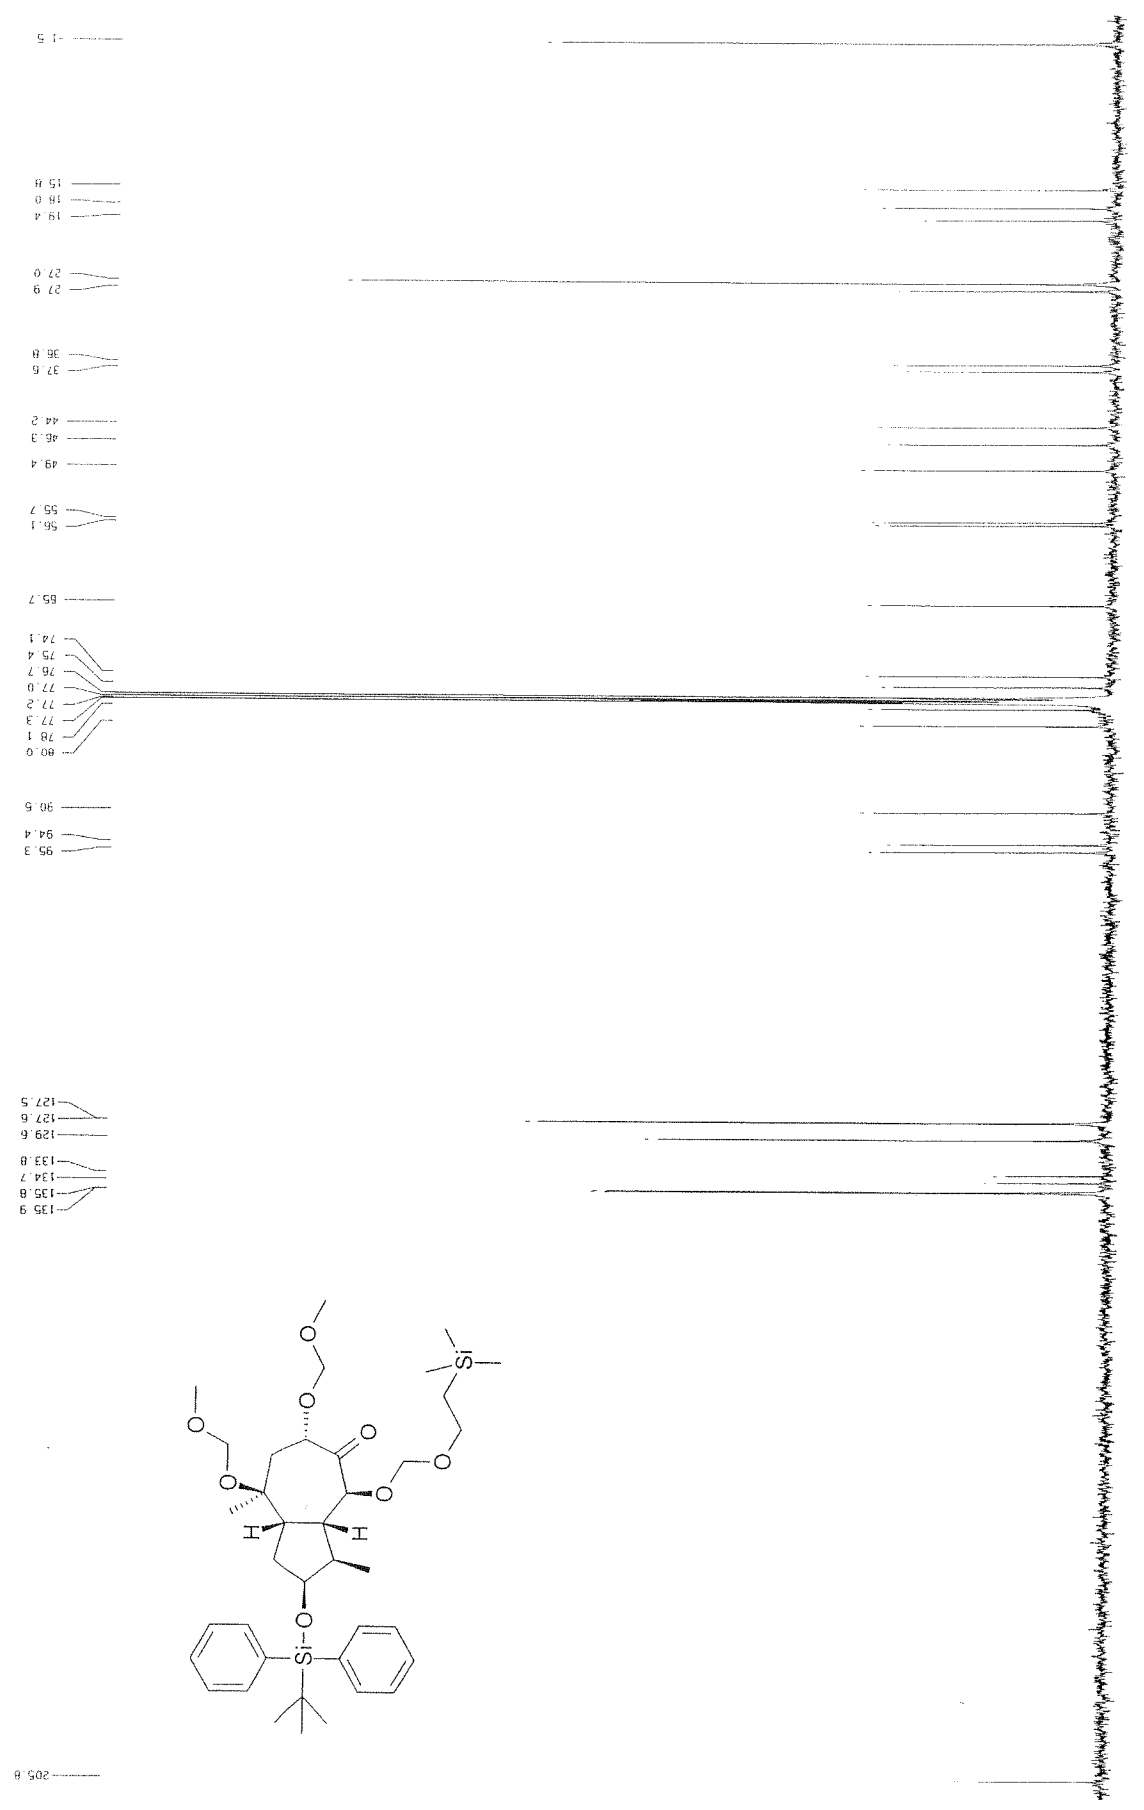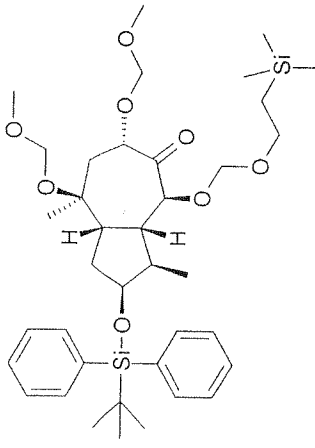

205.8

V59617  
 CSRAP07078742  
 Methylol Test  
 1H  
 C0013  
 Position: 57

Current Data Parameters  
 NAME V59617  
 EXPNO 10  
 PROCNO 1

F2 - Acquisition Parameters  
 Date \_ 20060911  
 Time 18.11  
 INSTRUM gp400  
 PROBO 5 mm QNP 1H  
 PULPROG zg30  
 TD 32768  
 SOLVENT C0013  
 NS 16  
 DS 2  
 SWH 8233.655 Hz  
 FIDRES 0.250967 Hz  
 AQ 1.9923444 sec  
 RG 181  
 F5 181  
 CN 50.500 uSsec  
 DE 6.00 uSsec  
 TE 300.0 K  
 O1 1.00000000 sec

\*\*\*\*\* CHANNEL f1 \*\*\*\*\*  
 NU01 1H  
 P1 9.40 uSsec  
 PL1 0.00 dB  
 SF01 400.1324710 MHz  
 F2 - Processing parameters  
 S1 32768  
 SF 400.1300992 MHz  
 WDW EM  
 SSF 0  
 LB 0.30 Hz  
 GB 0  
 PC 1.00  
 10 NMR P101 parameters  
 CK 35.00 cm  
 CY 25.00 cm  
 F10 10.000 ppm  
 F1 4001.30 Hz  
 F20 -6.500 ppm  
 F2 -200.07 Hz  
 PRMCK 6.30000 ppm/cm  
 PRCKM 120.03500 Hz/cm

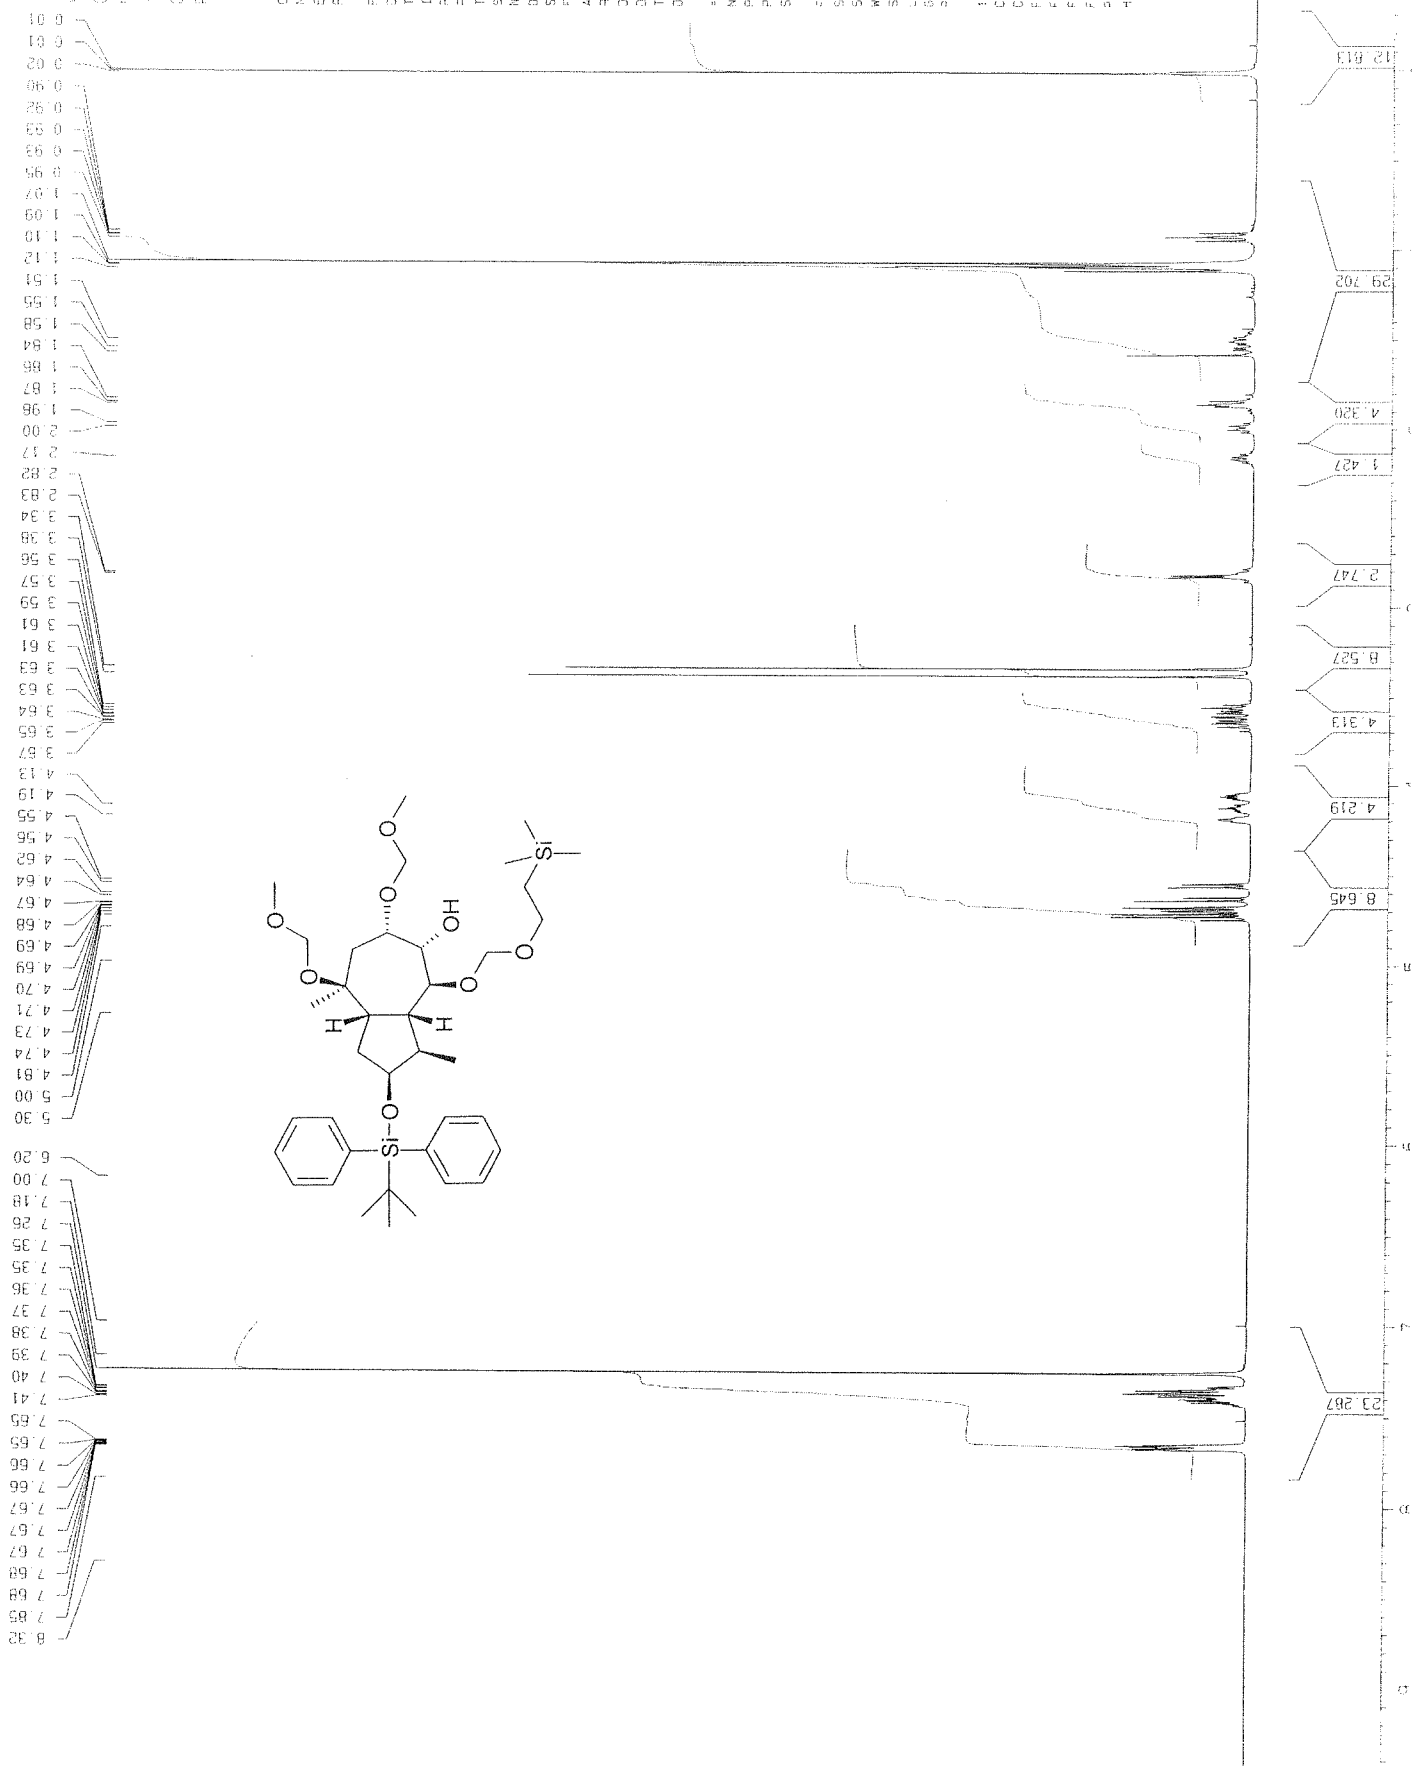

V89617  
 GSKMT2/078/A2  
 Malcolm Tait  
 13C  
 CDC13  
 Position: 57

Current Data Parameters  
 NAME V89617  
 EXPRO 12  
 PRODU 1

F2 - Acquisition Parameters  
 Date\_ 20060911  
 Time 19:30  
 INSTRUM DD-400  
 PROBHD 5 mm GNP 1H  
 PULPROG zgpg30  
 TD 65536  
 SOLVENT CDCl3  
 NS 1536  
 DS 4  
 SWH 26178.010 Hz  
 FIDRES 0.398445 Hz  
 AQ 1.2517875 sec  
 RG 1125.4  
 SW 19.100 usec  
 DE 6.00 usec  
 TE 300.0 K  
 D1 1.00000000 sec  
 D11 0.03000000 sec

\*\*\*\*\* CHANNEL f1 \*\*\*\*\*  
 NUC1 13C  
 P1 0.10 sec  
 PL 0.00 dB  
 SFO1 100.625000 MHz

\*\*\*\*\* CHANNEL f2 \*\*\*\*\*  
 CDORRG2 w01:116  
 NUC2 13C  
 P2 0.10 sec  
 PL2 0.00 dB  
 SFO2 400.130000 MHz

F2 - Processing parameters  
 SI 65636  
 SF 100.627700 MHz  
 WDM EN  
 SSB 0  
 GB 0  
 PC 1.40

F0 - NMR p100 parameters  
 CX 35.00 cm  
 CY 14.00 cm  
 F1 220.000 mm  
 F2 22134.61 Hz  
 ZP -5.000 mm  
 F0 500.136 MHz  
 DORGM 5.42853 cm/sec  
 HZCM 645.75623 Hz/cm

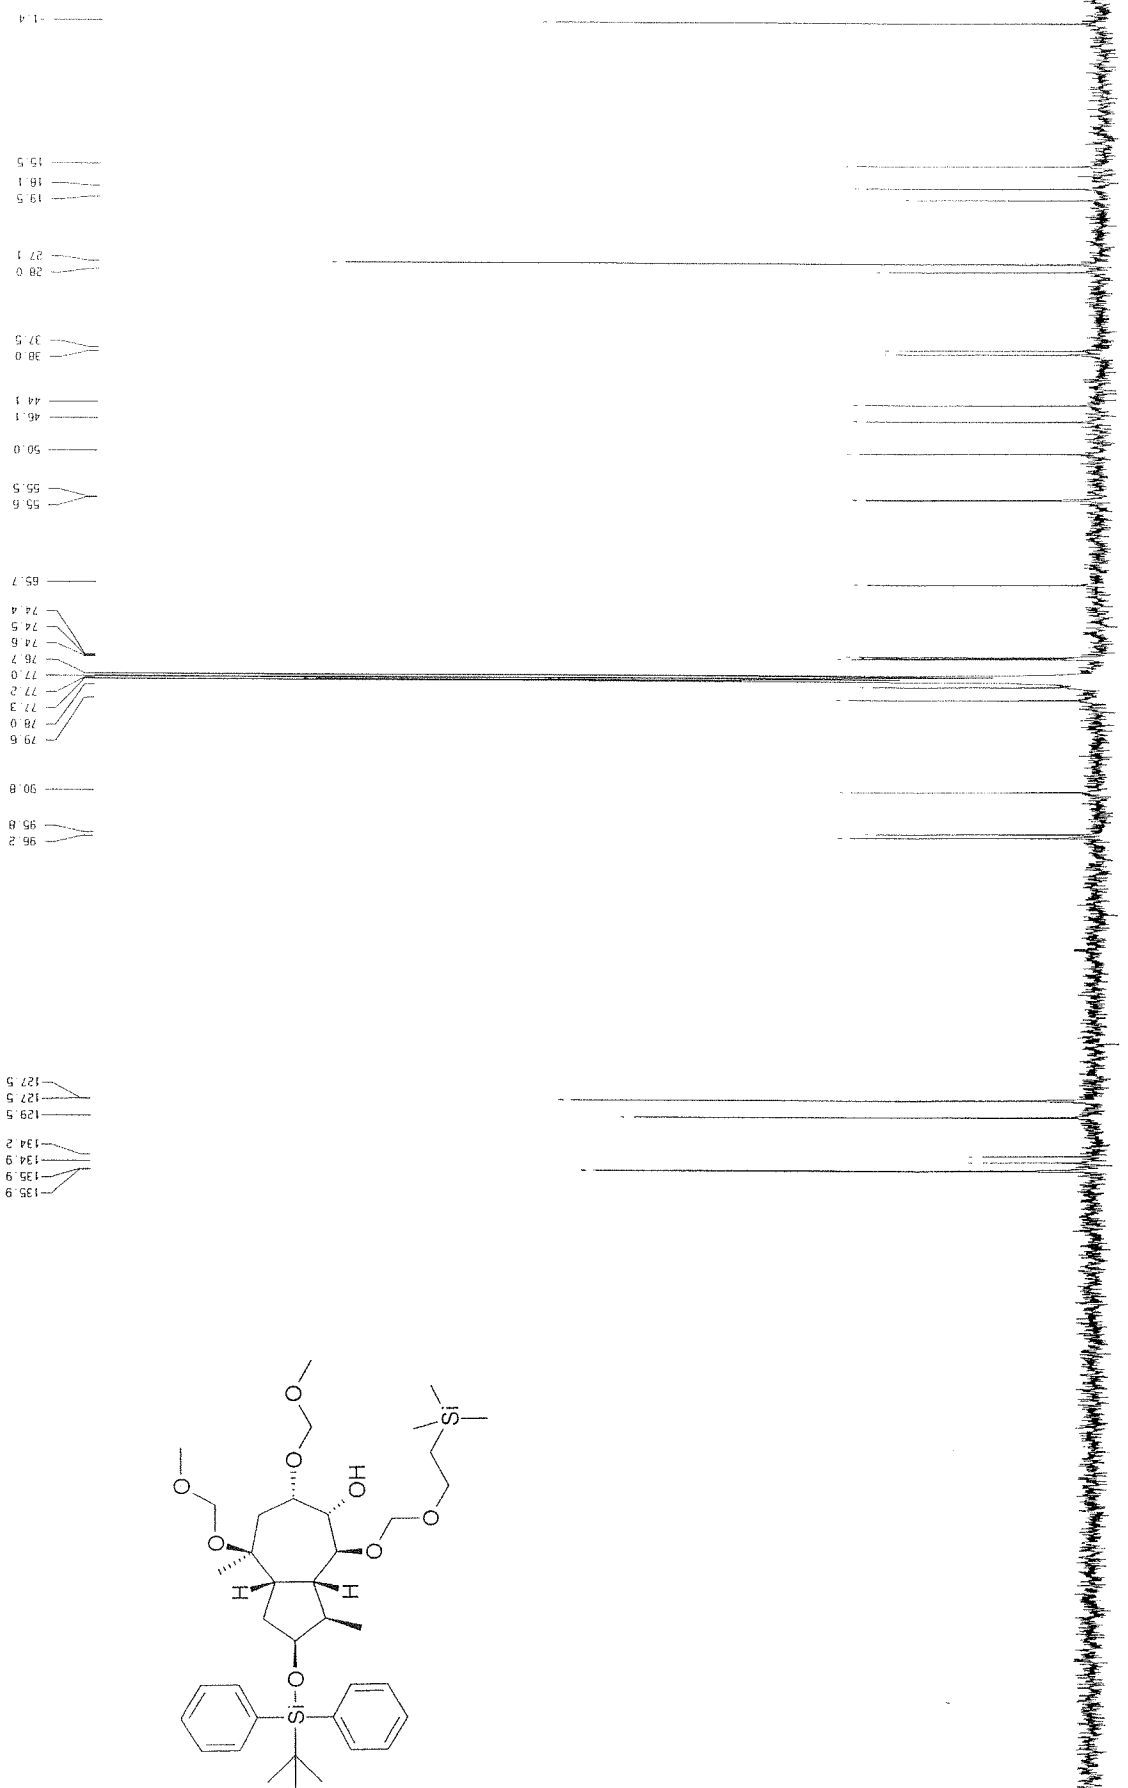

ADVERTING 11-5

n0e experiment  
J time 1 2s  
: itation 50ms

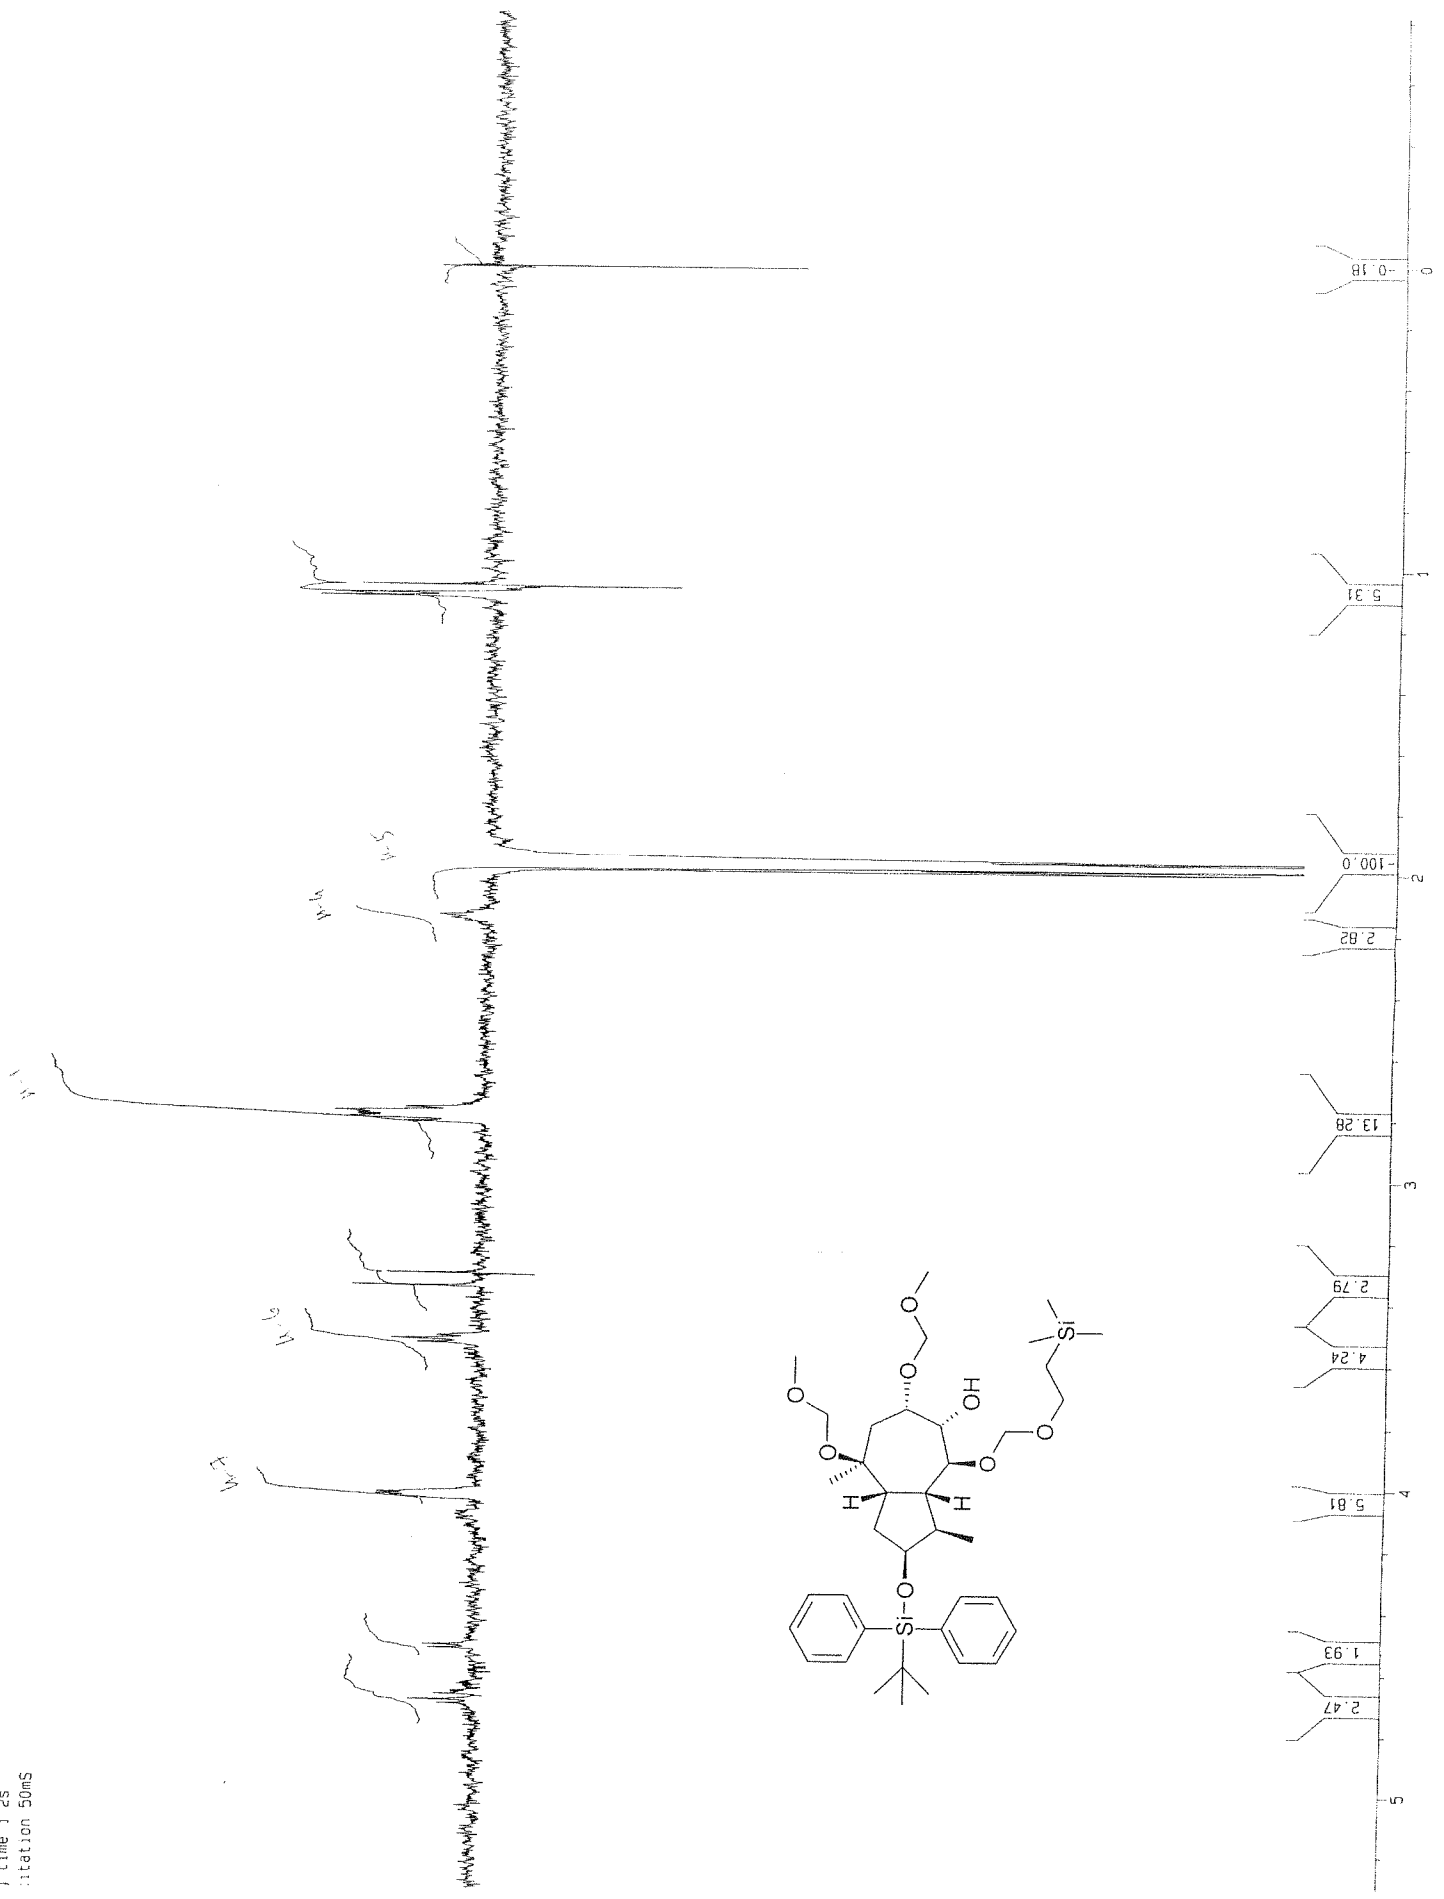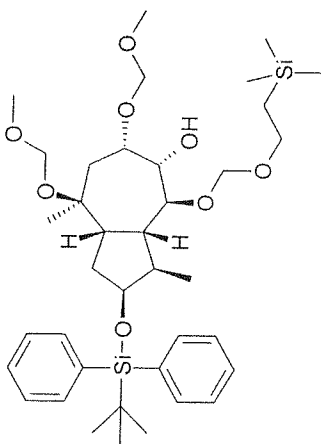

V89664  
 GSKMT2/079/A2  
 Methylip Tail  
 1H  
 C0C13  
 POSITION: 44

Current Data Parameters  
 NAME V89664  
 EXPNO 10  
 PROCNO 1

F2 - Acquisition Parameters  
 Date\_ 20060615  
 Time 0.17  
 INSTRUM dp400  
 PROBHD 5 mm QNP 1H  
 PULPROG zg30  
 TD 32768  
 SOLVENT C0C13  
 NS 16  
 DS 2  
 SWH 8223.665 MHz  
 FIDRES 0.250367 MHz  
 AQ 1.8923444 sec  
 RG 181  
 DW 50.500 usec  
 DE 6.00 usec  
 TE 300.0 K  
 D1 1.00000000 sec

\*\*\*\*\* CHANNEL F1 \*\*\*\*\*  
 NUC1 1H  
 P1 9.40 usec  
 PL1 0.00 dB  
 SFO1 400.1324710 MHz

F2 - Processing parameters  
 SI 32768  
 SF 400.1300092 MHz  
 WDW EM  
 SSB 0  
 LB 0.30 Hz  
 GB 0  
 PC 1.00

1D NMR plot parameters  
 CX 35.00 cm  
 CY 25.00 cm  
 F1P 10.000 GHz  
 F1 400.130 MHz  
 F2P -0.500 GHz  
 F2 -200.075 MHz  
 WDM 0.30000 GHz/cm  
 WDC 120.03900 Hz/cm

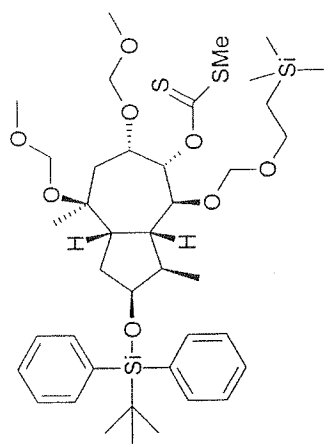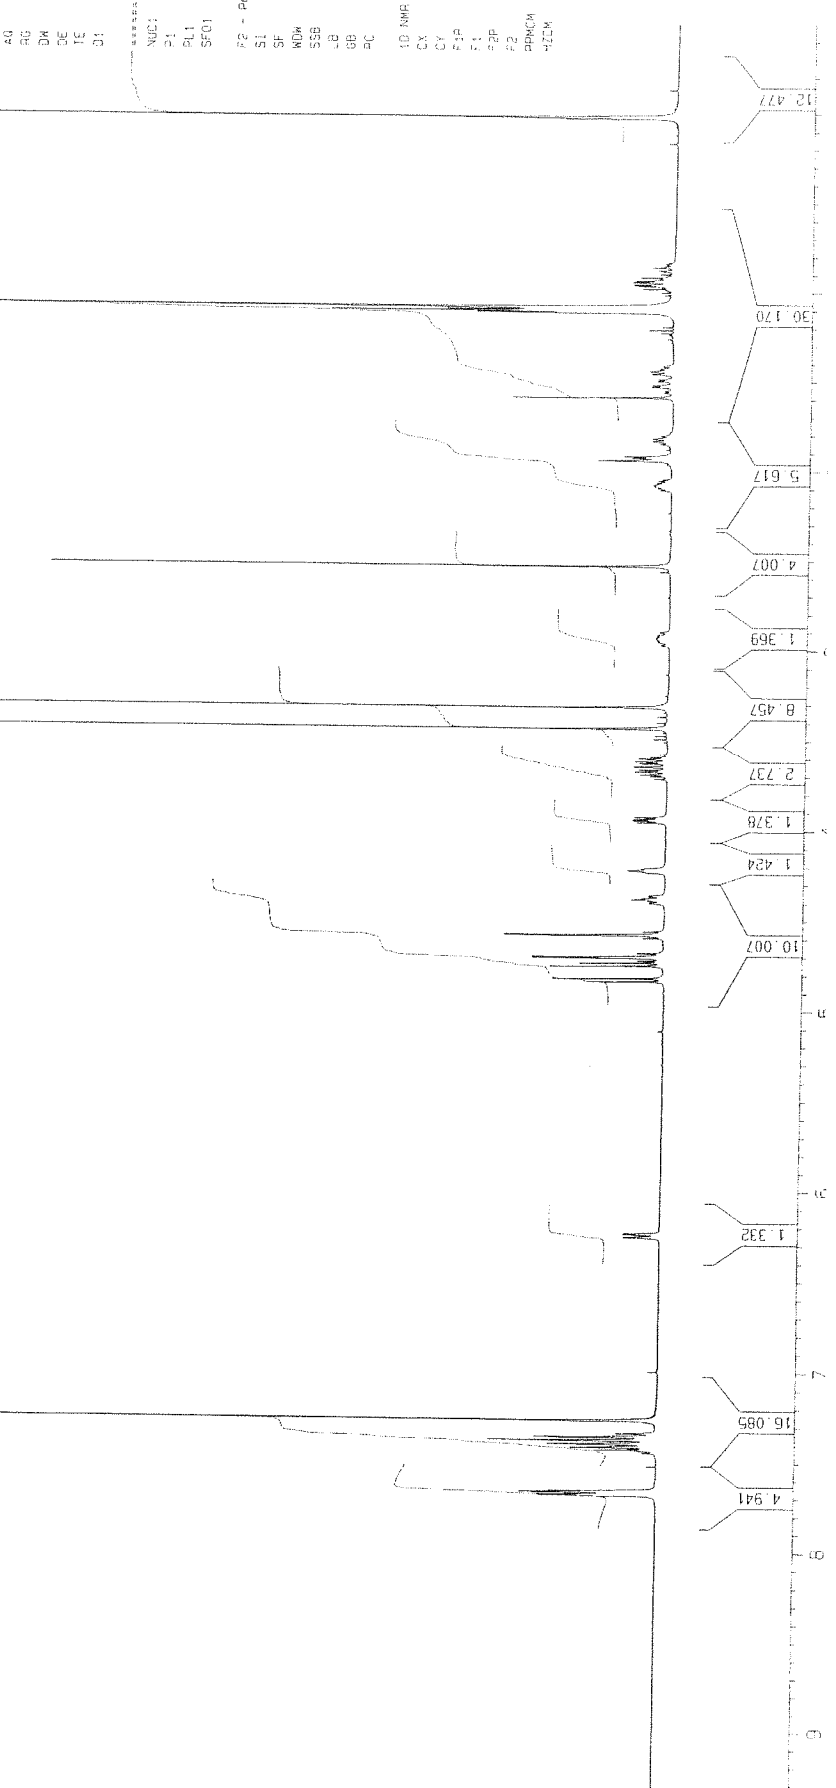



F2 - Acquisition Parameters  
 Date: 20060818 11:56  
 NAME: M12-08044  
 EXPNO: 1  
 PROCNO: 1

Current Data Parameters  
 0.006  
 0.030  
 0.873  
 0.883  
 0.892  
 0.902  
 0.910  
 0.920  
 1.074  
 1.079  
 1.122  
 1.133  
 1.349  
 1.356  
 1.543  
 1.560  
 1.568  
 1.584  
 1.671  
 1.808  
 1.817  
 1.877  
 1.887  
 1.930  
 1.942  
 2.171  
 3.322  
 3.404  
 3.501  
 3.515  
 3.571  
 3.581  
 3.622  
 3.629  
 3.639  
 4.218  
 4.224  
 4.557  
 4.562  
 4.569  
 4.573  
 4.615  
 4.626  
 4.641  
 4.652  
 4.735  
 7.260  
 7.341  
 7.354  
 7.367  
 7.380  
 7.396  
 7.408  
 7.420  
 7.662  
 7.674

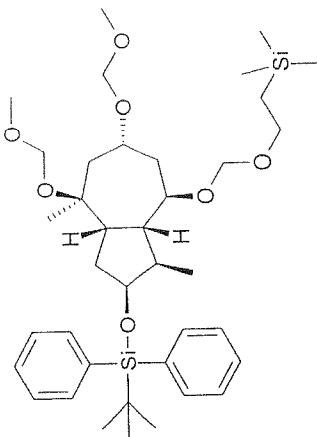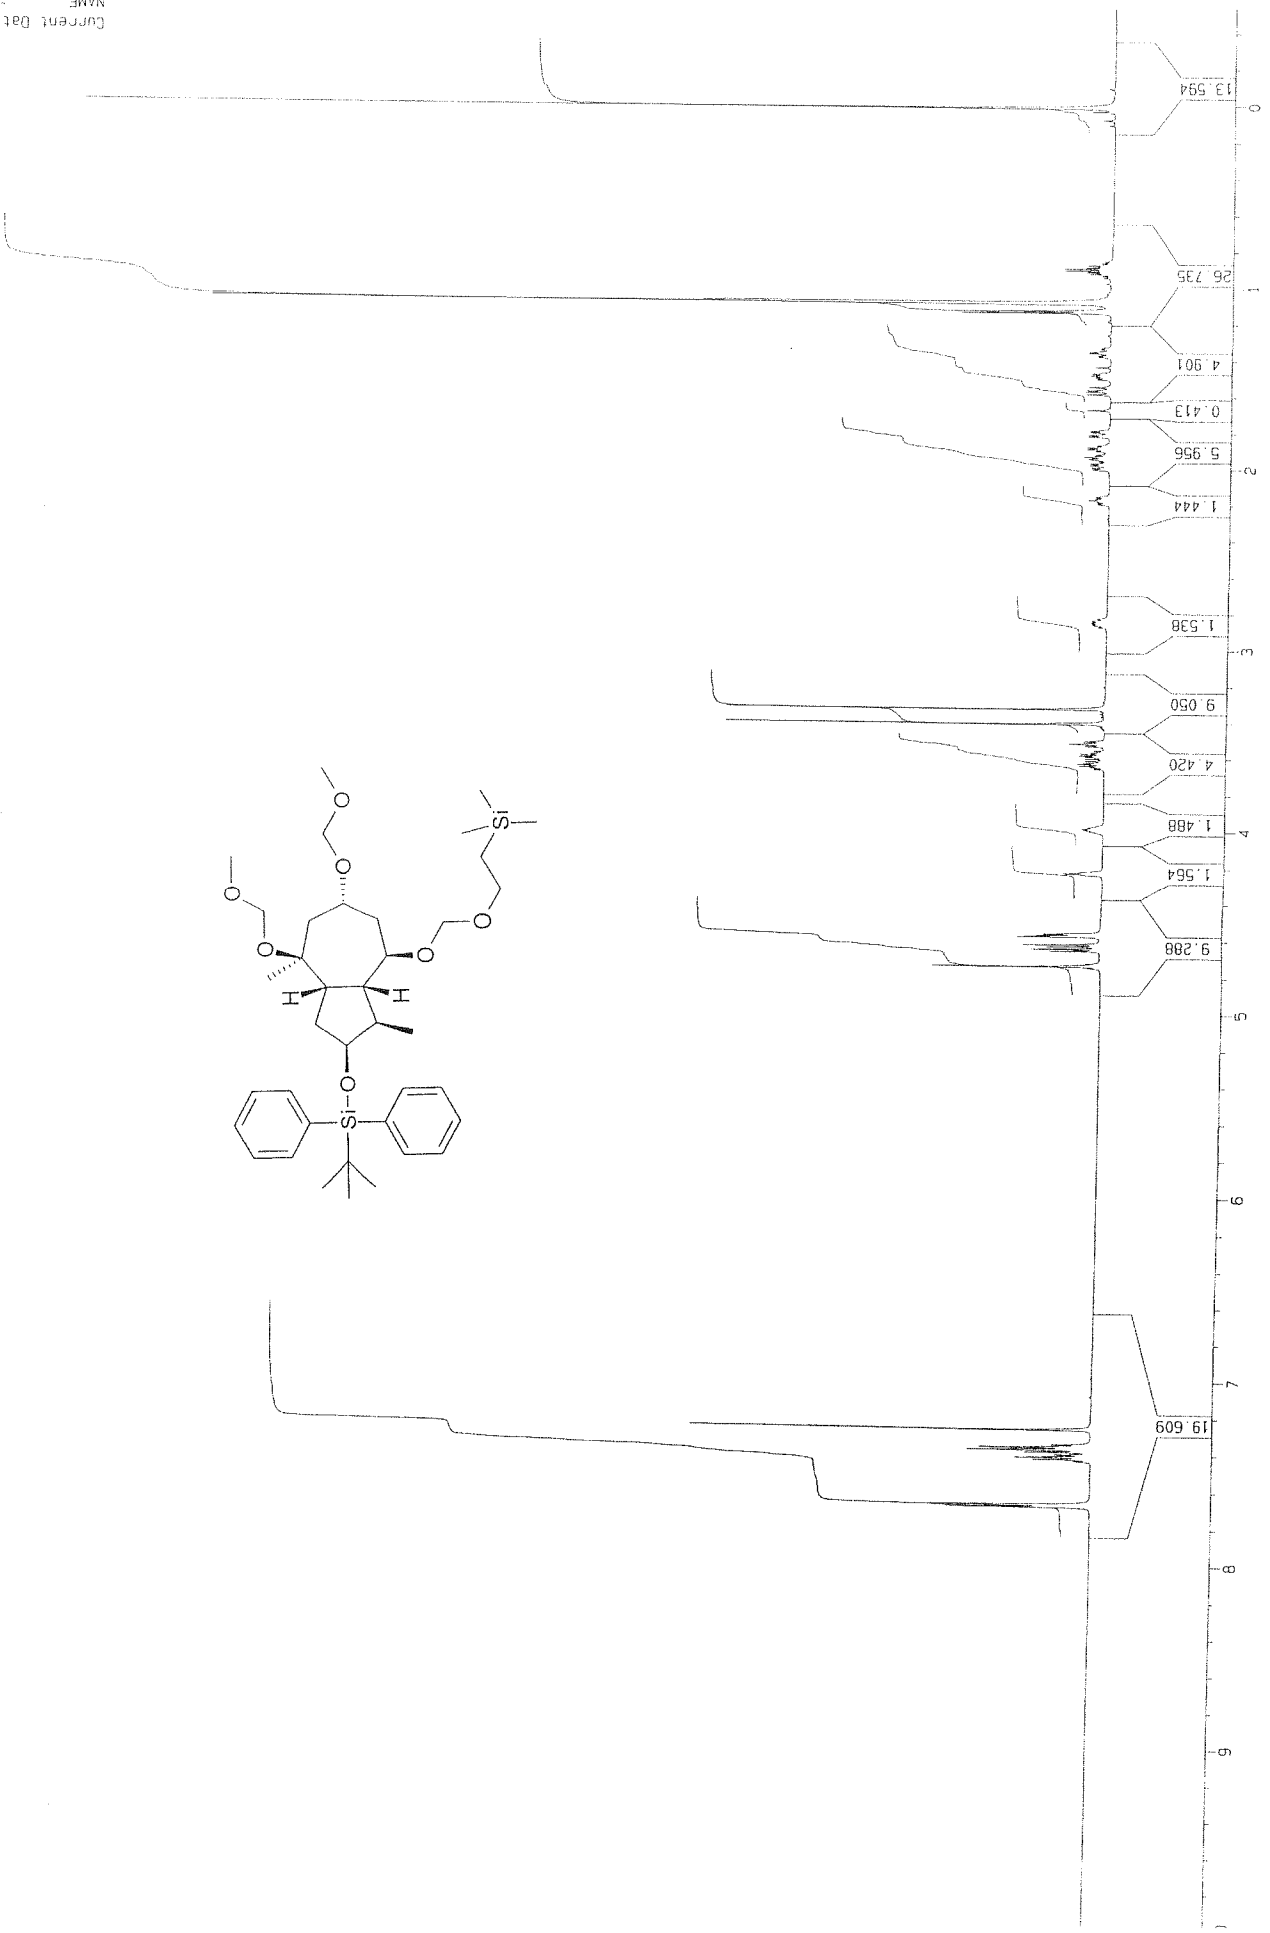





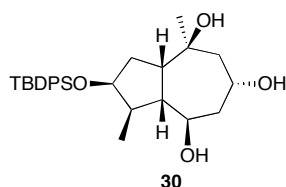

**Triol 30:** A solution of **29** (199.4 mg, 0.29 mmol) in MeOH (3 mL) and HCl (Specific Gravity 1.16 - 32%, 6 drops) was heated to 40 °C for 2 hours. After cooling to room temperature the reaction mixture was quenched with aqueous sodium bicarbonate (10 mL) and extracted with EtOAc (4 × 10 mL). The combined organics were dried (MgSO<sub>4</sub>) and concentrated *in vacuo* to a clear oil. This was purified by flash chromatography (SiO<sub>2</sub>, ethyl acetate) to yield the title compound as a cream foam, 124.6 mg, 92%; δ<sub>H</sub> (600 MHz; CDCl<sub>3</sub>) 7.68 – 7.66 (4H, m, *o*-Ph), 7.43 – 7.34 (6H, m, *m*-Ph, *p*-Ph), 4.95 (2H, br, OH), 4.34 – 4.30 (1H, m, H-8), 4.16 – 4.13 (1H, m (br), H-3), 3.96 – 3.89 (1H, m (br), H-6), 2.84 (1H, br, OH), 2.77 (1H, ddd, *J* 7.0, 11.8, 11.8, H-1), 2.35 (1H, ddd, *J* 2.4, 10.9, 10.9, H-5), 2.21 – 2.12 (1H, m (br), H-7), 1.87 (1H, d (br), *J* 13.6, H-9), 1.68 (1H, dd, *J* 11.6, 13.5, H-9'), 1.62 (1H, dd, *J* 12.6, 12.6, H-7'), 1.58 – 1.50 (2H, m, H-2, H-4), 1.19 (1H, ddd, *J* 2.4, 11.1, 11.1, H-2'), 1.07 (9H, s, C(CH<sub>3</sub>)<sub>3</sub>), 1.04 (3H, s, H-11), 1.02 (3H, d, *J* 6.6, H-12); δ<sub>C</sub> (150 MHz; CDCl<sub>3</sub>) 136.0 (*o*-Ph), 135.9 (*o*-Ph), 134.8 (*ipso*-Ph), 133.9 (*ipso*-Ph), 129.6 (*p*-Ph), 129.6 (*p*-Ph), 127.6 (*m*-Ph), 127.5 (*m*-Ph), 76.1 (C-3), 73.4 (C-10), 69.0 (C-6), 64.4 (C-8), 50.4 (C-5), 49.7 (C-1), 45.9 (C-9), 44.7 (C-4), 39.5 (C-7), 39.1 (C-2), 32.1 (C-11), 27.1 (C(CH<sub>3</sub>)<sub>3</sub>), 19.5 (C(CH<sub>3</sub>)<sub>3</sub>), 14.3 (C-12); ν<sub>max</sub> (film; cm<sup>-1</sup>) 3271m (br), 3071w, 2960m, 2930m, 2857m, 1473m, 1459m, 1428m, 1375m, 1290w, 1259w, 1233w, 1190m, 1111s, 1074m, 1040m, 1019m, 934w, 905m, 858w, 822m, 741m, 702s, 667m; [α]<sub>D</sub> +35.2 (*c.* 1.23, CHCl<sub>3</sub>); mp 159 – 160 °C; found (ESI+) [MNa]<sup>+</sup> 491.2592, C<sub>28</sub>H<sub>40</sub>O<sub>4</sub>NaSi requires *M*, 491.2594.



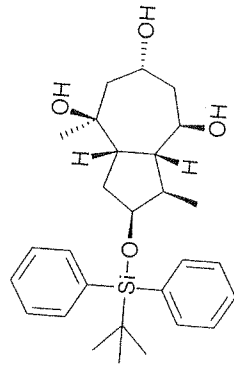

135.98  
135.86  
134.83  
133.87  
129.60  
129.58  
127.56  
127.48

77.21  
77.00  
76.79  
76.13  
73.44  
68.97  
64.39

50.42  
49.71  
45.85  
44.71  
39.52  
39.05  
32.12  
27.10  
19.49  
14.33

Current Data Parameters  
NAME M12-085A4  
EXPNO 2  
PROCNO 1

F2 - Acquisition Parameters

Date\_ 20060822  
Time 10.12  
INSTRUM spect  
PROBHD 5 mm Multinu  
PULPROG zgpg  
TD 131072  
SOLVENT CDCl3  
NS 256  
DS 0  
SWH 37593.984 Hz  
FIDRES 0.286819 Hz  
AQ 1.7433076 sec  
RG 4096  
DW 13.300 usec  
DE 6.00 usec  
TE 300.0 K  
d1 2.00000000 sec  
d11 0.03000000 sec  
d12 0.00002000 sec

==== CHANNEL f1 =====  
NUC1 13C  
P1 5.00 usec  
PL1 0.00 dB  
SF01 150.9178993 MHz

==== CHANNEL f2 =====  
waitz16  
CPDPRG2 1H  
NUC2 13C  
PCPD2 100.00 usec  
PL2 20.00 dB  
PL12 18.00 dB  
PL13 20.00 dB  
SF02 600.1324005 MHz

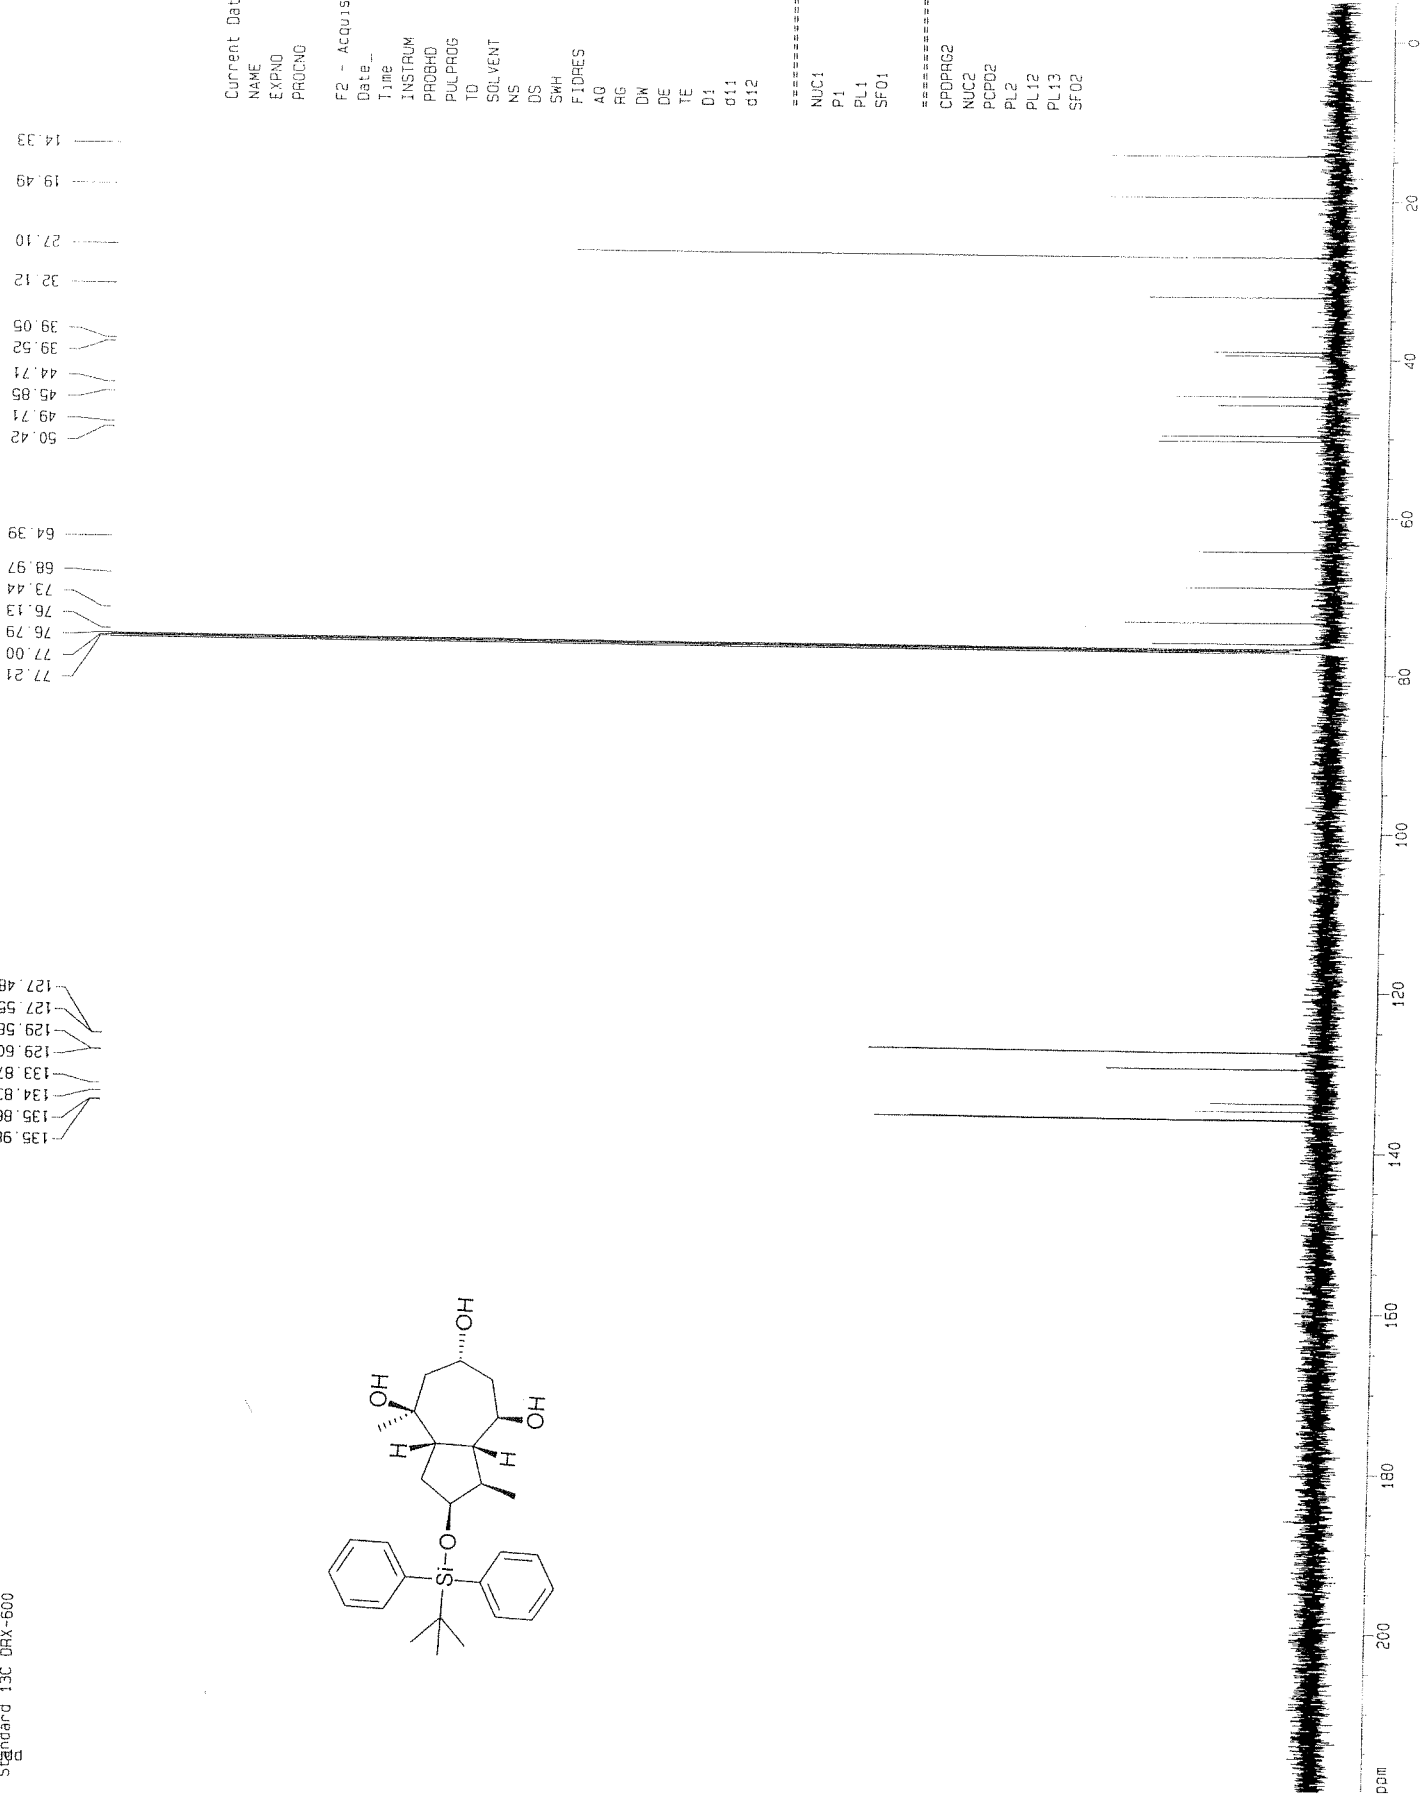

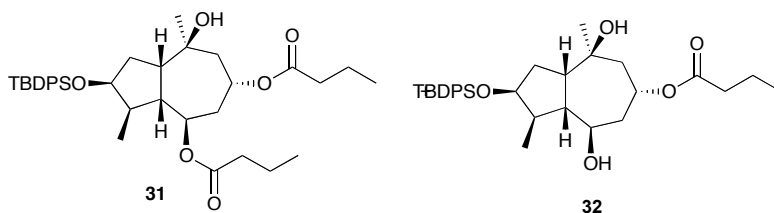

**Butyrates 31 and 32:** To a solution of triol **30** (124.6 mg, 0.266 mmol) and DMAP (3 granules) in  $\text{CH}_2\text{Cl}_2$  (5 mL) was added butyric anhydride (48  $\mu\text{L}$ , 0.292 mmol) as a solution in  $\text{CH}_2\text{Cl}_2$  (5 mL) in one portion. The solution was stirred for 1 hour at which point another aliquot of butyric anhydride (9  $\mu\text{L}$ , 0.053 mmol) was added and the mixture stirred for a further 2 hours. The solution was quenched with aqueous ammonium chloride (20 mL) and extracted with EtOAc (4  $\times$  20 mL). The combined organics were washed with aqueous sodium bicarbonate (2  $\times$  10 mL), brine (10 mL) then dried ( $\text{MgSO}_4$ ) and concentrated *in vacuo* to a clear oil. This was purified by flash chromatography ( $\text{SiO}_2$ ,  $\text{Et}_2\text{O}$ /petrol ether, 1:10 to 1:1) to yield mono-acylated **32** (81 mg, 57%) and bis-acylated **31** (48 mg, 30%) as clear oils, 87% overall yield.

**32:**  $\delta_{\text{H}}$  (600 MHz;  $\text{CDCl}_3$ ) 7.67 (4H, d (br),  $J$  6.9, *o*-Ph), 7.43 – 7.35 (6H, m, *m*-Ph, *p*-Ph), 5.43 – 5.39 (1H, m (br), H-8), 4.28 (1H, br, OH), 4.17 – 4.14 (1H, m (br), H-3), 3.99 (1H, br, OH), 3.95 – 3.94 (1H, m (br), H-6), 2.81 (1H, ddd,  $J$  7.4, 11.8, 11.8, H-1), 2.40 (1H, ddd,  $J$  1.6, 10.8, 10.8, H-5), 2.21 (2H, t,  $J$  7.4,  $\text{CH}_2\text{CH}_2\text{CH}_3$ ), 2.20 – 2.16 (1H, m, H-7), 1.91 – 1.87 (1H, m, H-9), 1.71 (1H, dd,  $J$  12.5, 12.5, H-9'), 1.67 (1H, dd,  $J$  12.6, 12.6, H-7'), 1.65 – 1.57 (2H, m,  $\text{CH}_2\text{CH}_2\text{CH}_3$ ), 1.56 – 1.54 (2H, m, H-2, H-4), 1.19 (1H, ddd,  $J$  2.6, 13.8, 13.8, H-2'), 1.07 (9H, s,  $\text{C}(\text{CH}_3)_3$ ), 1.07 (3H, s, H-11), 1.04 (3H, d,  $J$  6.6, H-12), 0.91 (3H, t,  $J$  7.4,  $\text{CH}_2\text{CH}_2\text{CH}_3$ );  $\delta_{\text{C}}$  (150 MHz;  $\text{CDCl}_3$ ) 172.9 ( $\text{C}(\text{O})\text{CH}_2$ ), 136.0 (*o*-Ph), 135.9 (*o*-Ph), 134.8 (*ipso*-Ph), 133.9 (*ipso*-Ph), 129.6 (*p*-Ph), 129.6 (*p*-Ph), 127.5 (*m*-Ph), 127.5 (*m*-Ph), 76.0 (C-3), 73.3 (C-10), 68.9 (C-6), 68.2 (C-8), 50.4 (C-5), 49.6 (C-1), 44.9 (C-4), 42.2 (C-9), 39.1 (C-2), 36.6 ( $\text{CH}_2\text{CH}_2\text{CH}_3$ ), 36.2 (C-7), 32.2 (C-11), 27.1 ( $\text{C}(\text{CH}_3)_3$ ), 19.5 ( $\text{C}(\text{CH}_3)_3$ ), 18.5 ( $\text{CH}_2\text{CH}_2\text{CH}_3$ ), 14.3 (C-12), 13.6 ( $\text{CH}_2\text{CH}_2\text{CH}_3$ );  $\nu_{\text{max}}$  (film;  $\text{cm}^{-1}$ ) 3274m (br), 3071w, 2962m, 2931m, 2857m, 1733m, 1460m, 1428m, 1362m, 1306m, 1287m, 1260m, 1230m, 1184s, 1140m, 1128m, 1105s, 1074m, 1054m, 1033m, 1024m, 971m, 951m, 934m, 906, 864w, 822m, 741m, 704s, 672m;  $[\alpha]_{\text{D}} +37.7$  (*c.* 0.62,  $\text{CHCl}_3$ ); found (ESI+)  $[\text{MNa}]^+$  561.3027;  $\text{C}_{32}\text{H}_{46}\text{O}_5\text{NaSi}$  requires  $M$ , 561.3012.

**31:**  $\delta_{\text{H}}$  (400 MHz;  $\text{CDCl}_3$ ) 7.68 – 7.65 (4H, m, *o*-Ph), 7.46 – 7.34 (6H, m, *m*-Ph, *p*-Ph), 5.29 – 5.21 (1H, m, H-8), 5.15 (1H, dd (br),  $J$  3.1, 7.2, H-6), 4.17 – 4.15 (1H, m (br), H-3), 3.66 (1H, br, OH), 2.82 (1H, ddd,  $J$  6.8, 10.8, 12.6, H-1), 2.46 – 2.32 (2H, m, O-8-C(O) $\text{CH}_2\text{CH}_2\text{CH}_3$ ), 2.27 – 2.16 (2H, m, H-5, H-7), 2.19 (2H, t,  $J$  7.4, O-6-C(O) $\text{CH}_2\text{CH}_2\text{CH}_3$ ), 1.90 – 1.87 (1H, m (br), H-9), 1.78 – 1.67 (4H, m, H-7', H-9', O-8-C(O) $\text{CH}_2\text{CH}_2\text{CH}_3$ ), 1.64 – 1.55 (4H, m, H-2, H-4, O-6-C(O) $\text{CH}_2\text{CH}_2\text{CH}_3$ ), 1.29 – 1.23 (1H, m, H-2'), 1.10 (3H, d,  $J$  6.7, H-14), 1.07 (9H, s,  $\text{C}(\text{CH}_3)_3$ ), 1.05 (3H, s, H-13), 0.99 (3H, t,  $J$  7.4, O-8-C(O) $\text{CH}_2\text{CH}_2\text{CH}_3$ ), 0.90 (3H, t,  $J$  7.4, O-6-C(O) $\text{CH}_2\text{CH}_2\text{CH}_3$ );  $\delta_{\text{C}}$  (100 MHz;  $\text{CDCl}_3$ ) 172.4 (O-6-C(O)), 171.5 (O-8-C(O)), 136.0 (*o*-Ph), 135.9 (*o*-Ph), 134.7 (*ipso*-Ph), 133.7 (*ipso*-Ph), 129.6 (*p*-Ph), 127.6 (*m*-Ph), 127.5 (*m*-Ph), 75.5 (C-3), 72.5 (C-10), 71.8 (C-6), 67.3 (C-8), 49.9 (C-1), 48.3 (C-5), 45.0 (C-4), 42.7 (C-9), 39.4 (C-2), 36.5, 36.4 (O-6-C(O) $\text{CH}_2\text{CH}_2\text{CH}_3$  and O-8-C(O) $\text{CH}_2\text{CH}_2\text{CH}_3$ ), 33.8 (C-7), 31.4 (C-13), 27.1 ( $\text{C}(\text{CH}_3)_3$ ), 19.5 ( $\text{C}(\text{CH}_3)_3$ ), 18.4, 18.3 (O-6-C(O) $\text{CH}_2\text{CH}_2\text{CH}_3$  and O-8-C(O) $\text{CH}_2\text{CH}_2\text{CH}_3$ ), 14.3 (C-14), 13.6, 13.6 (O-6-C(O) $\text{CH}_2\text{CH}_2\text{CH}_3$  and O-8-C(O) $\text{CH}_2\text{CH}_2\text{CH}_3$ );  $\nu_{\text{max}}$  (film;  $\text{cm}^{-1}$ ) 3557w (br), 2965s, 2933s, 1733s, 1458m, 1428m, 1382m, 1362m, 1258m, 1184s, 1105s, 1077s, 1037m, 1015m, 951w, 922w, 823m,

742m, 703s;  $[\alpha]_D +35.4$  (c. 0.42,  $\text{CHCl}_3$ ); found (ESI+)  $[\text{MNa}]^+$  631.3411;  
 $\text{C}_{36}\text{H}_{52}\text{O}_6\text{NaSi}$  requires  $M$ , 631.3431.

0.870  
0.745  
0.885  
0.904  
0.922  
0.972  
0.990  
1.009  
1.052  
1.070  
1.095  
1.112  
1.207  
1.432  
1.570  
1.588  
1.607  
1.625  
1.693  
1.712  
1.730  
1.749  
2.173  
2.192  
2.210  
2.381  
2.384  
2.400  
2.403  
2.803  
2.817  
2.830  
2.845  
3.453  
3.470  
3.488  
3.664  
4.153  
4.161  
4.169  
5.141  
5.148  
5.159  
5.167  
5.219  
5.228  
5.238  
5.247  
5.256  
5.266  
5.275  
5.285  
5.297  
6.977  
6.996  
7.260  
7.266  
7.267  
7.359  
7.362  
7.377  
7.380  
7.385  
7.399  
7.401  
7.419  
7.436  
7.550  
7.553  
7.557  
7.570  
7.573  
7.576  
7.666

VBB906  
GSKM2/066/A2  
Maltolm Tail  
1H  
CDCl3  
Position: 6

Current Data Parameters  
NAME: VBB906  
EXPNO: 10  
PROCNO: 1

F2 - Acquisition Parameters  
Date\_: 20080524  
Time: 0.55  
INSTRUM: spect  
PQ03HD: 5 mm QNP 1H  
PULPROG: zgpg30  
TC: 327.68  
SOLVENT: CDCl3  
NS: 16  
DS: 2  
SWH: 3223.885 Hz  
FIDRES: 0.250567 Hz  
AQ: 1.9923444 sec  
RG: 286  
DM: 60.800 uSec  
DE: 6.00 uSec  
TE: 300.2 K  
D1: 1.00000000 sec

\*\*\*\*\* CHANNEL f1 \*\*\*\*\*  
NUC1: 1H  
P1: 9.40 uSec  
PL1: 0.00 dB  
SFO1: 400.1324710 MHz

F2 - Processing parameters  
SI: 32768  
SF: 400.1324710 MHz  
WDW: EM  
SSB: 0  
B1: 0.30 Hz  
B2: 0  
B3: 1.00

1D NMR data parameters  
CY: 35.00 cm  
CX: 15.00 cm  
F1: 10.000 ppm  
F2: 400.130 MHz  
P2: -0.500 dB  
Z2: -200.97 Hz  
RG: 0.30000000 cm/cm  
WDW: EM

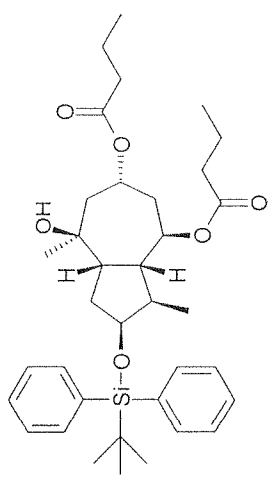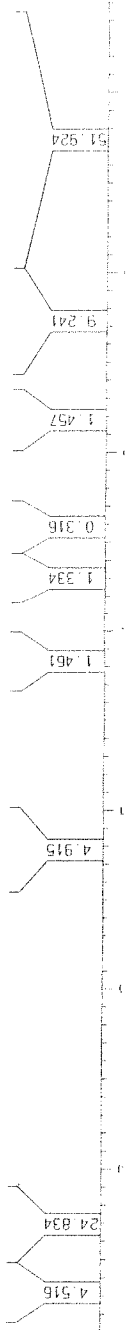

V89806  
 GSKMT2/086/A2  
 Malicidin T61c  
 13C  
 CDCl3  
 Position: 5

Experiment Parameters  
 Name: V89806  
 Date: 20060824  
 Time: 3:14  
 INSTRUM: 400-460  
 PULPROG: zgpg30  
 TD: 65536  
 SOLVENT: CDCl3  
 NS: 1536  
 DS: 4  
 SWH: 25176.010 Hz  
 FIDRES: 0.248445 Hz  
 AQ: 1.2537875 sec  
 RG: 514.7  
 DM: 15.100 usec  
 DE: 6.000 usec  
 TE: 300.0 K  
 D1: 1.00000000 sec  
 D11: 0.03000000 sec

\*\*\*\*\* CHANNEL f1 \*\*\*\*\*  
 NUC1: 13C  
 P1: 5.30 usec  
 PL1: -2.00 dB  
 SF01: 100.626005 MHz

\*\*\*\*\* CHANNEL f2 \*\*\*\*\*  
 CPDPRG2: waltz16  
 NUC2: 1H  
 PCPD2: 110.00 usec  
 PL2: 0.00 dB  
 PL12: 21.00 dB  
 SF02: 400.1326007 MHz

F2 - Processing parameters  
 SI: 65536  
 SF: 100.6127701 MHz  
 MDW: EM  
 AS: 0  
 LS: 3.00 Hz  
 GB: 0  
 SC: 1.40

1D NMR plot parameters  
 CX: 35.00 cm  
 CY: 8.00 cm  
 F1: 220.000 ppm  
 F2: 221.3481 Hz  
 ZP: -5.000 ppm  
 ZC: -503.86 Hz  
 PPM0: 5.42857 ppm/cm  
 6.46 78623 Hz/cm

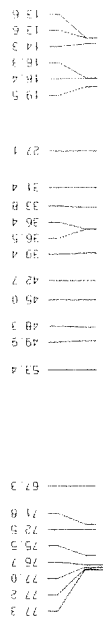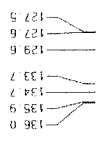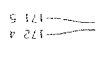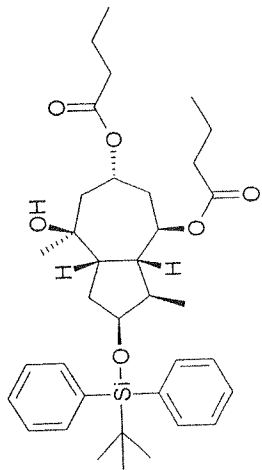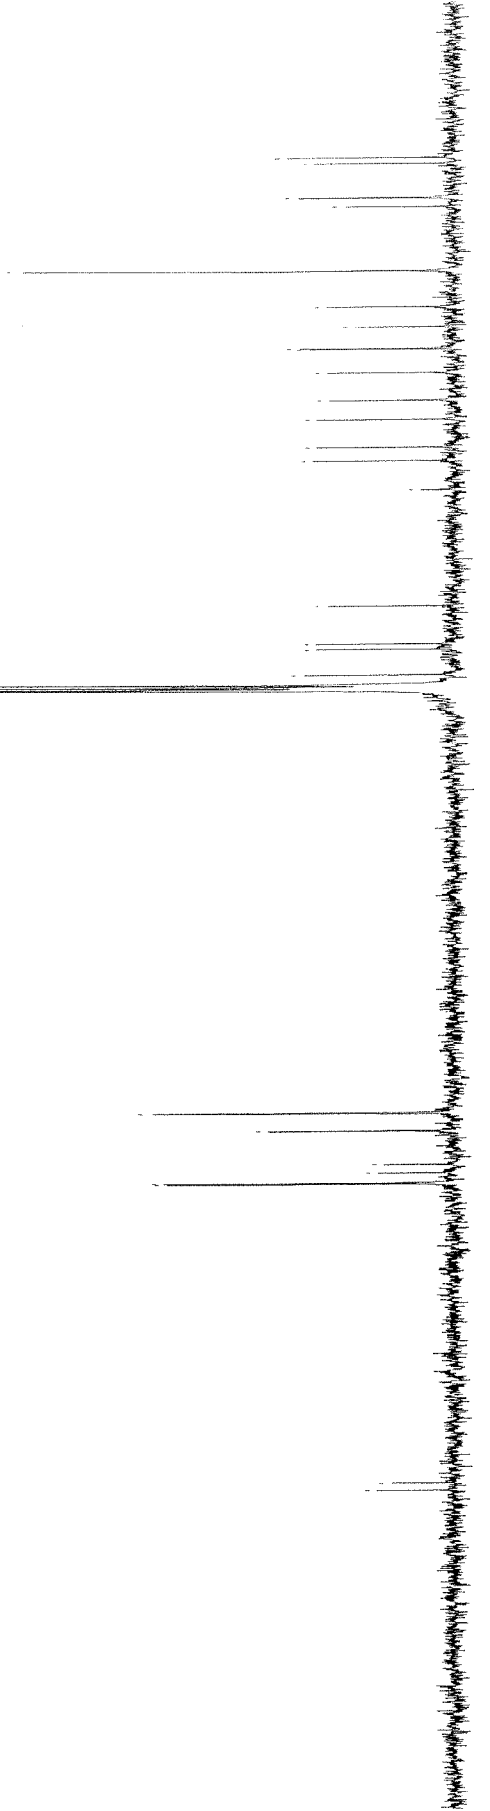

Current Data Parameters  
 NAME : M12-0867A  
 EXPNO : 1  
 PROCNO : 1  
 Date\_ : 20060829  
 Time : 11:42  
 INSTRUM : spect  
 PROBNM : 5 mm mlt1

0.902  
 0.912  
 0.926  
 1.033  
 1.043  
 1.066  
 1.074  
 1.192  
 1.431  
 1.538  
 1.547  
 1.557  
 1.569  
 1.588  
 1.601  
 1.613  
 1.625  
 1.670  
 1.690  
 1.706  
 1.727  
 1.809  
 1.910  
 2.195  
 2.207  
 2.219  
 2.334  
 2.397  
 2.796  
 2.803  
 2.814

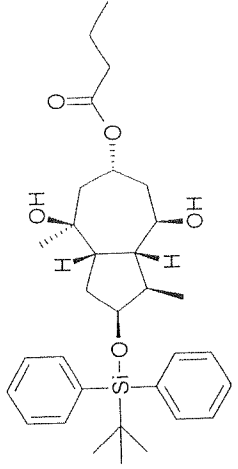

3.941  
 3.949  
 4.155  
 5.297  
 5.404  
 5.410  
 5.415

7.260  
 7.347  
 7.359  
 7.370  
 7.381  
 7.393  
 7.403  
 7.415  
 7.431  
 7.444  
 7.557  
 7.579  
 7.610 (H)  
 7.620 (H)

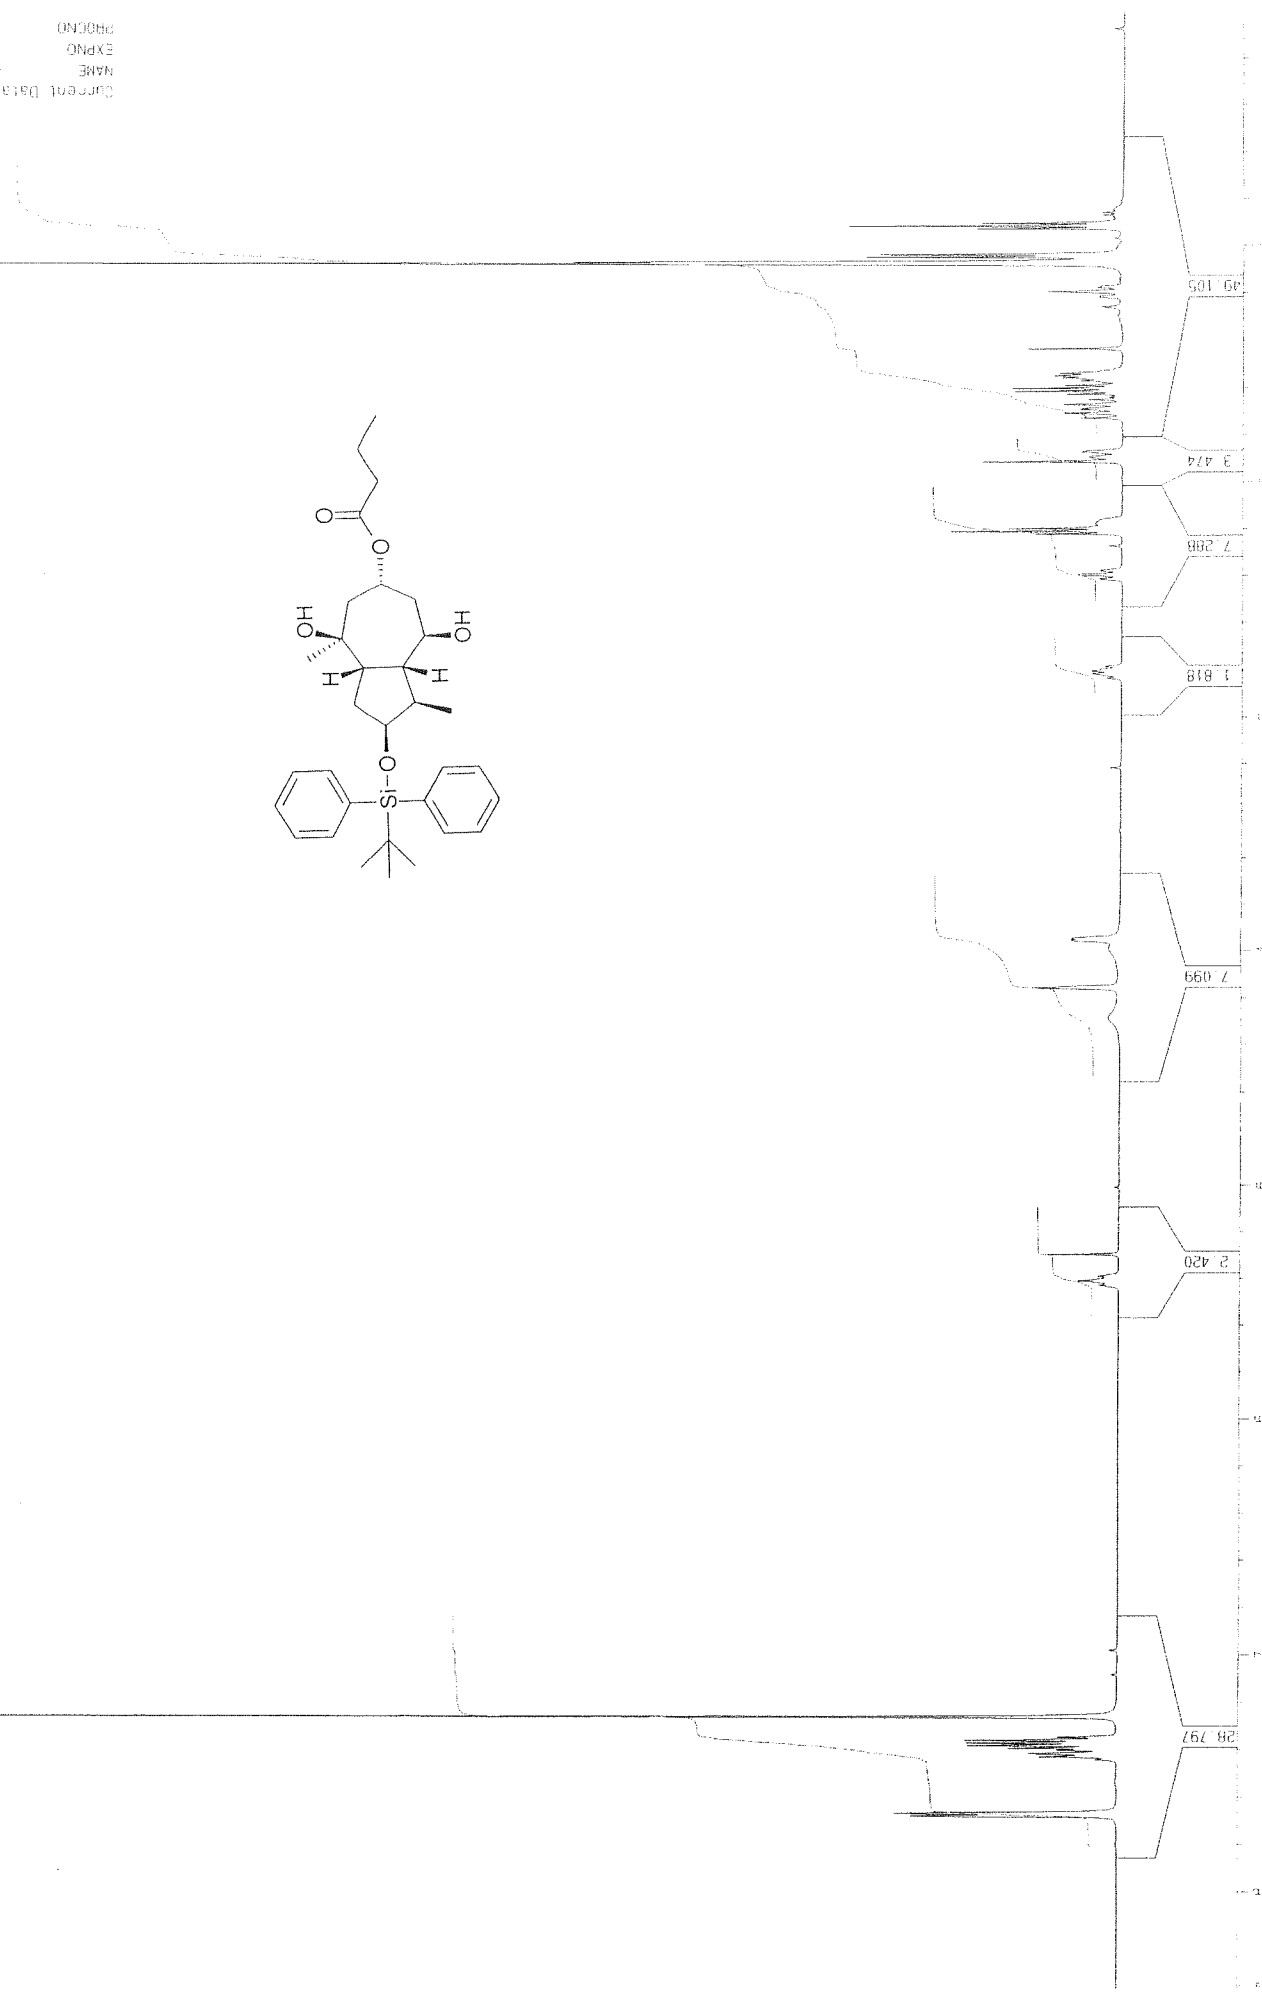



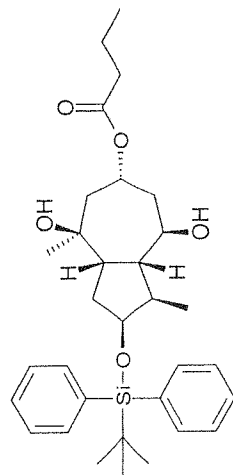

- 136.0
- 135.9
- 134.8
- 133.9
- 129.6
- 129.6
- 127.5
- 127.5

172.9

- 77.2
- 77.0
- 76.8
- 76.0
- 73.3
- 68.9
- 68.7

- 50.4
- 49.6
- 44.9
- 42.2
- 39.1
- 38.6
- 38.6
- 33.2
- 27.1
- 19.5
- 18.5
- 14.2
- 13.6

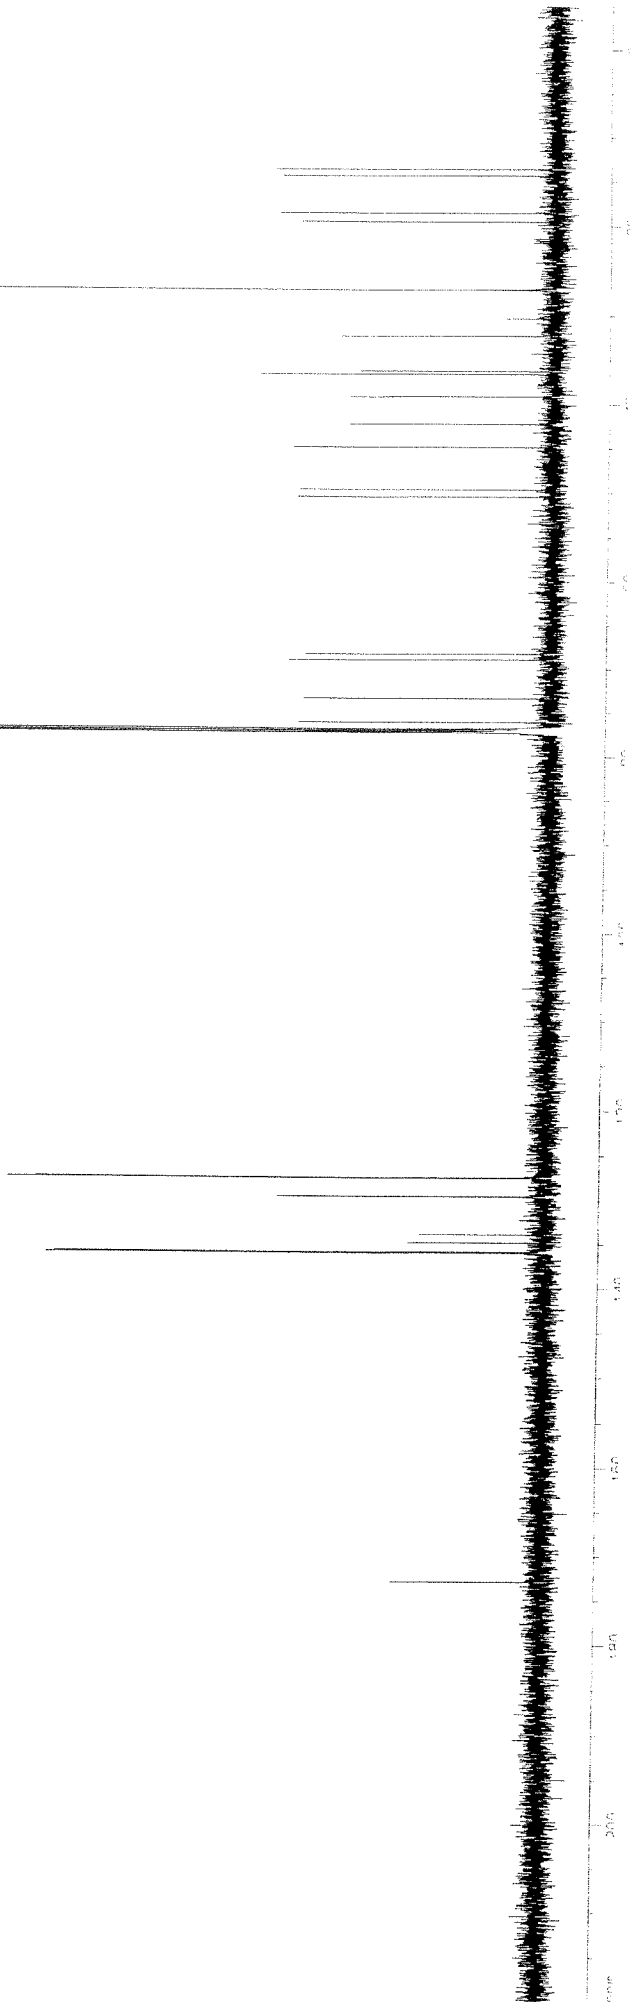

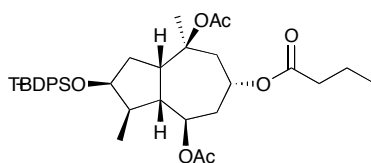

33

**Bis-acetate 33:** *p*-Toluenesulfonic acid (2 granules) was added to a solution of diol **32** (63.9 mg, 0.119 mmol) in neat isopropenyl acetate (1.6 mL) and the mixture stirred for 16 hours at room temperature. After this time the solution was quenched with aqueous ammonium chloride (10 mL) and extracted with EtOAc (4 × 20 mL). The combined organics were dried (MgSO<sub>4</sub>) and concentrated *in vacuo* to a yellow oil. This was purified by flash chromatography (SiO<sub>2</sub>, Et<sub>2</sub>O/petrol ether, 1:4) to yield the title compound as a clear oil, 64.1 mg, 87%; δ<sub>H</sub> (600 MHz; CDCl<sub>3</sub>) 7.68 – 7.66 (4H, m, *o*-Ph), 7.43 – 7.37 (6H, m, *m*-Ph, *p*-Ph), 5.14 – 5.09 (1H, m (br), H-8), 4.90 – 4.88 (1H, m (br), H-6), 4.20 – 4.17 (1H, m (br), H-3), 3.41 – 3.36 (1H, m (br), H-1), 2.43 (1H, dd, *J* 4.4, 13.8, H-9), 2.21 (2H, t (br), *J* 6.9, CH<sub>2</sub>CH<sub>2</sub>CH<sub>3</sub>), 2.12 – 2.06 (1H, m, H-7), 2.06, 2.04 (6H, 2 × s, O-6-C(O)CH<sub>3</sub> and O-10-C(O)CH<sub>3</sub>), 2.04 – 2.01 (1H, m, H-5), 1.79 – 1.73 (2H, m, H-7', H-9'), 1.70 – 1.65 (1H, m, H-4), 1.64 – 1.58 (2H, m, CH<sub>2</sub>CH<sub>2</sub>CH<sub>3</sub>), 1.53 (1H, dd, *J* 6.8, 11.8, H-2), 1.41 – 1.34 (1H, m, H-2'), 1.38 (3H, s, H-13), 1.13 (3H, d, *J* 6.7, H-14), 1.09 (9H, s, C(CH<sub>3</sub>)<sub>3</sub>), 0.91 (3H, t, *J* 7.3, CH<sub>2</sub>CH<sub>2</sub>CH<sub>3</sub>); δ<sub>C</sub> (150 MHz; CDCl<sub>3</sub>) δ 172.7 (O-8-C(O)), 170.1 (O-6-C(O), O-10-C(O)), 136.0 (*o*-Ph), 135.9 (*o*-Ph), 134.7 (*ipso*-Ph), 133.7 (*ipso*-Ph), 129.6 (*p*-Ph), 127.6 (*m*-Ph), 127.5 (*m*-Ph), 83.8 (C-10), 74.3 (C-3), 71.8 (C-6), 67.3 (C-8), 50.1 (C-5), 45.7 (C-1), 45.1 (C-4), 39.2 (C-9), 37.8 (C-2), 36.7 (C-7), 36.4 (CH<sub>2</sub>CH<sub>2</sub>CH<sub>3</sub>), 27.5 (C-13), 27.1 (C(CH<sub>3</sub>)<sub>3</sub>), 22.6, 21.4 (O-6-C(O)CH<sub>3</sub> and O-10-C(O)CH<sub>3</sub>), 19.4 (C(CH<sub>3</sub>)<sub>3</sub>), 18.3 (CH<sub>2</sub>CH<sub>2</sub>CH<sub>3</sub>), 15.2 (C-14), 13.6 (CH<sub>2</sub>CH<sub>2</sub>CH<sub>3</sub>); ν<sub>max</sub> (film; cm<sup>-1</sup>) 3663w, 2965m, 2933m, 1733s, 1457m, 1428m, 1367m, 1249s, 1181m, 1111m, 1074m, 1028m, 940w, 823w, 742w, 703m; [α]<sub>D</sub> +21.1 (*c.* 0.55, CHCl<sub>3</sub>); found (ESI<sup>+</sup>) [MNa]<sup>+</sup> 645.3243; C<sub>36</sub>H<sub>50</sub>O<sub>7</sub>NaSi requires *M*, 645.3224.

F2 - Acquisition Parameters  
 Date: 20060824  
 Time: 14:49  
 INSTRUM: SPECT  
 PULPROG: 5 mm Multis  
 2930

Current Data Parameters  
 NAME: M12-087A2  
 EXFNO: 1  
 PROCNO: 1

0.895  
 0.907  
 0.919  
 1.084  
 1.120  
 1.131  
 1.256  
 1.384  
 1.433  
 1.509  
 1.520  
 1.584  
 1.597  
 1.610  
 1.622  
 1.675  
 1.685  
 1.743  
 1.749  
 1.758  
 1.767  
 1.781  
 2.008  
 2.024  
 2.044  
 2.062  
 2.202  
 2.214  
 2.225  
 2.414  
 2.437

3.364  
 3.376  
 3.389

4.190

4.878  
 4.889  
 4.902  
 5.115

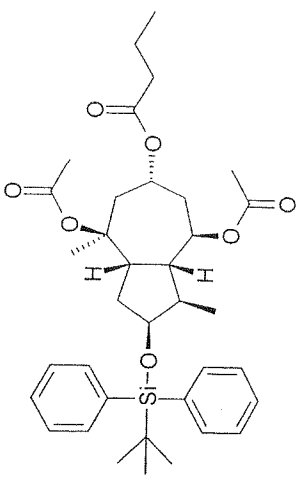

7.075  
 7.086  
 7.096  
 7.429  
 7.418  
 7.390  
 7.378  
 7.367  
 7.260

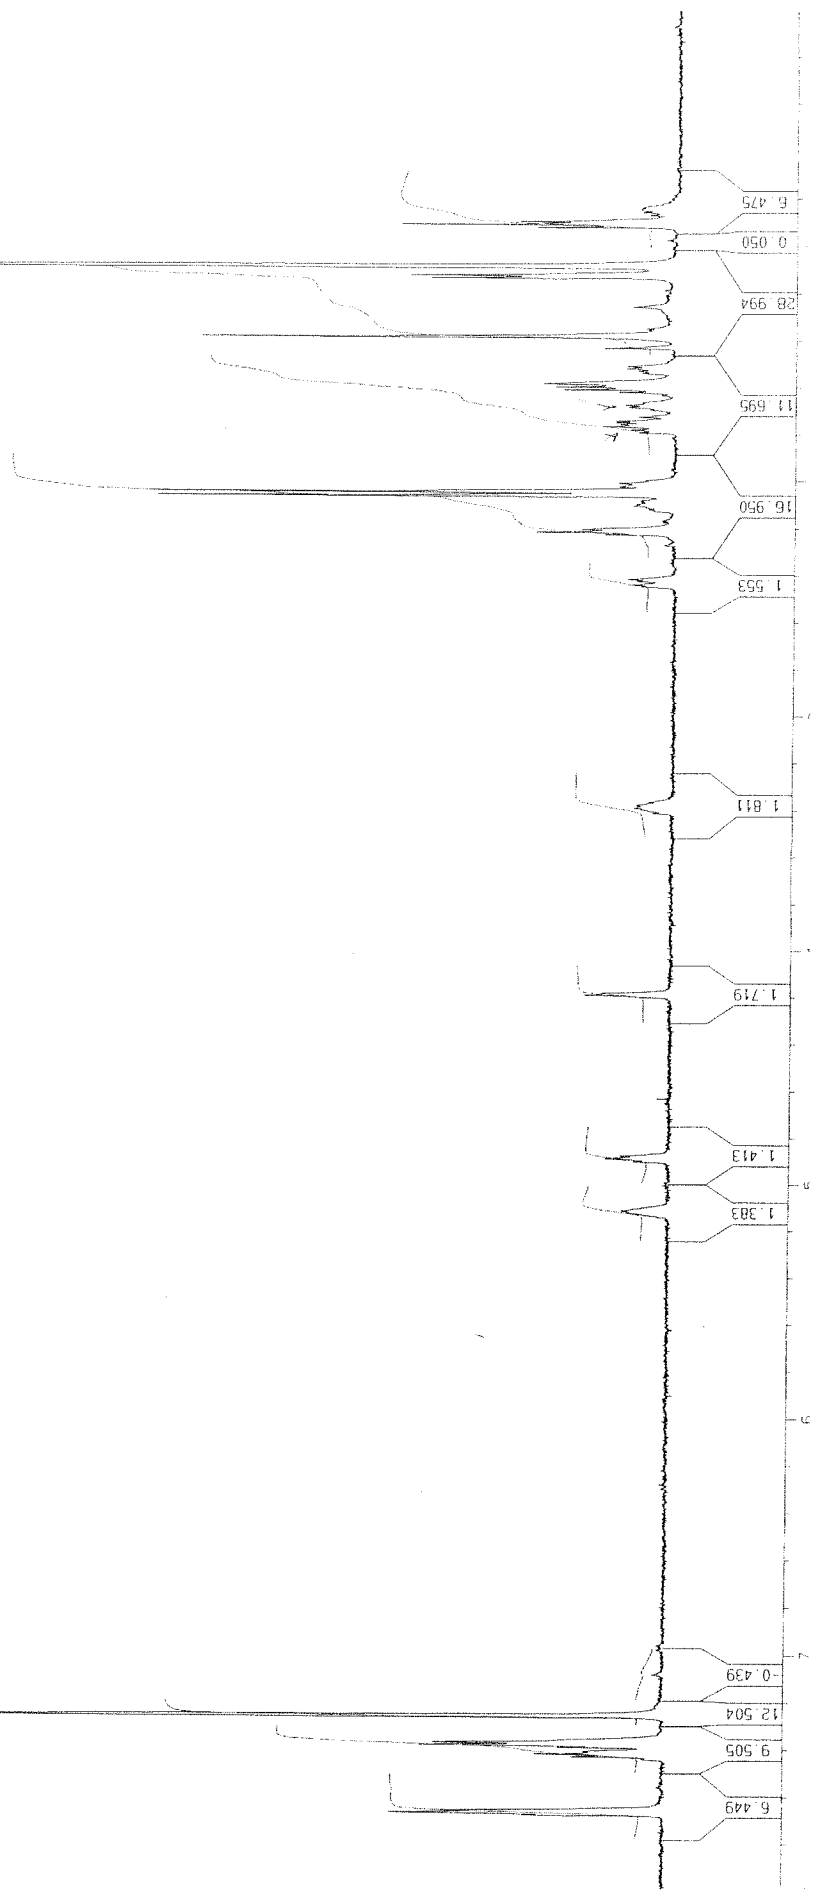

hanc 13C DRX-600

0.00

9.80  
10.20  
10.60  
11.00

11.40  
11.80  
12.20  
12.60

13.00  
13.40  
13.80  
14.20  
14.60  
15.00

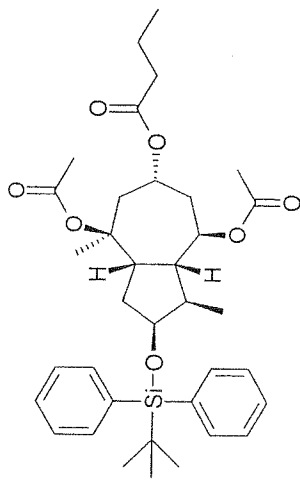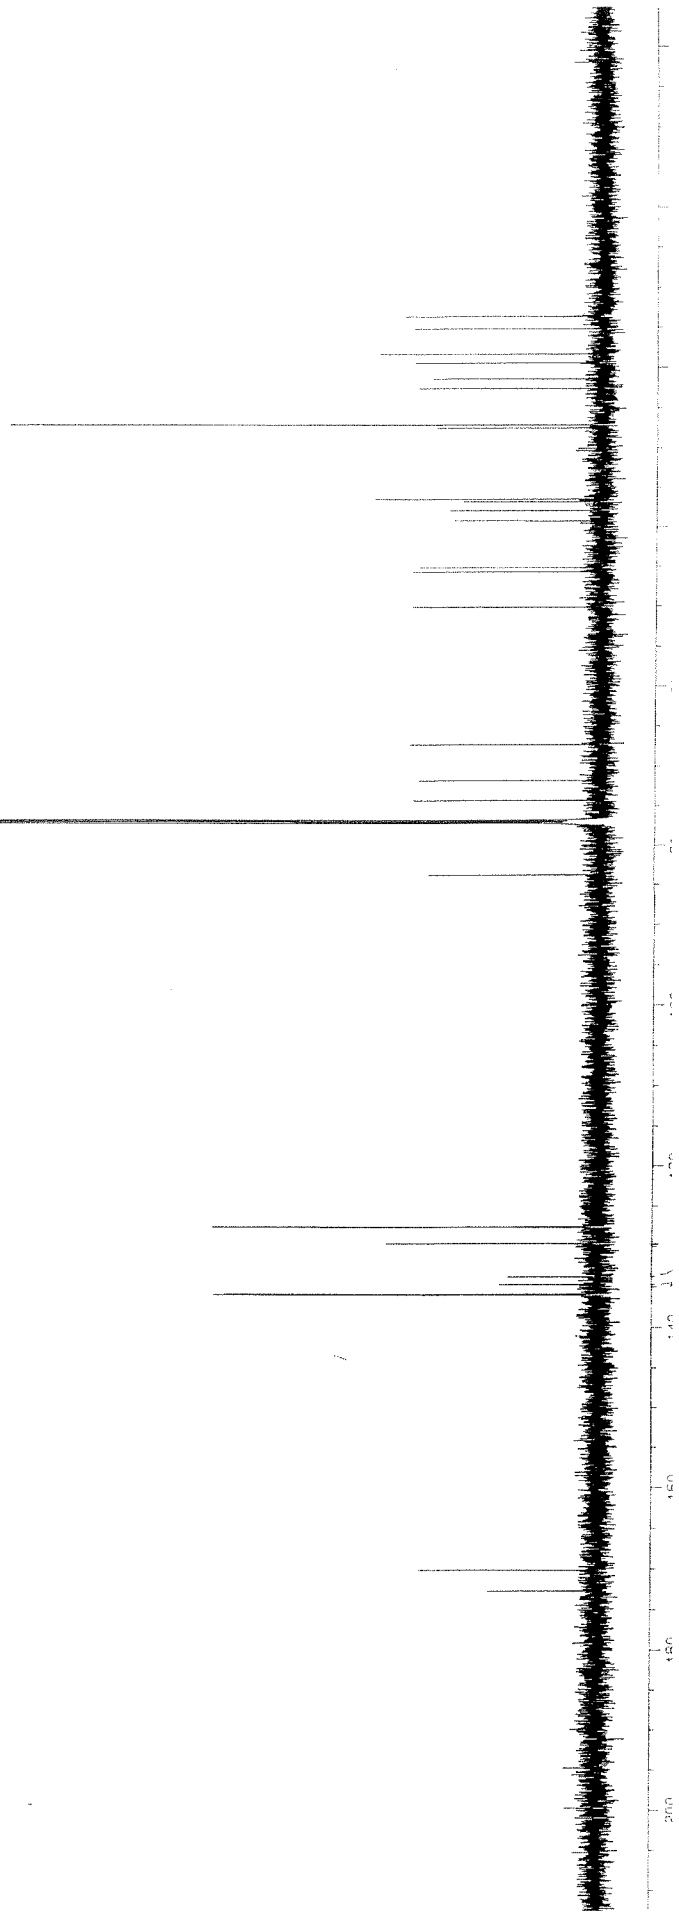

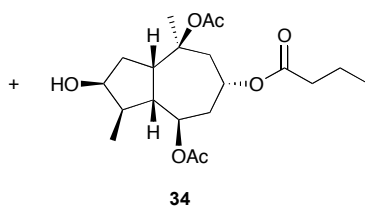

**Alcohol 34: 33** (7.6 mg, 0.0122 mmol) was dissolved in a 1 M solution of TBAF in THF (0.7 mL) and stirred at room temperature for 15.5 hours. The reaction mixture was quenched with water (5 mL) and extracted with EtOAc (4 × 5 mL). The combined organics were washed with brine (5 mL), dried (MgSO<sub>4</sub>) and concentrated *in vacuo* to a brown oil. This was purified by flash chromatography (SiO<sub>2</sub>, EtOAc/petrol ether, 1:3 to 1:1) to yield the title compound as a clear oil, 3.5 mg, 75%;  $\delta_{\text{H}}$  (600 MHz; CDCl<sub>3</sub>) 5.17 – 5.13 (1H, m, H-8), 4.98 (1H, dd, *J* 7.9, 7.9 H-6), 4.16 – 4.15 (1H, m (br), H-3), 3.27 (1H, ddd, *J* 3.8, 9.1, 16.0, H-1), 2.54 (1H, dd, *J* 5.3, 14.2, H-9), 2.26 (2H, ddd, *J* 2.2, 7.5, 7.5, CH<sub>2</sub>CH<sub>2</sub>CH<sub>3</sub>), 2.17 – 2.12 (1H, m, H-7), 2.06, 2.04 (6H, two s, O-6-C(O)CH<sub>3</sub>/O-10-C(O)CH<sub>3</sub>), 1.99 (1H, dd (br), *J* 7.2, 16.4, H-5), 1.92 (1H, dd, *J* 9.9, 14.2, H-9'), 1.87 (1H, dd, *J* 6.8, 14.6, H-7'), 1.83 – 1.81 (2H, m, H-2, H-4), 1.72 (1H, ddd, *J* 4.4, 13.0, 13.0, H-2'), 1.66 – 1.60 (2H, m, CH<sub>2</sub>CH<sub>2</sub>CH<sub>3</sub>), 1.55 (3H, s, H-13), 1.09 (3H, d, *J* 7.0, H-14), 0.94 (3H, t, *J* 7.4, CH<sub>2</sub>CH<sub>2</sub>CH<sub>3</sub>);  $\delta_{\text{C}}$  (150 MHz; CDCl<sub>3</sub>) 172.7 (O-8-C(O)CH<sub>2</sub>), 170.2, 170.1 (O-6-C(O)CH<sub>3</sub> and O-10-C(O)CH<sub>3</sub>), 83.9 (C-10), 73.0 (C-3), 71.9 (C-6), 67.3 (C-8), 49.7 (C-5), 46.1 (C-1), 44.5 (C-4), 39.1 (C-9), 37.8 (C-2), 37.0 (C-7), 36.5 (CH<sub>2</sub>CH<sub>2</sub>CH<sub>3</sub>), 27.4 (C-13), 22.5, 21.8 (O-6-C(O)CH<sub>3</sub> and O-10-C(O)CH<sub>3</sub>), 18.3 (CH<sub>2</sub>CH<sub>2</sub>CH<sub>3</sub>), 14.2 (C-14), 13.7 (CH<sub>2</sub>CH<sub>2</sub>CH<sub>3</sub>);  $\nu_{\text{max}}$  (film; cm<sup>-1</sup>) 3483w (br), 2966m, 2932m, 2873w, 1730s, 1457m, 1371m, 1249s, 1185m, 1121m, 1088w, 1064w, 1028m, 991m, 937w;  $[\alpha]_{\text{D}}$  +1.8 (*c.* 0.83, CHCl<sub>3</sub>); found (ESI+) [MNa]<sup>+</sup> 407.2036; C<sub>20</sub>H<sub>32</sub>O<sub>7</sub>Na requires *M*, 407.2046.

7.432  
7.260  
7.084

5.299  
5.171  
5.160  
5.155  
5.149  
5.144  
5.139  
5.128  
4.996  
4.983  
4.970

4.162  
4.155  
4.148

3.296  
3.280  
3.274  
3.269  
3.263  
3.247

2.537  
2.528  
2.277  
2.273  
2.265  
2.261  
2.249  
2.060  
2.042

1.935  
1.919  
1.818  
1.810  
1.806  
1.726  
1.661  
1.648  
1.636  
1.623  
1.611  
1.599  
1.546  
1.253  
1.100  
1.088  
0.951  
0.938  
0.926

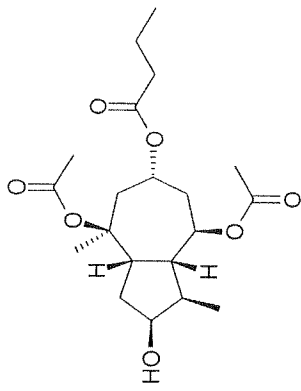

Current Data Parameters  
NAME MT3-001A2  
EXPNO 1  
PROCNO 1  
F2 - Acquisition Parameters  
Date\_ 20060826  
Time 20 02

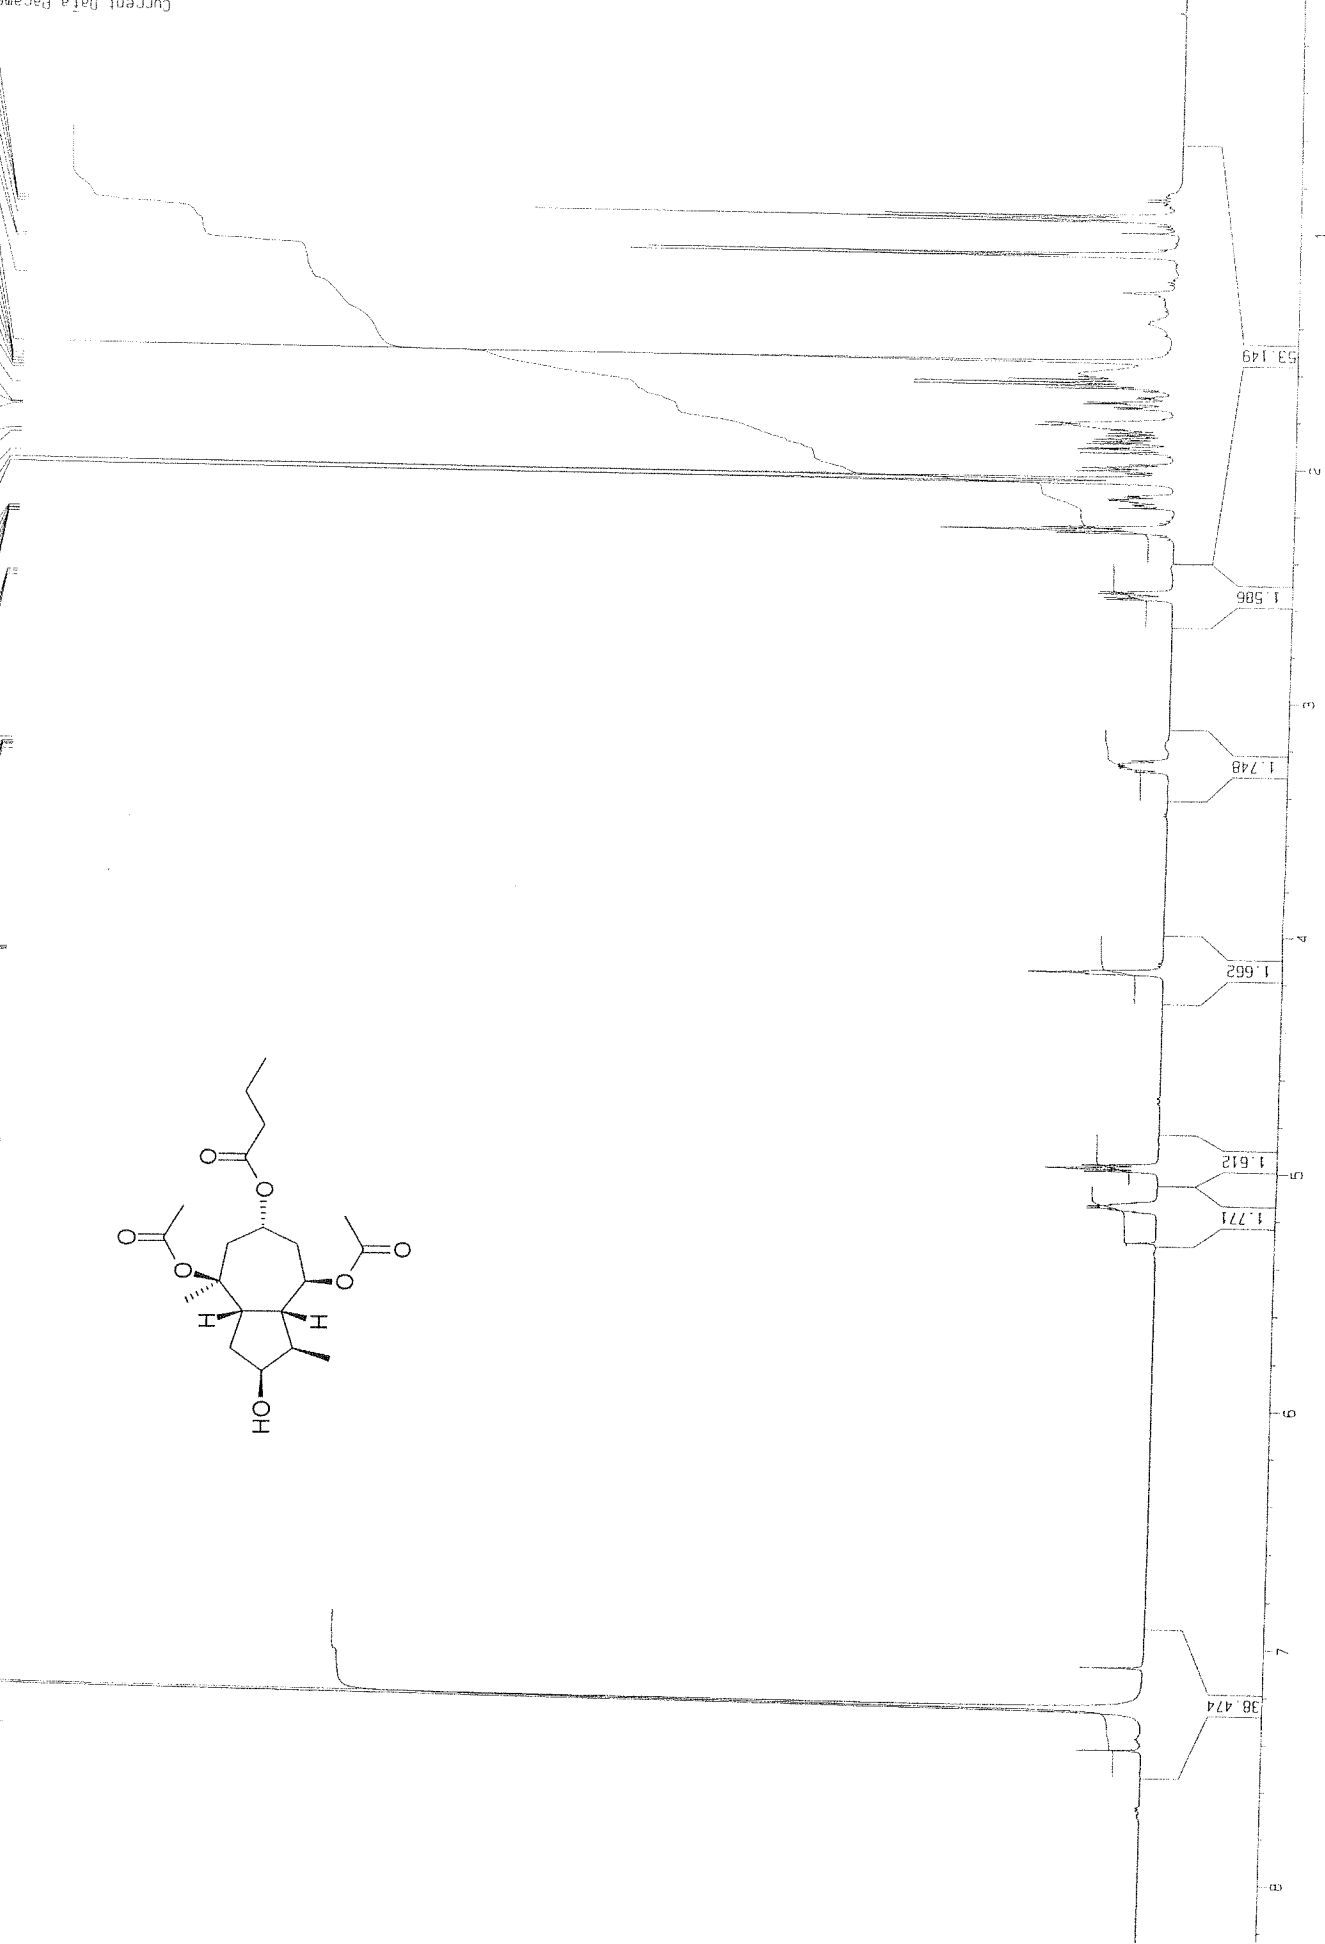

3.8474

1.771

1.612

1.662

1.748

1.586

5.3149

172.73  
170.19  
170.12

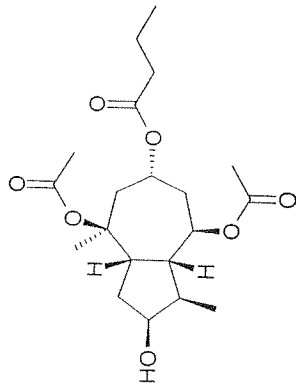

83.93  
77.21  
77.00  
76.79  
72.98  
71.86  
67.34  
49.73  
46.10  
44.46  
39.14  
37.80  
36.97  
36.46  
27.40  
22.51  
21.38  
18.34  
14.15  
13.67

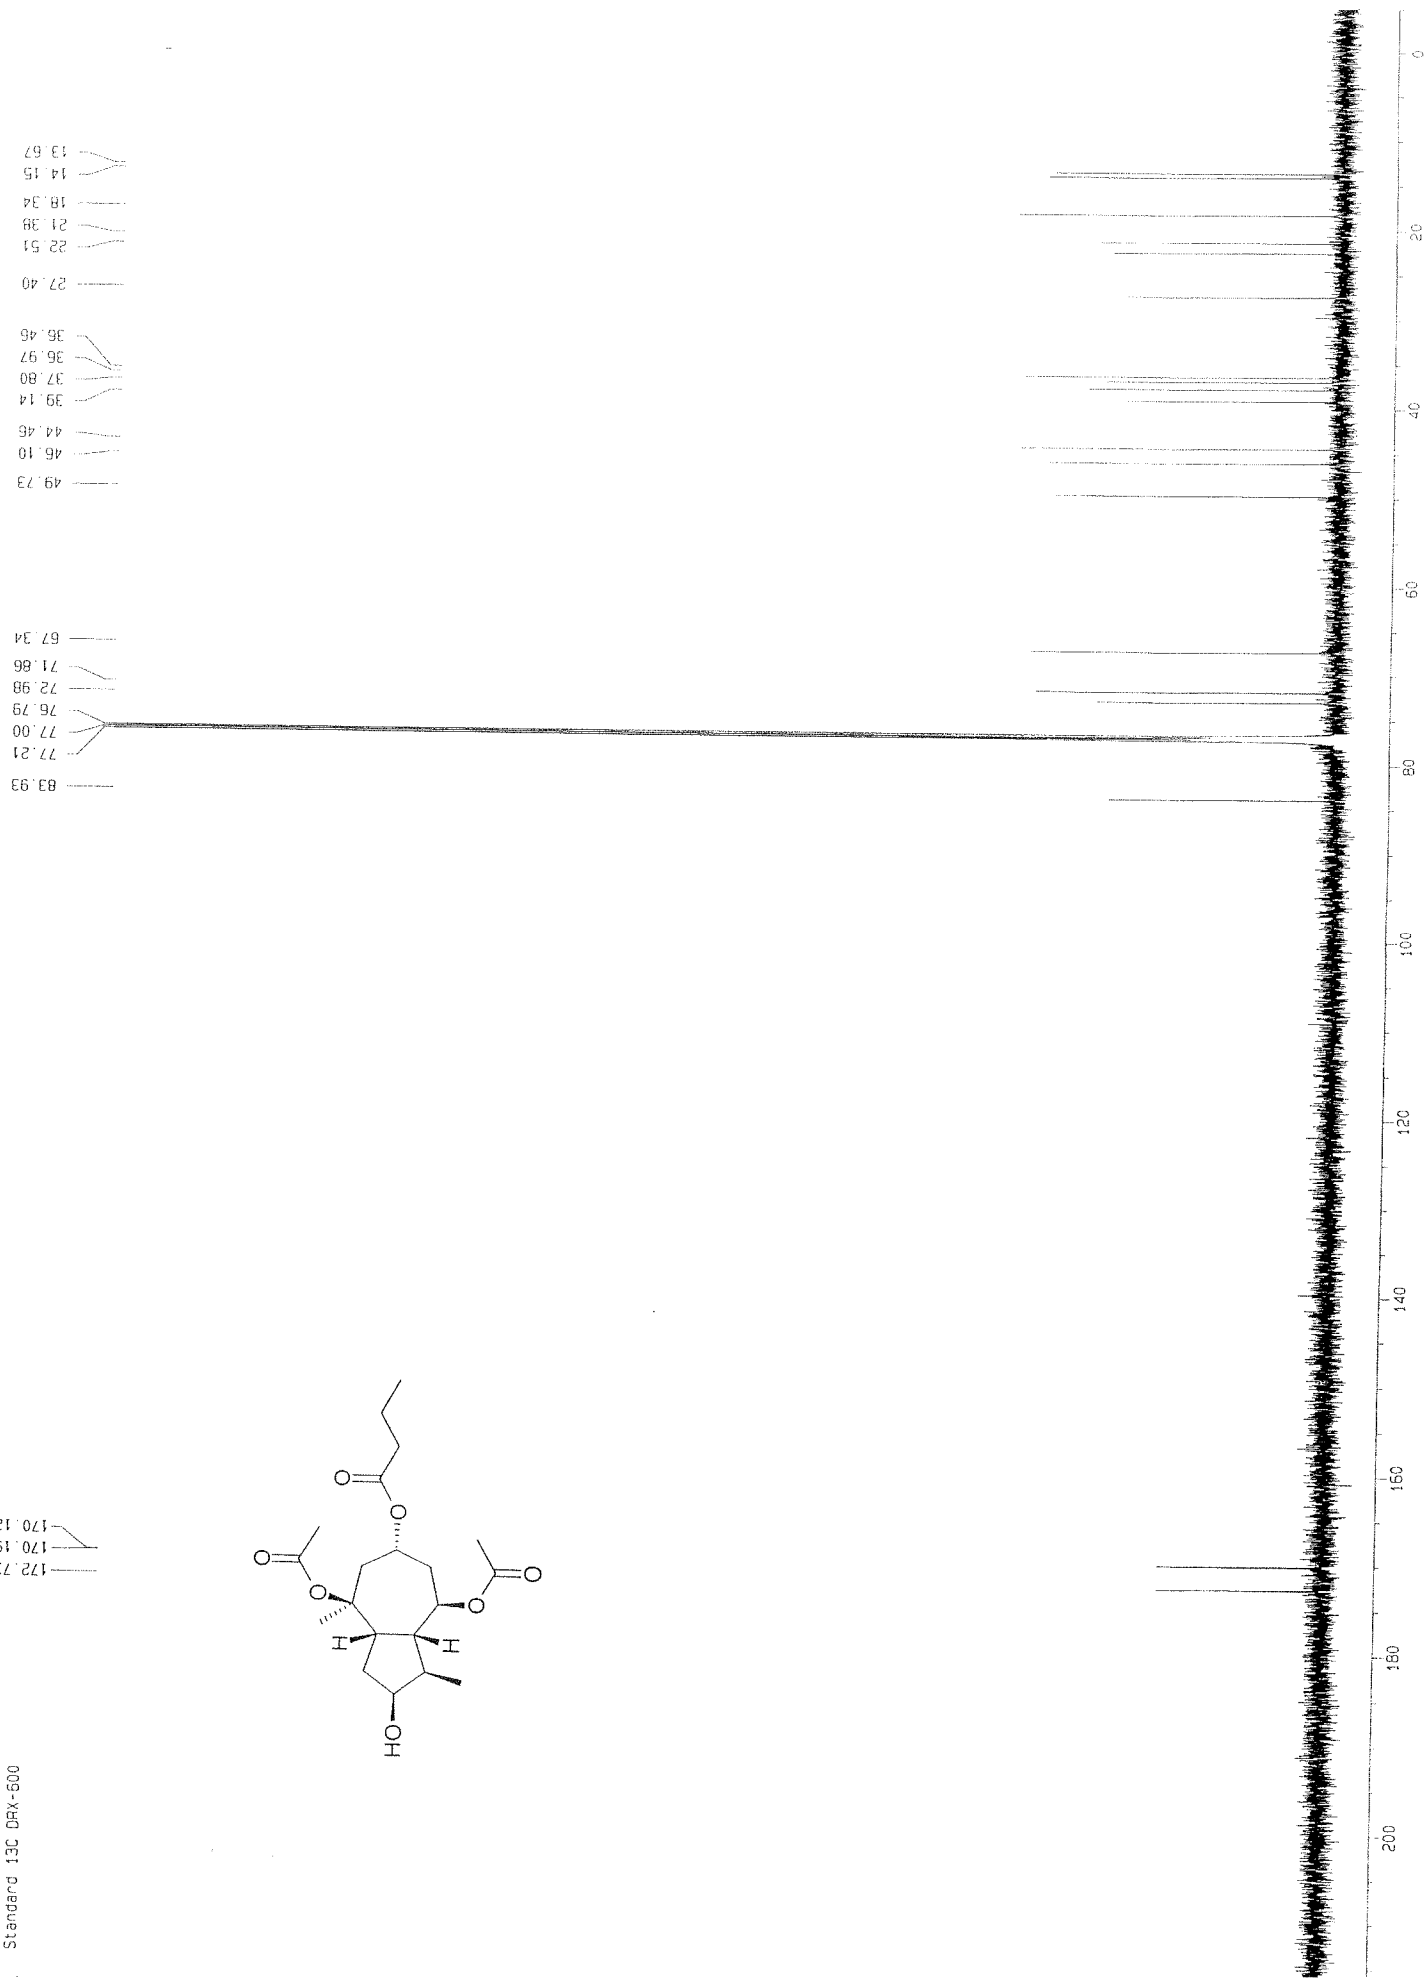

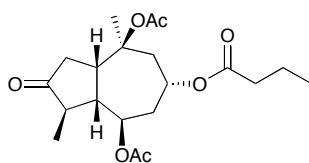

35

**Ketone 35:** A solution of alcohol **34** (11.4 mg, 0.0296 mmol) in  $\text{CH}_2\text{Cl}_2$  (0.33 mL) was treated with NMO (5.2 mg, 0.0444 mmol) and pre-dried 4 Å molecular sieves (20 mg). TPAP (1.0 mg, 0.0029 mmol) was added and the dark mixture stirred for 30 minutes. After this time the solution was directly applied to a pad of silica and eluted with 1:1 ethyl acetate/petrol to yield the title compound as a clear oil, 10.5 mg, 93%;  $\delta_{\text{H}}$  (600 MHz;  $\text{CDCl}_3$ ) 5.17 – 5.13 (1H, m, H-8), 5.01 (1H, dd (br),  $J$  10.1, 10.1, H-6), 3.34 (1H, dd (br),  $J$  9.5, 16.7, H-1), 2.62 (1H, dd,  $J$  6.9, 14.9, H-9), 2.36 – 2.25 (6H, m, H-2, H-4, H-5,  $\text{CH}_2\text{CH}_2\text{CH}_3$ ), 2.16 – 2.11 (2H, m, H-7), 2.09 – 2.02 (1H, m, H-9'), 2.04, 2.02 (6H, two s, O-6-C(O)CH<sub>3</sub>/O-10-C(O)CH<sub>3</sub>), 1.66 (2H, ddd,  $J$  7.4, 14.9, 14.9,  $\text{CH}_2\text{CH}_2\text{CH}_3$ ), 1.50 (3H, s, H-13), 1.16 (3H, d,  $J$  7.3, H-14), 0.94 (3H, t,  $J$  7.4,  $\text{CH}_2\text{CH}_2\text{CH}_3$ );  $\delta_{\text{C}}$  (150 MHz;  $\text{CDCl}_3$ ) 218.0 (C-3), 172.9 (O-8-C(O)CH<sub>2</sub>), 170.0, 169.8 (O-6-C(O)CH<sub>3</sub>/O-10-C(O)CH<sub>3</sub>), 83.9 (C-10), 70.2 (C-6), 67.2 (C-8), 50.5 (C-4), 47.5 (C-5), 42.7 (C-1), 39.5 (C-2), 38.5 (C-7), 37.9 (C-9), 36.4 ( $\text{CH}_2\text{CH}_2\text{CH}_3$ ), 26.5 (C-13), 22.3, 21.2 (O-6-C(O)CH<sub>3</sub>/O-10-C(O)CH<sub>3</sub>), 18.3 ( $\text{CH}_2\text{CH}_2\text{CH}_3$ ), 16.7 (C-14), 13.7 ( $\text{CH}_2\text{CH}_2\text{CH}_3$ );  $\nu_{\text{max}}$  (film;  $\text{cm}^{-1}$ ) 2966m, 2936m, 2877w, 1733s, 1455m, 1370m, 1233s, 1172m, 1129m, 1071m, 1028m, 973w, 950w;  $[\alpha]_{\text{D}}$  -5.9 (*c.* 0.51,  $\text{CHCl}_3$ ); found (ESI+)  $[\text{MNa}]^+$  405.1900;  $\text{C}_{20}\text{H}_{30}\text{O}_7\text{Na}$  requires  $M$ , 405.1889.



ppm

7.260

15.261

4.947

2.686

2.272

2.278

2.291

2.303

2.307

2.316

2.320

2.332

2.346

2.362

2.602

2.614

2.627

3.319

3.335

3.347

3.363

4.108

4.120

4.996

5.013

5.030

5.132

5.139

5.144

5.151

5.156

5.162

5.169

0.932

0.945

0.957

1.150

1.162

1.240

1.252

1.504

1.640

1.652

1.664

1.677

2.019

2.041

2.050

2.090

2.093

2.138

2.258

2.265

2.272

2.278

2.291

2.303

2.307

2.316

2.320

2.332

2.346

2.362

2.602

2.614

2.627

3.319

3.335

3.347

3.363

4.108

4.120

4.996

5.013

5.030

5.132

5.139

5.144

5.151

5.156

5.162

5.169

0.932

0.945

0.957

1.150

1.162

1.240

1.252

1.504

1.640

1.652

1.664

1.677

2.019

2.041

2.050

2.090

2.093

2.138

2.258

2.265

2.272

2.278

2.291

2.303

2.307

2.316

2.320

2.332

2.346

2.362

2.602

2.614

2.627

3.319

3.335

3.347

3.363

4.108

4.120

4.996

5.013

5.030

5.132

5.139

5.144

5.151

5.156

5.162

5.169

0.932

0.945

0.957

1.150

1.162

1.240

1.252

1.504

1.640

1.652

1.664

1.677

2.019

2.041

2.050

2.090

2.093

2.138

2.258

2.265

2.272

2.278

2.291

2.303

2.307

2.316

2.320

2.332

2.346

2.362

2.602

2.614

2.627

3.319

3.335

3.347

3.363

4.108

4.120

4.996

5.013

5.030

5.132

5.139

5.144

5.151

5.156

5.162

5.169

0.932

0.945

0.957

1.150

1.162

1.240

1.252

1.504

1.640

1.652

1.664

1.677

2.019

2.041

2.050

2.090

2.093

2.138

2.258

2.265

2.272

2.278

2.291

2.303

2.307

2.316

2.320

2.332

2.346

2.362

2.602

2.614

2.627

3.319

3.335

3.347

3.363

4.108

4.120

4.996

5.013

5.030

5.132

5.139

5.144

5.151

5.156

5.162

5.169

0.932

0.945

0.957

1.150

1.162

1.240

1.252

1.504

1.640

1.652

1.664

1.677

2.019

2.041

2.050

2.090

2.093

2.138

2.258

2.265

2.272

2.278

2.291

2.303

2.307

2.316

2.320

2.332

2.346

2.362

2.602

2.614

2.627

3.319

3.335

3.347

3.363

4.108

4.120

4.996

5.013

5.030

5.132

5.139

5.144

5.151

5.156

5.162

5.169

0.932

0.945

0.957

1.150

1.162

1.240

1.252

1.504

1.640

1.652

1.664

1.677

2.019

2.041

2.050

2.090

2.093

2.138

2.258

2.265

2.272

2.278

2.291

2.303

2.307

2.316

2.320

2.332

2.346

2.362

2.602

2.614

2.627

3.319

3.335

3.347

3.363

4.108

4.120

4.996

5.013

5.030

5.132

5.139

5.144

5.151

5.156

5.162

5.169

0.932

0.945

0.957

1.150

1.162

1.240

1.252

1.504

1.640

1.652

1.664

1.677

2.019

2.041

172.87  
169.99  
169.83

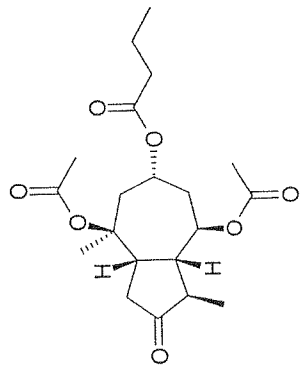

83.90  
77.21  
77.00  
76.79  
70.19  
67.20  
50.50  
47.45  
42.68  
39.41  
38.47  
37.93  
36.41  
26.53  
22.33  
21.15  
19.27  
16.67  
13.67

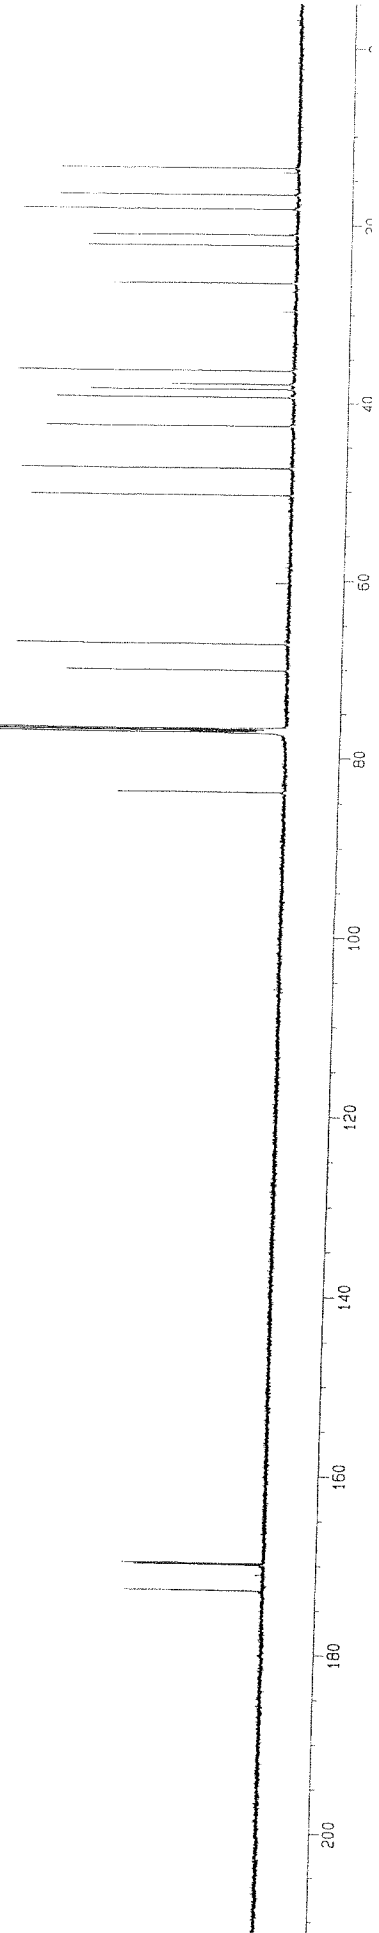

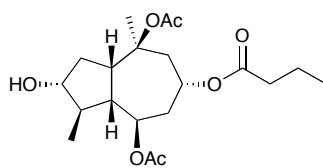

36

**Alcohol 36:** A solution of ketone **35** (9.5 mg, 0.0248 mmol) in MeOH (0.3 mL) at -30 °C was treated portionwise with sodium borohydride (9.4 mg, 0.248 mmol). The mixture was stirred for one hour then quenched with aqueous ammonium chloride (3 mL). After warming to room temperature the resulting solution was extracted with EtOAc (4 x 5 mL). The combined organics were washed with brine (5 mL), (MgSO<sub>4</sub>) and concentrated *in vacuo* to a clear oil. This was purified by flash chromatography (SiO<sub>2</sub>, EtOAc/petrol ether, 1:1) to yield the title compound as a clear oil, 8.4 mg, 88%, *R:S* ratio > 19:1;  $\delta_{\text{H}}$  (500 MHz; CDCl<sub>3</sub>) 5.18 – 5.13 (1H, m, H-8), 5.07 (1H, dd (br), *J* 8.2, 8.2, H-6), 3.76 – 3.65 (1H, m (br), H-3), 2.98 – 2.92 (1H, m, H-1), 2.48 (1H, dd, *J* 6.0, 14.3, H-9), 2.27 (2H, ddd, *J* 2.5, 7.5, 7.5, CH<sub>2</sub>CH<sub>2</sub>CH<sub>3</sub>), 2.17 – 1.93 (4H, m, H-2, H-7, H-9'), 2.05, 2.03 (6H, two s, O-6-C(O)CH<sub>3</sub>/O-10-C(O)CH<sub>3</sub>), 1.86 – 1.80 (1H, m, H-5), 1.69 – 1.54 (4H, m, H-2', H-4, CH<sub>2</sub>CH<sub>2</sub>CH<sub>3</sub>), 1.54 (3H, s, H-13), 1.11 (3H, d, *J* 6.9, H-14), 0.94 (3H, t, *J* 7.4, CH<sub>2</sub>CH<sub>2</sub>CH<sub>3</sub>);  $\delta_{\text{C}}$  (125 MHz; CDCl<sub>3</sub>) 172.9 (O-8-C(O)CH<sub>2</sub>), 170.3, 170.2 (O-6-C(O)CH<sub>3</sub>/O-10-C(O)CH<sub>3</sub>), 83.7 (C-10), 77.7 (C-3), 71.9 (C-6), 67.3 (C-8), 50.9 (C-5), 46.9 (C-4), 44.4 (C-1), 38.8 (C-9), 37.5, 37.5 (C-2/C-7), 36.4 (CH<sub>2</sub>CH<sub>2</sub>CH<sub>3</sub>), 27.7 (C-13), 22.5, 21.4 (O-6-C(O)CH<sub>3</sub>/O-10-C(O)CH<sub>3</sub>), 18.7 (C-14), 18.3 (CH<sub>2</sub>CH<sub>2</sub>CH<sub>3</sub>), 13.7 (CH<sub>2</sub>CH<sub>2</sub>CH<sub>3</sub>);  $\nu_{\text{max}}$  (film; cm<sup>-1</sup>) 3455w (br), 2966m, 2881m, 1728s, 1457w, 1371m, 1240s, 1180m, 1124w, 1067m, 1045m, 1027m, 941w;  $[\alpha]_{\text{D}}$  -23.5 (*c.* 0.38, CHCl<sub>3</sub>); found (ESI+) [MNa]<sup>+</sup> 407.2043; C<sub>20</sub>H<sub>32</sub>O<sub>7</sub>Na requires *M*, 407.2046.

Avance 500 1H Cryo  
 MT3-006A2  
 M. Tait - SVL

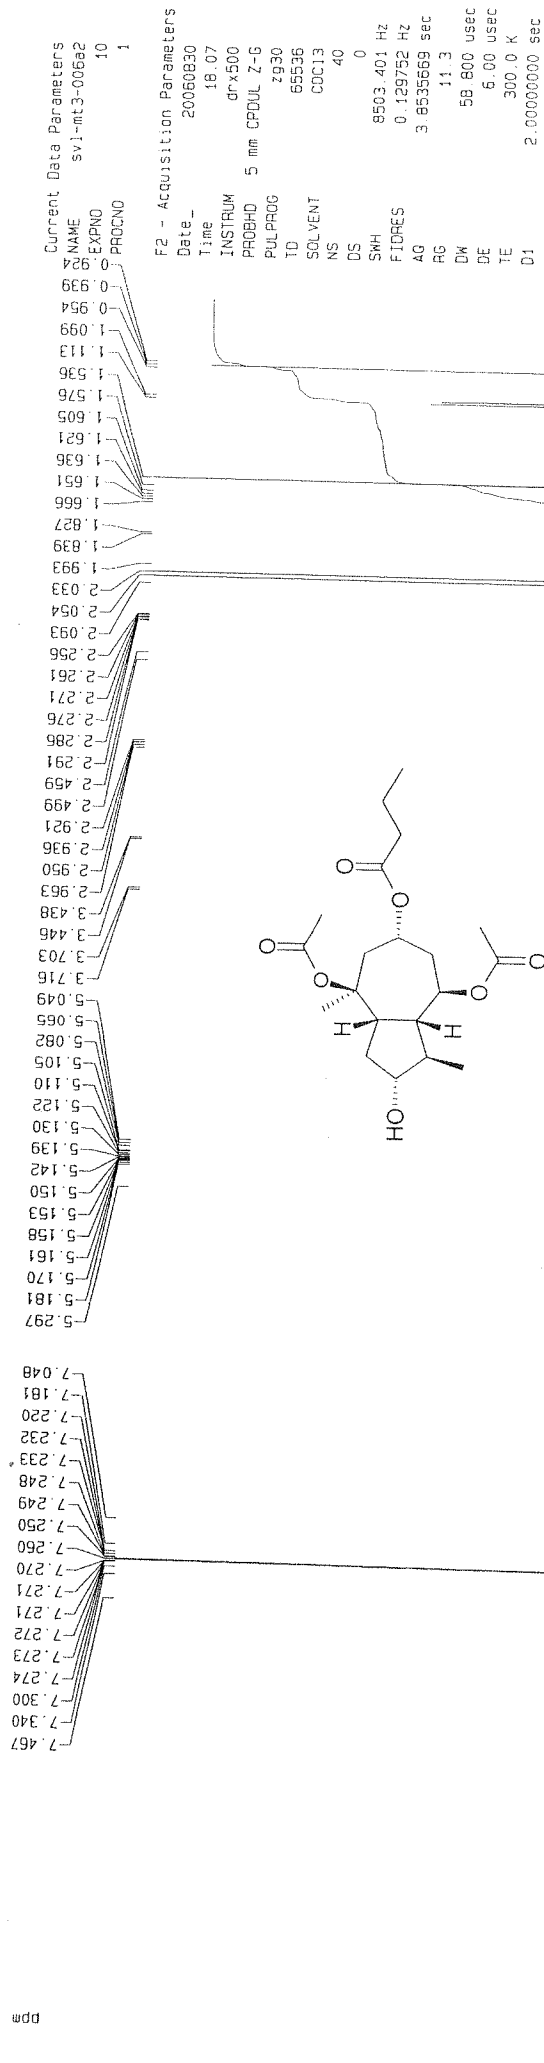

Integral

24.496  
 4.795  
 1.959  
 2.094  
 66.657

Avance 500 13C Cryo  
 MT3-006A2  
 M. Tait - SVL

ppm

172.9  
 170.3  
 170.2

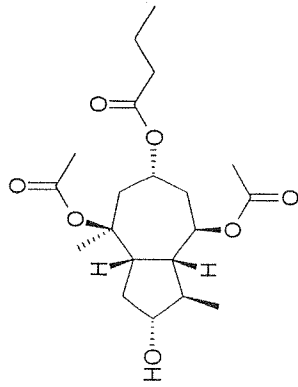

83.7  
 77.7  
 77.7  
 77.4  
 77.3  
 77.2  
 77.1  
 77.0  
 76.7  
 76.7  
 76.6  
 71.9  
 67.3  
 50.9  
 46.9  
 44.4  
 38.8  
 37.5  
 37.5  
 37.5  
 36.4  
 27.7  
 22.5  
 21.4  
 18.7  
 18.3  
 13.7

Current Date Parameters  
 NAME SVI-MT3-006a2  
 EXPNO 11  
 PROCNO 1

F2 - Acquisition Parameters  
 Date\_ 20060930  
 Time\_ 20.49  
 INSTRUM grx500  
 PROBHD 5 mm CPUL Z-G  
 PULPROG zgpg30  
 TD 65536  
 SOLVENT CDCl3  
 NS 2400  
 DS 8  
 SWH 34013.605 Hz  
 FIDRES 0.519006 Hz  
 AQ 0.9634292 sec  
 RG 4096  
 DW 14.700 usec  
 DE 6.00 usec  
 TE 300.0 K  
 D1 3.00000000 sec  
 D11 0.03000000 sec  
 DELTA 2.90000010 sec

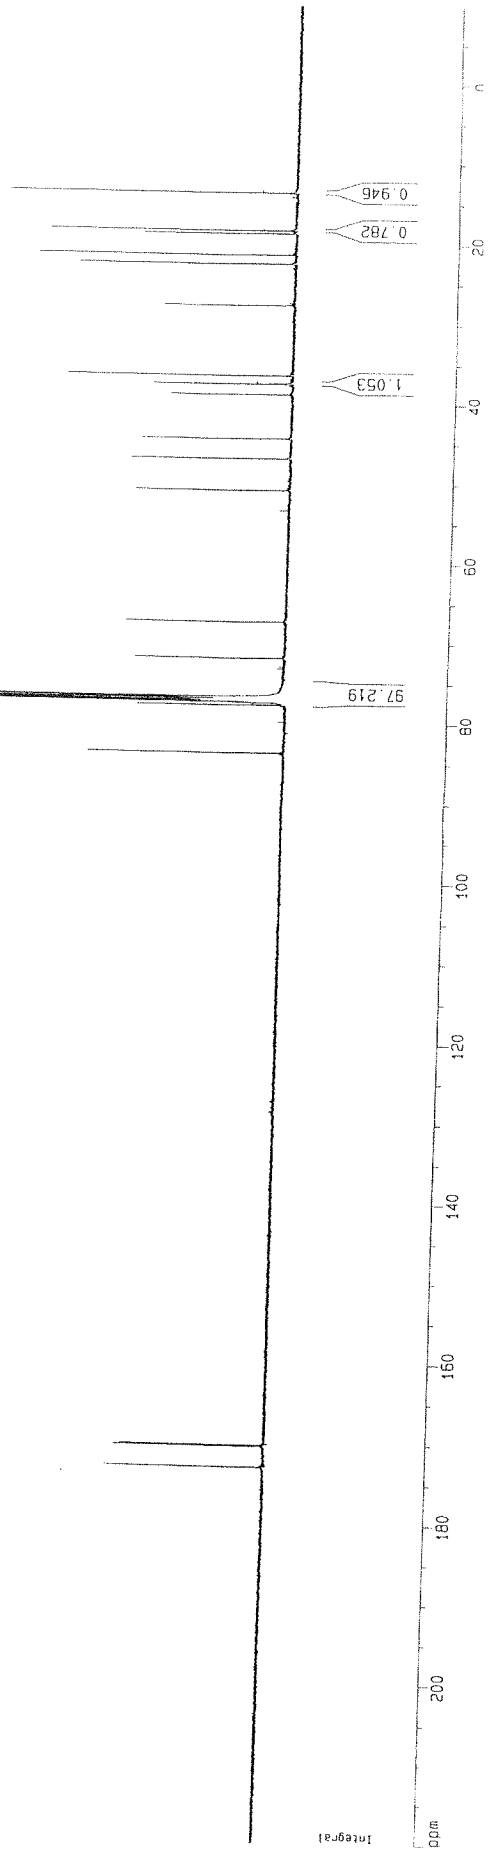

Integral

ppm

Standard 1H DRX-500

ppm

6.092  
6.090  
6.080  
6.078  
6.068  
6.066  
6.056  
6.054  
5.135  
5.132  
5.125  
5.120  
5.112  
5.109  
5.102  
5.054  
5.039  
5.024  
4.728  
4.716  
4.706  
4.695

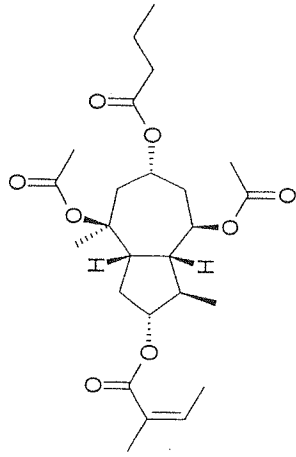

3.020  
3.007  
2.996  
2.985  
2.973  
2.527  
2.516  
2.297  
2.284  
2.274  
2.262  
2.091  
2.036  
2.026  
2.000  
1.989  
1.987  
1.977  
1.975  
1.961  
1.945  
1.937  
1.921  
1.884  
1.666  
1.654  
1.642  
1.629  
1.576  
1.542  
1.128  
1.116  
0.951  
0.939  
0.927  
0.853

Current Data Parameters  
NAME MT3-009A3  
EXPNO 1  
PROCNO 1  
F2 - Acquisition Parameters  
Date\_ 20060901  
Time 19.03

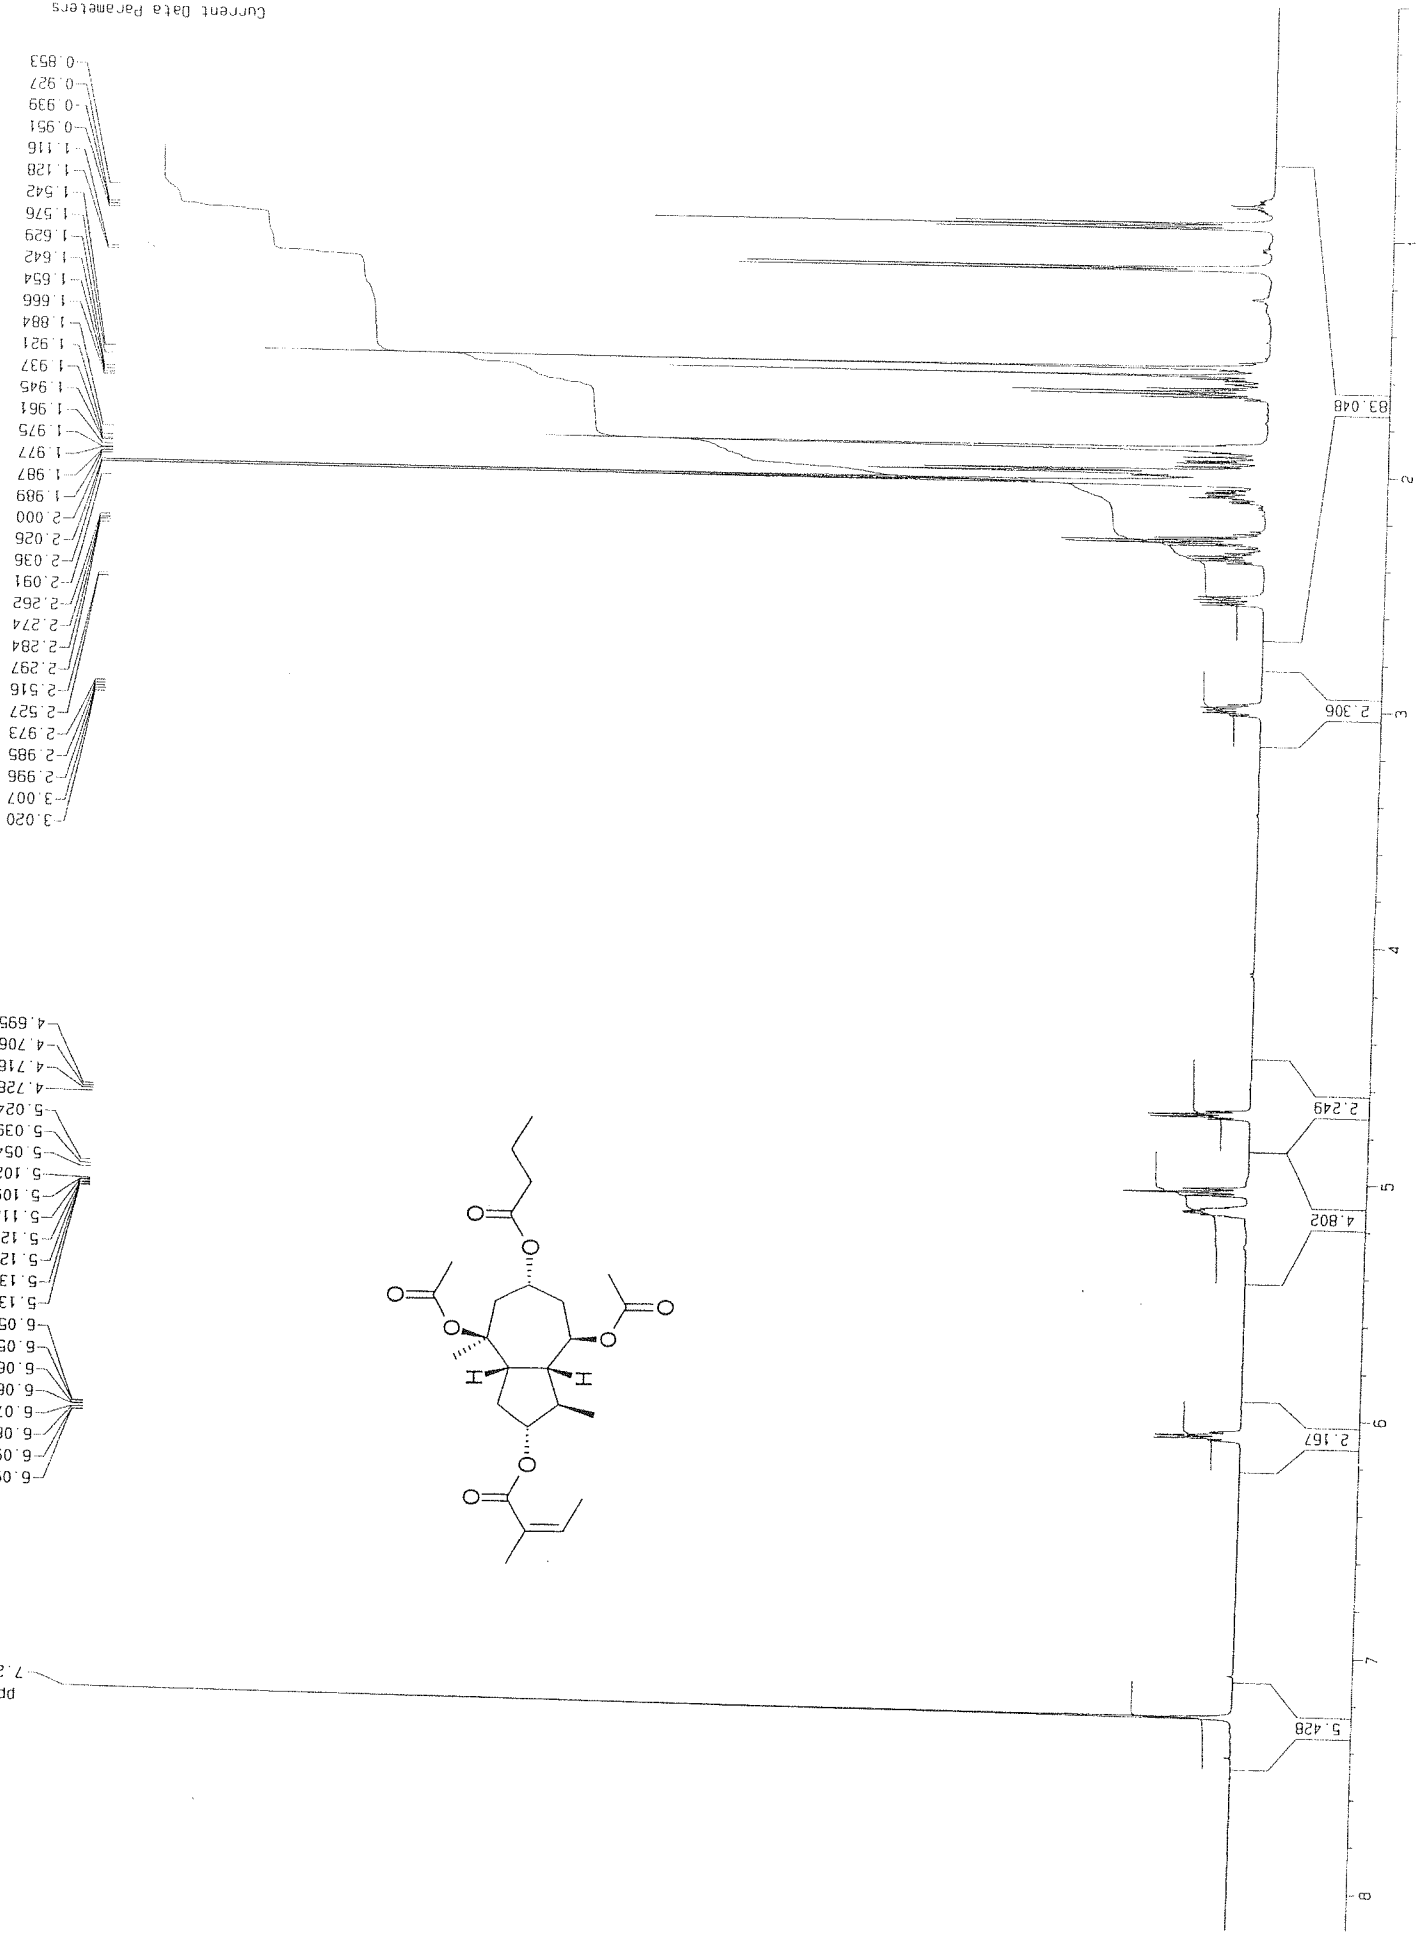

Standard 13C DRX-600

- 172.88
- 170.05
- 169.87
- 167.96

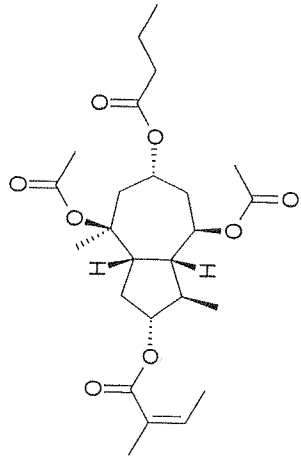

- 138.13
- 127.81

- 83.58
- 79.14
- 77.21
- 77.00
- 76.79
- 71.37
- 67.40

- 50.86
- 45.24
- 43.64
- 38.03
- 37.87
- 36.46
- 34.34
- 27.49
- 22.40
- 21.25
- 20.55
- 18.88
- 18.31
- 15.77
- 13.67

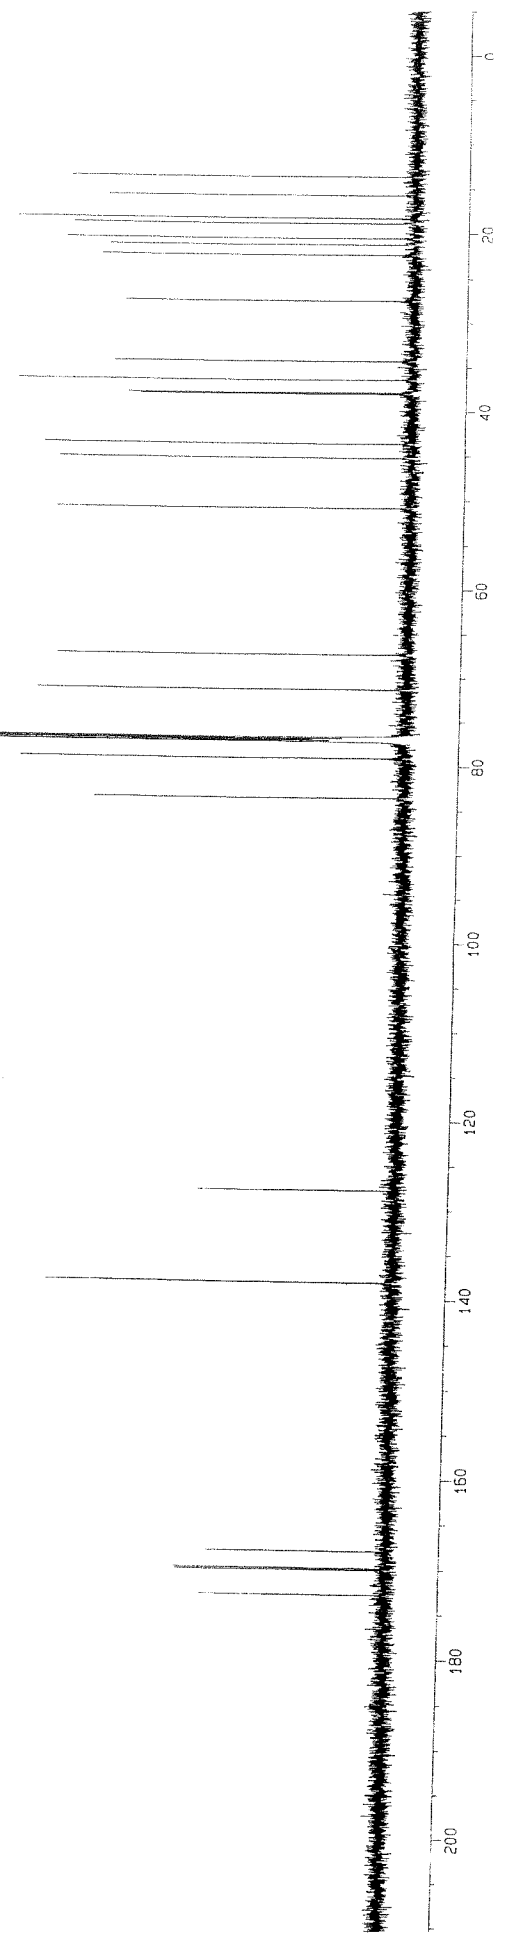

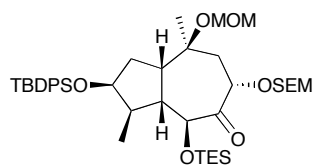

38

**SEM acetal 38:** Hünig's base (1.01 mL, 5.80 mmol), SEM-Cl (515  $\mu$ L, 2.91 mmol) and DMAP (18.0 mg, 145  $\mu$ mol) were added sequentially to a stirring solution of alcohol **12** (932 mg, 1.45 mmol) in  $\text{CH}_2\text{Cl}_2$  (5.0 mL) at room temperature. The resulting mixture was stirred at room temperature for 18 hours, then quenched with water (100 mL) and diluted with  $\text{CH}_2\text{Cl}_2$  (100 mL). The separated aqueous phase was extracted with  $\text{CH}_2\text{Cl}_2$  ( $2 \times 100$  mL) and the combined organic phases washed with brine (200 mL), dried ( $\text{MgSO}_4$ ) and concentrated *in vacuo*. Column chromatography ( $\text{SiO}_2$ ,  $\text{Et}_2\text{O}$ /petrol ether, 1:19 to 1:9) afforded the diol as a colourless oil, 1.11 g, quantitative;  $\delta_{\text{H}}$  (600 MHz;  $\text{CDCl}_3$ ) 7.66 (4H, m, *o*-Ph), 7.41 (2H, m, *p*-Ph), 7.37 (4H, m, *m*-Ph), 4.71 (1H, d,  $J$  7.3, O-10- $\text{CH}_2\text{O}$ ), 4.65 (1H, d,  $J$  7.3, O-10- $\text{CH}_2\text{O}$ ), 4.63 (1H, d,  $J$  6.8, O-10- $\text{CH}_2\text{O}$ ), 4.61 (1H, d,  $J$  6.8, O-10- $\text{CH}_2\text{O}$ ), 4.52 (1H, dd,  $J$  9.8, 7.0, H-8), 4.26 (1H, m, H-3), 4.17 (1H, d,  $J$  7.8, H-6), 3.66 (1H, ddd,  $J$  16.6, 9.8, 6.8,  $\text{SiCH}_2\text{CH}_2$ ), 3.53 (1H, ddd,  $J$  16.6, 9.8, 6.6,  $\text{SiCH}_2\text{CH}_2$ ), 3.34 (3H, s,  $\text{OCH}_3$ ), 2.88 (1H, ddd,  $J$  12.7, 7.8, 7.5, H-1), 2.12 (2H, m, H-4 and H-9), 1.96 (1H, dd,  $J$  12.7, 7.8, H-5), 1.67 (1H, dd,  $J$  14.3, 9.8, H-9'), 1.48 (1H, m, H-2), 1.33 (1H, ddd,  $J$  12.5, 12.5, 5.4, H-2'), 1.27 (3H, s, H-14), 1.14 (3H, d,  $J$  7.0, H-15), 1.08 (9H, s,  $\text{C}(\text{CH}_3)_3$ ), 0.92 (11H, m, H-17 and  $\text{Si}(\text{CH}_2\text{CH}_3)_3$ ), 0.55 (6H, m,  $\text{Si}(\text{CH}_2)_3$ ), 0.02 (9H, s,  $\text{Si}(\text{CH}_3)_3$ );  $\delta_{\text{C}}$  (150 MHz;  $\text{CDCl}_3$ ) 207.7 (C-7), 135.85 (*o*-Ph), 135.82 (*o*-Ph), 134.7 (*ipso*-Ph), 133. (*ipso*-Ph), 129.60 (*p*-Ph), 129.58 (*p*-Ph), 127.56 (*m*-Ph), 127.52 (*m*-Ph), 93.5 (O-8- $\text{CH}_2\text{O}$ ), 90.6 (O-10- $\text{CH}_2\text{O}$ ), 78.0 (C-10), 76.2 (C-6), 74.6 (C-8), 74.1 (C-3), 65.4 ( $\text{SiCH}_2\text{CH}_2$ ), 55.6 ( $\text{OCH}_3$ ), 51.7 (C-5), 45.9 (C-1), 42.9 (C-4), 37.6 (C-2), 37.5 (C-9), 29.6 (C-14), 27.0 ( $\text{C}(\text{CH}_3)_3$ ), 19.4 ( $\text{C}(\text{CH}_3)_3$ ), 18.0 ( $\text{SiCH}_2\text{CH}_2$ ), 15.4 (C-12), 6.7 ( $\text{Si}(\text{CH}_2\text{CH}_3)_3$ ), 4.6 ( $\text{Si}(\text{CH}_2)_3$ ), -1.4 ( $\text{Si}(\text{CH}_3)_3$ );  $\nu_{\text{max}}$  (film;  $\text{cm}^{-1}$ ) 2954 (C-H), 2878 (C-H), 1726 (C=O), 1460 (Ar), 1428 (Ar), 835 ( $\text{Si}(\text{CH}_3)_3$ );  $[\alpha]_{\text{D}}$  +4.06 (*c.* 1.33,  $\text{CHCl}_3$ ); found (ESI+)  $[\text{MNa}]^+$  793.4297;  $\text{C}_{42}\text{H}_{70}\text{O}_7$   $\text{Si}_3\text{Na}$  requires  $M$ , 793.4327.





ppm  
Standard  
13C DRX-600  
20.71

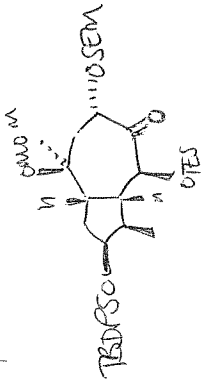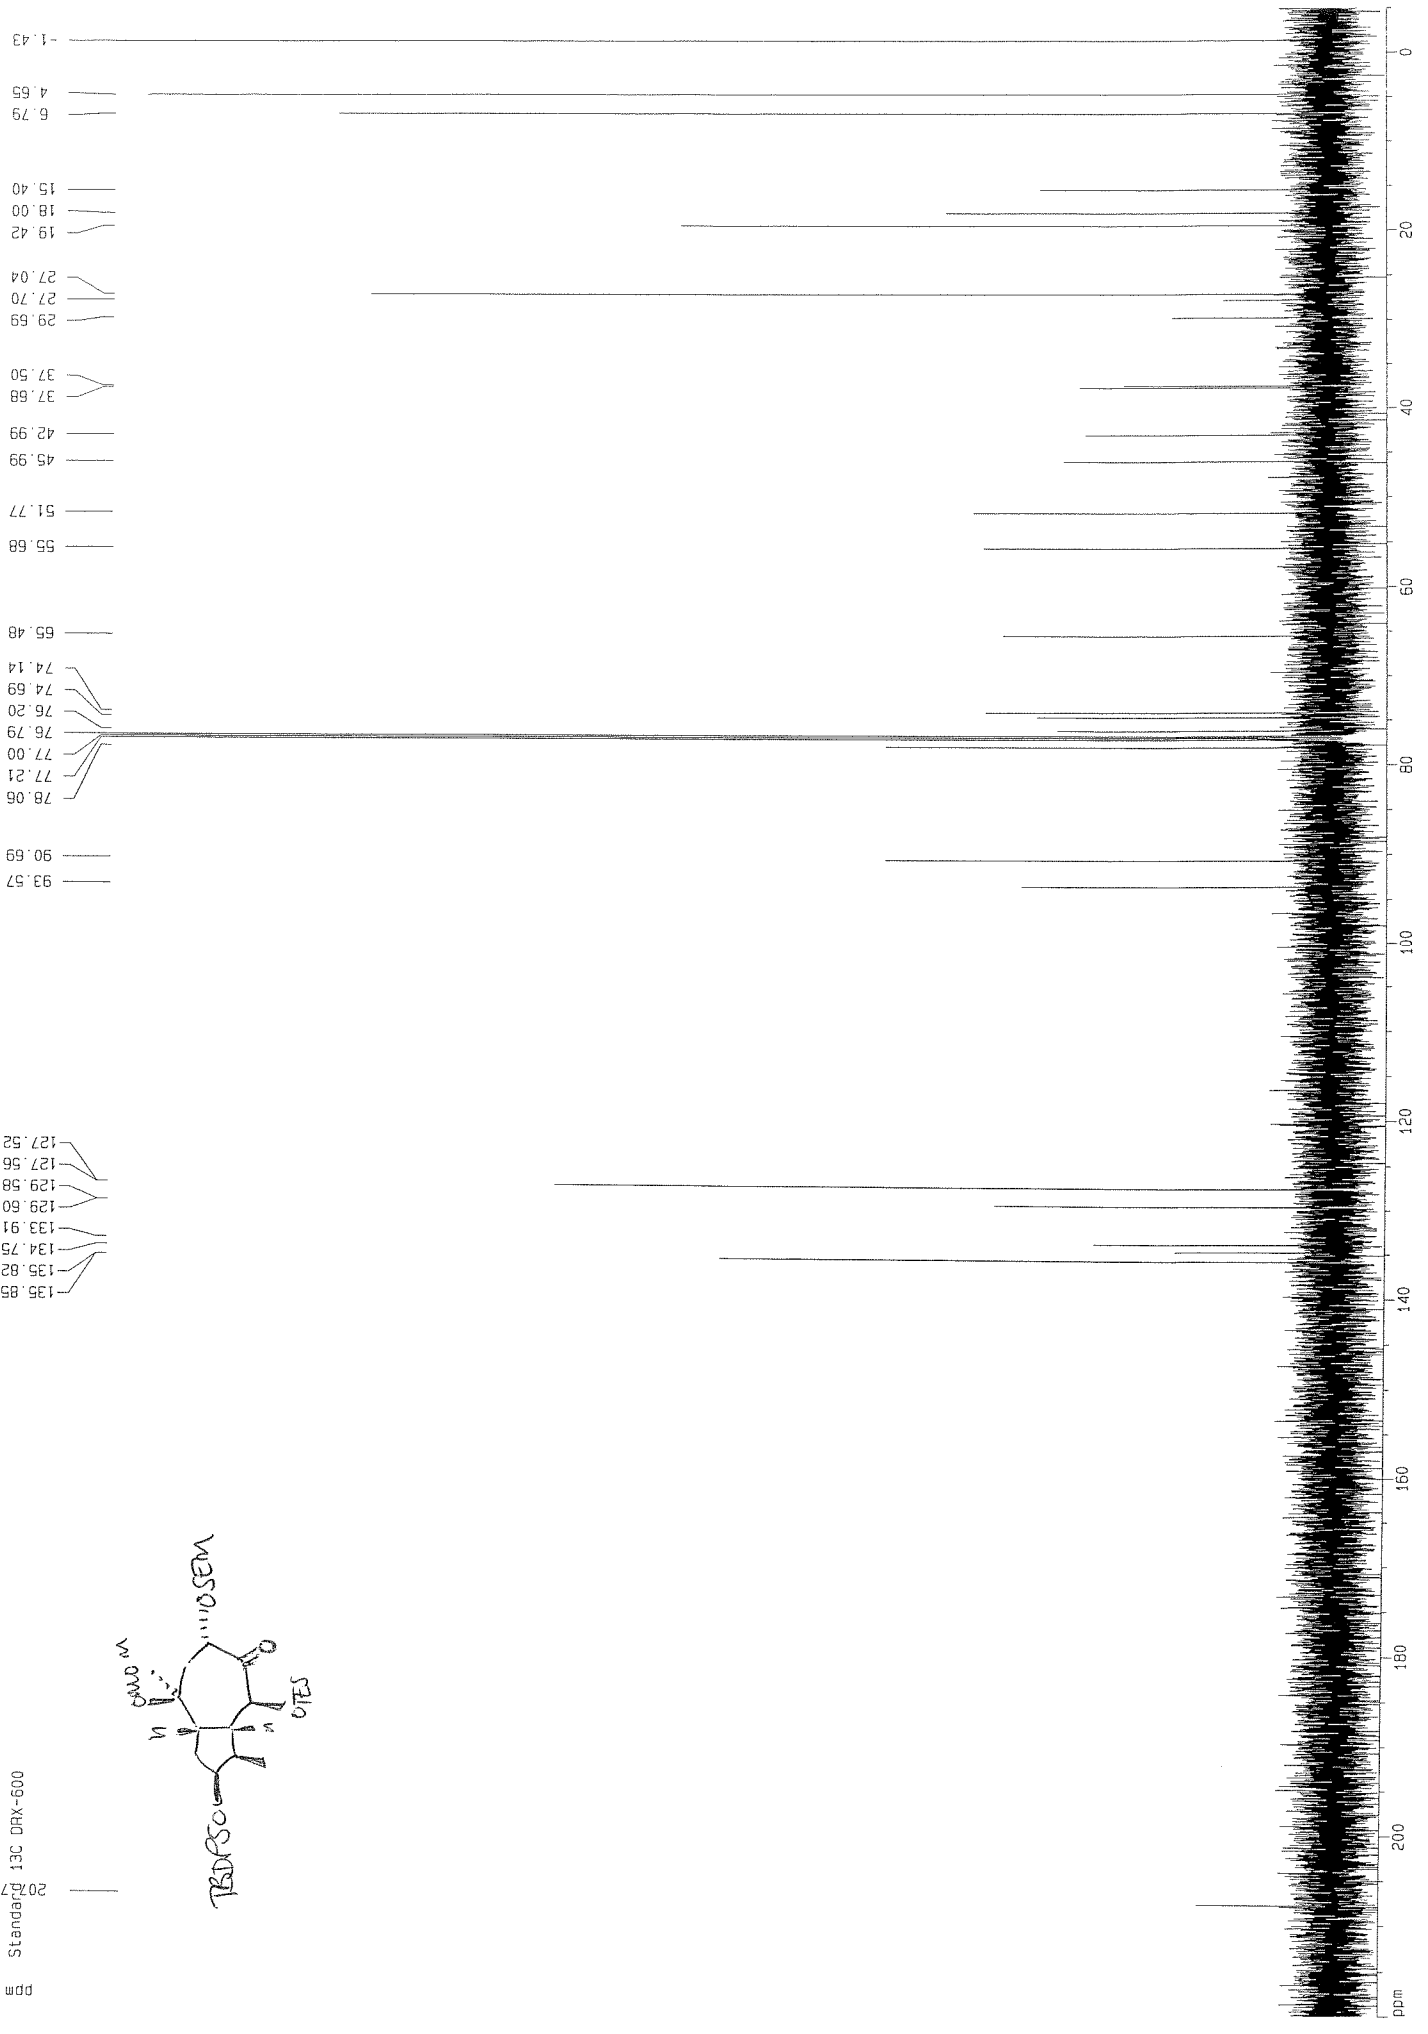

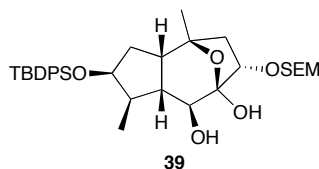

**Lactol 39:** Amberlyst 15 (10 mg) was added to a stirring suspension of the MOM ether **38** (50.9 mg, 66.0  $\mu\text{mol}$ ) and 4 Å molecular sieves (100 mg) in MeOH (1.0 mL). After stirring at room temperature for 4 hours, the reaction was quenched with sodium bicarbonate solution (5 mL) and filtered then the solid was washed with H<sub>2</sub>O (10 mL) and Et<sub>2</sub>O (20 mL). The separated aqueous phase was extracted with Et<sub>2</sub>O (2  $\times$  20 mL) and the combined organic phases were washed with brine, dried (MgSO<sub>4</sub>) and concentrated *in vacuo*. Column chromatography (SiO<sub>2</sub>, Et<sub>2</sub>O/petrol ether, 1:4) afforded the acetal as a colourless oil, 23 mg, 57%;  $\delta_{\text{H}}$  (600 MHz; CDCl<sub>3</sub>) 7.67 (4H, m, *o*-Ph), 7.44 (2H, *p*-Ph), 7.38 (4H, *m*-Ph), 4.71 (1H, d, *J* 6.6, O-8-CH<sub>2</sub>O), 4.64 (1H, d, *J* 6.6, O-8-CH<sub>2</sub>O), 4.55 (1H, br s, OH), 4.21 (1H, dd, *J* 4.0, 3.9, H-3), 4.18 (1H, dd, *J* 11.7, 4.8, H-8), 3.79 (1H, d, *J* 8.1, H-6), 3.56 (2H, t, *J* 8.4, SiCH<sub>2</sub>CH<sub>2</sub>), 2.44-2.37 (2H, m, H-1 and H-5), 2.25 (1H, d, *J* 8.1, OH), 2.10 (1H, m, H-4), 1.87 (1H, dd, *J* 13.9, 11.7, H-9), 1.73 (1H, dd, *J* 14.6, 8.7, H-2), 1.65 (1H, dd, *J* 13.9, 4.8, H-9'), 1.12 (3H, s, H-11), 1.09 (9H, s, C(CH<sub>3</sub>)<sub>3</sub>), 1.08 (1H, m, H-2') 1.07 (3H, d, *J* 7.0, H-15), 0.87 (2H, m, SiCH<sub>2</sub>CH<sub>2</sub>), 0.00 (9H, s, Si(CH<sub>3</sub>)<sub>3</sub>);  $\delta_{\text{C}}$  (150 MHz; CDCl<sub>3</sub>) 135.9 (*o*-Ph), 135.8 (*o*-Ph), 134.95 (*ipso*-Ph), 133.91 (*ipso*-Ph), 129.58 (*p*-Ph), 129.54 (*p*-Ph), 127.5 (*m*-Ph), 127.4 (*m*-Ph), 102.8 (C-7), 94.8 (OCH<sub>2</sub>O), 82.2 (C-10), 79.5 (C-8), 77.4 (C-3), 68.6 (C-6), 65.6 (SiCH<sub>2</sub>CH<sub>2</sub>), 50.4 (C-5), 42.4 (C-1), 42.3 (C-4), 36.3 (C-2), 36.2 (C-9), 27.1 (C-14), 27.0 (C(CH<sub>3</sub>)<sub>3</sub>), 19.5 (C(CH<sub>3</sub>)<sub>3</sub>), 18.0 (SiCH<sub>2</sub>CH<sub>2</sub>), 13.0 (C-15), -1.5 (Si(CH<sub>3</sub>)<sub>3</sub>);  $\nu_{\text{max}}$  (film; cm<sup>-1</sup>) 3426 (br OH), 2929 (C-H), 2857 (C-H), 1589 (w Ar), 834 (Si(CH<sub>3</sub>)<sub>3</sub>);  $[\alpha]_{\text{D}}^{25} +27.8$  (*c.* 1.19, CHCl<sub>3</sub>); found (ESI+) [MNa]<sup>+</sup> 635.3185; C<sub>34</sub>H<sub>52</sub>O<sub>6</sub>Si<sub>2</sub>Na requires *M*, 635.3200.

Standard 1H DRX-600  
sa4054

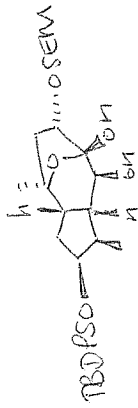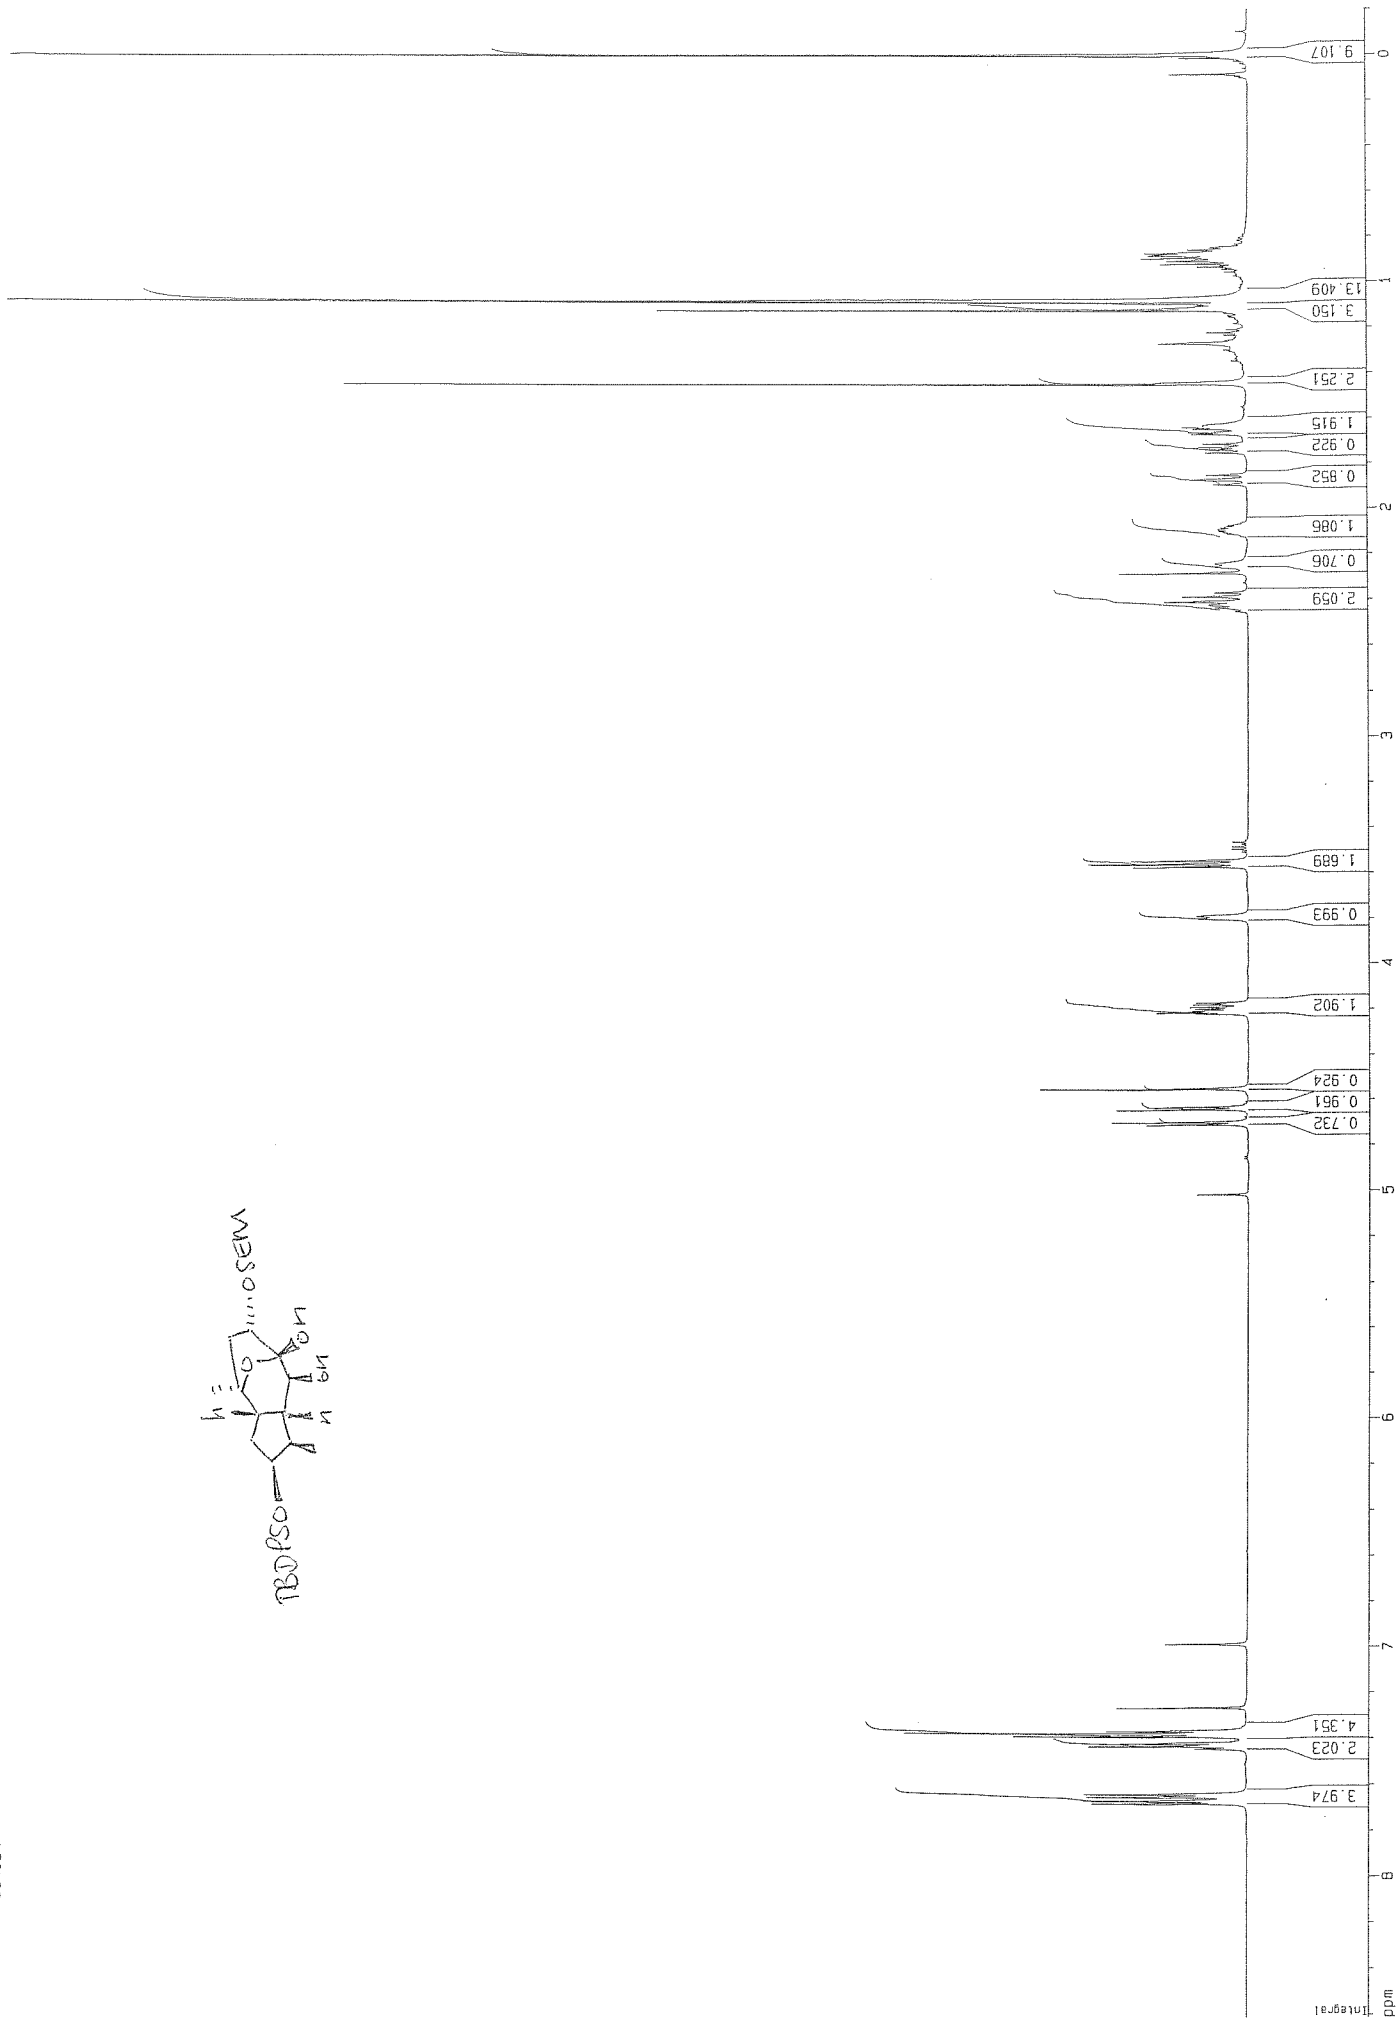

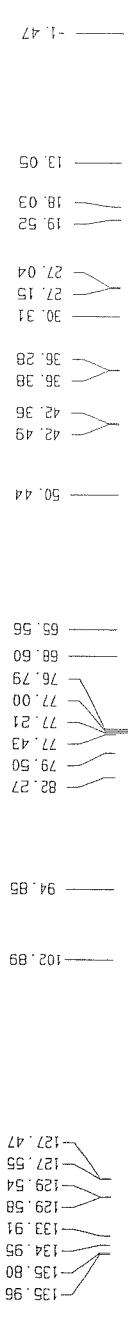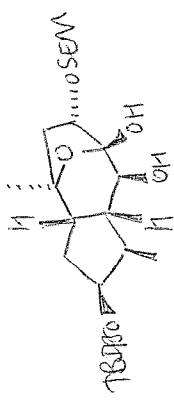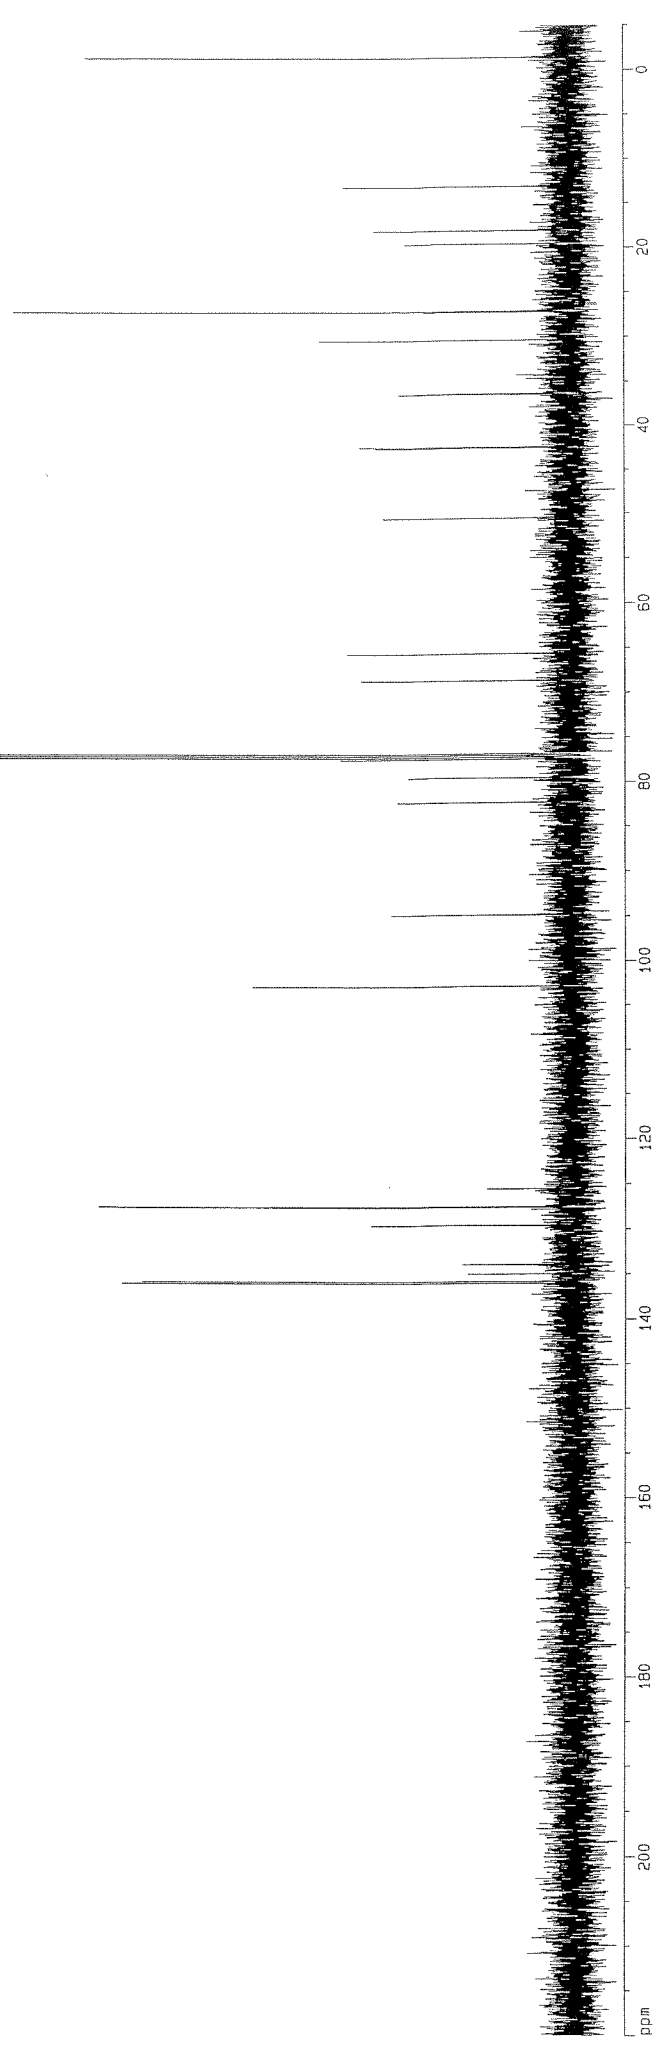

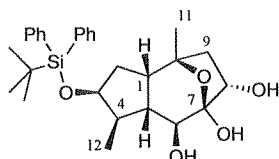

The hydroxy ketone **12** (39.2 mg, 61.2  $\mu\text{mol}$ ) was stirred in MeOH (300  $\mu\text{L}$ ) with 4 Å molecular sieves (50 mg) for 5 minutes. Amberlyst 15 (15 mg) was added and the resulting mixture was stirred at room temperature for 16 hours, quenched with sodium bicarbonate (3 mL) and filtered. The solid was washed with H<sub>2</sub>O (15 mL) and Et<sub>2</sub>O (20 mL) and the separated aqueous phase was back-extracted with Et<sub>2</sub>O (2  $\times$  20 mL). Combined organic phases were washed with brine (50 mL), dried (MgSO<sub>4</sub>) and concentrated *in vacuo* to afford the title compound, 30.9 mg. (This compound was also formed during the formation of **39** if the reaction was left for more than 4 hours.)  $\delta_{\text{H}}$  (600 MHz; CDCl<sub>3</sub>) 7.67 (4H, m, *o*-Ph), 7.44 (2H, m, *p*-Ph), 7.38 (4H, m, *m*-Ph), 4.81 (1H, br s, OH), 4.33 (1H, dd, *J* 12.0, 4.9, H-8), 4.23 (1H, m, H-3), 3.85 (1H, d, *J* 4.6, H-6), 2.54 (1H, br s, OH), 2.44-2.39 (2H, m, OH and H-1), 2.36 (1H, dd, *J* 12.9, 10.4, H-5), 2.14 (1H, m, H-4), 1.88 (1H, dd, *J* 14.4, 12.0, H-9), 1.72 (1H, dd, *J* 14.7, 7.0, H-2), 1.62 (1H, dd, *J* 14.4, 4.9, H-9'), 1.11 (3H, s, H-11), 1.09 (9H, s, C(CH<sub>3</sub>)<sub>3</sub>), 1.08 (1H, m, H-2'), 1.07 (3H, d, *J* 7.1, H-12);  $\delta_{\text{C}}$  (150 MHz; CDCl<sub>3</sub>) 135.9 (*o*-Ph), 135.8 (*o*-Ph), 134.9 (*ipso*-Ph), 133.9 (*ipso*-Ph), 129.58 (*p*-Ph), 129.53 (*p*-Ph), 127.5 (*m*-Ph), 127.4 (*m*-Ph), 103.3 (C-7), 82.1 (C-10), 77.3 (C-3), 74.6 (C-8), 68.2 (C-6), 50.5 (C-5), 42.6 (C-1), 42.4 (C-4), 37.1 (C-9), 36.3 (C-2), 27.1 (C-11), 27.0 (C(CH<sub>3</sub>)<sub>3</sub>), 19.5 (C(CH<sub>3</sub>)<sub>3</sub>), 13.0 (C-12);  $\nu_{\text{max}}$  (film; cm<sup>-1</sup>) 3411 (br OH), 2960 (C-H), 2930 (C-H), 2857 (C-H), 1589 (w Ar);  $[\alpha]_{\text{D}} +44.9$  (*c.* 0.63, CHCl<sub>3</sub>); found (ESI+) [MNa]<sup>+</sup> 505.2389; C<sub>28</sub>H<sub>38</sub>O<sub>5</sub>SiNa requires *M*, 505.2386.

Standard 1H DFX-600  
Ss4043

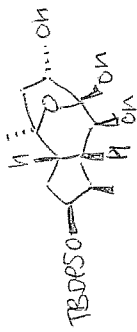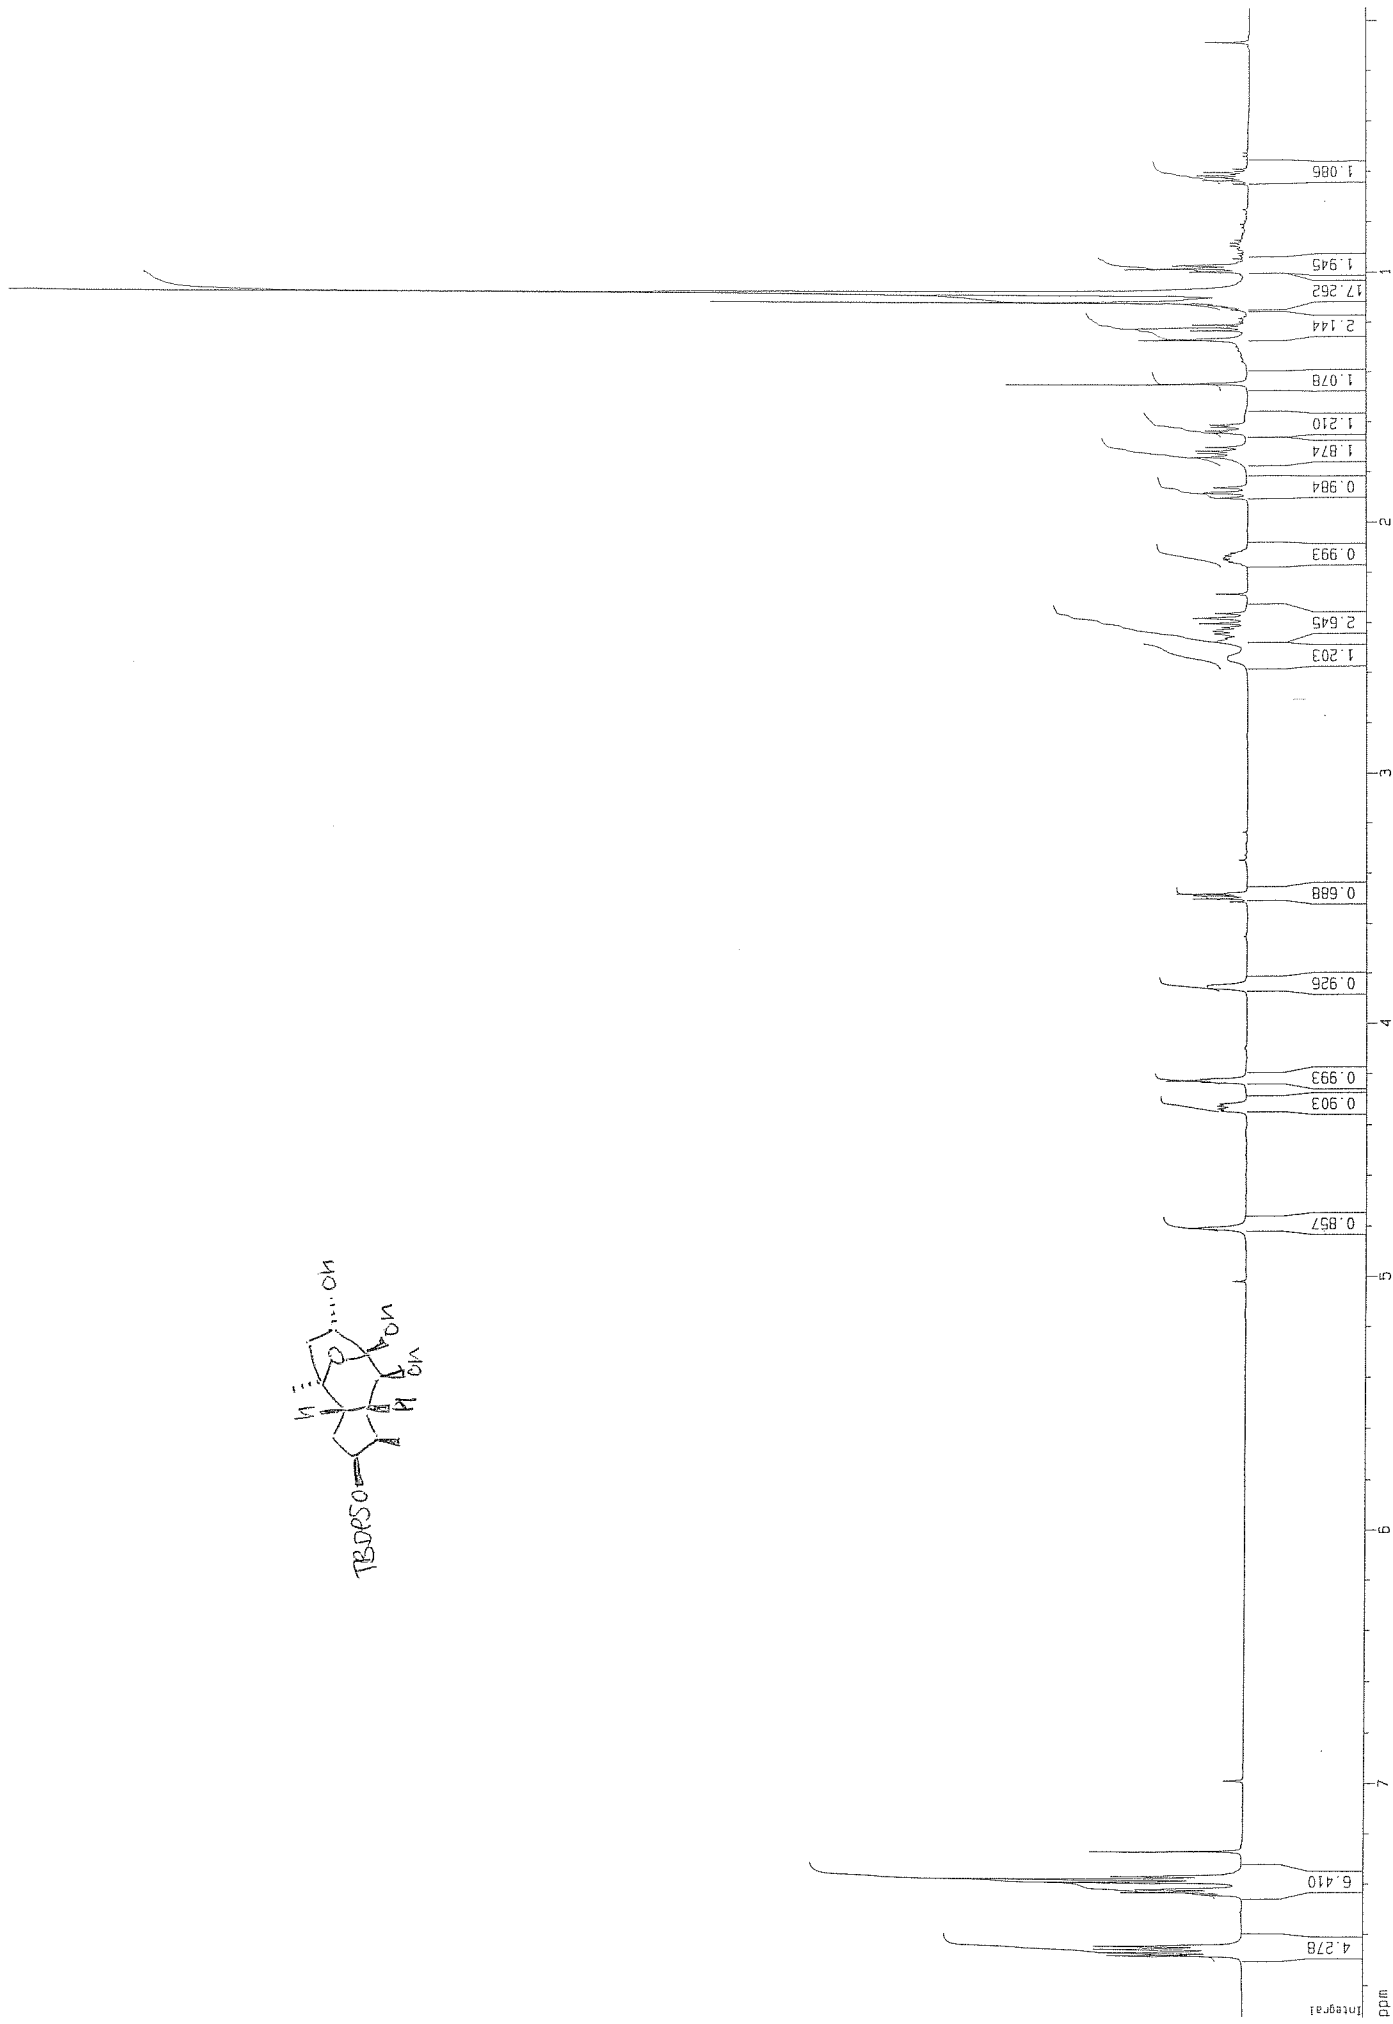





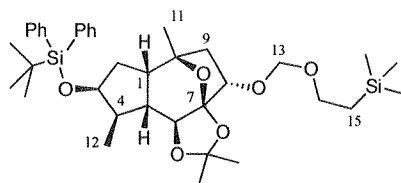

Amberlyst 15 (10 mg) was added to a stirring suspension of the MOM ether **13** (45.3 mg, 58.7  $\mu$ mol) and 4 Å molecular sieves (100 mg) in acetone (1.0 mL). The mixture was stirred at room temperature for 50 minutes then quenched with sodium bicarbonate solution (5 mL) and filtered. The solid was washed with H<sub>2</sub>O (10 mL) and Et<sub>2</sub>O (20 mL). The separated aqueous phase was extracted with Et<sub>2</sub>O (2 × 20 mL) and the combined organic phases were washed with brine, dried (MgSO<sub>4</sub>) and concentrated *in vacuo*. Column chromatography (SiO<sub>2</sub>, Et<sub>2</sub>O/petrol ether, 1:19) afforded the acetal as a colourless oil, 28 mg, 78%;  $\delta_{\text{H}}$  (600 MHz; CDCl<sub>3</sub>) 7.67 (4H, m, *o*-Ph), 7.43 (2H, *p*-Ph), 7.38 (4H, m, *m*-Ph), 4.72 (1H, d, *J* 6.7, H-13), 4.65 (1H, d, *J* 6.7, H-13'), 4.17 (2H, m, H-3 and H-8), 4.09 (1H, s, H-6), 3.57 (2H, t, *J* 8.5, H-14), 2.61 (1H, m, H-1), 2.43 (1H, dd, *J* 12.0, 11.8, H-5), 1.81 (1H, dd, *J* 13.5, 10.7, H-9), 1.66 (2H, m, H-2 and H-4), 1.47 (3H, s, C(CH<sub>3</sub>)(CH<sub>3</sub>)), 1.35 (3H, s, (CH<sub>3</sub>)(CH<sub>3</sub>)) 1.34 (1H, m, H-9'), 1.14 (3H, s, H-11), 1.13 (3H, d, *J* 6.6, H-12), 1.08 (10H, m, H-2' and C(CH<sub>3</sub>)<sub>3</sub>), 0.89 (2H, m, H-15), 0.02 (9H, s, Si(CH<sub>3</sub>)<sub>3</sub>);  $\delta_{\text{C}}$  (150 MHz; CDCl<sub>3</sub>) 136.0 (*o*-Ph), 135.8 (*o*-Ph), 134.8 (*ipso*-Ph), 133.9 (*ipso*-Ph), 129.55 (*p*-Ph), 129.52 (*p*-Ph), 127.5 (*m*-Ph), 127.4 (*m*-Ph), 109.2 (C(CH<sub>3</sub>)<sub>2</sub>), 107.1 (C-7), 94.2 (C-13), 78.9 (C-10), 76.7 (C-3), 76.2 (C-6), 73.8 (C-8), 65.2 (C-14), 45.4 (C-4), 45.1 (C-5), 43.8 (C-1), 35.8 (C-2), 35.3 (C-9), 27.8 and 27.7 (C-11 and C(CH<sub>3</sub>)(CH<sub>3</sub>)), 27.0 (C(CH<sub>3</sub>)<sub>3</sub>), 25.8 (C(CH<sub>3</sub>)(CH<sub>3</sub>)), 19.4 (C(CH<sub>3</sub>)<sub>3</sub>), 18.0 (C-15), 13.2 (C-12), -1.4 (Si(CH<sub>3</sub>)<sub>3</sub>);  $\nu_{\text{max}}$  (film; cm<sup>-1</sup>) 2955 (C-H), 2928 (C-H), 2856 (C-H), 1590 (w Ar), 835 (Si(CH<sub>3</sub>)<sub>3</sub>);  $[\alpha]_{\text{D}}^{25} +29.2$  (*c.* 0.73, CHCl<sub>3</sub>); found (ESI+) [MNa]<sup>+</sup> 675.3469; C<sub>37</sub>H<sub>56</sub>O<sub>6</sub>Si<sub>2</sub>Na requires 675.3513.



Standard 13C DRX-500  
ss4033

ppm

- 136.02
- 135.86
- 129.95
- 129.52
- 127.53
- 127.44
- 125.51
- 109.27
- 107.15
- 94.27
- 78.94
- 77.26
- 77.21
- 77.00
- 76.79
- 76.29
- 73.86
- 55.25
- 45.48
- 45.08
- 43.82
- 35.86
- 35.32
- 34.22
- 30.31
- 29.59
- 27.81
- 27.70
- 27.04
- 25.83
- 19.47
- 18.03
- 13.24
- 1.47

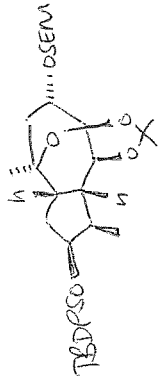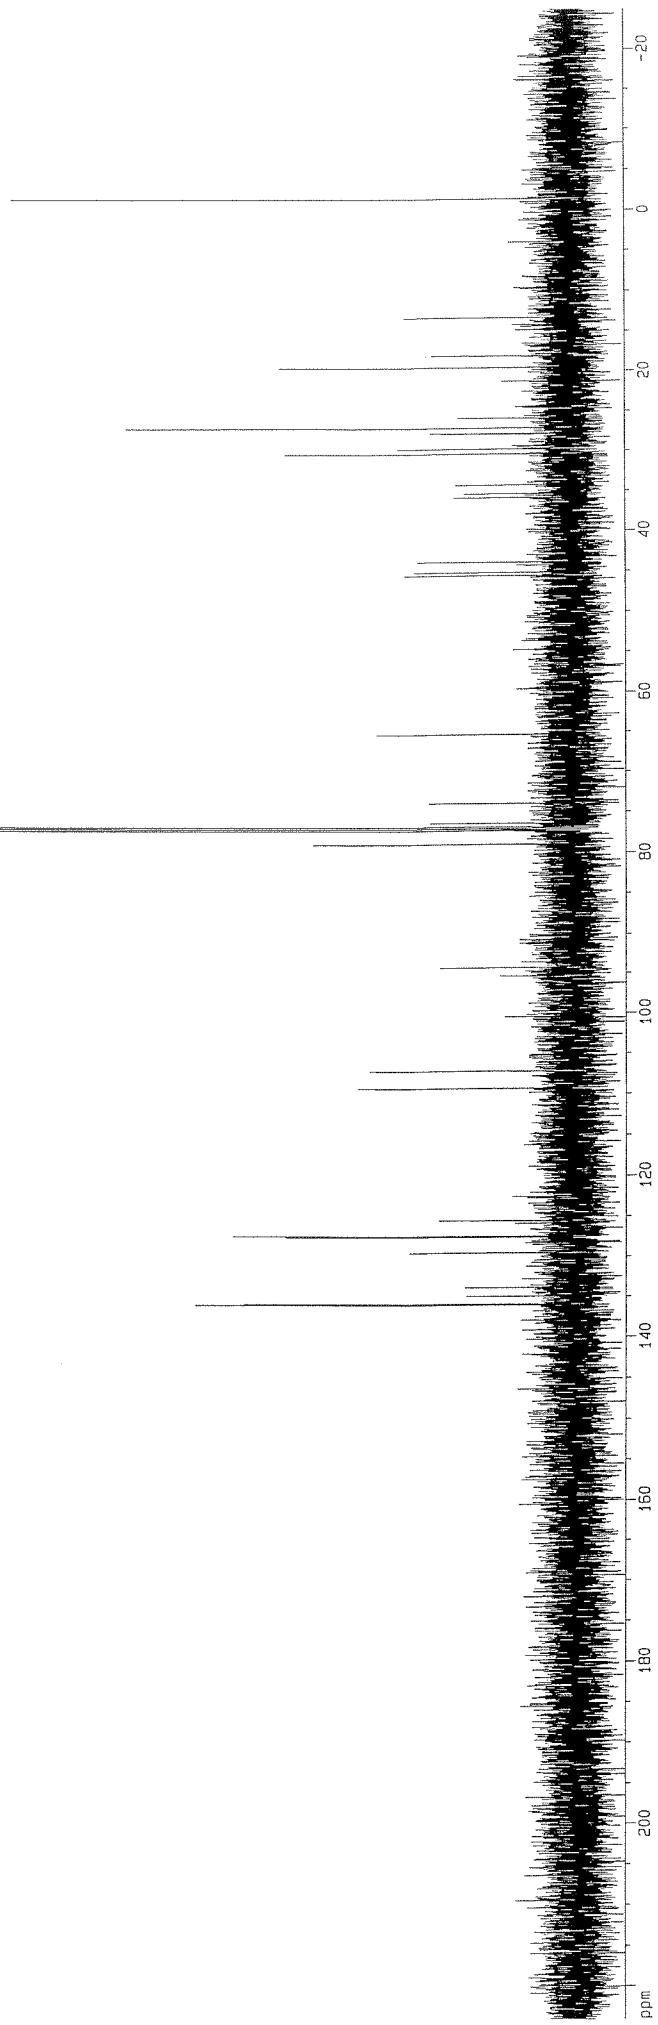

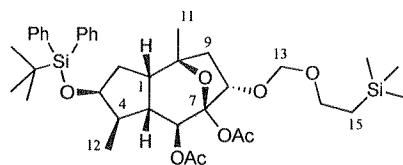

Acetyl chloride (42.2  $\mu\text{L}$ , 594  $\mu\text{mol}$ ) was added to a stirring solution of lactol **39** (36.4 mg, 59.4  $\mu\text{mol}$ ) and  $\text{Et}_3\text{N}$  (164.9  $\mu\text{L}$ , 1.19 mmol) in  $\text{CH}_2\text{Cl}_2$  (200  $\mu\text{L}$ ). The resulting mixture was stirred at room temperature for 1 hour then quenched with saturated ammonium chloride solution (15 mL), diluted with  $\text{H}_2\text{O}$  (5 mL) and extracted with  $\text{Et}_2\text{O}$  ( $3 \times 20$  mL). The combined organic phases were washed with brine (50 mL), dried ( $\text{MgSO}_4$ ) and evaporated under reduced pressure. Column chromatography ( $\text{SiO}_2$ ,  $\text{Et}_2\text{O}$ /petrol ether, 1:4) afforded the *bis*-acetate as a colourless oil, 21 mg, 51%;  $\delta_{\text{H}}$  (600 MHz;  $\text{CDCl}_3$ ) 7.67 (4H, m, *o*-Ph), 7.44 (2H, m, *p*-Ph), 7.38 (4H, m, *m*-Ph), 5.58 (1H, s, H-6), 4.79 (1H, m, H-8), 4.63 (2H, m, H-13), 4.21 (1H, br s, H-3), 3.57 (2H, m, H-14), 2.58 (1H, m, H-1), 2.22 (2H, m, H-4 and H-5), 2.16 (3H, s,  $\text{CH}_3\text{C}=\text{O}$ ), 2.13 (3H, s,  $\text{CH}_3'\text{C}=\text{O}$ ), 2.12 (1H, m, H-9), 1.76 (2H, m, H-2 and H-9'), 1.17 (3H, s, H-11), 1.13 (3H, d,  $J$  7.0, H-12), 1.09 (10H, s,  $\text{C}(\text{CH}_3)_3$  and H-2' underneath), 0.87 (2H, m, H-15), 0.02 (9H, s,  $\text{Si}(\text{CH}_3)_3$ );  $\delta_{\text{C}}$  (150 MHz;  $\text{CDCl}_3$ ) 169.7 (C=O), 167.7 (C'=O), 135.9 (*o*-Ph), 135.7 (*o*-Ph), 135.0 (*ipso*-Ph), 133.9 (*ipso*-Ph), 129.59 (*p*-Ph), 129.53 (*p*-Ph), 127.5 (*m*-Ph), 127.4 (*m*-Ph), 107.6 (C-7), 95.3 (C-13), 83.2 (C-10), 78.3 (C-8), 77.3 (C-3), 67.9 (C-6), 65.6 (C-14), 48.3 (C-5), 42.4 (C-1), 42.3 (C-4), 36.7 (C-9), 36.2 (C-2), 27.0 ( $\text{C}(\text{CH}_3)_3$ ), 26.8 (C-11), 21.9 ( $\text{C}\text{H}_3\text{C}=\text{O}$ ), 21.3 ( $\text{C}'\text{H}_3\text{C}=\text{O}$ ), 19.5 ( $\text{C}(\text{CH}_3)_3$ ), 18.0 (C-15), 12.9 (C-12), -1.5 ( $\text{Si}(\text{CH}_3)_3$ );  $\nu_{\text{max}}$  (film;  $\text{cm}^{-1}$ ) 2954 (C-H), 1746 (C=O), 836 ( $\text{Si}(\text{CH}_3)_3$ );  $[\alpha]_{\text{D}}$  +31.2 (c. 1.05,  $\text{CHCl}_3$ ); found (ESI+)  $[\text{MNa}]^+$  719.3416;  $\text{C}_{38}\text{H}_{56}\text{O}_8\text{Si}_2\text{Na}$  requires 719.3411.

5a4061, Standard 1H UHX-600

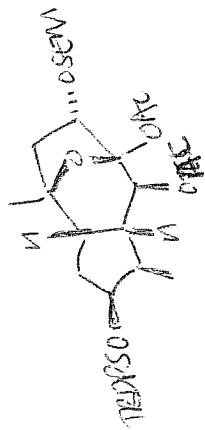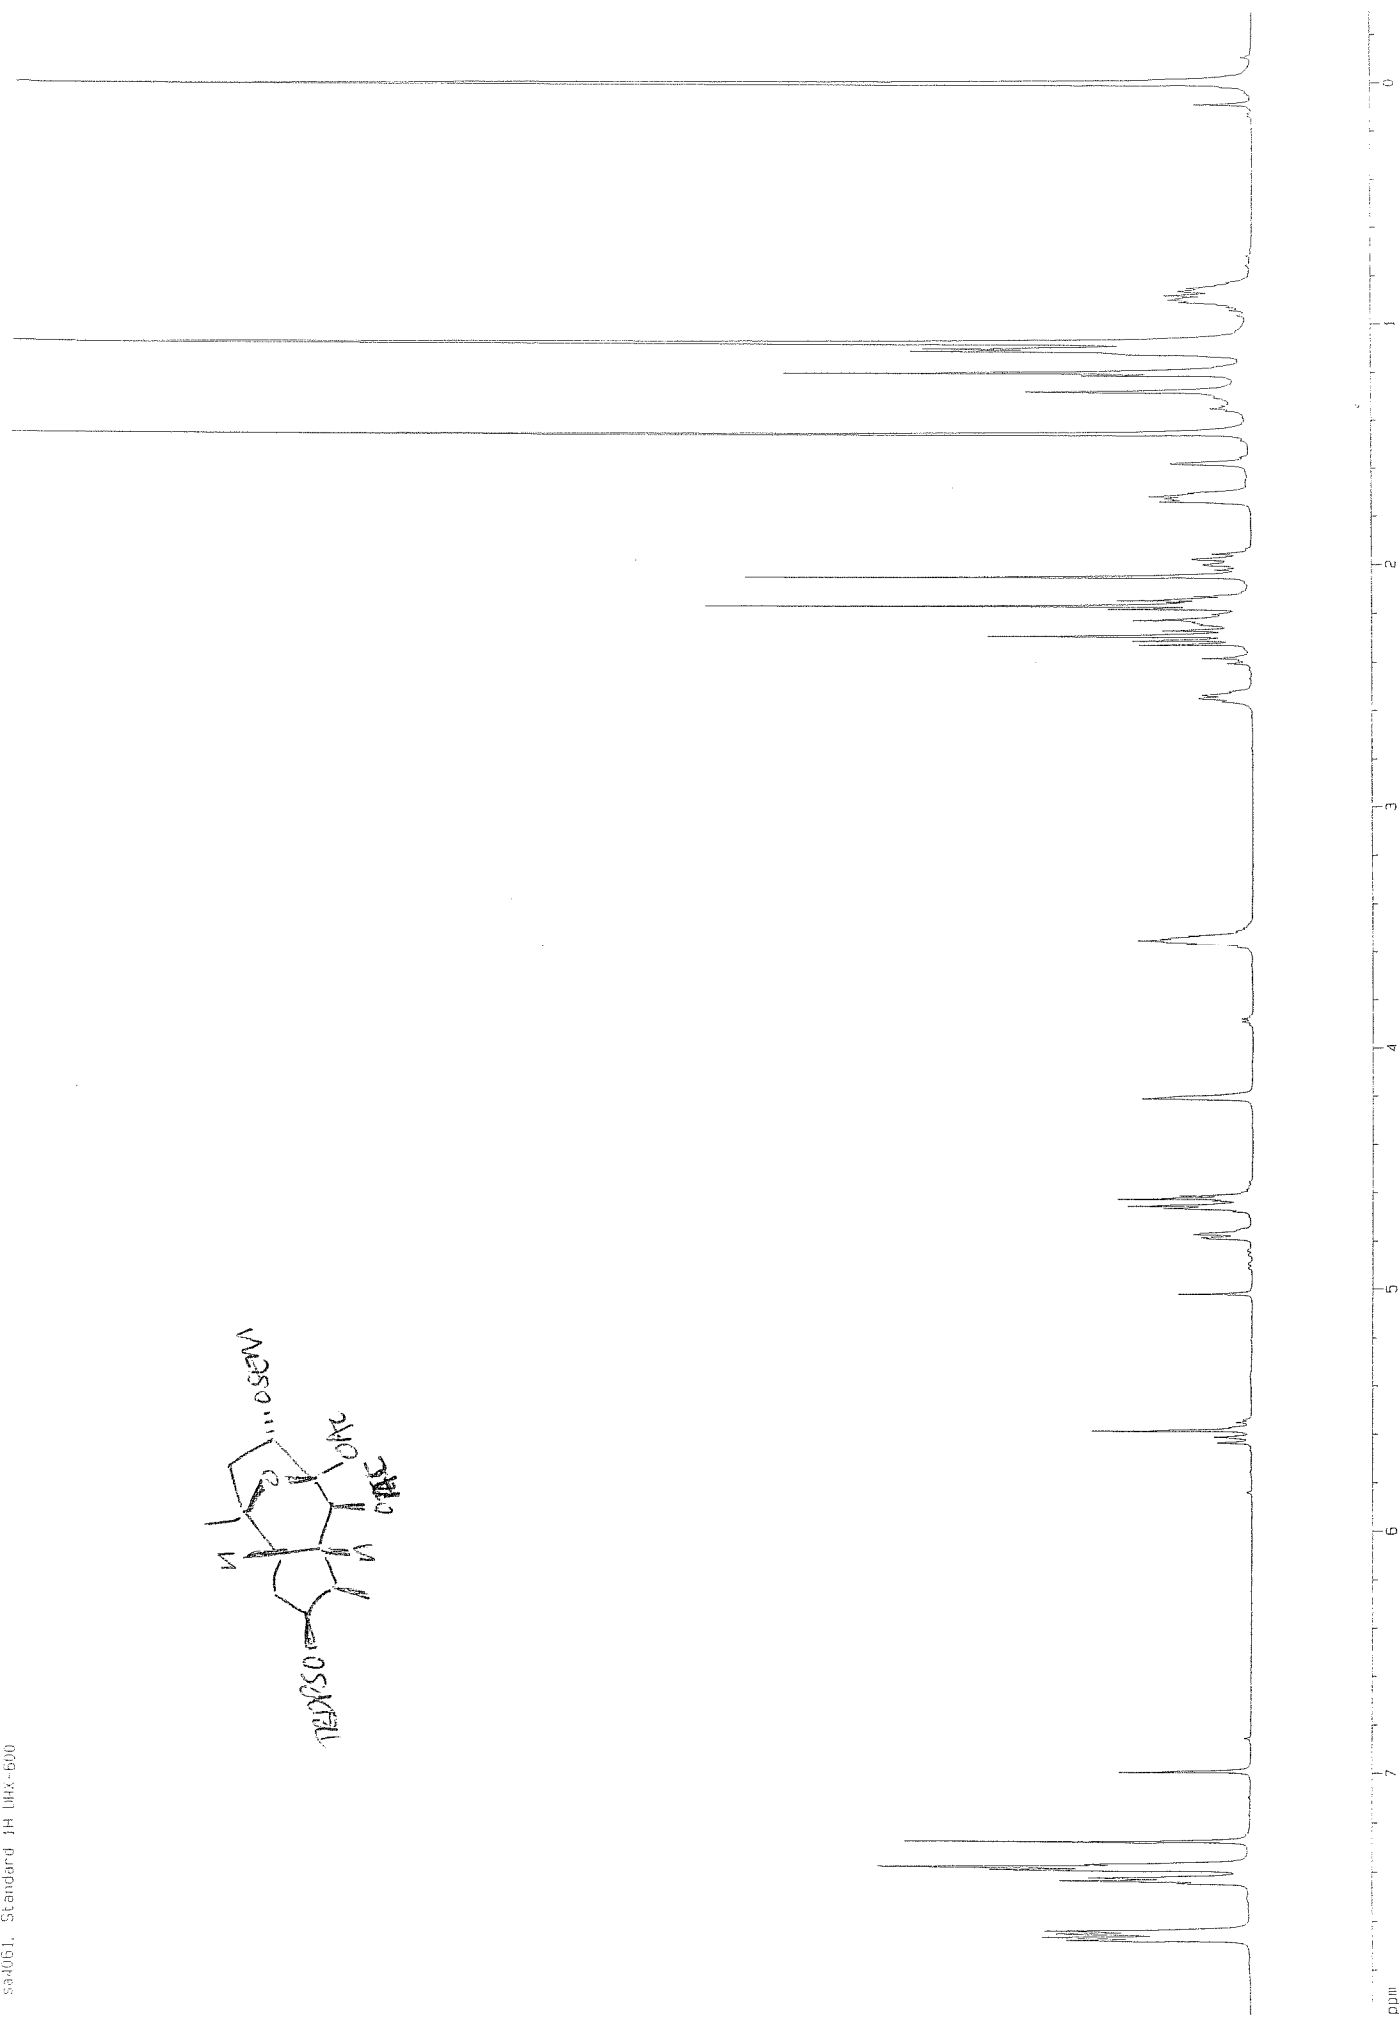

ppm

CPY40051, Standard 13C MUX-000

- 167.76
- 159.73
- 135.96
- 135.78
- 135.04
- 133.90
- 129.99
- 129.53
- 127.56
- 127.47
- 125.51
- 107.59
- 95.30
- 83.20
- 78.28
- 77.26
- 77.21
- 77.00
- 76.79
- 67.97
- 65.67
- 48.33
- 42.40
- 42.21
- 36.78
- 36.21
- 29.22
- 30.32
- 29.09
- 27.03
- 26.78
- 21.92
- 21.91
- 19.56
- 18.93
- 12.83
- 1.29

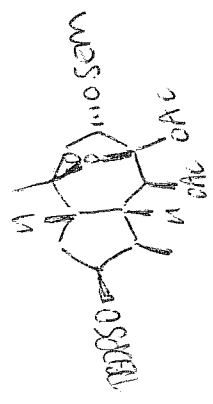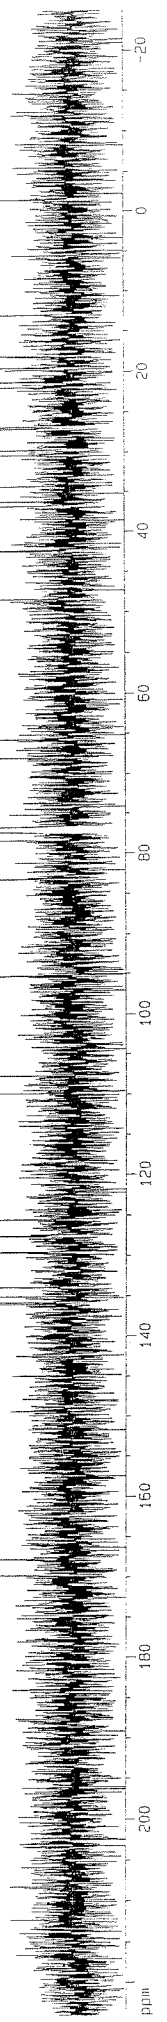



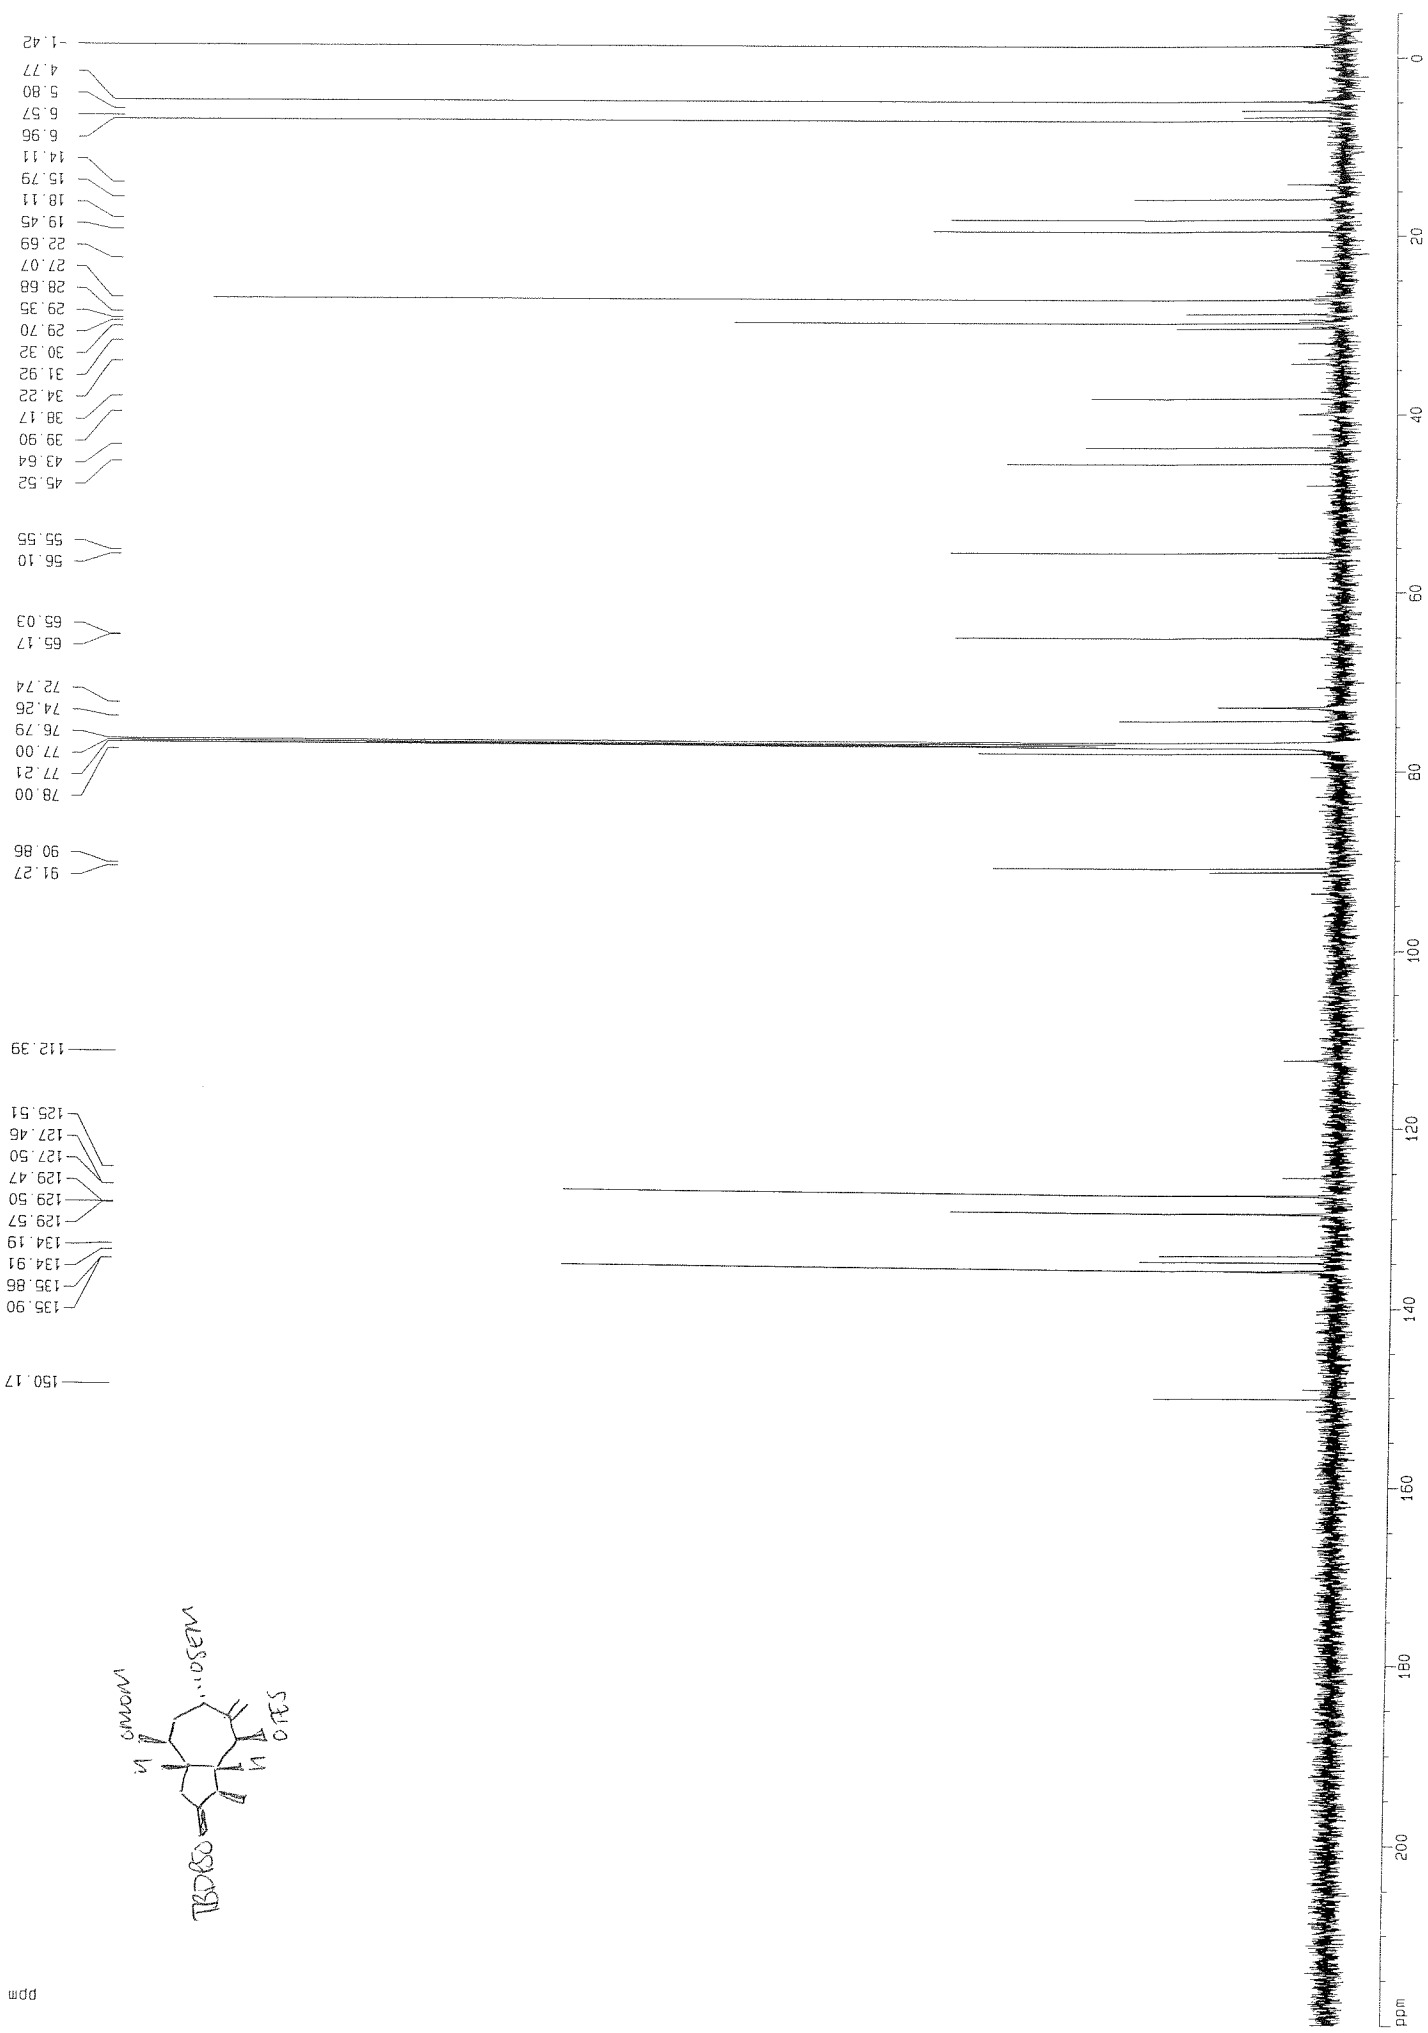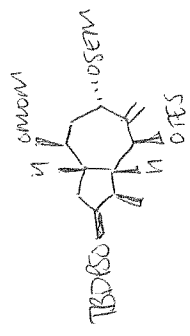



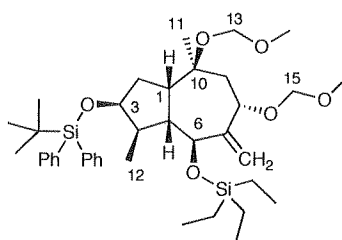

KHMDS (131  $\mu\text{L}$ , 65.4  $\mu\text{mol}$ , 0.5 M in PhMe) was added drop-wise to a stirring suspension of methyltriphenylphosphonium bromide (24.3 mg, 68.1  $\mu\text{mol}$ ) in THF (200  $\mu\text{L}$ ). The resulting yellow mixture was stirred at rt for 1 hour then cooled to  $-78\text{ }^\circ\text{C}$ . The ketone **13** (30 mg, 38.9  $\mu\text{mol}$ ) was added drop-wise as a solution of THF (200  $\mu\text{L}$ ) and the mixture warmed to room temperature with stirring for 1 hour. The reaction was quenched with saturated ammonium chloride solution (20 mL) and extracted with Et<sub>2</sub>O (3  $\times$  20 mL). The combined organic phases were washed with brine (20 mL), dried (MgSO<sub>4</sub>) and evaporated under reduced pressure. Column chromatography (SiO<sub>2</sub>, Et<sub>2</sub>O/petrol ether, 1:19) afforded the title compound as a colourless oil, 9.8 mg, 33%;  $\delta_{\text{H}}$  (600 MHz; CDCl<sub>3</sub>) 7.67 (4H, m, *o*-Ph), 7.42 (2H, m, *p*-Ph), 7.37 (4H, m, *m*-Ph), 5.14 (1H, s, =CH), 5.02 (1H, s, =CH'), 4.71 (1H, d, *J* 7.2, H-13), 4.67 (1H, d, *J* 7.2, H-13'), 4.66 (1H, d, *J* 6.6, H-15), 4.44 (1H, d, *J* 6.6, H-15'), 4.43 (1H, m, H-8), 4.22 (1H, m, H-3), 3.95 (1H, d, *J* 7.7, H-6), 3.36 (3H, s, H-14), 3.35 (3H, s, H-16), 2.82 (1H, ddd, *J* 12.3, 7.7, 7.6, H-1), 2.07 (1H, m, H-4), 2.02 (1H, dd, *J* 14.2, 6.2, H-9), 1.85 (1H, m, H-5), 1.63 (1H, dd, *J* 14.2, 10.2, H-9'), 1.44 (1H, m, H-2), 1.34 (1H, m, H-2'), 1.27 (3H, s, H-11), 1.13 (3H, d, *J* 7.1, H-12), 1.08 (9H, s, SiC(CH<sub>3</sub>)<sub>3</sub>), 0.91 (9H, t, *J* 7.9, Si(CH<sub>2</sub>CH<sub>3</sub>)<sub>3</sub>), 0.50 (6H, q, *J* 7.9, Si(CH<sub>2</sub>CH<sub>3</sub>)<sub>3</sub>);  $\delta_{\text{C}}$  (150 MHz; CDCl<sub>3</sub>) 150.1 (C-7), 135.88 (*o*-Ph), 135.84 (*o*-Ph), 134.9 (*ipso*-Ph), 134.1 (*ipso*-Ph), 129.49 (*p*-Ph), 129.46 (*p*-Ph), 127.48 (*m*-Ph), 127.44 (*m*-Ph), 108.1 (=CH<sub>2</sub>), 92.9 (C-15), 90.8 (C-13), 74.2 (C-3), 72.8 and 72.7 (C-6 and C-8), 55.6 (C-14 and C-5), 55.2 (C-16), 45.4 (C-1), 43.6 (C-4), 39.8 (C-9), 38.1 (C-2), 29.6 (C-11), 27.0 (C(CH<sub>3</sub>)<sub>3</sub>), 19.4 (C(CH<sub>3</sub>)<sub>3</sub>), 15.7 (C-12), 6.6 (Si(CH<sub>2</sub>CH<sub>3</sub>)<sub>3</sub>), 4.7 (Si(CH<sub>2</sub>CH<sub>3</sub>)<sub>3</sub>);  $\nu_{\text{max}}$  (film; cm<sup>-1</sup>) 2929 (C-H), 823 (Si(CH<sub>3</sub>)<sub>3</sub>);  $[\alpha]_{\text{D}}$   $-17.1$  (*c.* 0.48, CHCl<sub>3</sub>); found (ESI+) [MNa]<sup>+</sup> 705.4009; C<sub>39</sub>H<sub>62</sub>O<sub>6</sub>Si<sub>2</sub>Na requires *M*, 705.3983.



Standard 13C DRX-600  
S44084

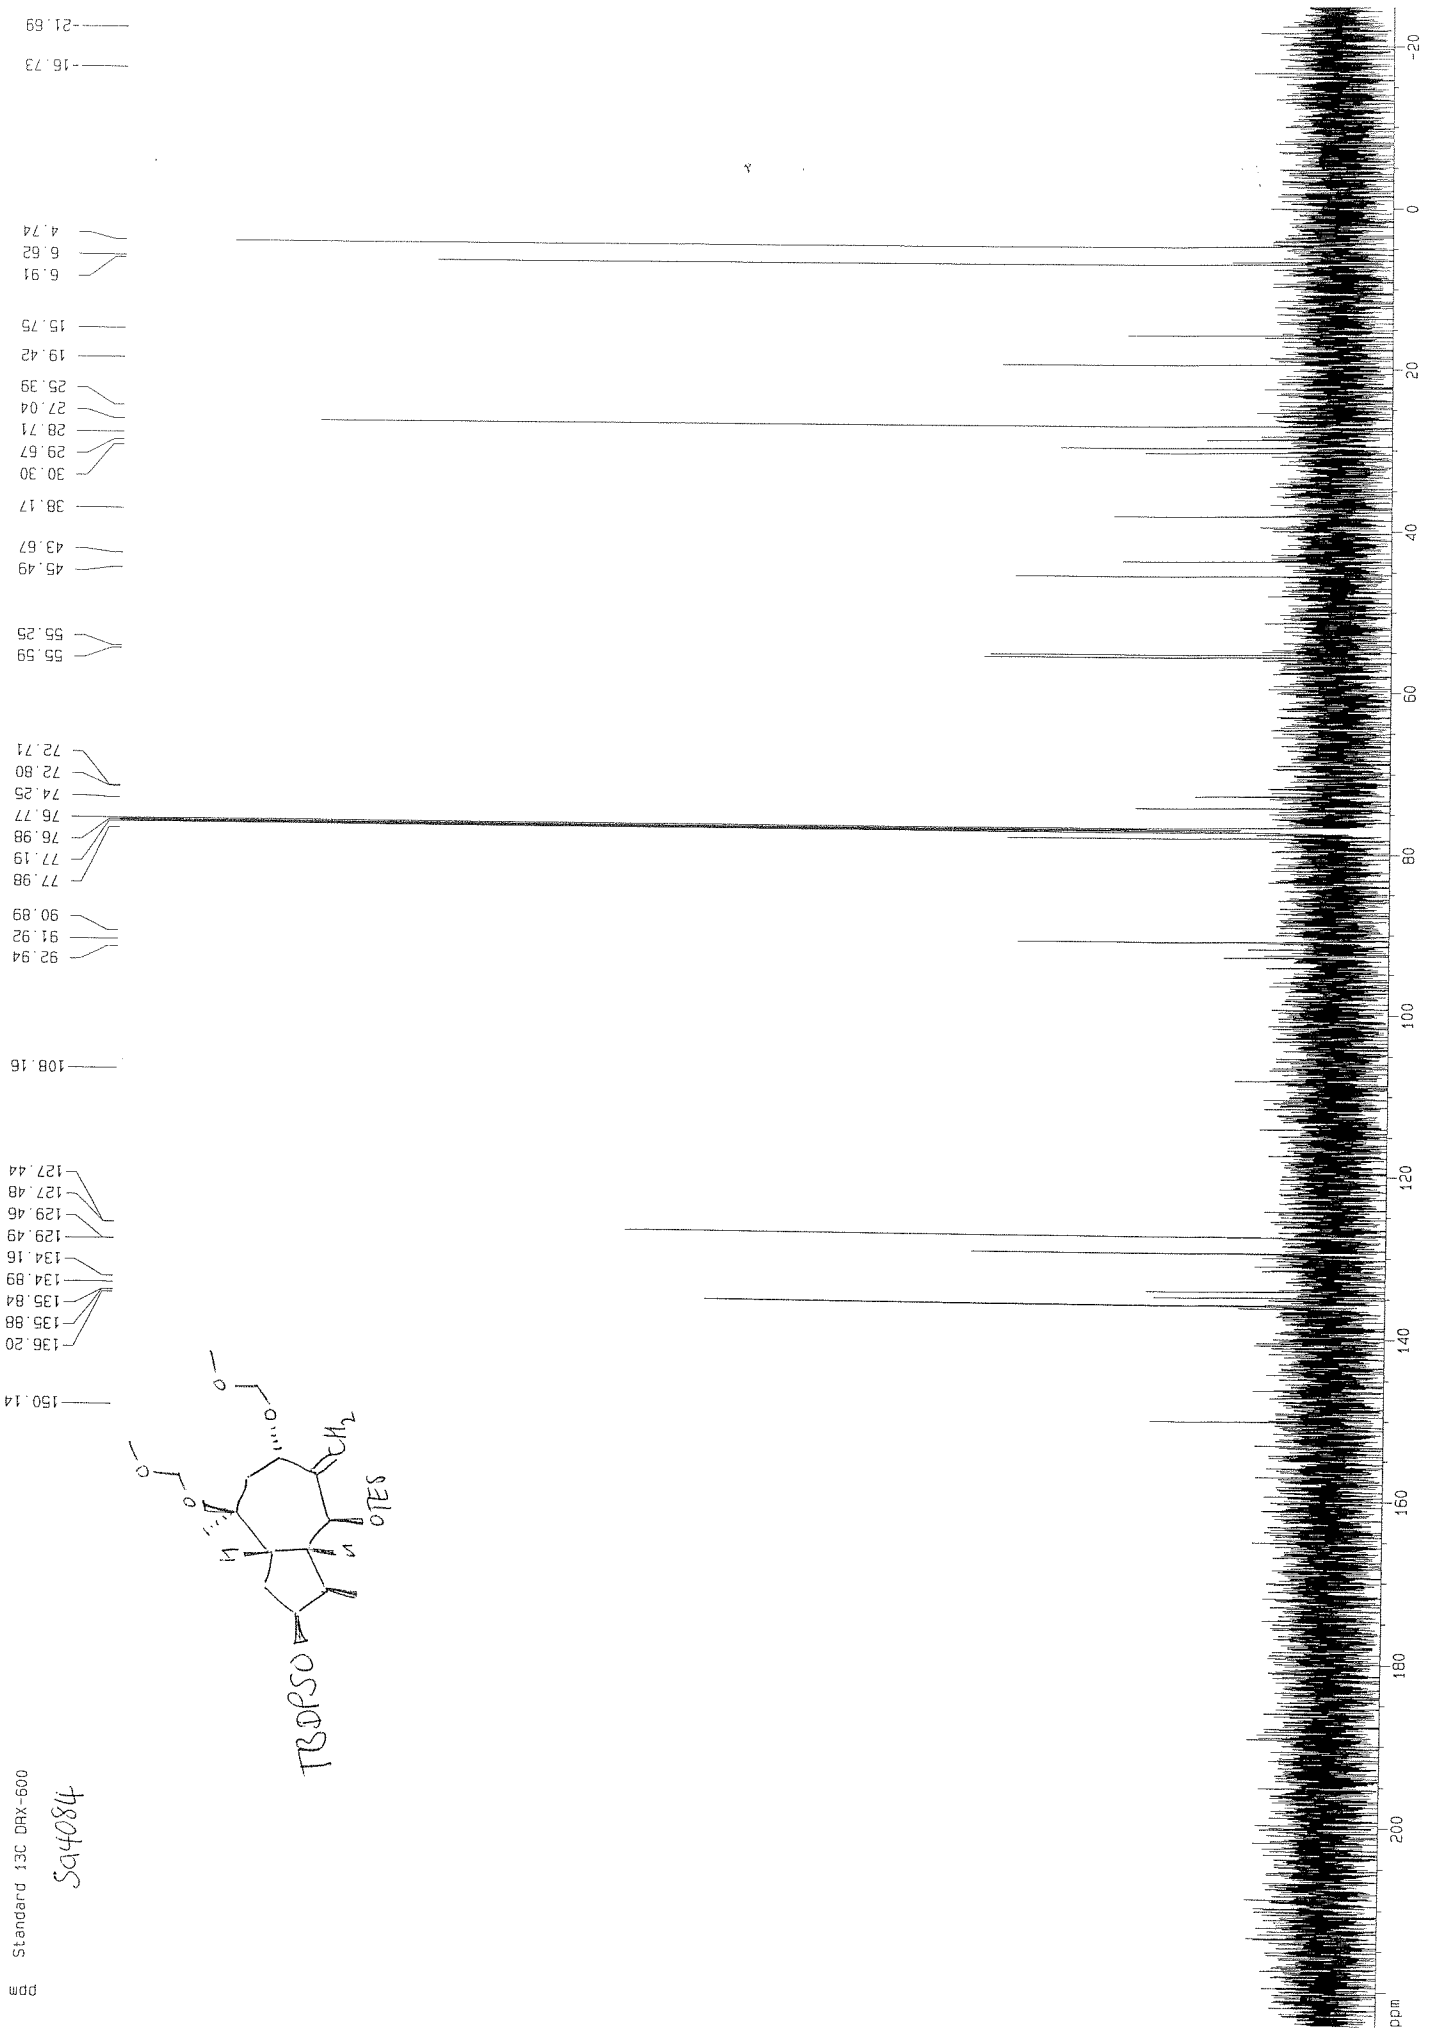



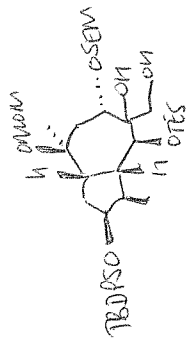

- 135.91
- 135.83
- 135.78
- 135.03
- 134.12
- 129.52
- 127.52
- 127.46
- 125.51

- 95.99
- 90.60
- 79.56
- 79.67
- 77.43
- 77.21
- 77.00
- 76.79
- 74.99
- 72.53
- 65.84
- 65.37
- 64.08
- 55.69
- 48.59
- 46.67
- 42.00
- 38.26
- 38.02
- 34.22
- 30.32
- 29.69
- 27.08
- 26.95
- 21.17
- 19.49
- 18.09
- 15.40
- 15.26
- 6.71
- 4.31
- 1.01
- 1.47

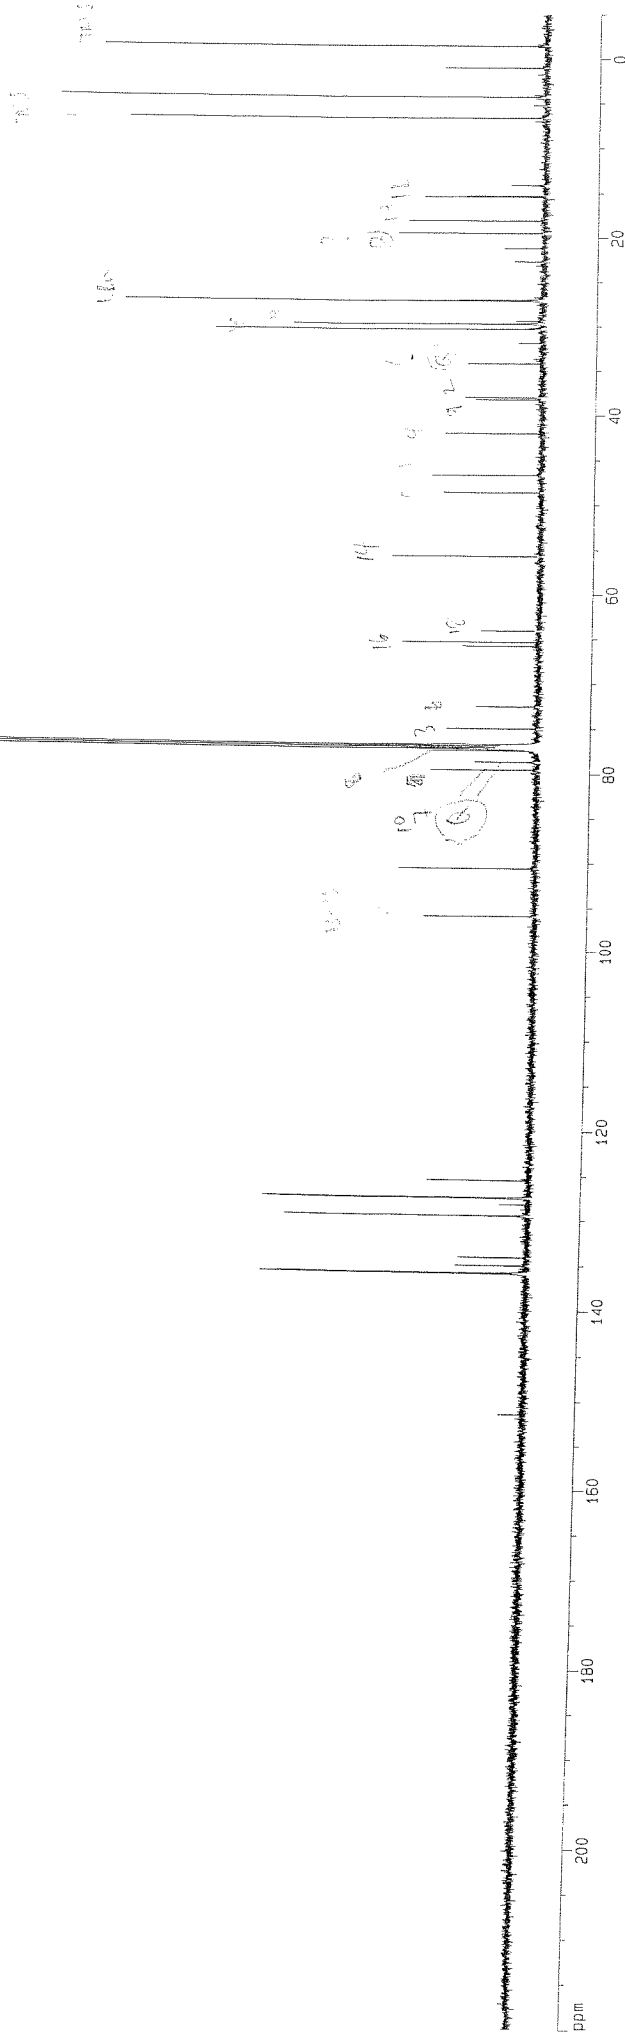

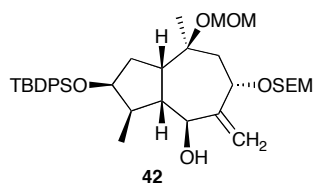

**Alcohol 42:** 4 Å molecular sieves (400 mg) were added to a solution of triethylsilyl ether **40** (108 mg, 141 μmol) in methanol (4.0 mL) and the resulting mixture stirred at room temperature for 5 minutes. The mixture was then treated with Amberlyst-15 resin (80 mg, 640 μmol) and stirred at room temperature for a further 16 hours. The suspension was filtered through a pad of silica, concentrated *in vacuo* and combined with an identical batch from a reaction with 111 mg of silyl ether. The crude oil was purified by column chromatography (SiO<sub>2</sub>, Et<sub>2</sub>O/petrol ether 1:9 to 1:4) to afford recovered starting material (36 mg, 16%) and the alcohol 141 mg, 76%; δ<sub>H</sub> (600 MHz; CDCl<sub>3</sub>) 7.67 (4H, m, *o*-Ph), 7.44 (2H, *p*-Ph), 7.38 (4H, *m*-Ph), 5.08 (2H, m, =CH and OH), 4.90 (1H, d, *J* 7.2, O-10-CH<sub>2</sub>O), 4.85 (1H, d, *J* 7.2, O-10-CH<sub>2</sub>O), 4.80 (1H, s, =CH'), 4.67 (1H, d, *J* 6.7, O-8-CH<sub>2</sub>O), 4.63 (1H, d, *J* 6.7, O-8-CH<sub>2</sub>O), 4.58 (1H, dd, *J* 9.9, 2.5, H-8), 4.13 (2H, m, H-3 and H-6), 3.74 (1H, ddd, *J* 16.1, 6.0, 5.9, SiCH<sub>2</sub>CH<sub>2</sub>), 3.55 (1H, ddd, *J* 16.1, 6.1, 6.1, SiCH<sub>2</sub>CH<sub>2</sub>), 3.47 (3H, s, OCH<sub>3</sub>), 2.86 (1H, m, H-1), 2.36 (1H, ddd, *J* 10.4, 8.4, 2.4, H-5), 2.07 (1H, dd, *J* 13.7, 2.5, H-9), 1.66 (1H, m, H-4), 1.54 (1H, dd, *J* 13.7, 9.9, H-9'), 1.42 (1H, m, H-2), 1.27 (3H, s, H-14), 1.09 (9H, s, SiC(CH<sub>3</sub>)<sub>3</sub>), 1.08 (3H, d, *J* 7.0, H-15), 1.07 (1H, m, H-2'), 0.93 (2H, m, SiCH<sub>2</sub>CH<sub>2</sub>), 0.19 (9H, s, Si(CH<sub>3</sub>)<sub>3</sub>); δ<sub>C</sub> (150 MHz; CDCl<sub>3</sub>) 149.0 (C-7) 135.9 (*o*-Ph), 135.8 (*o*-Ph), 134.9 (*ipso*-Ph), 133.9 (*ipso*-Ph), 129.59 (*p*-Ph), 129.57 (*p*-Ph), 127.5 (*m*-Ph), 127.4 (*m*-Ph), 109.8 (=CH<sub>2</sub>), 93.6 (O-8-CH<sub>2</sub>O), 90.7 (O-10-CH<sub>2</sub>O), 80.6 (C-10), 75.9 and 75.8 (C-3 and C 6), 70.5 (C-8), 65.1 (SiCH<sub>2</sub>CH<sub>2</sub>), 56.1 (OCH<sub>3</sub>), 50.8 (C-5), 47.9 (C-1), 43.9 (C-4), 42.1 (C-9), 38.7 (C-2), 29.6 (C-14), 27.0 (C(CH<sub>3</sub>)<sub>3</sub>), 19.5 (C(CH<sub>3</sub>)<sub>3</sub>), 18.0 (SiCH<sub>2</sub>CH<sub>2</sub>), 14.0 (C-15), -1.4 (Si(CH<sub>3</sub>)<sub>3</sub>); ν<sub>max</sub> (film; cm<sup>-1</sup>) 3438 (br OH), 2928 (C-H), 2857 (C-H), 1645 (w C=C), 835 (Si(CH<sub>3</sub>)<sub>3</sub>); [α]<sub>D</sub> +20.8 (*c.* 0.355, CHCl<sub>3</sub>); found (ESI+) [MNa]<sup>+</sup> 677.3660; C<sub>37</sub>H<sub>58</sub>O<sub>6</sub>Si<sub>2</sub>Na requires *M*, 677.3670.



Standard 13C DFX-600  
584076

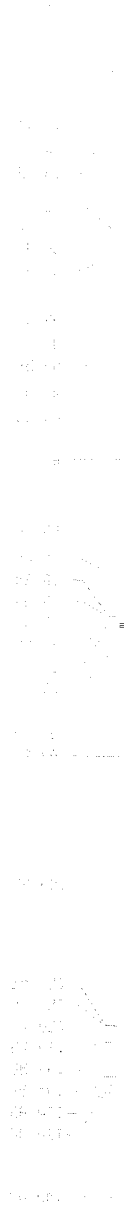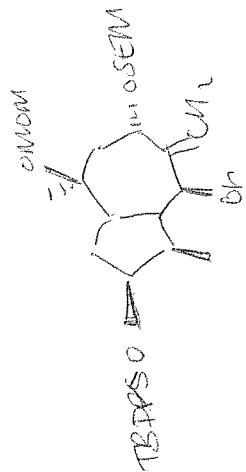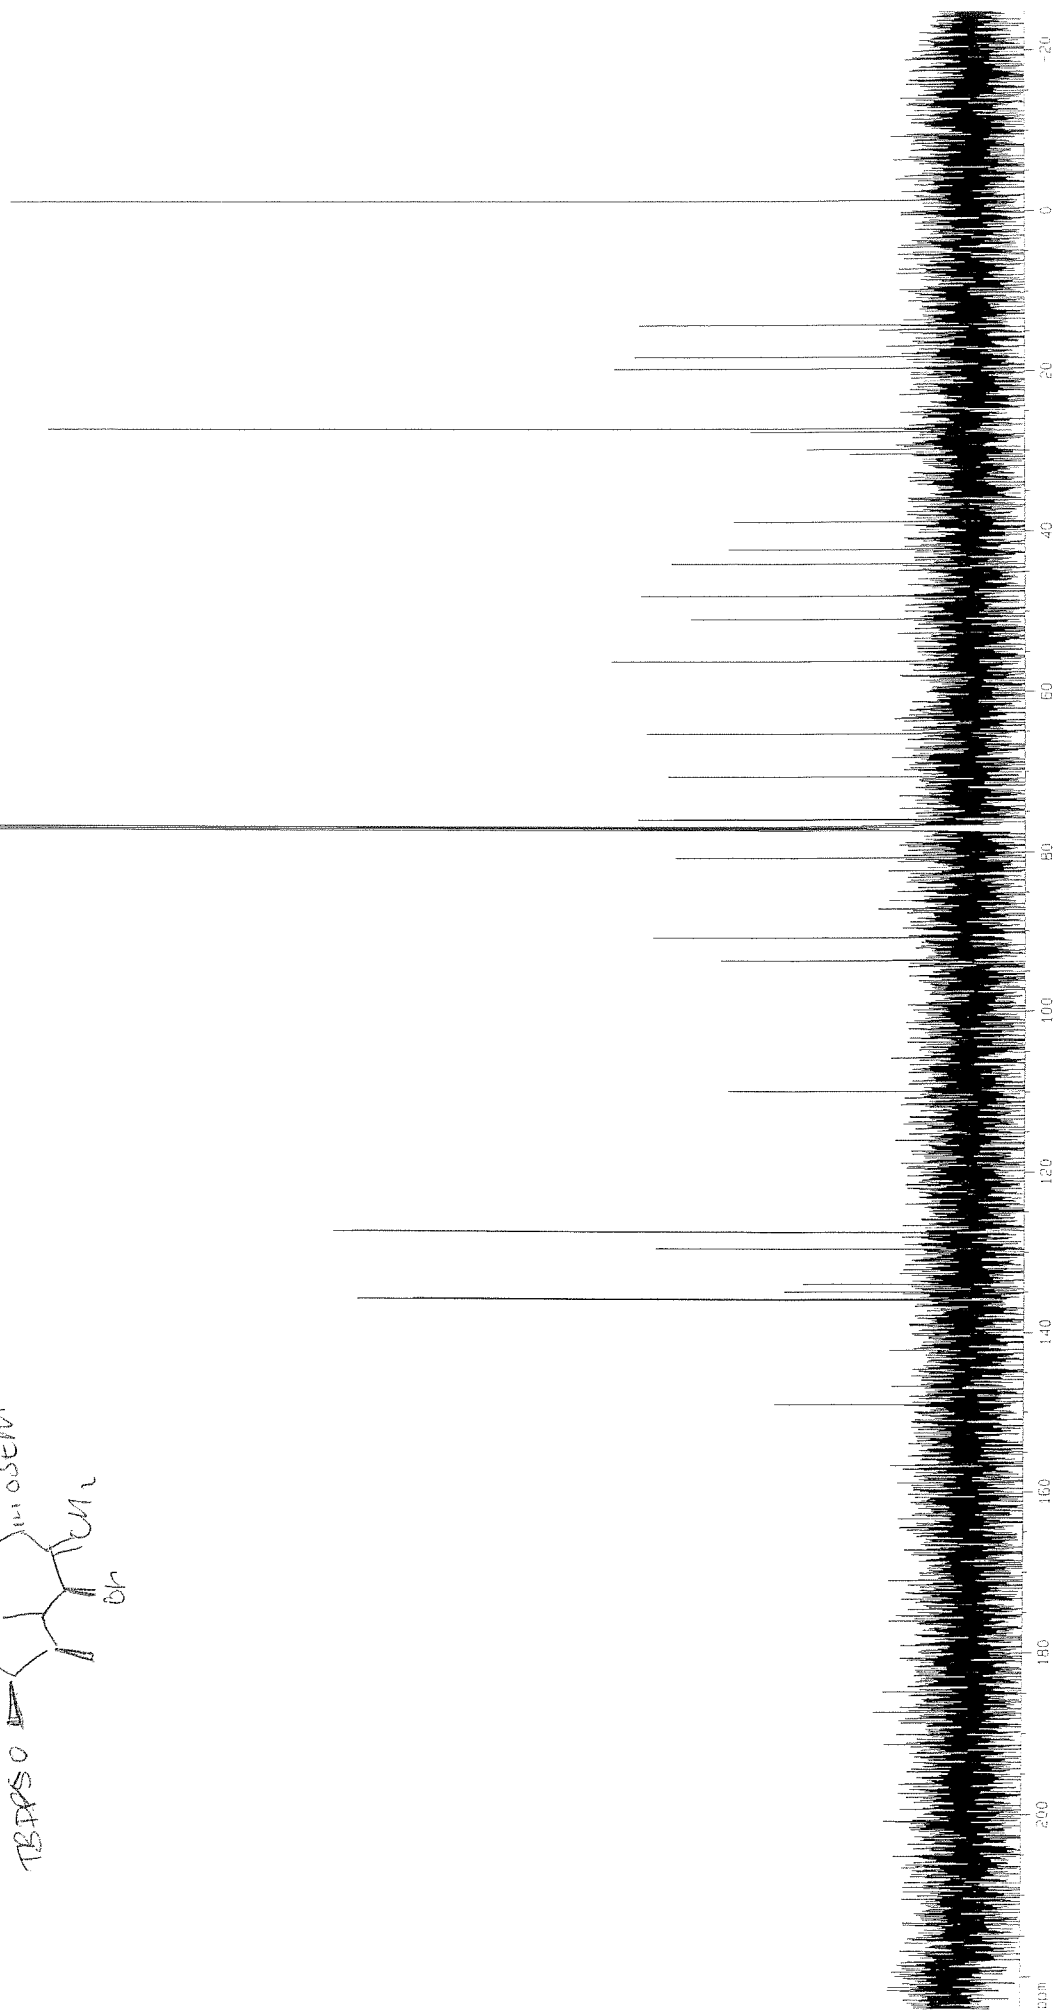



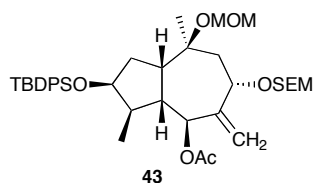

**Acetate 43:** Catalytic DMAP was added to a solution of alcohol **42** (173 mg, 265  $\mu\text{mol}$ ), acetic anhydride (249  $\mu\text{L}$ , 2.65 mmol) and pyridine (257  $\mu\text{L}$ , 3.18 mmol) in  $\text{CH}_2\text{Cl}_2$  (4.0 mL). The resulting mixture was stirred at room temperature for 18 hours then quenched with ammonium chloride solution (50 mL) and extracted with  $\text{Et}_2\text{O}$  ( $3 \times 50$  mL). The combined organic phases were washed with brine (100 mL), dried ( $\text{MgSO}_4$ ) and concentrated *in vacuo*. Column chromatography ( $\text{SiO}_2$ ,  $\text{Et}_2\text{O}$ /petrol ether, 15:85) afforded the acetate as a pale yellow oil, 167 mg, 91%;  $\delta_{\text{H}}$  (600 MHz;  $\text{CDCl}_3$ ) 7.65 (4H, m, *o*-Ph), 7.43 (2H, m, *p*-Ph), 7.37 (4H, m, *m*-Ph), 5.12 (1H, s, =CH), 5.04-5.03 (2H, m, H-6 and =CH'), 4.72 (1H, d, *J* 7.1 O-10- $\text{CH}_2\text{O}$ ), 4.66 (1H, d, *J* 7.1, O-10- $\text{CH}_2\text{O}$ ), 4.59 (1H, d, *J* 7.1, O-8- $\text{CH}_2\text{O}$ ), 4.53 (1H, d, *J* 7.1, O-8- $\text{CH}_2\text{O}$ ), 4.38 (1H, dd, *J* 9.7, 6.5, H-8), 4.20 (1H, m, H-3), 3.72 (1H, ddd, *J* 16.5, 6.6, 6.1,  $\text{SiCH}_2\text{CH}_2$ ), 3.48 (1H, m,  $\text{SiCH}_2\text{CH}_2$ ), 3.37 (3H, s,  $\text{OCH}_3$ ), 2.84 (1H, ddd, *J* 12.0, 7.7, 4.9, H-1), 2.04 (2H, m, H-5 and H-9), 2.03 (3H, s,  $\text{C}(\text{O})\text{CH}_3$ ), 1.83 (1H, m, H-4), 1.72 (1H, dd, *J* 14.4, 9.7, H-9'), 1.44 (1H, dd, *J* 13.2, 7.7, H-2), 1.39 (1H, ddd, *J* 13.2, 12.7, 4.9, H-2'), 1.13 (3H, d, *J* 6.6, H-15), 1.12 (3H, s, H-14), 1.08 (9H, s,  $\text{C}(\text{CH}_3)_3$ ), 0.90 (2H, m,  $\text{SiCH}_2\text{CH}_2$ ), 0.02 (9H, s,  $\text{Si}(\text{CH}_3)_3$ );  $\delta_{\text{C}}$  (150 MHz;  $\text{CDCl}_3$ ) 169.8 (C=O), 146.1 (C-7), 135.9 (*o*-Ph), 135.8 (*o*-Ph), 134.6 (*ipso*-Ph), 133.9 (*ipso*-Ph), 129.6 (*p*-Ph), 127.5 (*m*-Ph), 127.4 (*m*-Ph), 113.2 (=CH<sub>2</sub>), 91.0 (O-8- $\text{CH}_2\text{O}$ ), 90.7 (O-10- $\text{CH}_2\text{O}$ ), 77.9 (C-10), 74.8 (C-6), 74.2 (C-3), 71.9 (C-8), 64.9 ( $\text{SiCH}_2\text{CH}_2$ ), 55.6 ( $\text{OCH}_3$ ), 51.5 (C-5), 46.0 (C-1), 44.1 (C-4), 37.7 (C-9), 30.2 (C-2), 29.0 (C-14), 27.0 ( $\text{C}(\text{CH}_3)_3$ ), 21.3 ( $\text{C}(\text{O})\text{CH}_3$ ), 19.4 ( $\text{C}(\text{CH}_3)_3$ ), 18.0 ( $\text{SiCH}_2\text{CH}_2$ ), 15.3 (C-15), -1.4 ( $\text{Si}(\text{CH}_3)_3$ );  $\nu_{\text{max}}$  (film;  $\text{cm}^{-1}$ ) 2930 (C-H), 2848 (C-H), 1740 (C=O), 1647 (w C=C), 1588 (w Ar), 835 ( $\text{Si}(\text{CH}_3)_3$ );  $[\alpha]_{\text{D}} -23.5$  (*c.* 0.345,  $\text{CHCl}_3$ ); found (ESI+)  $[\text{MNa}]^+$  719.3799;  $\text{C}_{39}\text{H}_{60}\text{O}_7\text{Si}_2\text{Na}$  requires *M*, 719.3775.

Standard 1H DRX-600  
sa4076

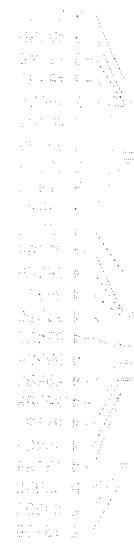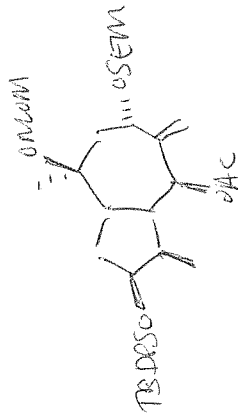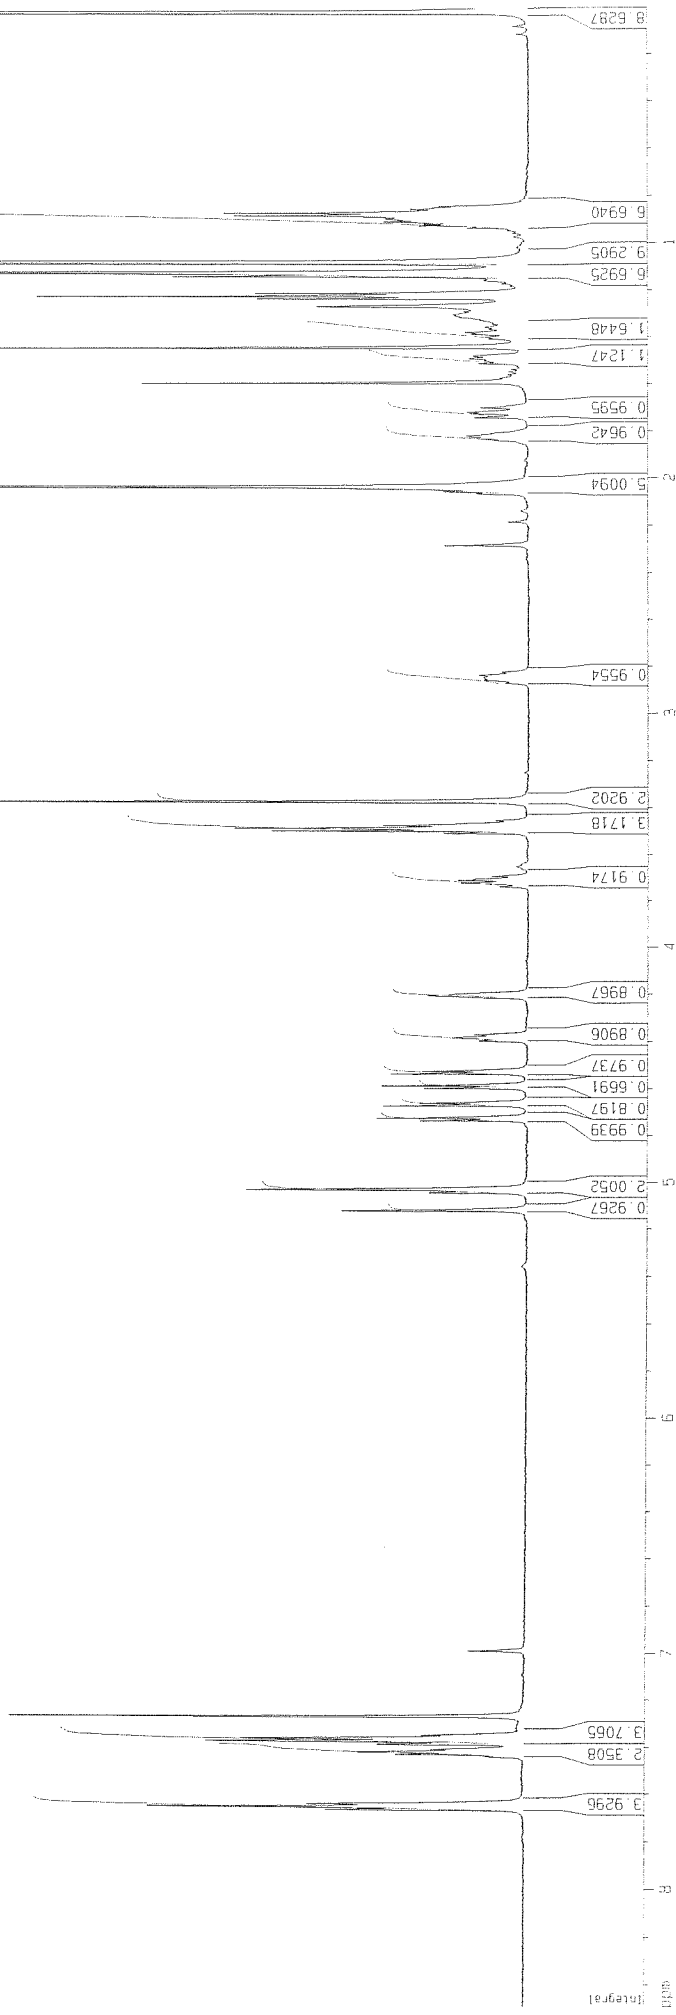

Standard 13C DRX-600  
sa4076

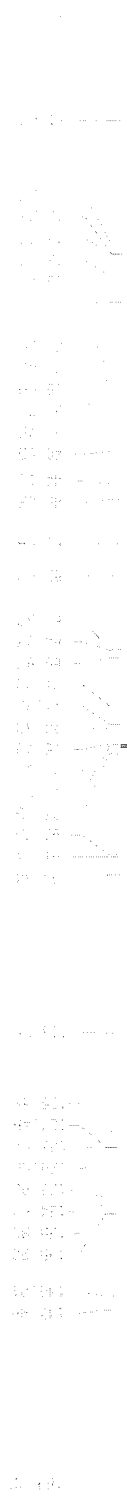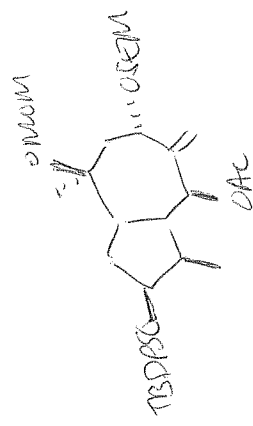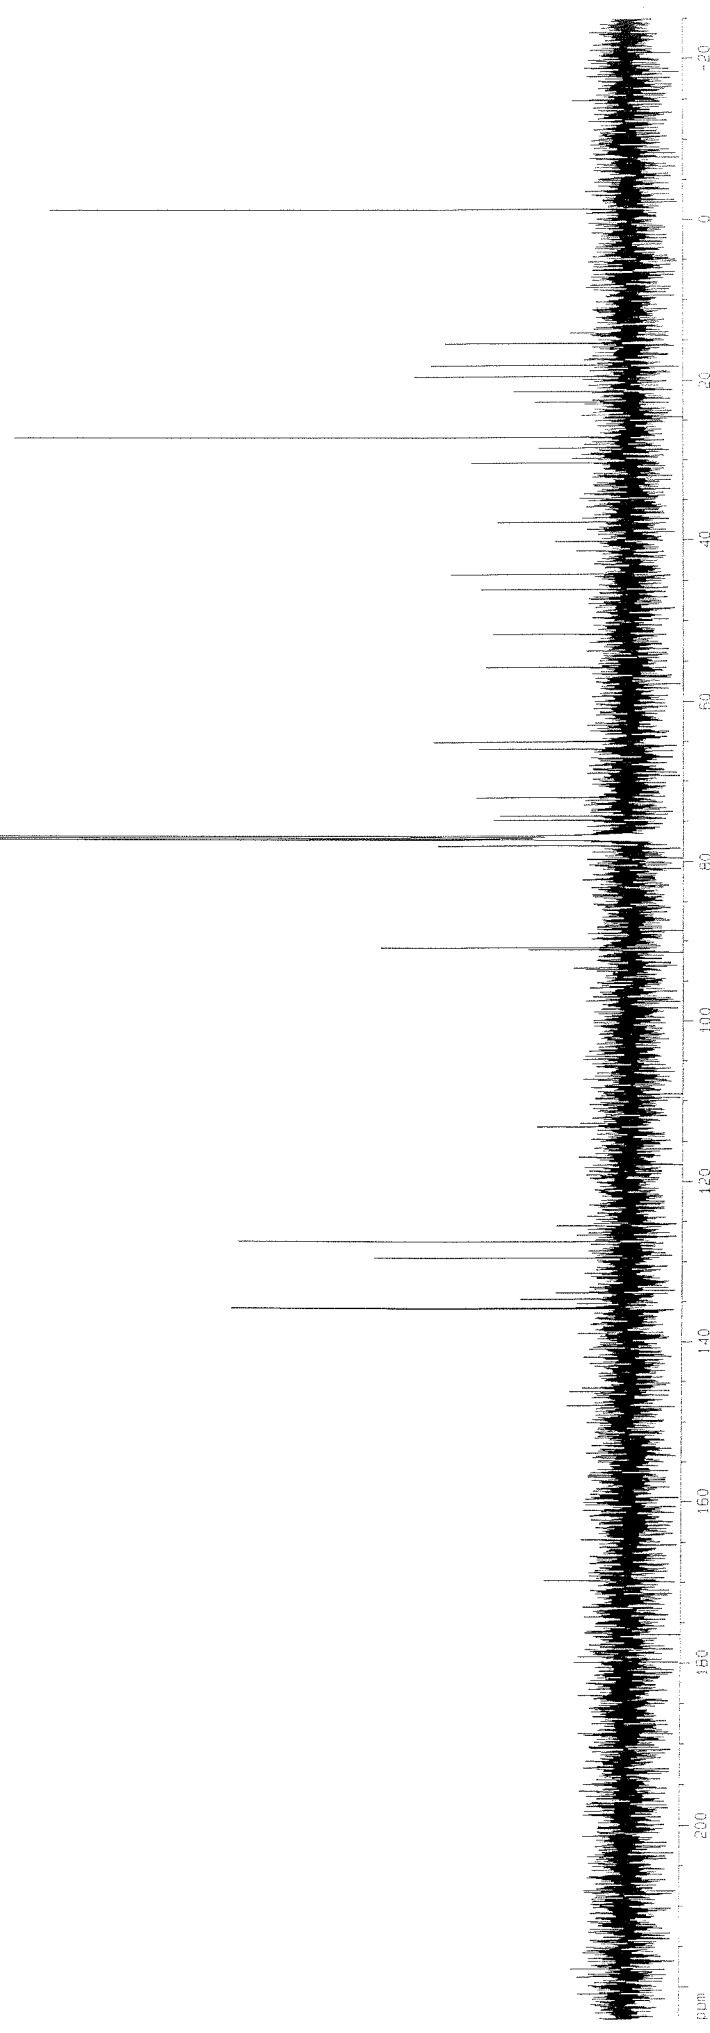

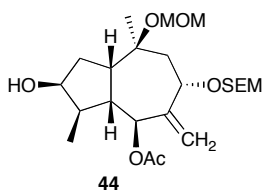

**Alcohol 44:** TBAF solution (4.0 mL, 4.0 mmol, 1.0 M in THF) was added to the silyl ether **43** (165 mg, 237  $\mu\text{mol}$ ) and the resulting mixture was stirred at room temperature for 12 hours. The mixture was poured into water (20 mL) and extracted with EtOAc (3  $\times$  20 mL). The combined organics were washed with brine (50 mL), dried ( $\text{MgSO}_4$ ) and concentrated *in vacuo*. Column chromatography ( $\text{SiO}_2$ ,  $\text{Et}_2\text{O}$ /petrol ether, 3:2) afforded the alcohol as a colourless oil, 95.8 mg, 88%;  $\delta_{\text{H}}$  (600 MHz;  $\text{CDCl}_3$ ) 5.19 (1H, d,  $J$  8.4, H-6), 5.18 (1H, s, =CH), 5.08 (1H, s, =CH'), 4.74 (1H, d,  $J$  7.2, O-10- $\text{CH}_2\text{O}$ ), 4.67 (1H, d,  $J$  7.2, O-10- $\text{CH}_2\text{O}$ ), 4.63 (1H, d,  $J$  7.1, O-8- $\text{CH}_2\text{O}$ ), 4.58 (1H, d,  $J$  7.1, O-8- $\text{CH}_2\text{O}$ ), 4.43 (1H, dd,  $J$  9.2, 6.3, H-8), 4.14 (1H, m, H-3), 3.74 (1H, ddd,  $J$  16.5, 6.8, 6.6,  $\text{SiCH}_2\text{CH}_2$ ), 3.52 (1H, ddd,  $J$  16.5, 6.6, 6.4,  $\text{SiCH}_2\text{CH}_2$ ), 3.36 (3H, s,  $\text{OCH}_3$ ), 2.76 (1H, m, H-1), 2.12 (1H, dd,  $J$  14.4, 6.3, H-9), 2.07 (3H, s,  $\text{C}(\text{O})\text{CH}_3$ ), 2.01 (1H, m, H-5), 1.94 (1H, m, H-4), 1.88 (1H, dd,  $J$  14.4, 9.2, H-9'), 1.71, (2H, m, H-2), 1.29 (3H, s, H-14), 1.12 (3H, d,  $J$  7.0, H-15), 0.94 (1H, ddd,  $J$  12.9, 6.8, 6.6,  $\text{SiCH}_2\text{CH}_2$ ), 0.93 (1H, ddd,  $J$  12.9, 6.6, 6.4,  $\text{SiCH}_2\text{CH}_2$ ) 0.02 (9H, s,  $\text{Si}(\text{CH}_3)_3$ ), (OH not observed);  $\delta_{\text{C}}$  (150 MHz;  $\text{CDCl}_3$ ) 169.9 (C=O), 146.3 (C-7), 113.3 (=CH<sub>2</sub>), 91.3 (O-8- $\text{CH}_2\text{O}$ ), 90.8 (O-10- $\text{CH}_2\text{O}$ ), 78.1 (C-10), 74.9 (C-6), 73.2 (C-3), 72.3 (C-8), 65.1 ( $\text{SiCH}_2\text{CH}_2$ ), 55.6 ( $\text{OCH}_3$ ), 51.2 (C-5), 46.5 (C-1), 43.8 (C-4), 40.8 (C-9), 38.0 (C-2), 28.2 (C-14), 21.3 ( $\text{C}(\text{O})\text{CH}_3$ ), 18.1 ( $\text{SiCH}_2\text{CH}_2$ ), 14.3 (C-15), -1.4 ( $\text{Si}(\text{CH}_3)_3$ );  $\nu_{\text{max}}$  (film;  $\text{cm}^{-1}$ ) 3453 (br OH), 1740 (C=O), 835 ( $\text{Si}(\text{CH}_3)_3$ );  $[\alpha]_{\text{D}} -59.7$  (*c.* 0.64,  $\text{CHCl}_3$ ); found (ESI+)  $[\text{MNa}]^+$  481.2590;  $\text{C}_{23}\text{H}_{42}\text{O}_7\text{SiNa}$  requires  $M$ , 481.2598.

Standard 1H DDX-600

Stibic

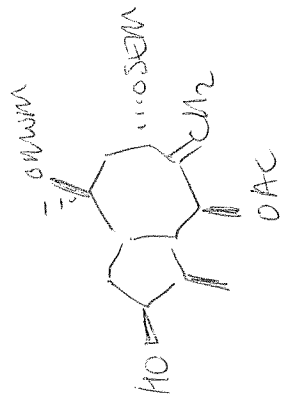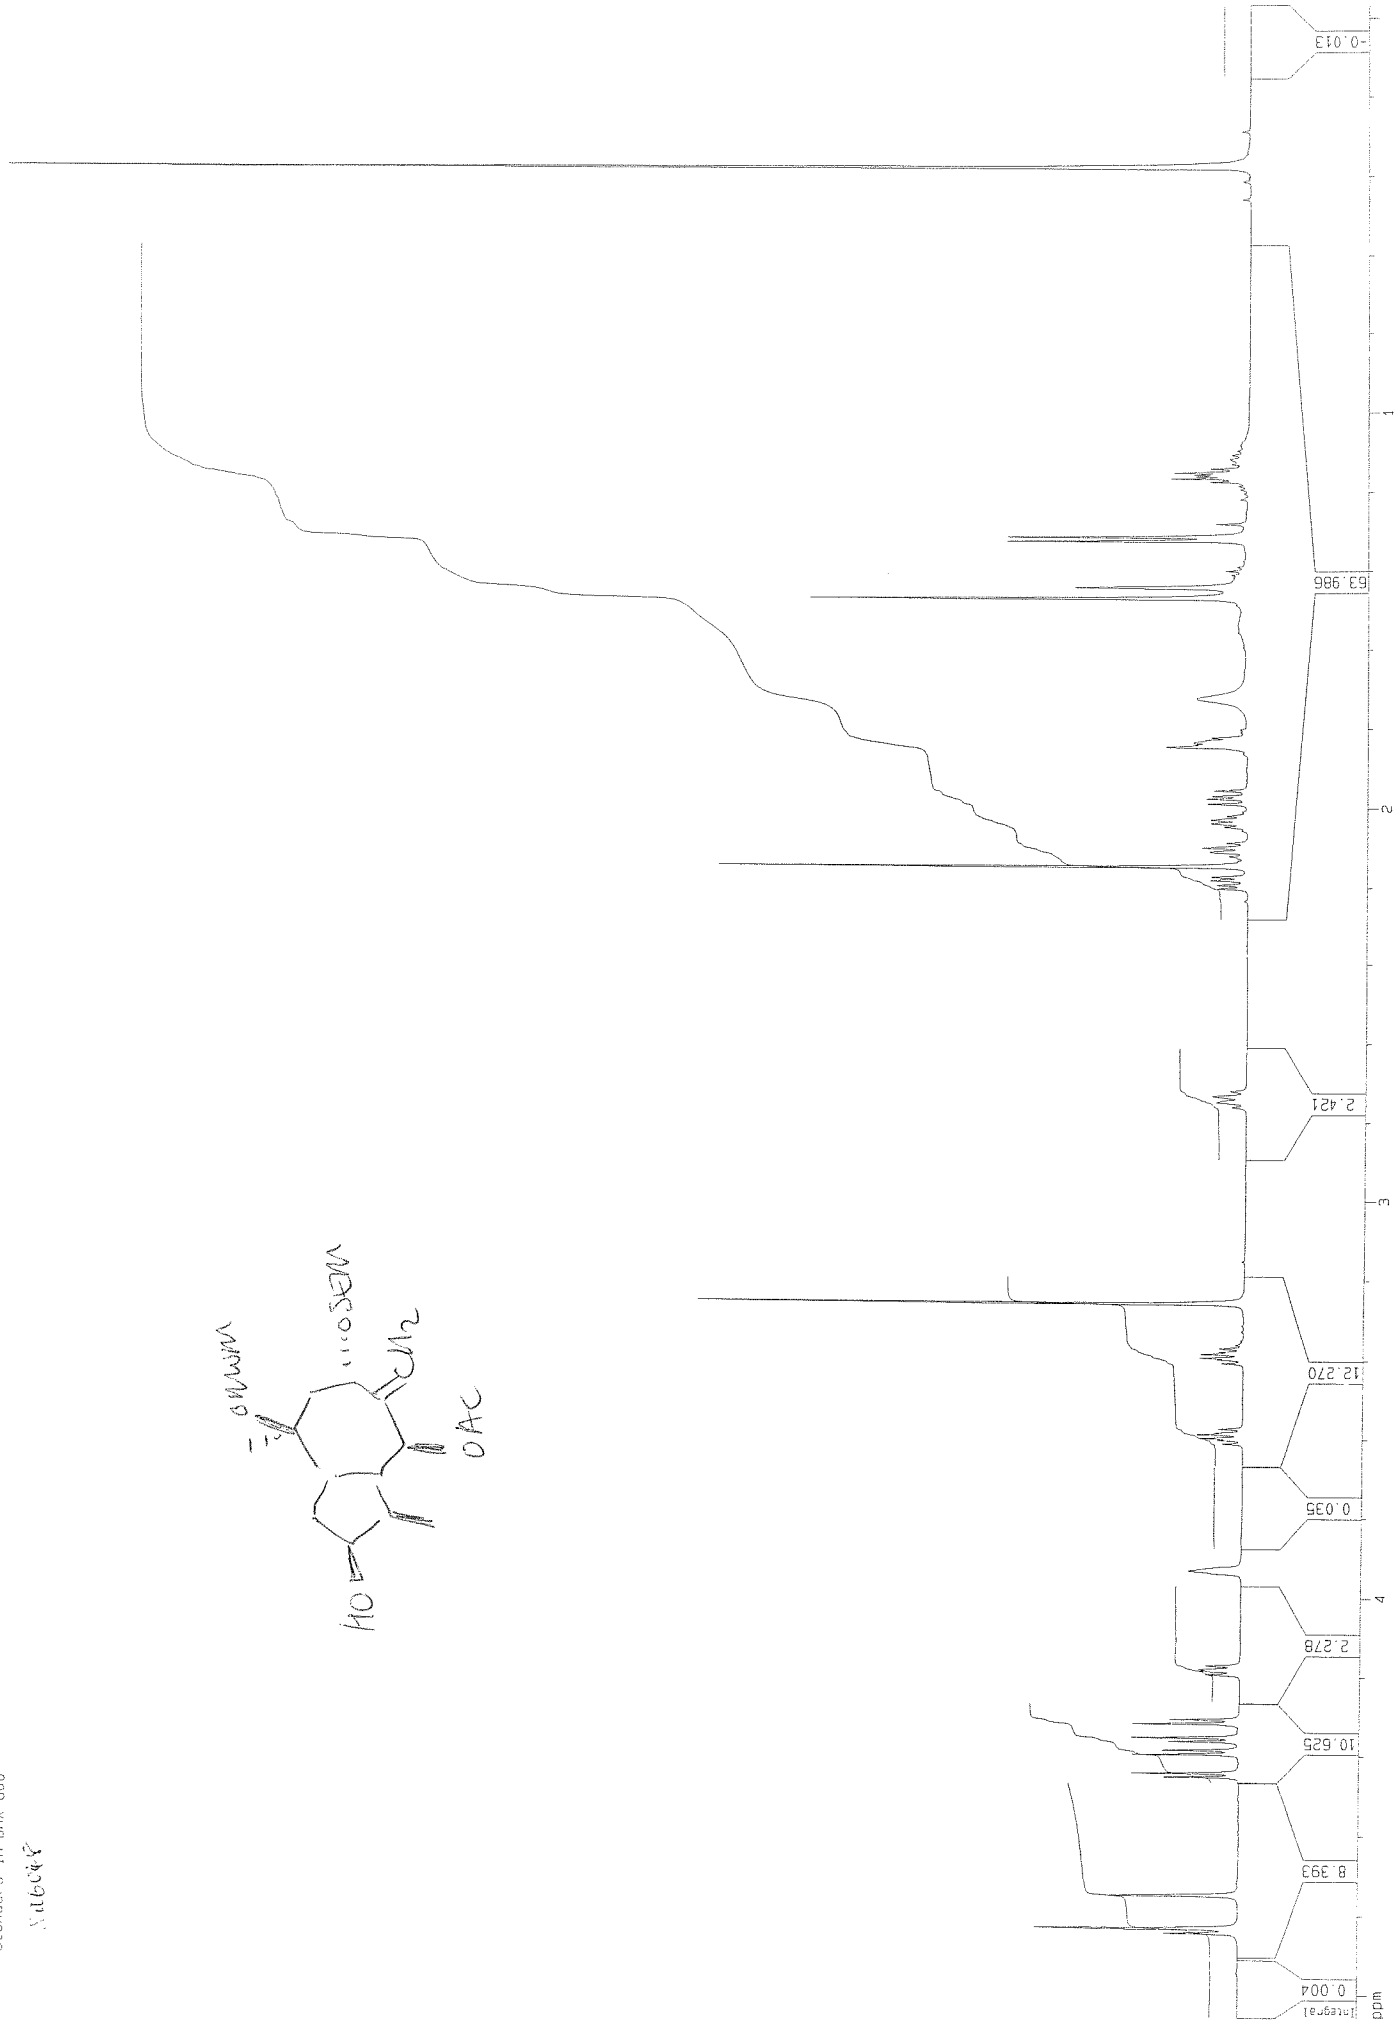

Standard 13C DFX-600  
S6678

13.39  
14.31  
18.11  
21.28  
28.23  
38.02  
40.76  
43.84  
48.47  
51.17  
55.65  
65.06  
72.32  
73.15  
74.94  
76.79  
77.00  
77.21  
78.13  
90.76  
91.25  
113.30  
146.28  
169.87

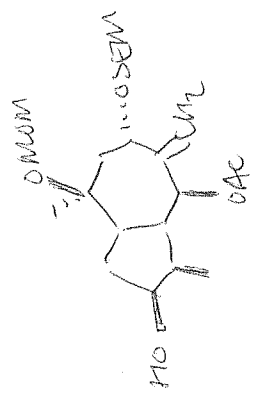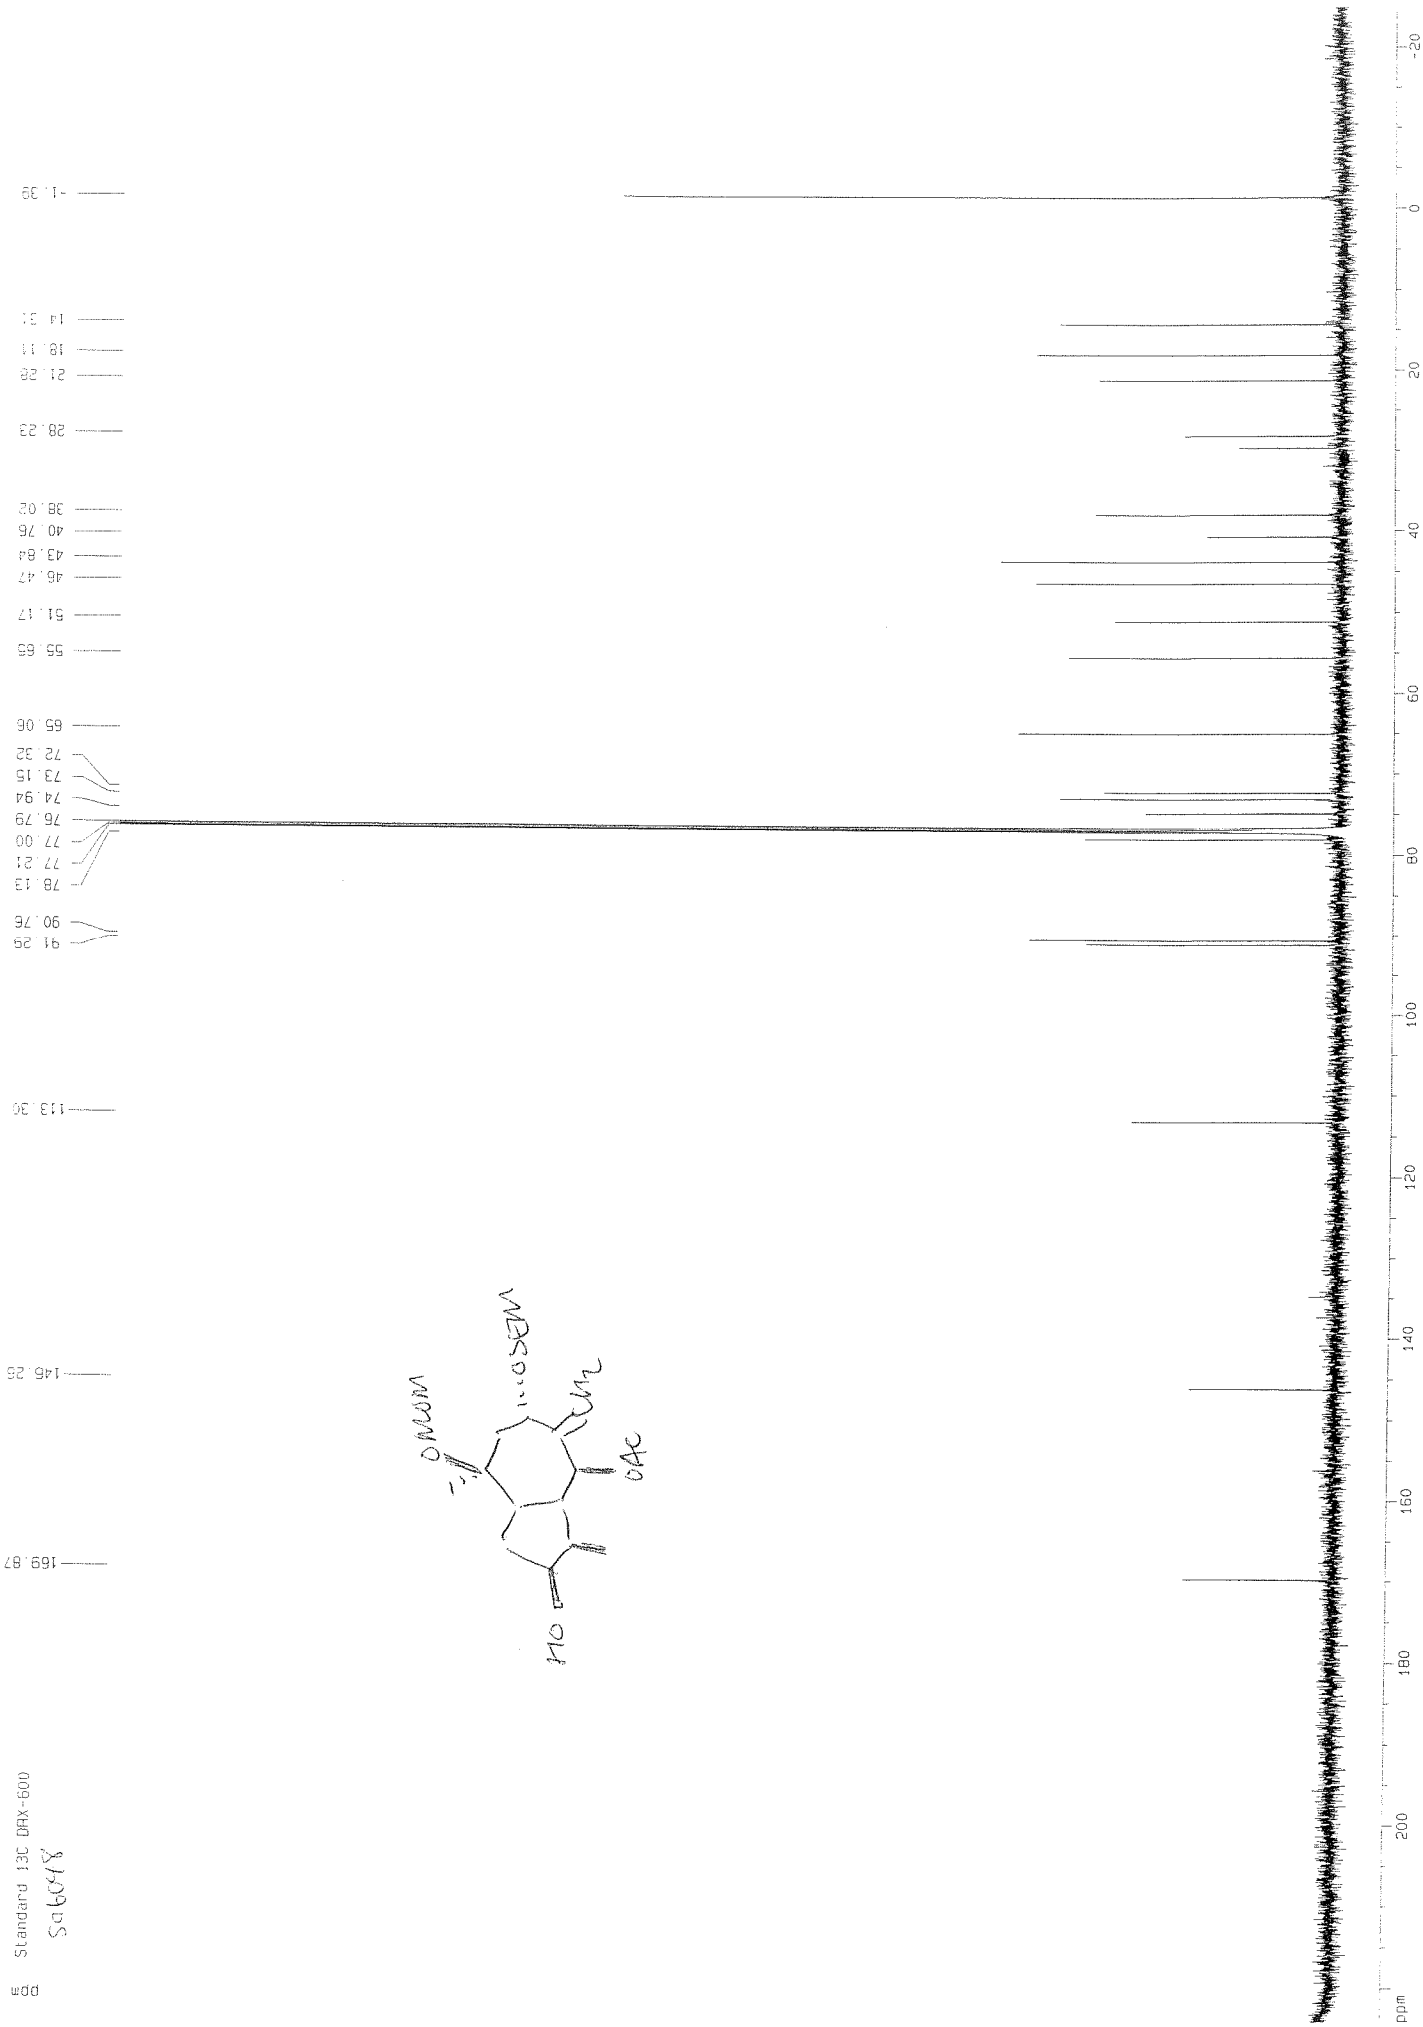

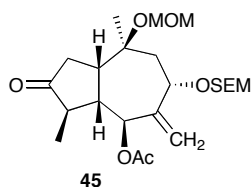

**Ketone 45:** *Procedure A:* A stirring mixture of alcohol **45** (12.5 mg, 27.3  $\mu\text{mol}$ ), NMO (20 mg, 93.9  $\mu\text{mol}$ ), 4 Å MS (60 mg) and  $\text{CH}_2\text{Cl}_2$  was treated with TPAP (2.0 mg, 5.6  $\mu\text{mol}$ ). After 1 hour at room temperature, the reaction was quenched with saturated sodium sulfite solution (20 mL) and extracted with  $\text{CH}_2\text{Cl}_2$  ( $2 \times 30$  mL). The combined organic extracts were washed with copper sulfate solution (30 mL), brine (30 mL), then dried ( $\text{MgSO}_4$ ) and evaporated under reduced pressure. The crude black material was purified by column chromatography ( $\text{SiO}_2$ ,  $\text{Et}_2\text{O}$ /petrol ether, 1:1) to afford the ketone as a colourless oil, 8.4, 67%.

*Procedure B:* Dess-Martin periodinane (132 mg, 311  $\mu\text{mol}$ ) was added in two batches over 10 minutes to a suspension of alcohol **81** (93 mg, 202  $\mu\text{mol}$ ) and sodium bicarbonate (52 mg, 621  $\mu\text{mol}$ ) in  $\text{CH}_2\text{Cl}_2$  (1.0 mL). The resulting mixture was stirred at room temperature for 30 minutes then quenched by stirring with sodium thiosulfate solution (20 mL) and sodium bicarbonate solution (20 mL) for 30 minutes. The reaction was then extracted with  $\text{Et}_2\text{O}$  ( $3 \times 30$  mL) and the combined organic phases were washed with sodium bicarbonate solution (30 mL) then brine (30 mL). The ethereal layer was then dried ( $\text{MgSO}_4$ ), concentrated under reduced pressure and purified by column chromatography ( $\text{SiO}_2$ ,  $\text{Et}_2\text{O}$ /petrol ether 2:3) to afford the ketone, 73.8 mg, 80%.

$\delta_{\text{H}}$  (600 MHz;  $\text{CDCl}_3$ ) 5.30 (1H, d,  $J$  9.3, H-6), 5.27 (1H, s, =CH), 5.12 (1H, s, =CH'), 4.78 (1H, d,  $J$  7.4, O-10- $\text{CH}_2\text{O}$ ), 4.66 (1H, d,  $J$  7.2, O-8- $\text{CH}_2\text{O}$ ), 4.61 (1H, d,  $J$  7.4, O-10- $\text{CH}_2\text{O}'$ ), 4.60 (1H, d,  $J$  7.2, O-8- $\text{CH}_2\text{O}$ ), 4.41 (1H, dd,  $J$  6.8, 6.8, H-8), 3.76 (1H, ddd,  $J$  16.5, 6.6, 6.5,  $\text{SiCH}_2\text{CH}_2$ ), 3.51 (1H, ddd,  $J$  16.5, 6.4, 6.2,  $\text{SiCH}_2\text{CH}_2$ ), 3.36 (3H, s,  $\text{OCH}_3$ ), 2.69 (1H, m, H-1), 2.47 (1H, dd,  $J$  18.6, 9.6, H-2), 2.31 (2H, m, H-4 and H-5), 2.28 (1H, dd,  $J$  18.6, 8.3, H-2'), 2.18 (1H, dd,  $J$  15.1, 6.8, H-9), 2.08 (3H, s,  $\text{C}(\text{O})\text{CH}_3$ ), 2.08 (1H, m, H-9'), 1.26 (3H, s, H-14), 1.17 (3H, d,  $J$  7.0, H-15), 0.95 (2H, m,  $\text{SiCH}_2\text{CH}_2$ ), 0.03 (9H, s,  $\text{Si}(\text{CH}_3)_3$ );  $\delta_{\text{C}}$  (150 MHz;  $\text{CDCl}_3$ ) 219.1 (C-3), 169.4 ( $\text{C}(\text{O})\text{CH}_3$ ), 145.8 (C-7), 114.0 (=CH<sub>2</sub>), 91.1 (O-8- $\text{CH}_2\text{O}$ ), 90.7 (O-10- $\text{CH}_2\text{O}$ ), 78.4 (C-10), 73.1 (C-8), 72.1 (C-6), 65.1 ( $\text{SiCH}_2\text{CH}_2$ ), 55.9 ( $\text{OCH}_3$ ), 51.4 (C-5), 47.2 (C-4), 44.8 (C-1), 40.2 (C-9), 40.0 (C-2), 25.7 (C-14), 21.1 ( $\text{C}(\text{O})\text{CH}_3$ ), 18.1 ( $\text{SiCH}_2\text{CH}_2$ ), 16.2 (C-15), -1.4 ( $\text{Si}(\text{CH}_3)_3$ );  $\nu_{\text{max}}$  (film;  $\text{cm}^{-1}$ ) 2953 (C-H), 2920 (C-H), 1742 (C=O), 1647 (w C=C), 836 ( $\text{Si}(\text{CH}_3)_3$ );  $[\alpha]_{\text{D}} -65.5$  ( $c$ . 0.42,  $\text{CHCl}_3$ ); found (ESI+)  $[\text{MNa}]^+$  479.2463;  $\text{C}_{23}\text{H}_{40}\text{O}_7\text{Na}$  requires  $M$ , 479.2441.

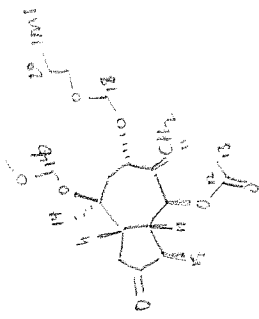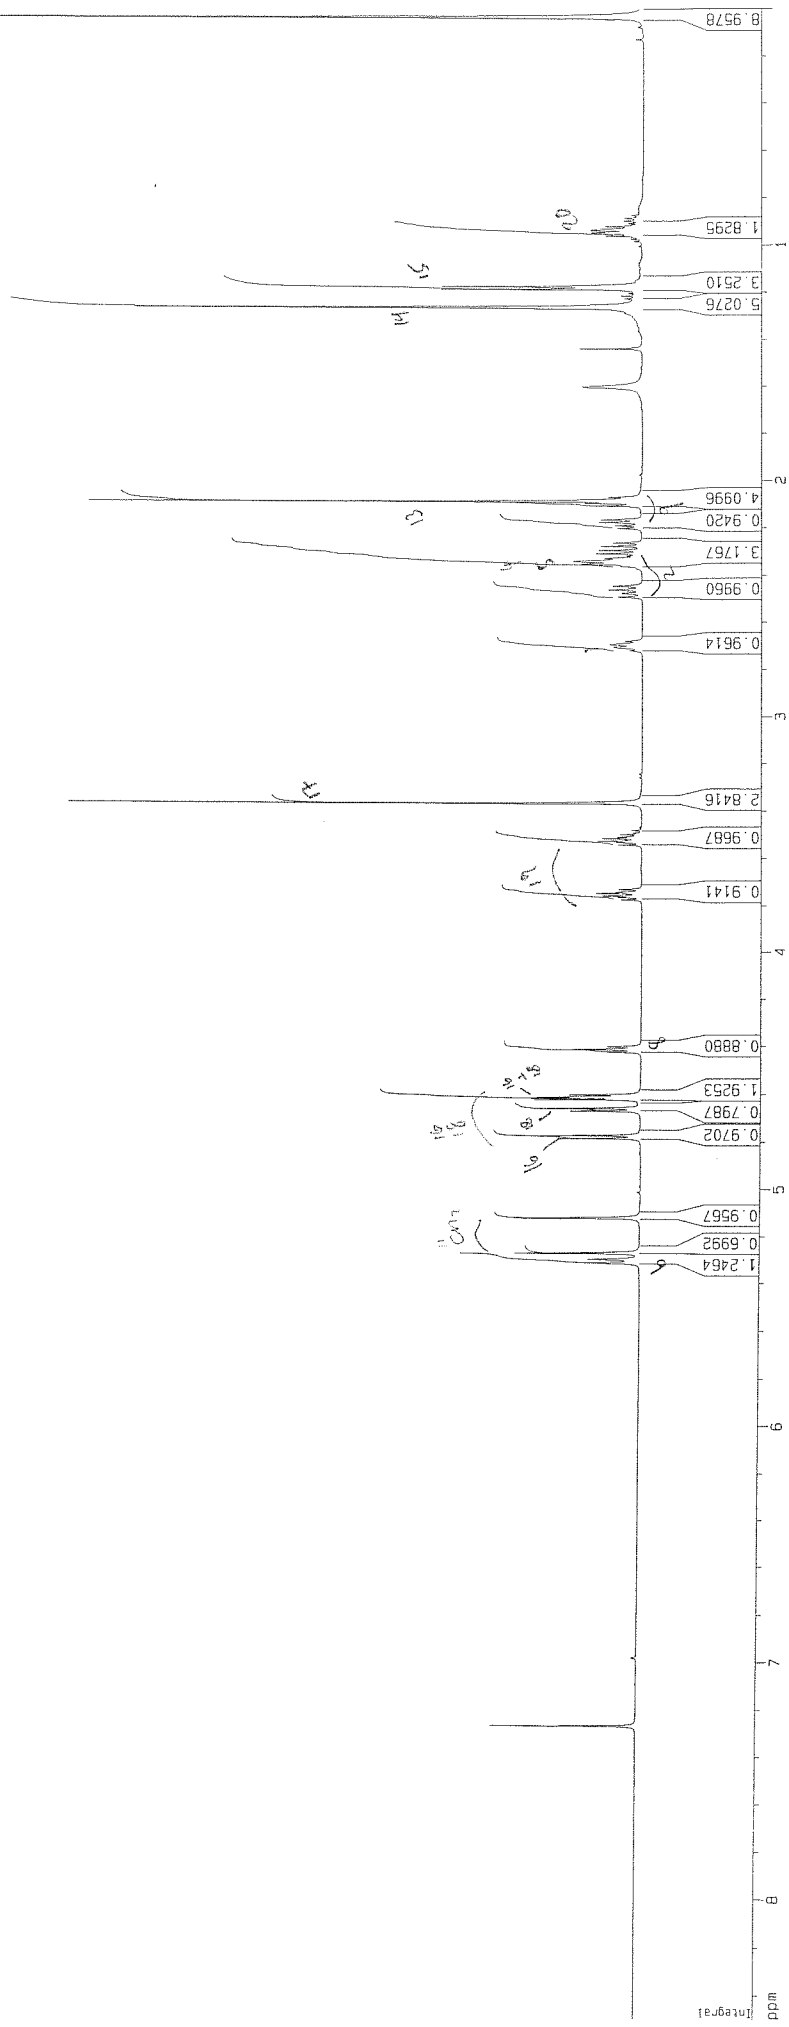



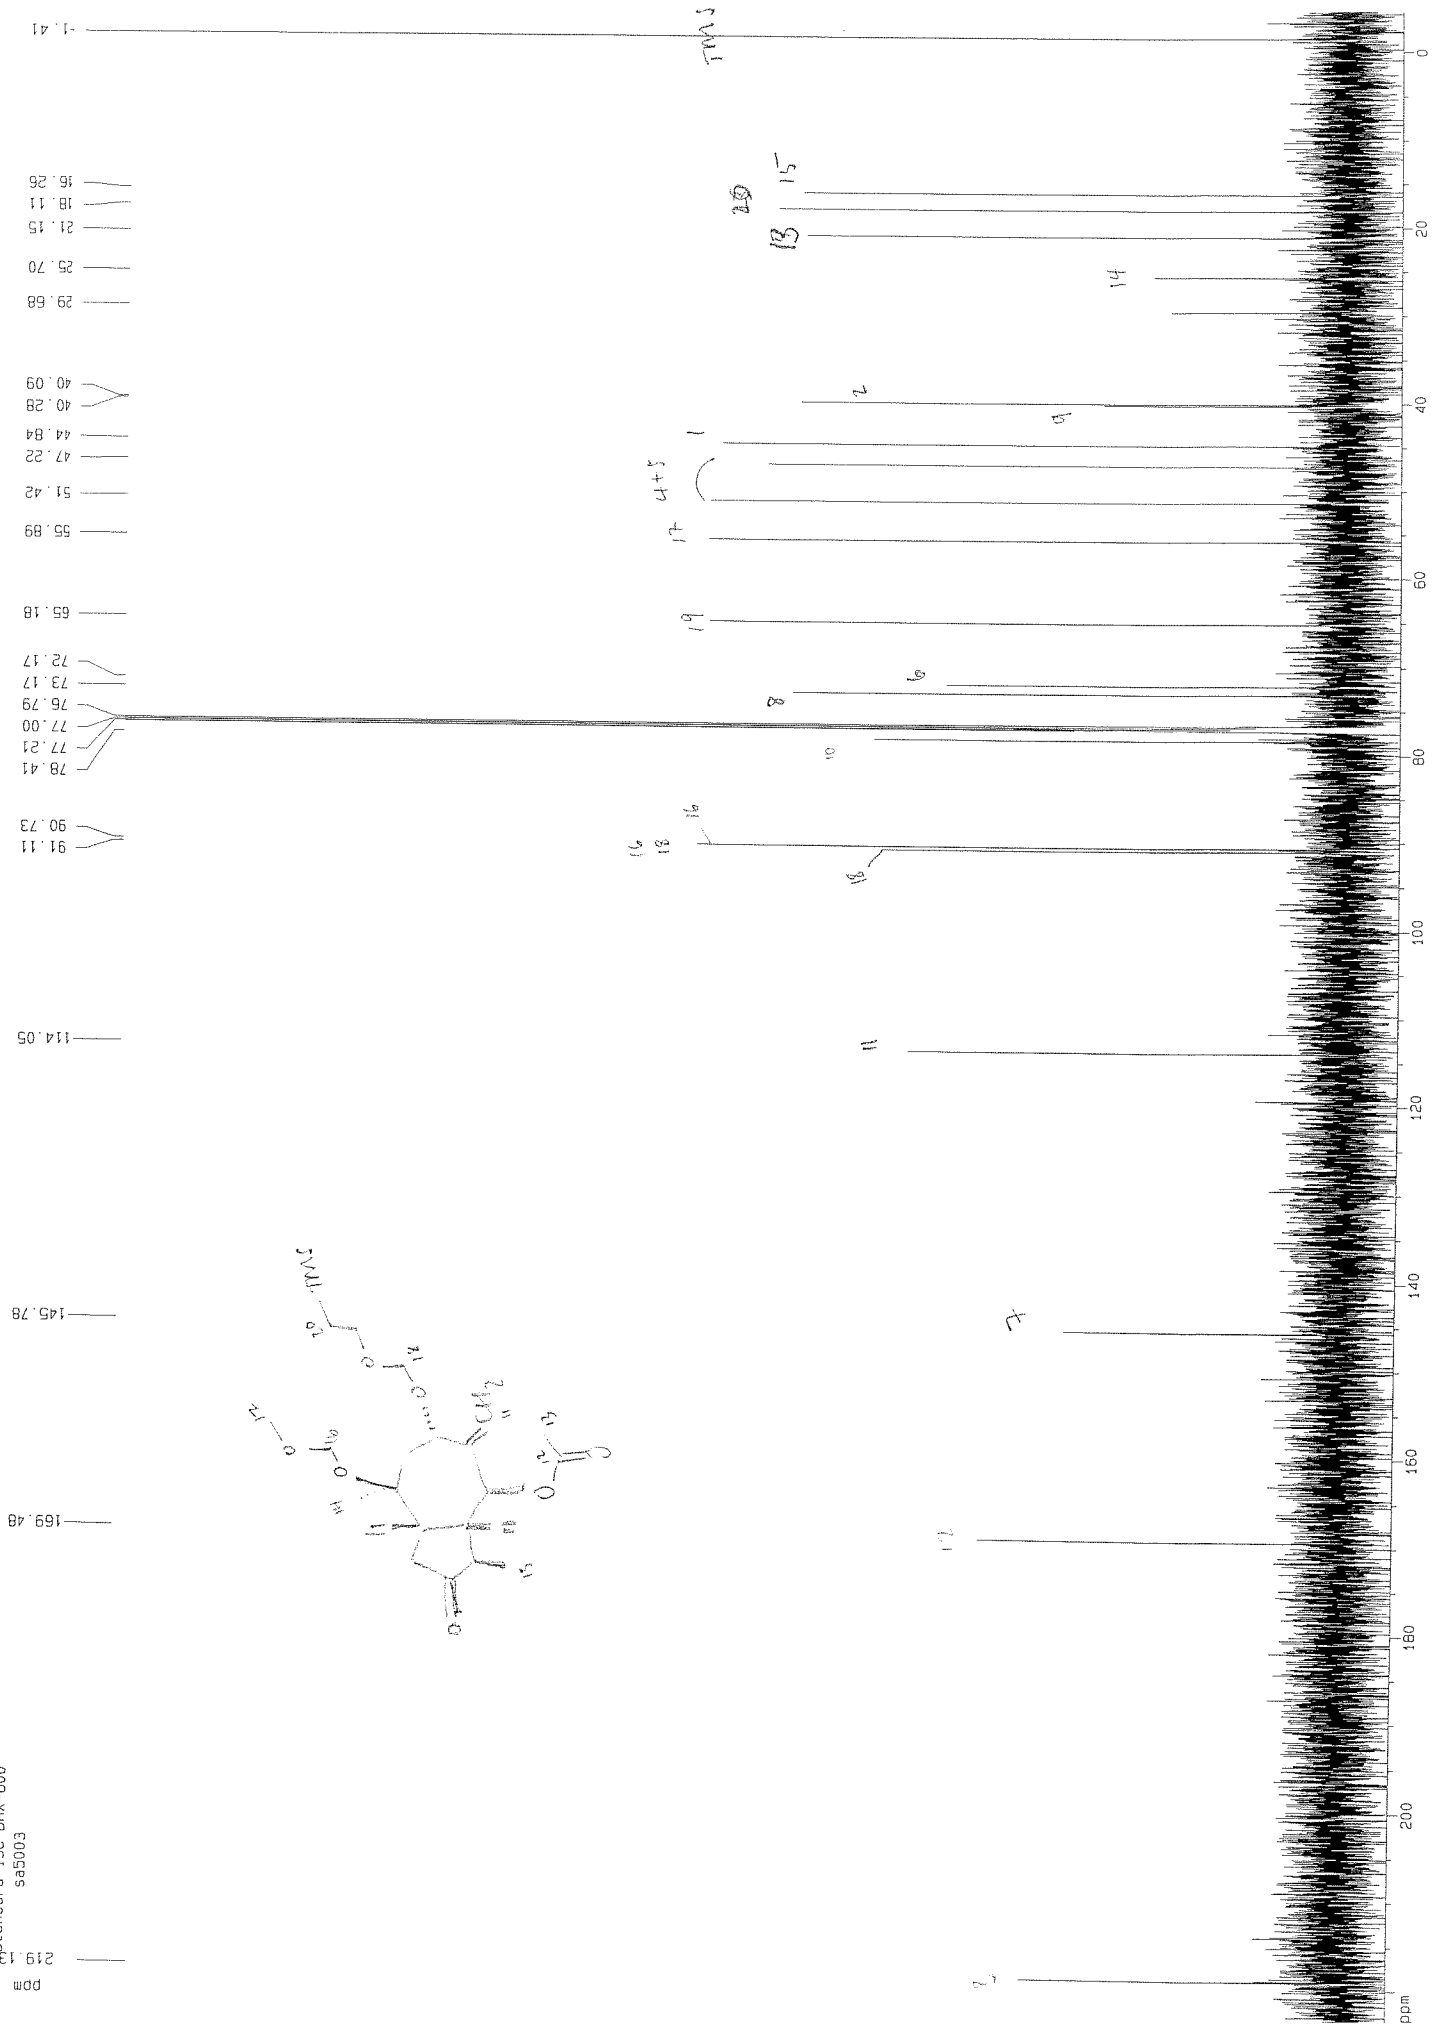

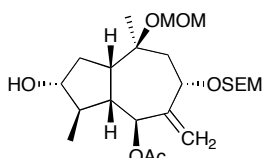

46

**Alcohol 46:** Sodium borohydride (21.0 mg, 560  $\mu\text{mol}$ ) was added to a solution of ketone **45** (85.3 mg, 187  $\mu\text{mol}$ ) in MeOH (1.0 mL) at 0 °C. The resulting mixture was stirred at 0 °C for 2 hours then quenched with saturated ammonium chloride solution (20 mL) and extracted with EtOAc (3  $\times$  20 mL). The combined organic phases were washed with brine (50 mL), dried ( $\text{MgSO}_4$ ) and evaporated under reduced pressure. Column chromatography ( $\text{SiO}_2$ ,  $\text{Et}_2\text{O}$  /petrol ether, 2:3 increasing to neat  $\text{Et}_2\text{O}$ ) afforded the alcohol as a single C-3 isomer; 63.7 mg, 74%;  $\delta_{\text{H}}$  (600 MHz;  $\text{CDCl}_3$ ) 5.29 (1H, d,  $J$  9.7, H-6), 5.24 (1H, s, =CH), 5.05 (1H, s, =CH'), 4.73 (1H, d,  $J$  7.3, O-10- $\text{CH}_2\text{O}$ ), 4.65 (1H, d,  $J$  7.2, O-8- $\text{CH}_2\text{O}$ ), 4.58 (1H, d,  $J$  7.3, O-10- $\text{CH}_2\text{O}$ ), 4.56 (1H, d,  $J$  7.2, O-8- $\text{CH}_2\text{O}$ ), 4.37 (1H, dd,  $J$  9.4, 6.4, H-8), 3.73 (2H, m, H-3 and  $\text{SiCH}_2\text{CH}_2$ ), 3.50 (1H, m,  $\text{SiCH}_2\text{CH}_2$ ), 3.34 (3H, s,  $\text{OCH}_3$ ), 2.33 (1H, m, H-1), 2.11 (1H, dd,  $J$  14.4, 6.4, H-9), 2.07 (3H, s,  $\text{C}(\text{O})\text{CH}_3$ ), 2.02 (1H, m, H-2), 1.96 (1H, dd,  $J$  14.4, 9.4, H-9'), 1.89 (1H, m, H-5), 1.72, (1H, m, H-4), 1.54 (1H, m, H-2'), 1.27 (3H, s, H-14), 1.13 (3H, d,  $J$  7.0, H-15), 0.93 (2H, m,  $\text{SiCH}_2\text{CH}_2$ ), 0.02 (9H, s,  $\text{Si}(\text{CH}_3)_3$ ) (OH signal not observed);  $\delta_{\text{C}}$  (150 MHz;  $\text{CDCl}_3$ ) 169.9 ( $\text{C}(\text{O})\text{CH}_3$ ), 146.2 (C-7), 113.7 (=CH<sub>2</sub>), 90.8 (O-10- $\text{CH}_2\text{O}$ ), 90.7 (O-8- $\text{CH}_2\text{O}$ ), 78.2 (C-3), 78.0 (C-10), 74.1 (C-6), 72.6 (C-8), 65.0 ( $\text{SiCH}_2\text{CH}_2$ ), 55.8 ( $\text{OCH}_3$ ), 52.5 (C-5), 46.7 (C-4), 46.0 (C-1), 39.5 (C-9), 37.8 (C-2), 28.3 (C-14), 21.2 ( $\text{C}(\text{O})\text{CH}_3$ ), 19.2 (C-15), 18.1 ( $\text{SiCH}_2\text{CH}_2$ ), -1.4 ( $\text{Si}(\text{CH}_3)_3$ );  $\nu_{\text{max}}$  (film;  $\text{cm}^{-1}$ ) 3449 (br OH), 1742 (C=O), 1647 (w C=C), 836 ( $\text{Si}(\text{CH}_3)_3$ );  $[\alpha]_{\text{D}} -97.0$  (c. 0.635,  $\text{CHCl}_3$ ); found (ESI+)  $[\text{MNa}]^+$  481.2615;  $\text{C}_{23}\text{H}_{42}\text{O}_7\text{SiNa}$  requires  $M$ , 481.2598.

Standard 1H DRX-500  
sa5006

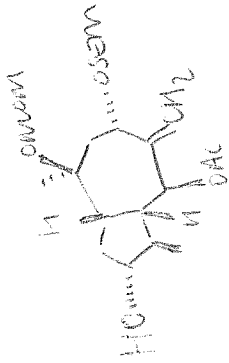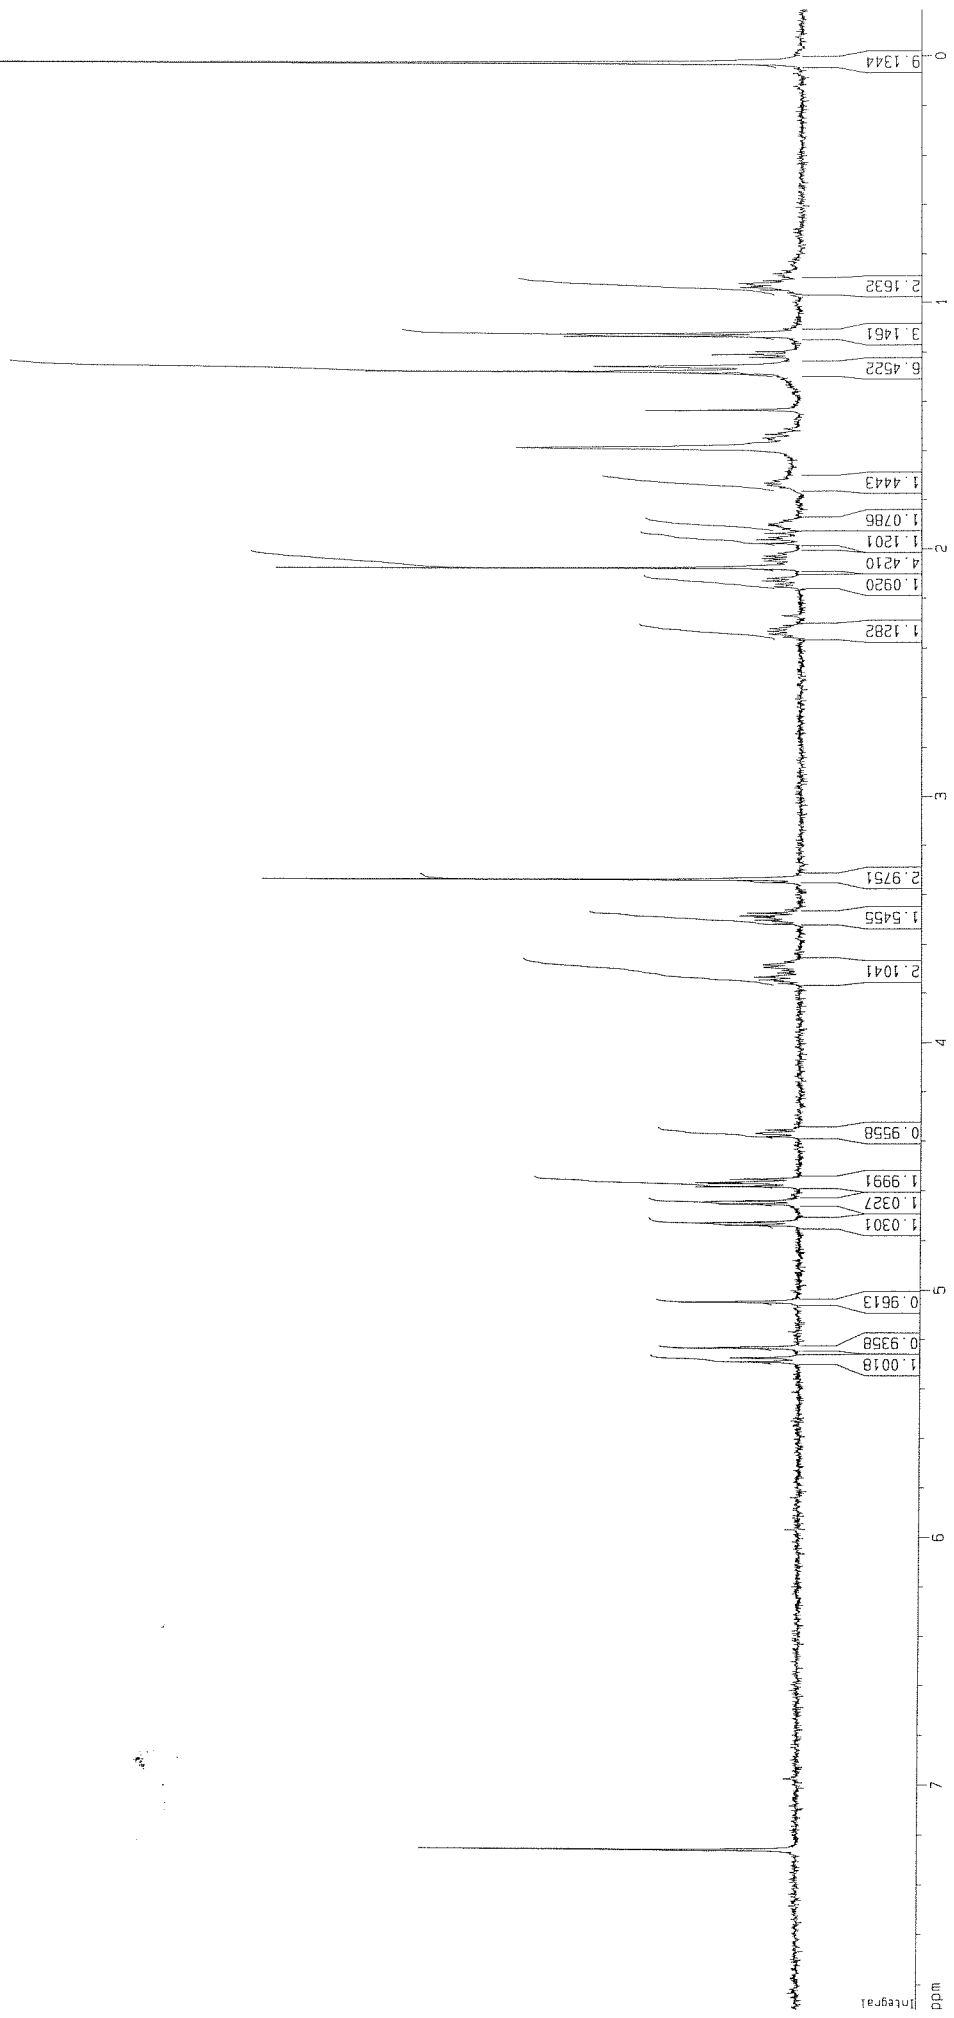

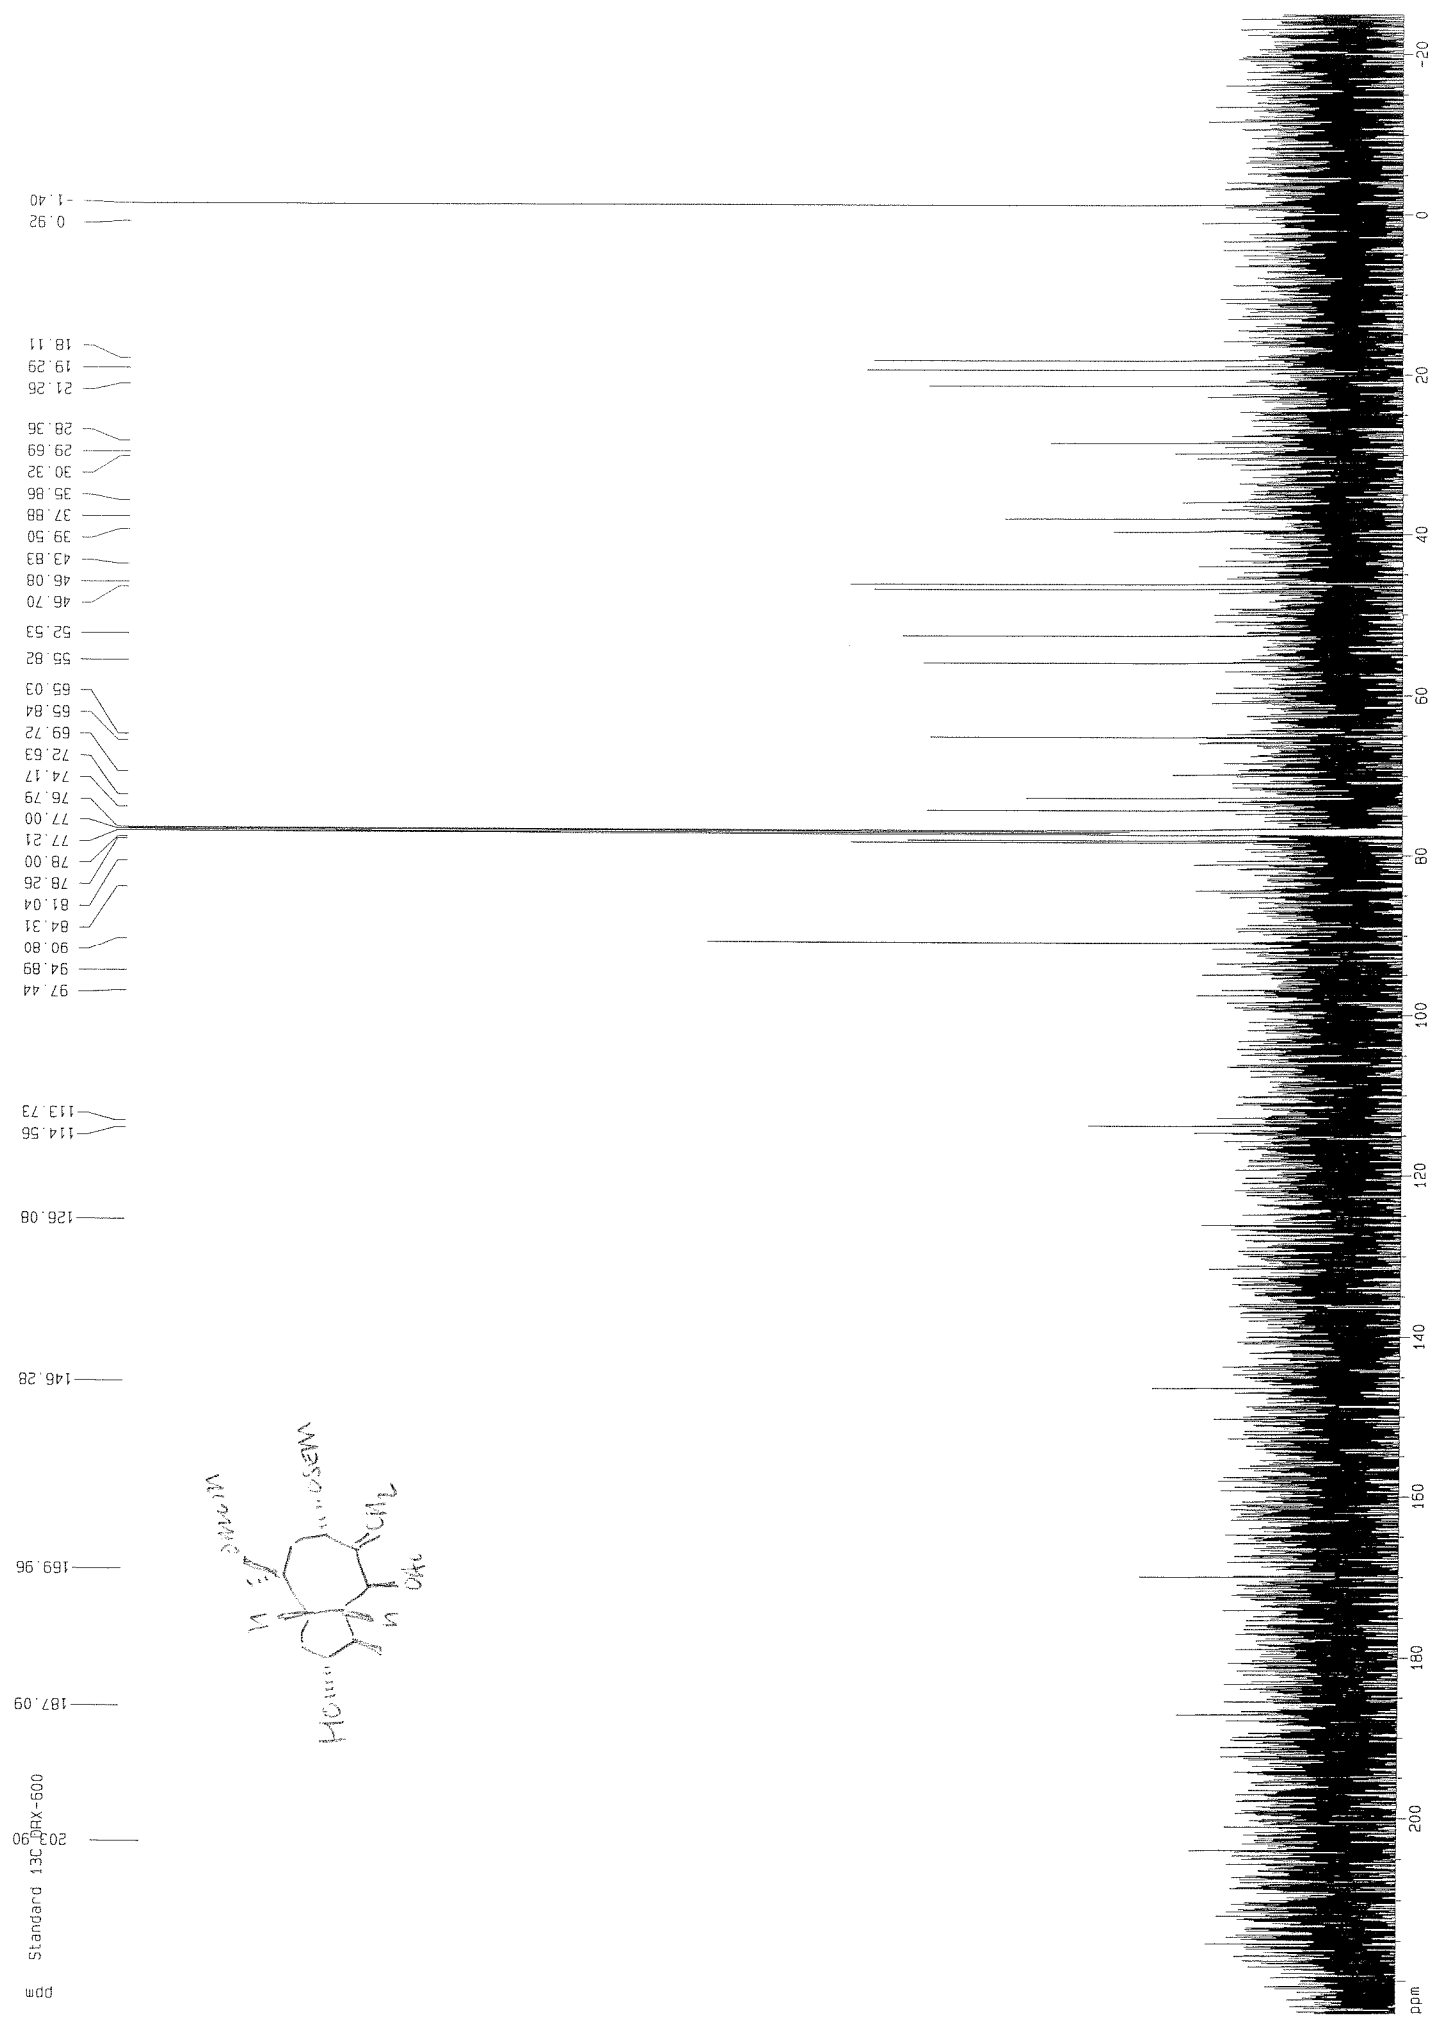

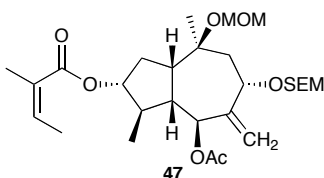

**Angelate 47:** *Procedure A:* A toluene solution (600  $\mu$ L) of preformed anhydride **37** (27.7 mg, 90.3  $\mu$ mol) was added to a mixture of sodium bicarbonate (12.6 mg, 151  $\mu$ mol) and alcohol **46** (13.8 mg, 30.1  $\mu$ mol) in PhMe (300  $\mu$ L). The resulting mixture was heated at 80  $^{\circ}$ C for 22 hours then cooled, quenched with sodium bicarbonate solution (20 mL) and extracted with Et<sub>2</sub>O (3  $\times$  20 mL). The combined extracts were washed with brine (40 mL), dried (MgSO<sub>4</sub>) and evaporated under reduced pressure. The residue was then purified by column chromatography (SiO<sub>2</sub>, Et<sub>2</sub>O/petrol ether, 1:9 then 1:4) to afford a colourless gum, 15.5 mg, 96%.

*Procedure B:* 2,4,6-Trichlorobenzoyl chloride (172  $\mu$ L, 1.10 mmol) was added to a solution of angelic acid (110 mg, 1.10 mmol) in toluene (1.0 mL) followed by Et<sub>3</sub>N (154  $\mu$ L, 1.10 mmol). The mixture was stirred at room temperature for 2 hours then treated with a solution of alcohol **46** (46.9 mg, 102  $\mu$ mol, previously azeotroped three times with toluene) in toluene (2.0 mL). The resulting mixture was stirred at 75  $^{\circ}$ C for 2 days, at this time a number of components were identified by TLC. The mixture was cooled, quenched with saturated ammonium chloride solution (20 mL) and extracted with Et<sub>2</sub>O (3  $\times$  20 mL). The combined organic extracts were washed with brine (30 mL), dried (MgSO<sub>4</sub>) and concentrated *in vacuo*. Column chromatography (SiO<sub>2</sub>, Et<sub>2</sub>O/petrol ether, 3:7 increasing gradually to 4:1) was used to fractionate the complex mixture into two mixtures, each containing two esters. Mixture A (49 mg) contained angelate **47** with loss of MOM, and the tiglate isomer. (The mixture was further separated by preparative HPLC to afford the angelate, 4.6 mg, 9.1% and tiglate, 2.1 mg, 4.2%, see supplementary information.) Mixture B (8.1 mg) contained desired angelate ester **47** and the isomeric tiglate ester. The mixture was further separated by preparative HPLC to afford the title compound, 1.6 mg, 2.9% and the tiglate, 2.0 mg, 3.6% (see supplementary information). [HPLC conditions (Agilent HP1100): *Column:* Berger Cyano 250mm  $\times$  10 mm. *Eluent:* 2% *i*PrOH/hexanes (95% *n*-hexane). *Flow rate:* 0 to 5 mins: 1 to 5 ml min<sup>-1</sup> and 5 ml min<sup>-1</sup> thereafter. *Detection:* diode array.]

$\delta_{\text{H}}$  (600 MHz; CDCl<sub>3</sub>) 6.05 (1H, q, *J* 7.2, C=C(H)CH<sub>3</sub>), 5.25 (1H, s, =CH), 5.21 (1H, d, *J* 10.3, H-6), 5.03 (1H, s, =CH'), 4.76 (1H, d, *J* 7.3, O-10-CH<sub>2</sub>O), 4.71 (1H, m, H-3), 4.67 (1H, d, *J* 7.2, O-8-CH<sub>2</sub>O), 4.57 (1H, d, *J* 7.3, O-10-CH<sub>2</sub>O), 4.55 (1H, d, *J* 7.2, O-8-CH<sub>2</sub>O), 4.37 (1H, dd, *J* 8.7, 7.6, H-8), 3.75 (1H, ddd, *J* 16.5, 6.7, 6.5, SiCH<sub>2</sub>CH<sub>2</sub>), 3.50 (1H, ddd, *J* 16.5, 7.2, 6.8, SiCH<sub>2</sub>CH<sub>2</sub>), 3.34 (3H, s, OCH<sub>3</sub>), 2.44 (1H, m, H-1), 2.29 (1H, m, H-2), 2.13 (2H, m, H-4 and H-9), 2.06 (3H, s, C(O)CH<sub>3</sub>), 1.1.97 (5H, m, H-5, H-9' and C=C(H)CH<sub>3</sub>), 1.86 (3H, s, C(O)CCH<sub>3</sub>), 1.57 (1H, m, H-2'), 1.26 (3H, s, H-14), 1.15 (3H, d, *J* 7.2, H-15), 0.93 (2H, m, SiCH<sub>2</sub>CH<sub>2</sub>), 0.03 (9H, s, Si(CH<sub>3</sub>)<sub>3</sub>);  $\delta_{\text{C}}$  (150 MHz; CDCl<sub>3</sub>) 169.4 (C(O)CH<sub>3</sub>), 168.1 (C(O)CCH<sub>3</sub>), 146.4 (C-7), 137.9 (C=C(H)CH<sub>3</sub>), 129.5 (C=C(H)CH<sub>3</sub>), 113.7 (=CH<sub>2</sub>), 90.8 (O-10-CH<sub>2</sub>O), 90.5 (O-8-CH<sub>2</sub>O), 79.6 (C-3), 78.0 (C-10), 73.1 (C-6), 72.7 (C-8), 65.0 (SiCH<sub>2</sub>CH<sub>2</sub>), 55.8 (OCH<sub>3</sub>), 52.5 (C-5), 46.6 (C-1), 43.3 (C-4), 38.8 (C-9), 34.7 (C-2), 28.2 (C-14), 21.1 (C(O)CH<sub>3</sub>), 20.5 (C(O)CCH<sub>3</sub>), 19.3 (C-15), 18.1 (SiCH<sub>2</sub>CH<sub>2</sub>), 15.7 (C=C(H)CH<sub>3</sub>), -1.4 (Si(CH<sub>3</sub>)<sub>3</sub>);  $\nu_{\text{max}}$  (film; cm<sup>-1</sup>) 2953 (C-H), 2928 (C-H), 1745 (acetate C=O), 1714 (angelate C=O), 1649 (w C=C), 836 (Si(CH<sub>3</sub>)<sub>3</sub>);  $[\alpha]_{\text{D}}$  -101.7 (*c.* 0.155, CHCl<sub>3</sub>); found (ESI+) [MNa]<sup>+</sup> 563.3010; C<sub>28</sub>H<sub>48</sub>O<sub>8</sub>Na requires *M*, 563.3016.

Standard 1H DFX-600  
sa500B

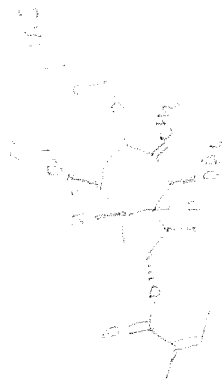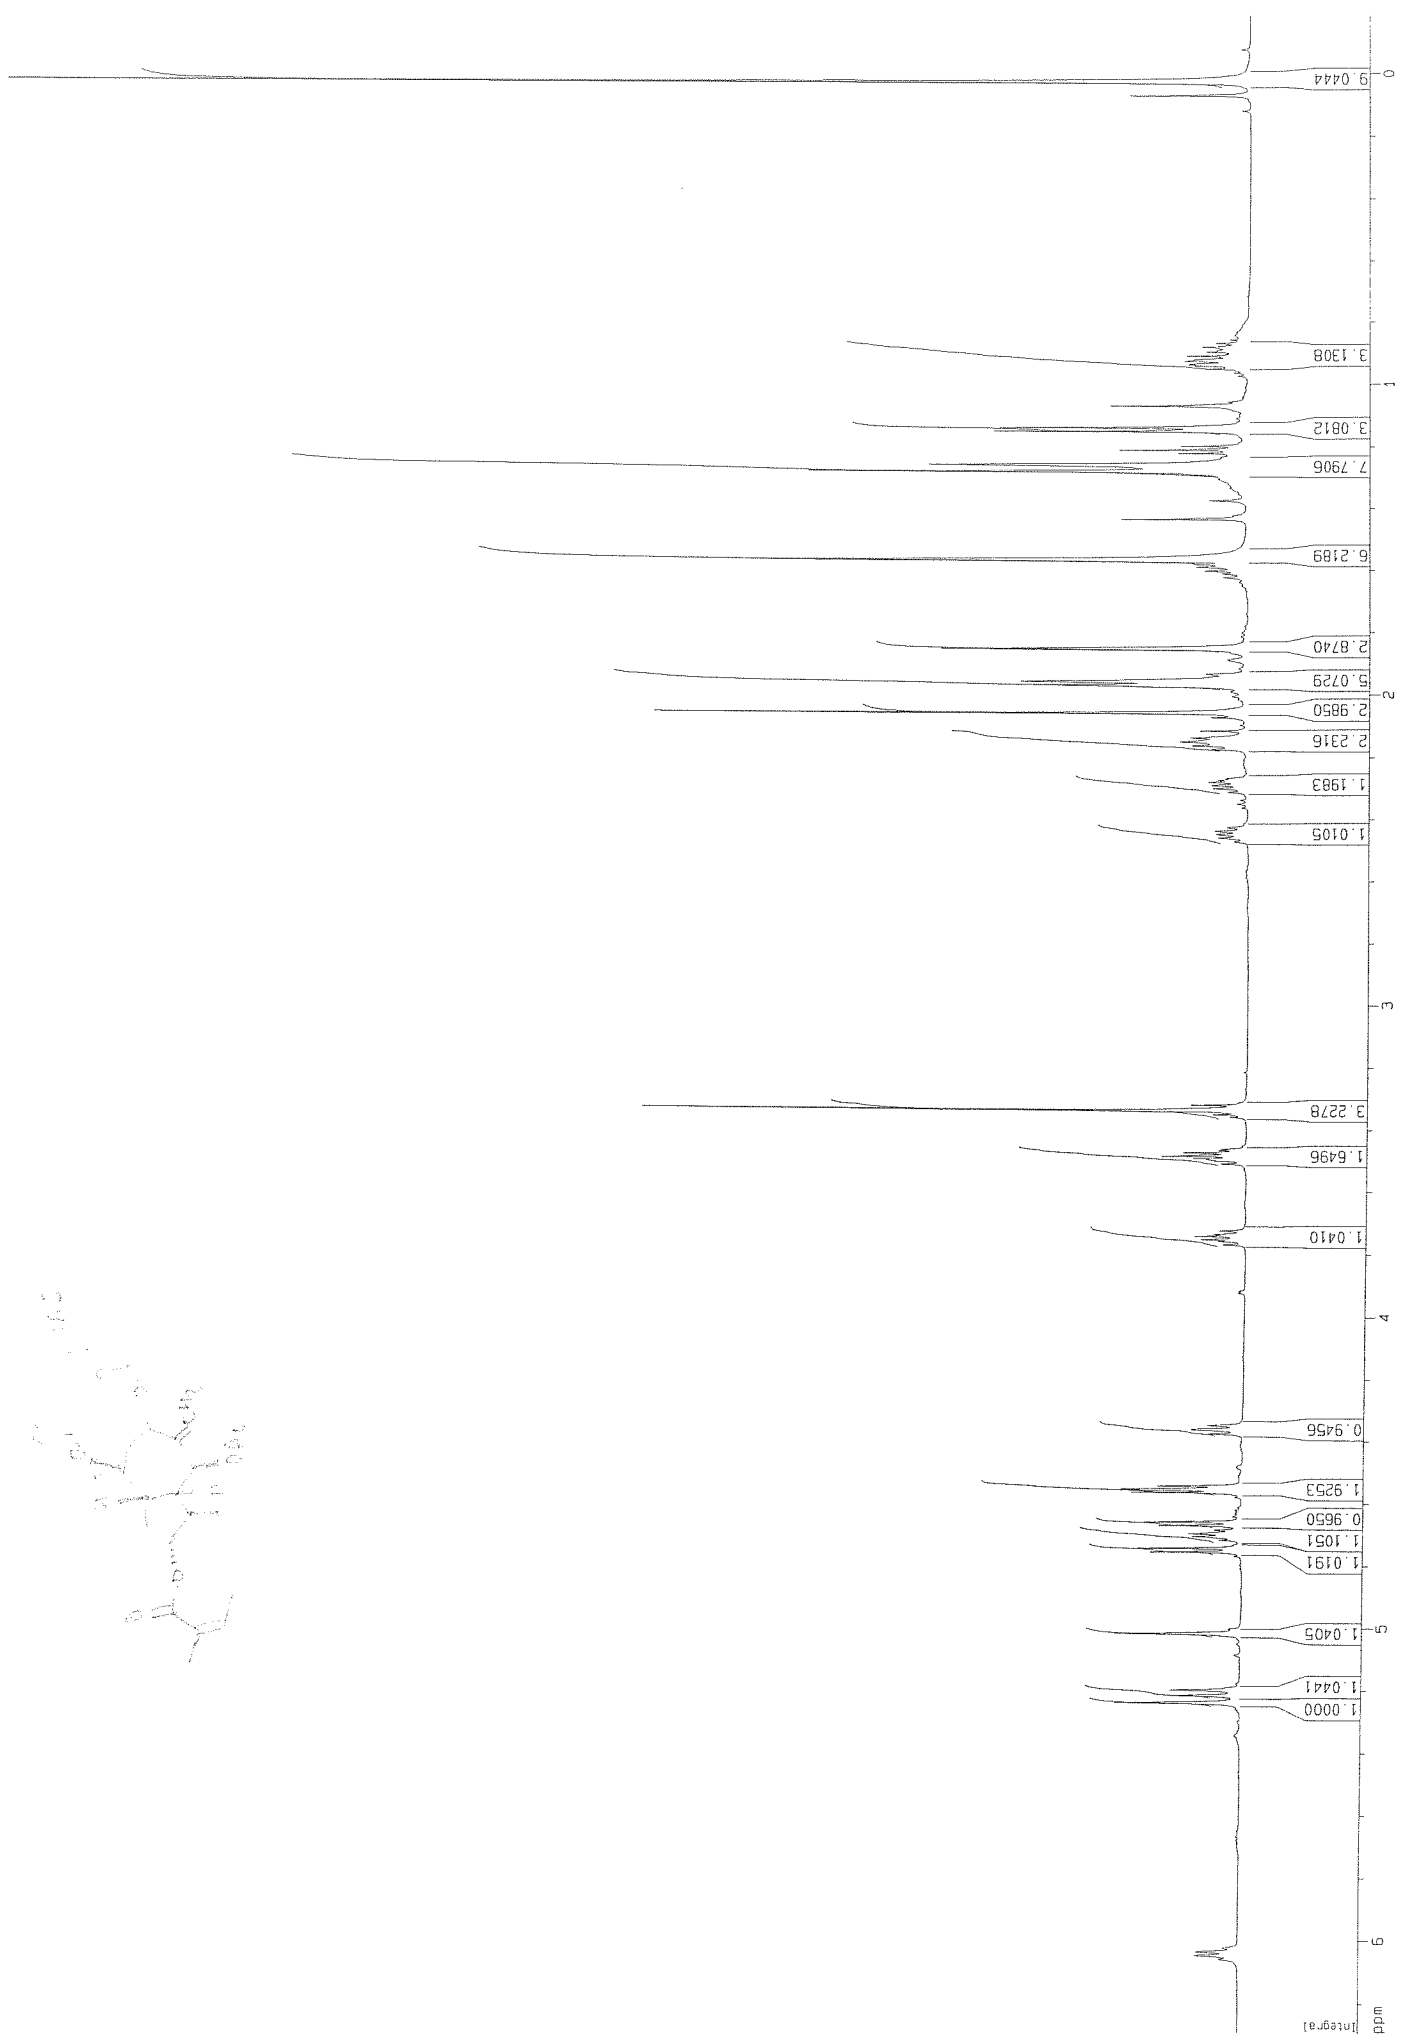

Standard 13C DFX-600

sa5008

ppm

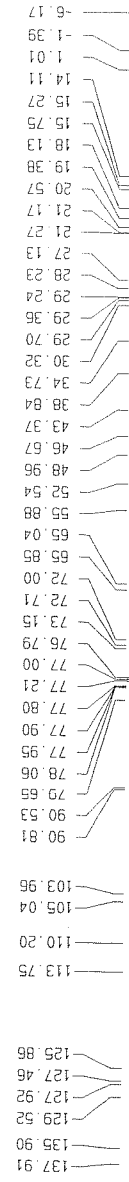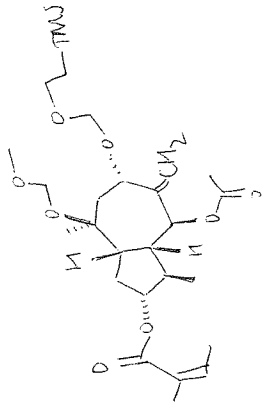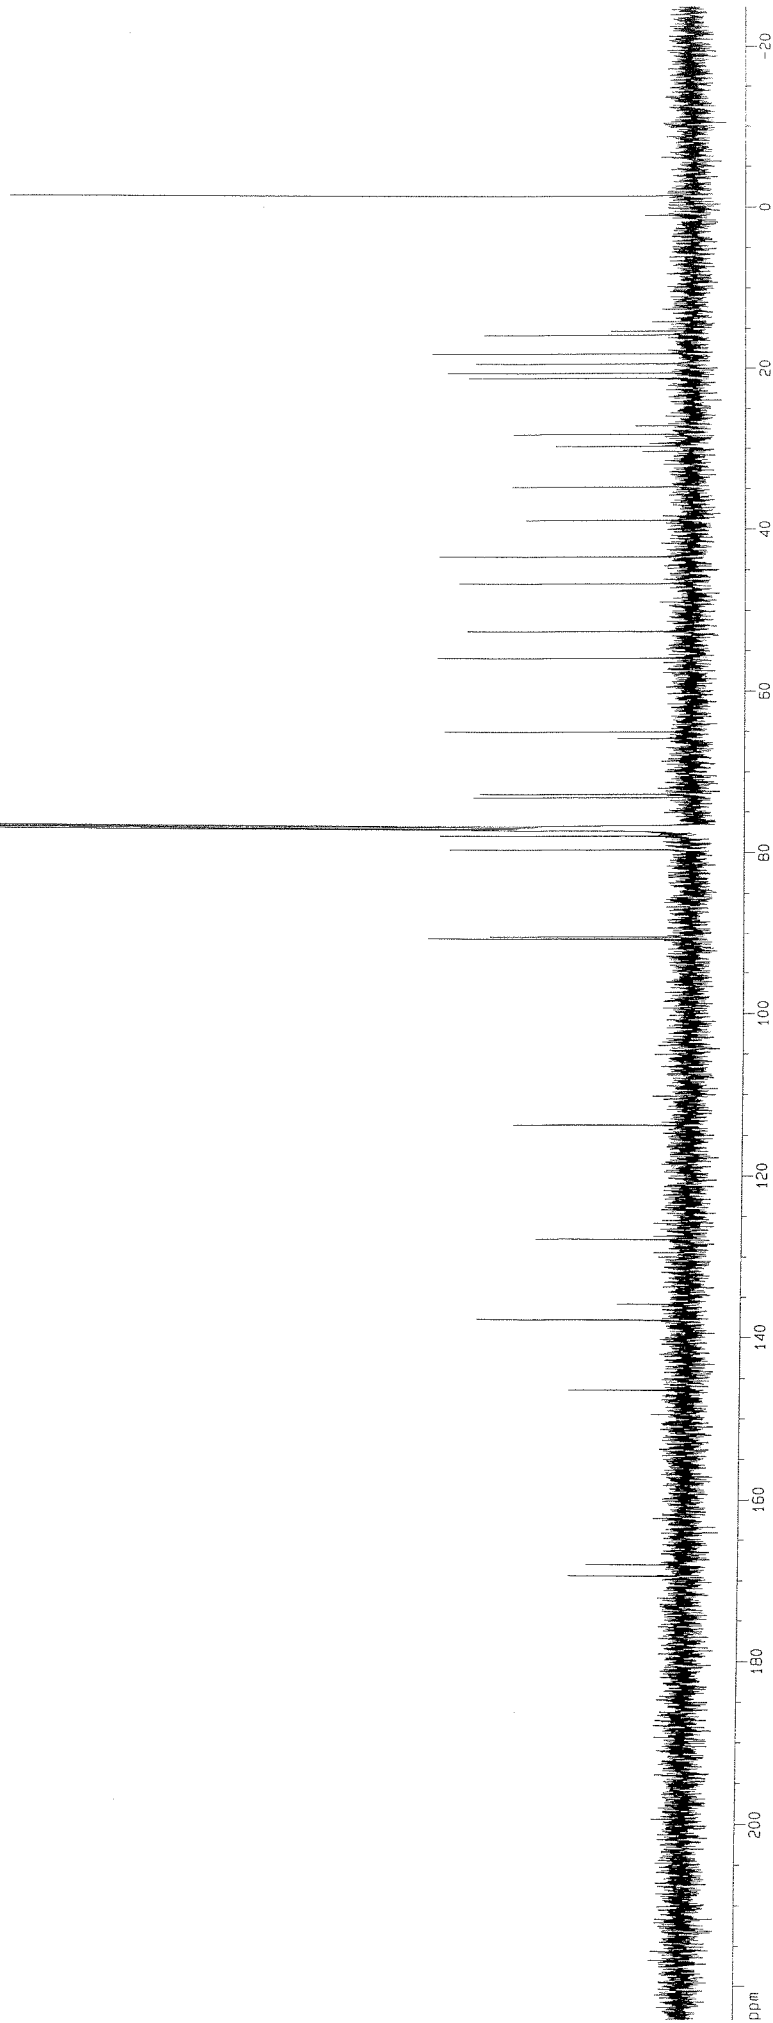

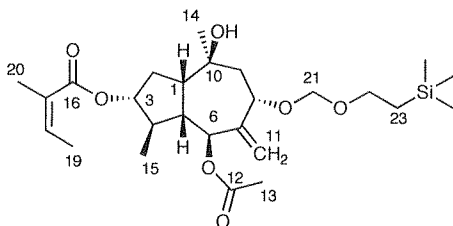

*This molecule was formed as an undesired side-product during the formation of angelate ester 47.*  $\delta_{\text{H}}$  (600 MHz;  $\text{CDCl}_3$ ) 6.05 (1H, q,  $J$  7.2, H-18), 5.35 (1H, d,  $J$  7.3, H-6), 5.29 (1H, s, H-11), 5.26 (1H, s, H-11'), 4.69 (1H, dd,  $J$  8.0, 6.9, H-3), 4.60 (2H, s, H-21), 4.44 (1H, dd,  $J$  10.0, 6.3, H-8), 3.73 (1H, ddd,  $J$  16.6, 7.0, 6.9, H-22), 3.51 (1H, ddd,  $J$  16.6, 6.9, 6.8, H-22'), 2.78 (1H, s, OH), 2.35-2.28 (2H, m, H-1 and H-2), 2.07 (3H, s, H-13), 2.04 (2H, m, H-4 and H-9), 1.99 (1H, m, H-5), 1.98 (3H, s, H-19), 1.89 (1H, dd,  $J$  14.1, 10.0, H-9'), 1.86 (3H, s, H-20), 1.47 (1H, m, H-2'), 1.24 (3H, s, H-14), 1.14 (3H, d,  $J$  6.9, H-15), 0.91 (4H, m, H-23), 0.03 (9H, s,  $\text{Si}(\text{CH}_3)_3$ );  $\delta_{\text{C}}$  (150 MHz;  $\text{CDCl}_3$ ) 168.8 (C-12), 168.0 (C-16), 146.3 (C-7), 138.0 (C-18), 127.8 (C-17), 115.1 (C-11), 91.6 (C-21), 78.9 (C-3), 78.1 (C-10), 72.6 (C-6), 71.3 (C-8), 65.2 (C-22), 48.8 (C-5), 42.9 (C-1), 41.2 (C-4), 35.2 (C-2), 31.91 (C-9), 30.2 (C-14), 21.1 (C-13), 20.5 (C-20), 18.1 (C-15 and C-23), 15.7 (C-19), -1.4 ( $\text{Si}(\text{CH}_3)_3$ );  $\nu_{\text{max}}$  (film;  $\text{cm}^{-1}$ ) 2926 (C-H), 2854 (C-H), 1745 (acetate C=O), 1717 (angelate C=O), 1651 (w C=C);  $[\alpha]_{\text{D}}$  -41.7 ( $c$ . 0.06,  $\text{CHCl}_3$ ); found (ESI+)  $[\text{MNa}]^+$  519.2749;  $\text{C}_{26}\text{H}_{44}\text{O}_7\text{Na}$  requires  $M$ , 519.2754.



Standard 1H DRX-600  
sa6054 prep2 fr2

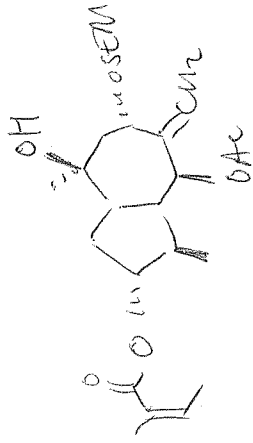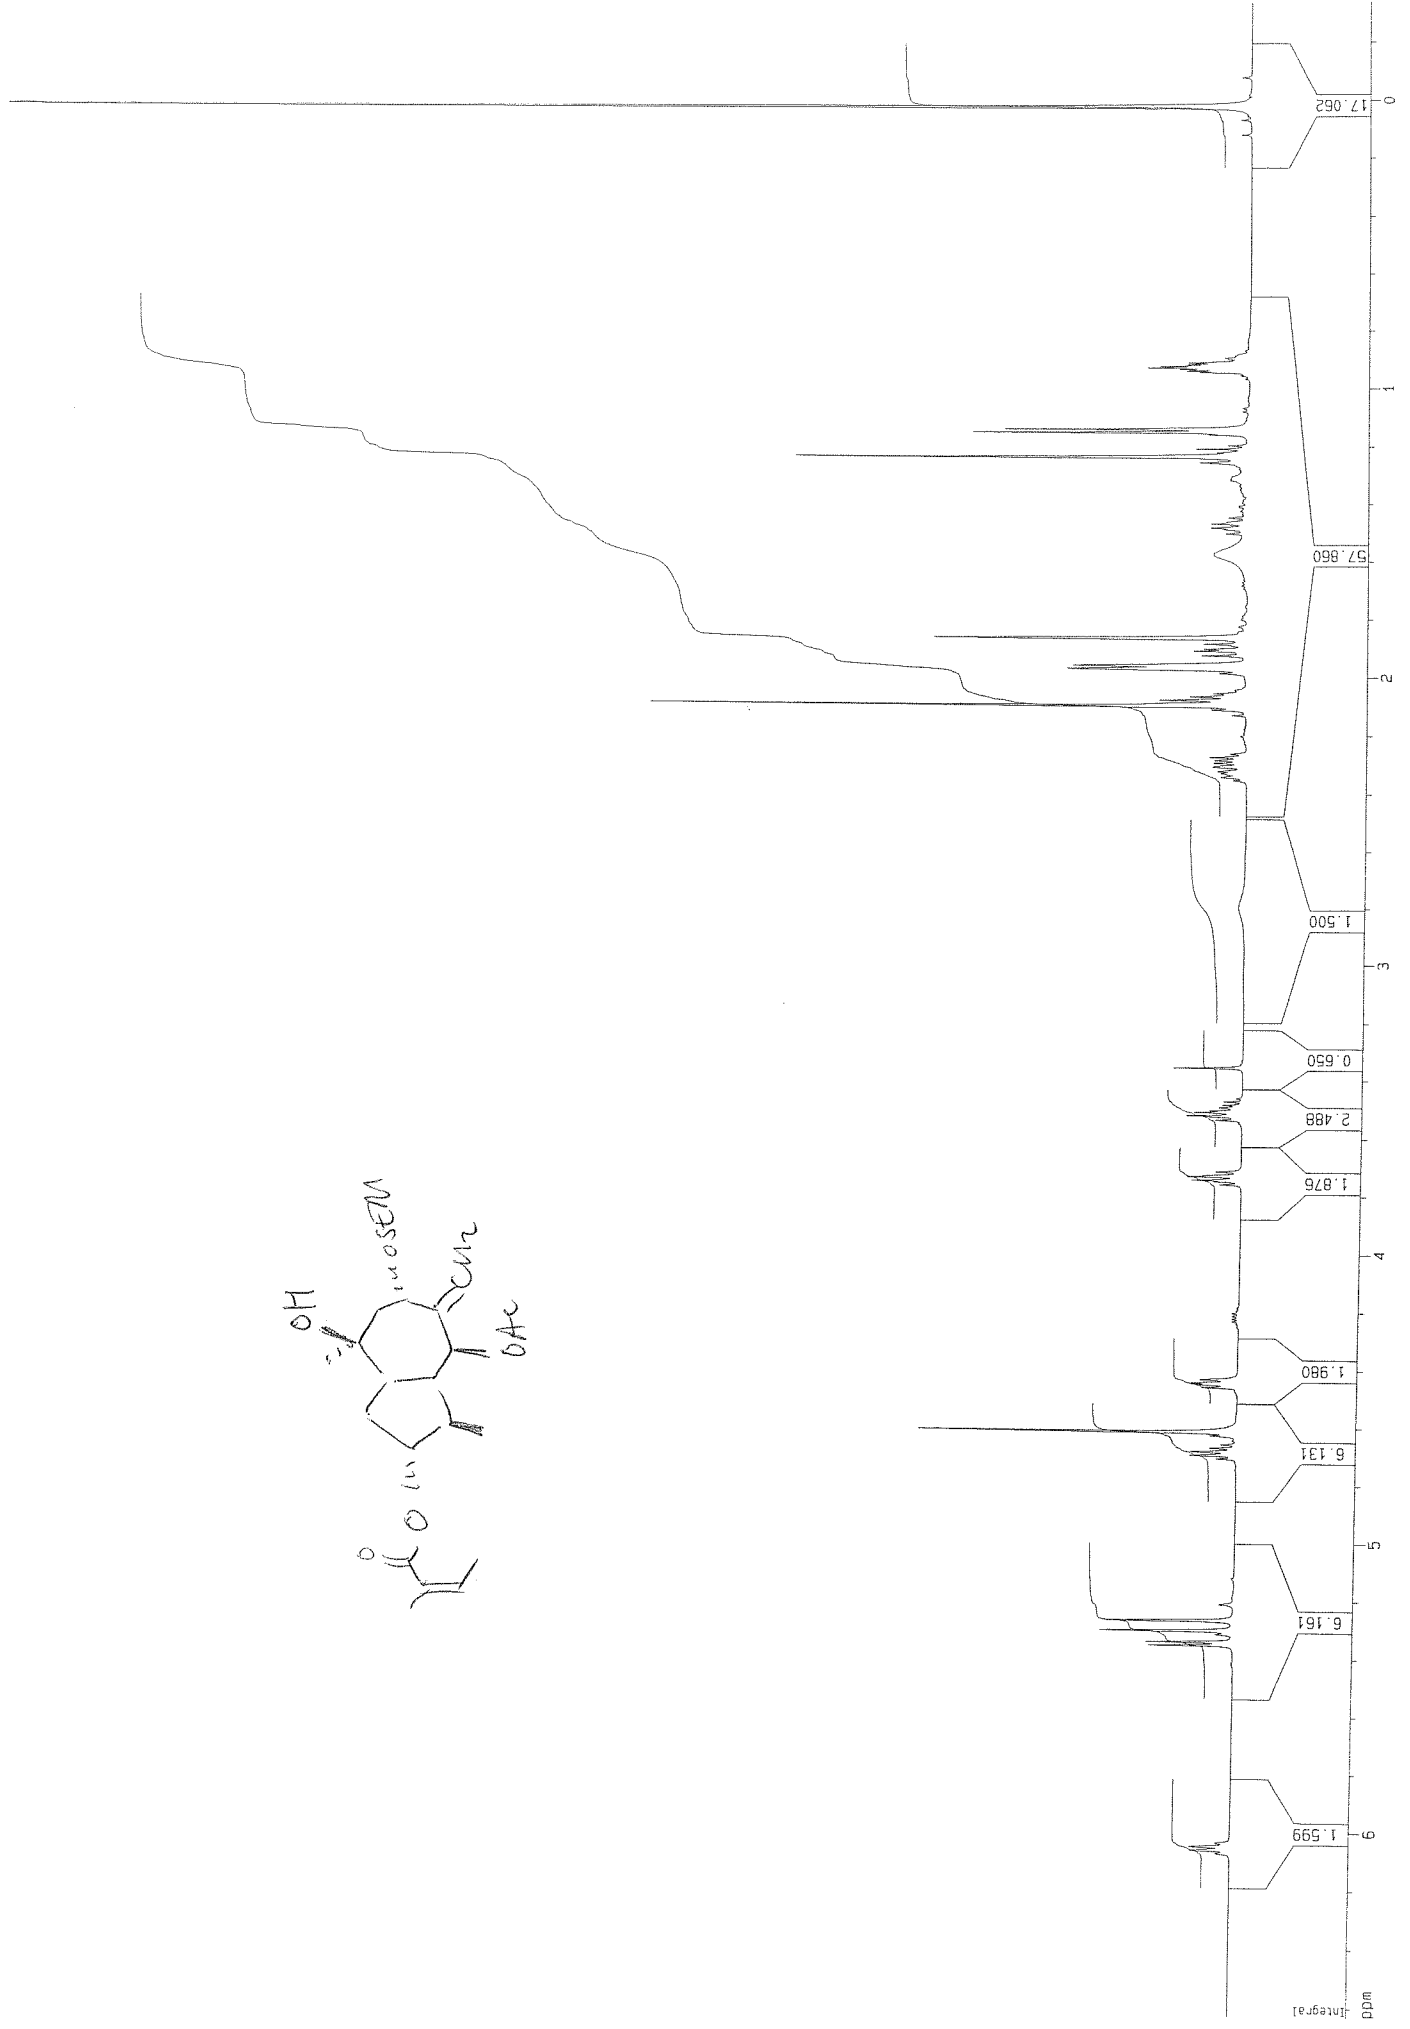

Standard 13C DFX-600  
sab054 prep2 fr2

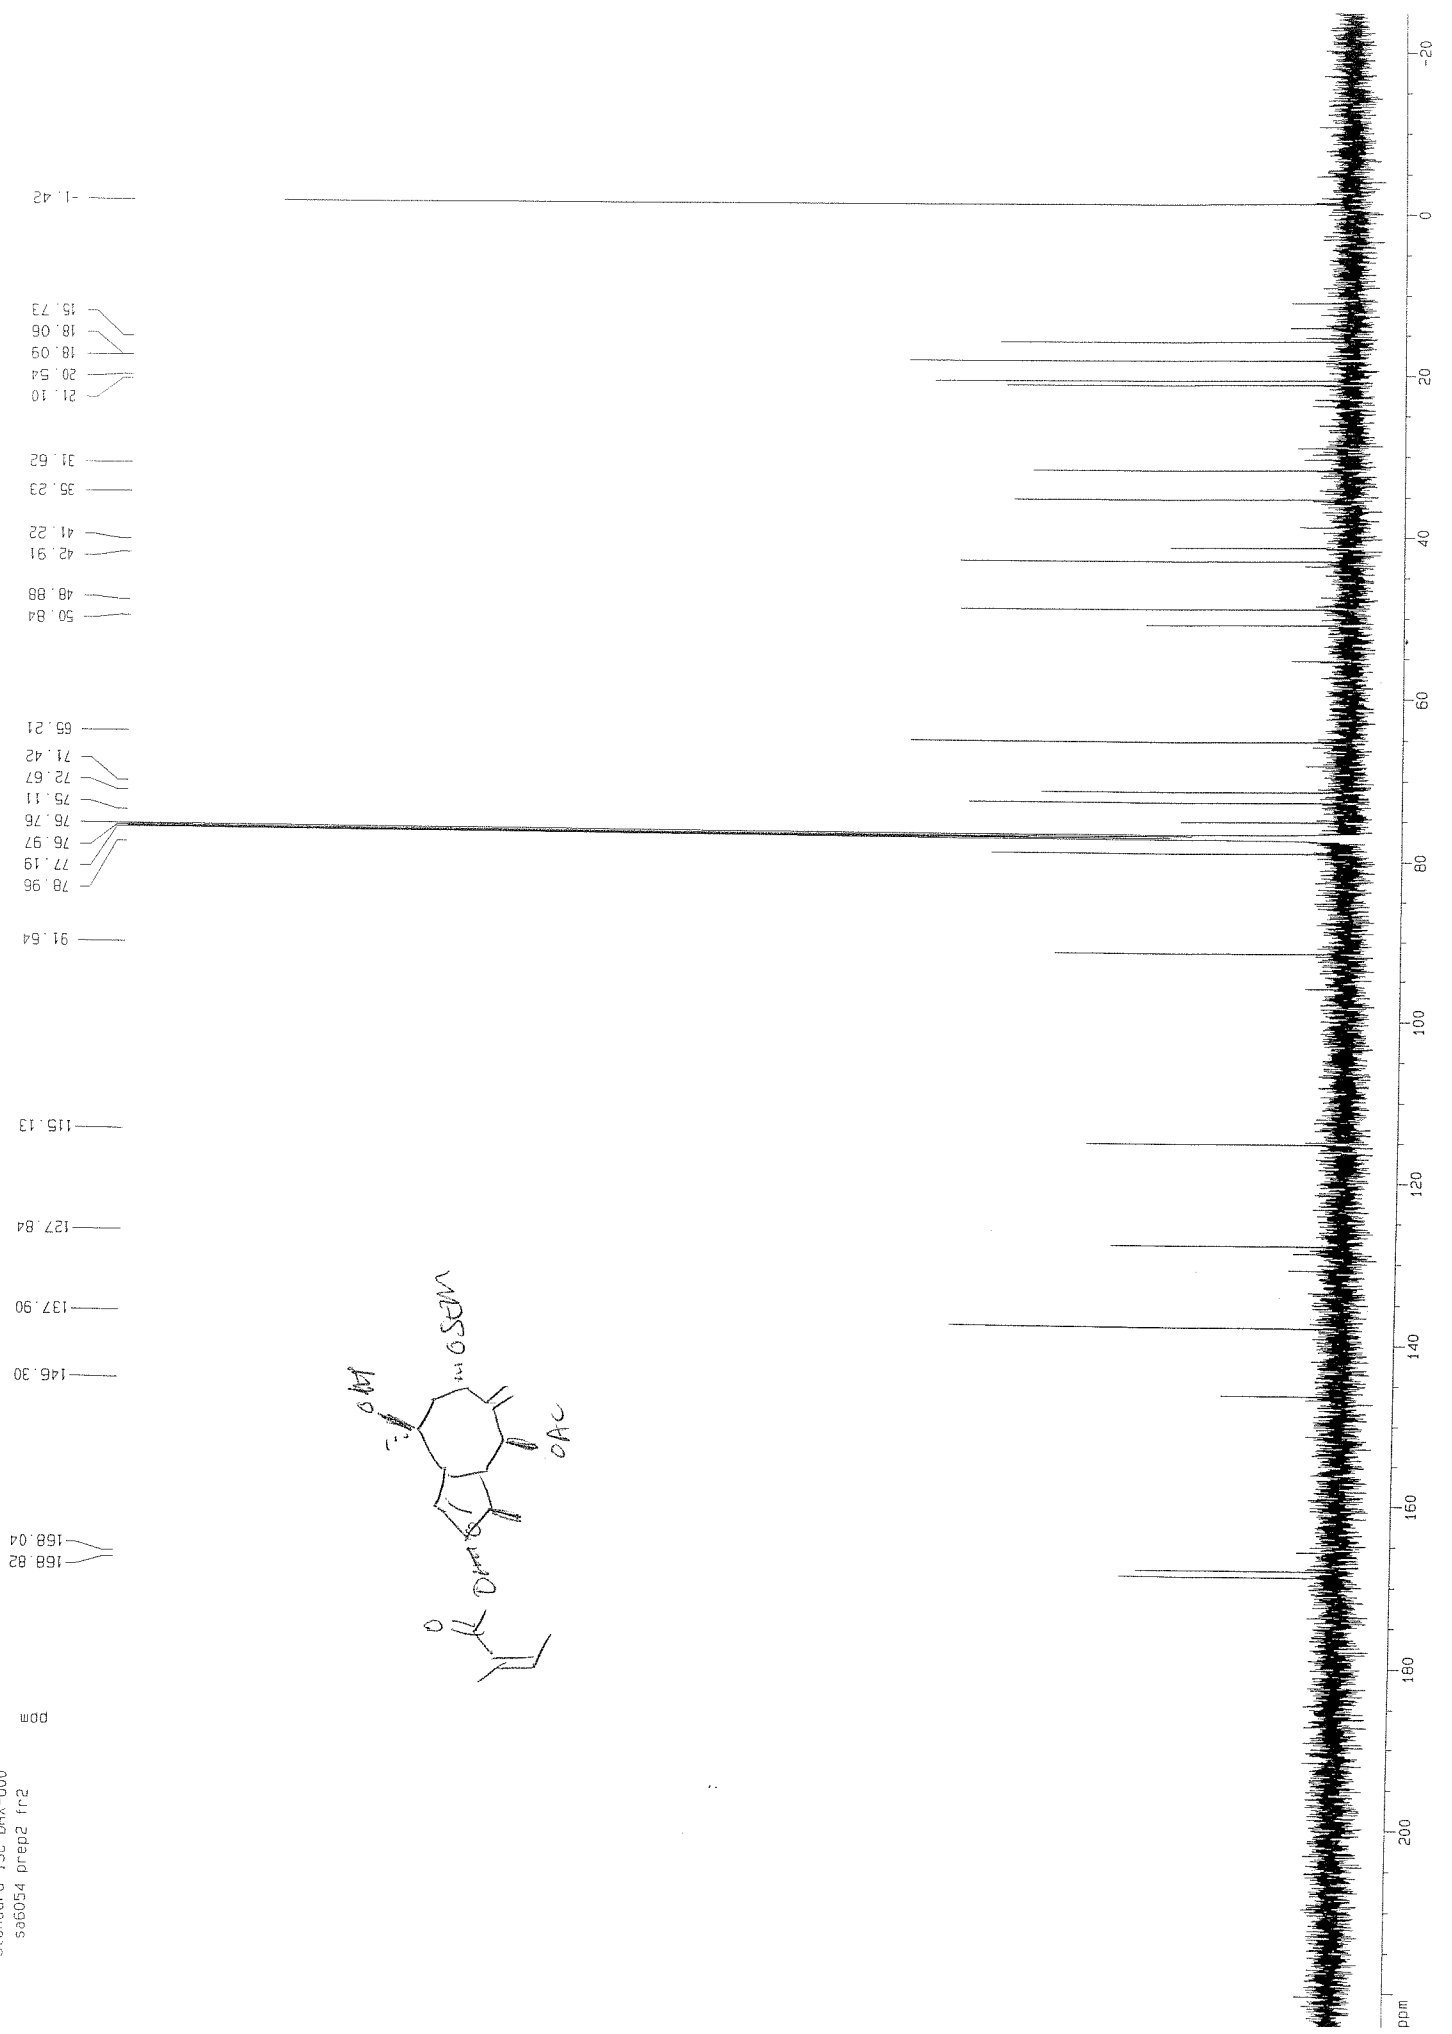

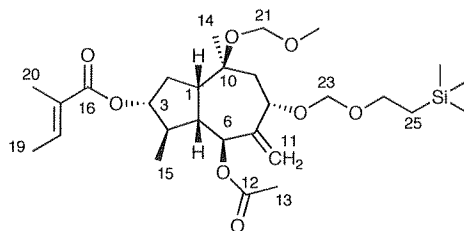

*This compound was formed as an undesired side product during the formation of angelate ester 47.*  $\delta_{\text{H}}$  (600 MHz;  $\text{CDCl}_3$ ) 6.82 (1H, q,  $J$  7.0, H-18), 5.26 (1H, s, H-11), 5.23 (1H, d,  $J$  10.5, H-6), 5.03 (1H, s, H-11'), 4.76 (1H, d,  $J$  7.3, H-21), 4.71 (1H, m, H-3), 4.69 (1H, d,  $J$  7.3, H-23), 4.56 (2H, d,  $J$  7.3, H-21' and H-23'), 4.37 (1H, dd,  $J$  8.4, 7.9, H-8), 3.76 (1H, ddd,  $J$  16.6, 6.8, 6.5, H-24), 3.49 (1H, ddd,  $J$  16.6, 6.9, 6.4, H-24'), 3.34 (3H, s, H-22), 2.46 (1H, ddd,  $J$  13.0, 7.1, 6.6, H-1), 2.28 (1H, ddd,  $J$  13.7, 7.1, 6.8, H-2), 2.15 (2H, m, H-4 and H-9), 2.07 (3H, s, H-13), 1.96 (2H, m, H-5 and H-9'), 1.81 (3H, s, H-20), 1.78 (3H, d,  $J$  7.0, H-19), 1.58 (1H, m, H-2'), 1.27 (3H, s, H-14), 1.13 (3H, d,  $J$  7.2, H-15), 0.94 (2H, m, H-25), 0.03 (9H, s,  $\text{Si}(\text{CH}_3)_3$ );  $\delta_{\text{C}}$  (150 MHz;  $\text{CDCl}_3$ ) 169.5 (C-12), 168.1 (C-16), 146.7 (C-7), 137.5 (C-18), 128.5 (C-17), 113.8 (C-11), 90.8 (C-21), 90.4 (C-23), 79.8 (C-3), 77.9 (C-10), 73.0 (C-6), 72.7 (C-8), 65.8 (C-24), 55.9 (C-22), 52.7 (C-5), 46.6 (C-1), 43.3 (C-4), 38.6 (C-9), 34.6 (C-2), 29.7 (C-14), 21.2 (C-13), 19.3 (C-20), 18.1 and 18.0 (C-15 and C-25), 14.3 (C-19), -1.4 ( $\text{Si}(\text{CH}_3)_3$ );  $\nu_{\text{max}}$  (film;  $\text{cm}^{-1}$ ) 2921 (C-H), 1744 (acetate C=O), 1709 (tiglate C=O);  $[\alpha]_{\text{D}}$  -50.0 ( $c$ . 0.10,  $\text{CHCl}_3$ ); found (ESI+)  $[\text{MNa}]^+$  563.3011;  $\text{C}_{28}\text{H}_{48}\text{O}_8\text{SiNa}$  requires  $M$ , 563.3016.

Standard 1H DRX-600  
 Sabosyl propyl (5S,6S)-3-3)

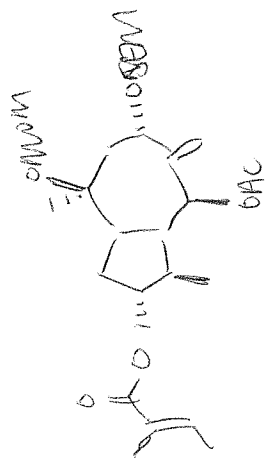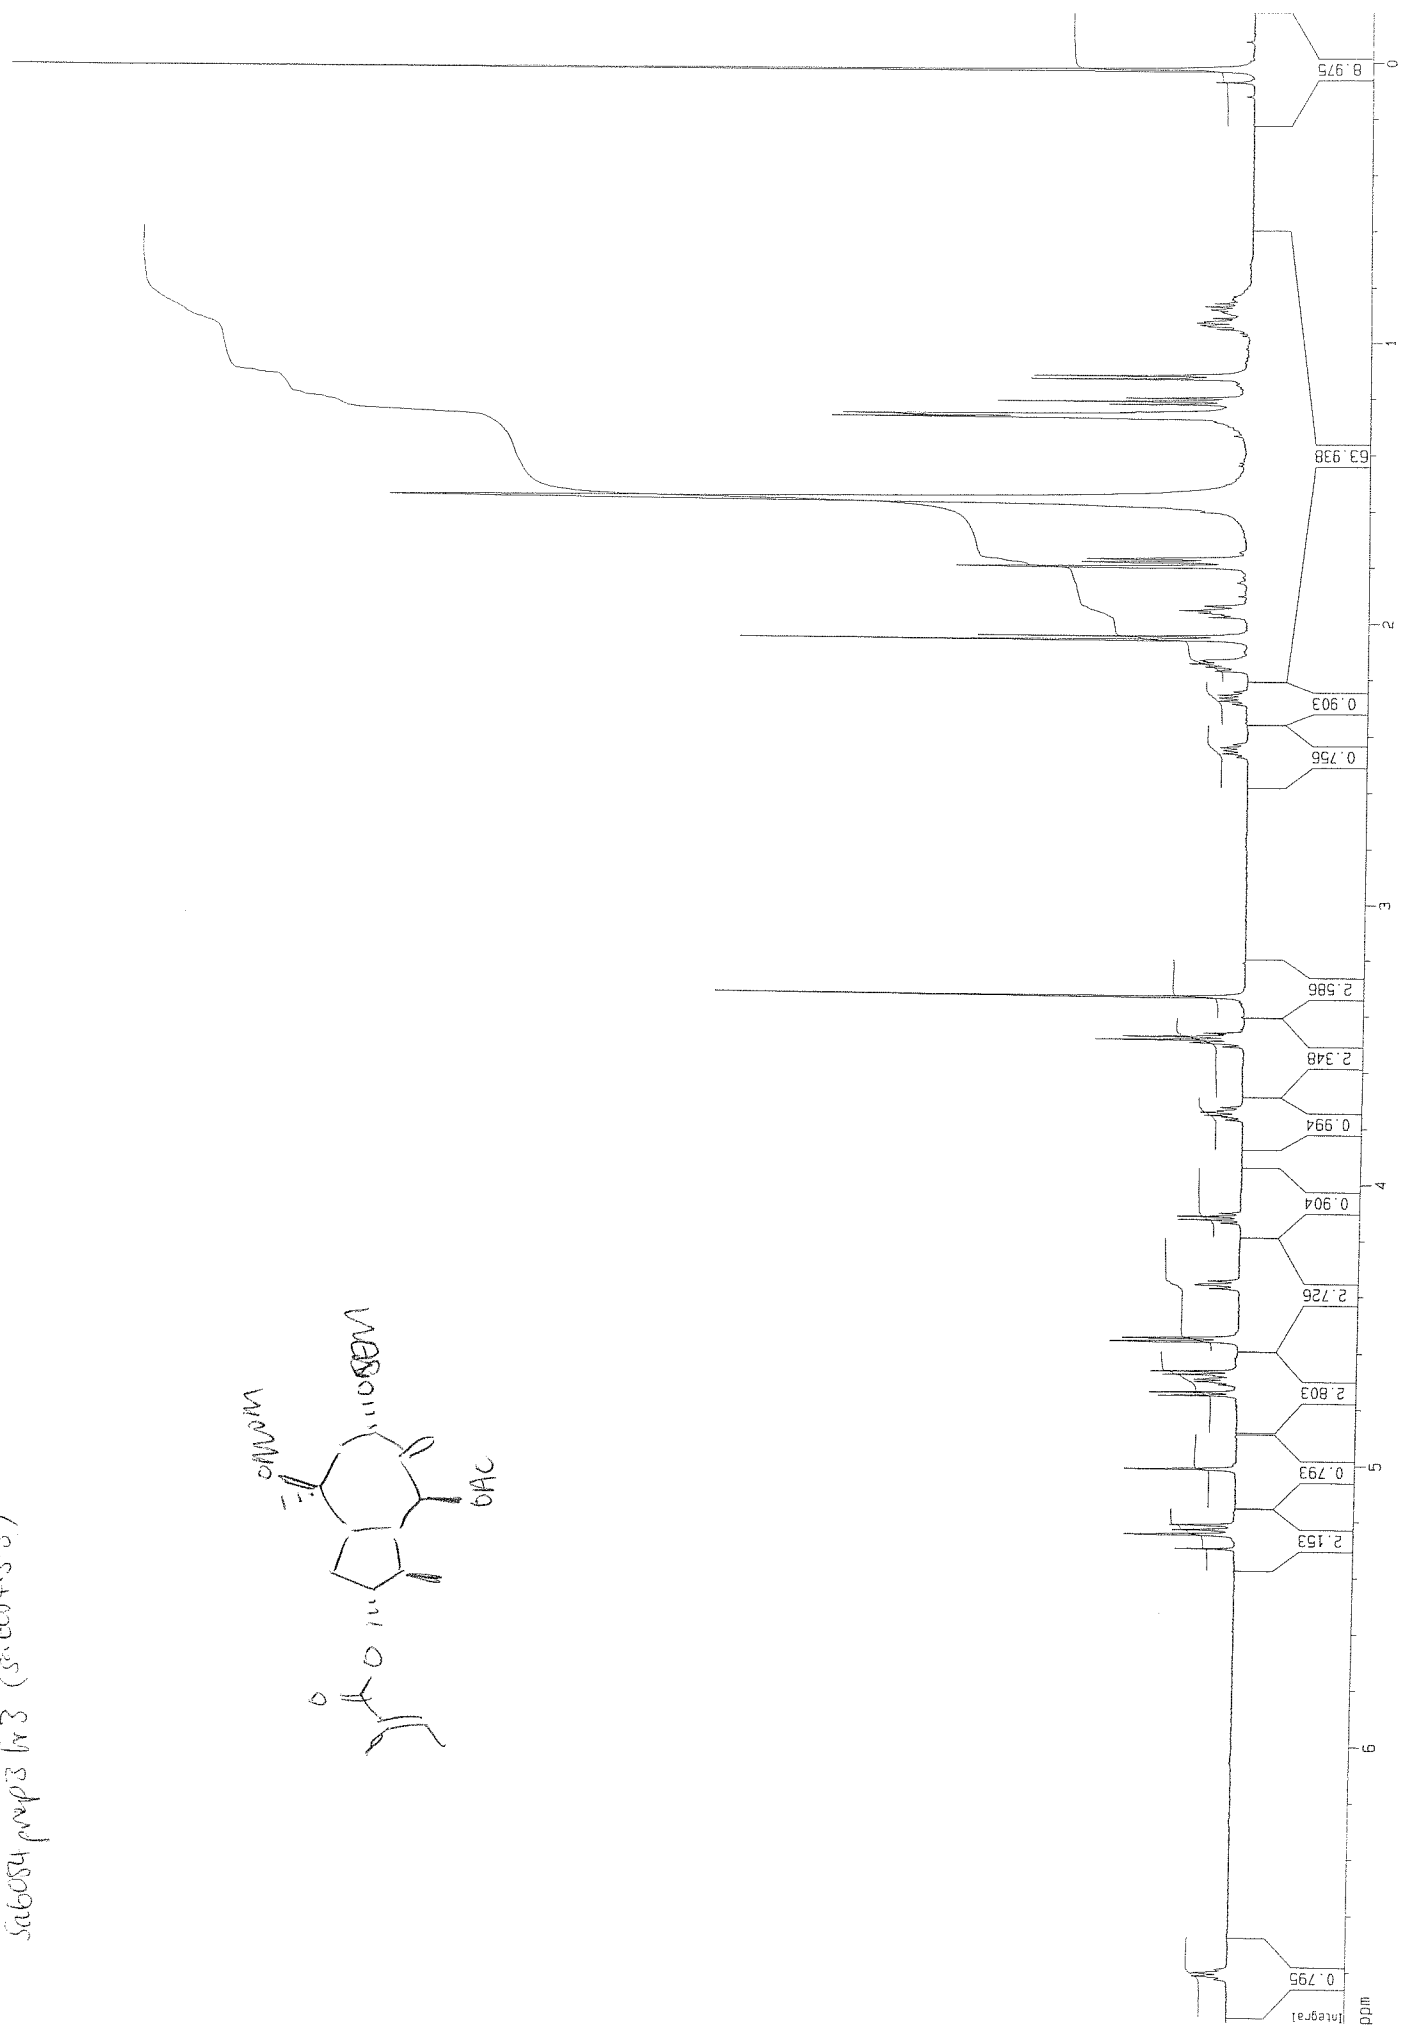

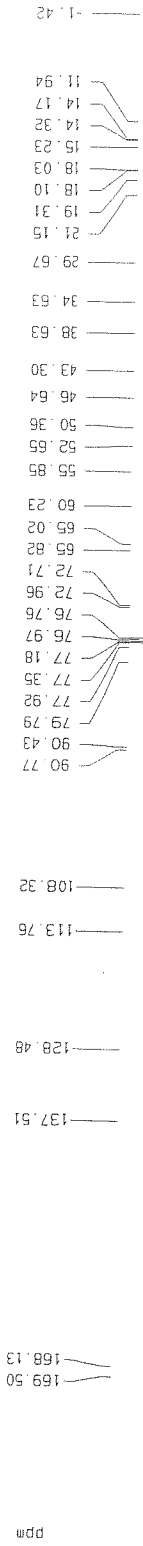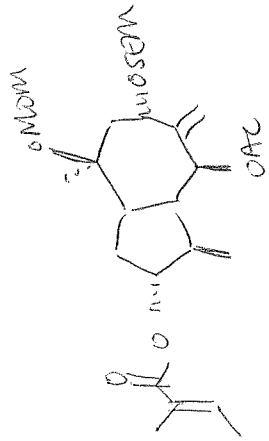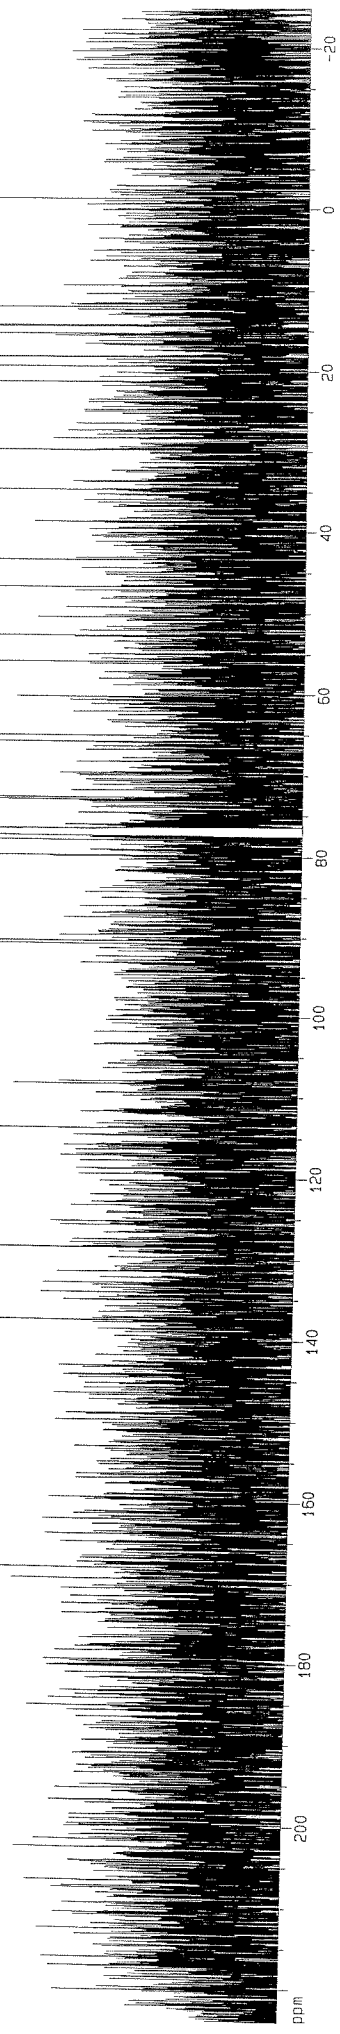

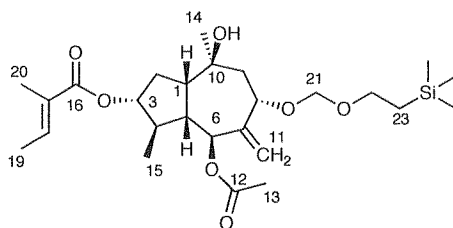

*This compound was formed as an undesired side product during the formation of angelate ester 47.*  $\delta_{\text{H}}$  (600 MHz;  $\text{CDCl}_3$ ) 6.82 (1H, q,  $J$  7.1, H-18), 5.36 (1H, d,  $J$  7.6, H-6), 5.31 (1H, s, H-11), 5.29 (1H, s, H-11'), 4.68 (1H, m, H-3), 4.63 (1H, d,  $J$  7.2, H-21), 4.61 (1H, d,  $J$  7.2, H-21'), 4.45 (1H, dd,  $J$  10.0, 6.5, H-8), 3.76 (1H, ddd,  $J$  16.5, 7.0, 6.7, H-22), 3.53 (1H, ddd,  $J$  16.5, 7.0, 6.8, H-22'), 2.34 (1H, m, H-1), 2.26 (1H, ddd,  $J$  12.8, 6.8, 4.8, H-2), 2.08 (5H, m, H-4, H-9 and H-13), 1.98 (1H, m, H-5), 1.93 (1H, dd, 14.1, 10.0, H-9'), 1.83 (3H, s, H-20), 1.79 (3H, d,  $J$  7.1, H-19), 1.46 (1H, ddd,  $J$  12.4, 12.0, 8.1, H-2'), 1.23 (3H, s, H-14), 1.13 (1H, d,  $J$  6.9, H-15), 0.94 (2H, m, H-23), 0.03 (9H, s,  $\text{Si}(\text{CH}_3)_3$ );  $\delta_{\text{C}}$  (150 MHz;  $\text{CDCl}_3$ ) 168.9 (C-16), 168.1 (C-12), 160.8 (C-7), 137.5 (C-18), 128.5 (C-17), 115.2 (C-11), 100.9 (C-21), 79.16 (C-3), 74.9 (C-6), 72.7 (C-10), 71.5 (C-8), 65.8 (C-22), 51.0 (C-5), 48.9 (C-1), 42.9 (C-4), 41.0 (C-9), 35.2 (C-2), 31.6 (C-14), 21.1 (C-13), 18.1 (C-15 and C-23), 14.3 (C-19), 12.0 (C-20), -1.4 ( $\text{Si}(\text{CH}_3)_3$ );  $\nu_{\text{max}}$  (film;  $\text{cm}^{-1}$ ) 3501 (br OH), 2958 (C-H), 1744 (acetate C=O), 1709 (tiglate C=O), 1649 (w C=C), 836 ( $\text{Si}(\text{CH}_3)_3$ );  $[\alpha]_{\text{D}}$  -90.4 ( $c$ . 0.115,  $\text{CHCl}_3$ ); found (ESI+)  $[\text{MNa}]^+$  519.2765;  $\text{C}_{26}\text{H}_{44}\text{O}_7\text{SiNa}$  requires  $M$ , 519.2754.

Standard 1H DIRX-600  
sa6054 prep 2 fr3

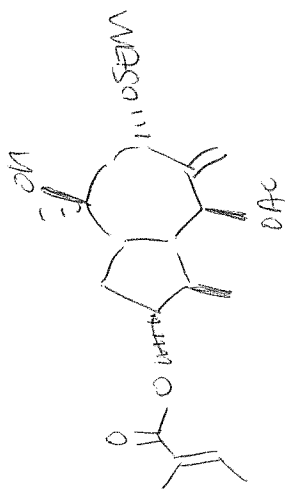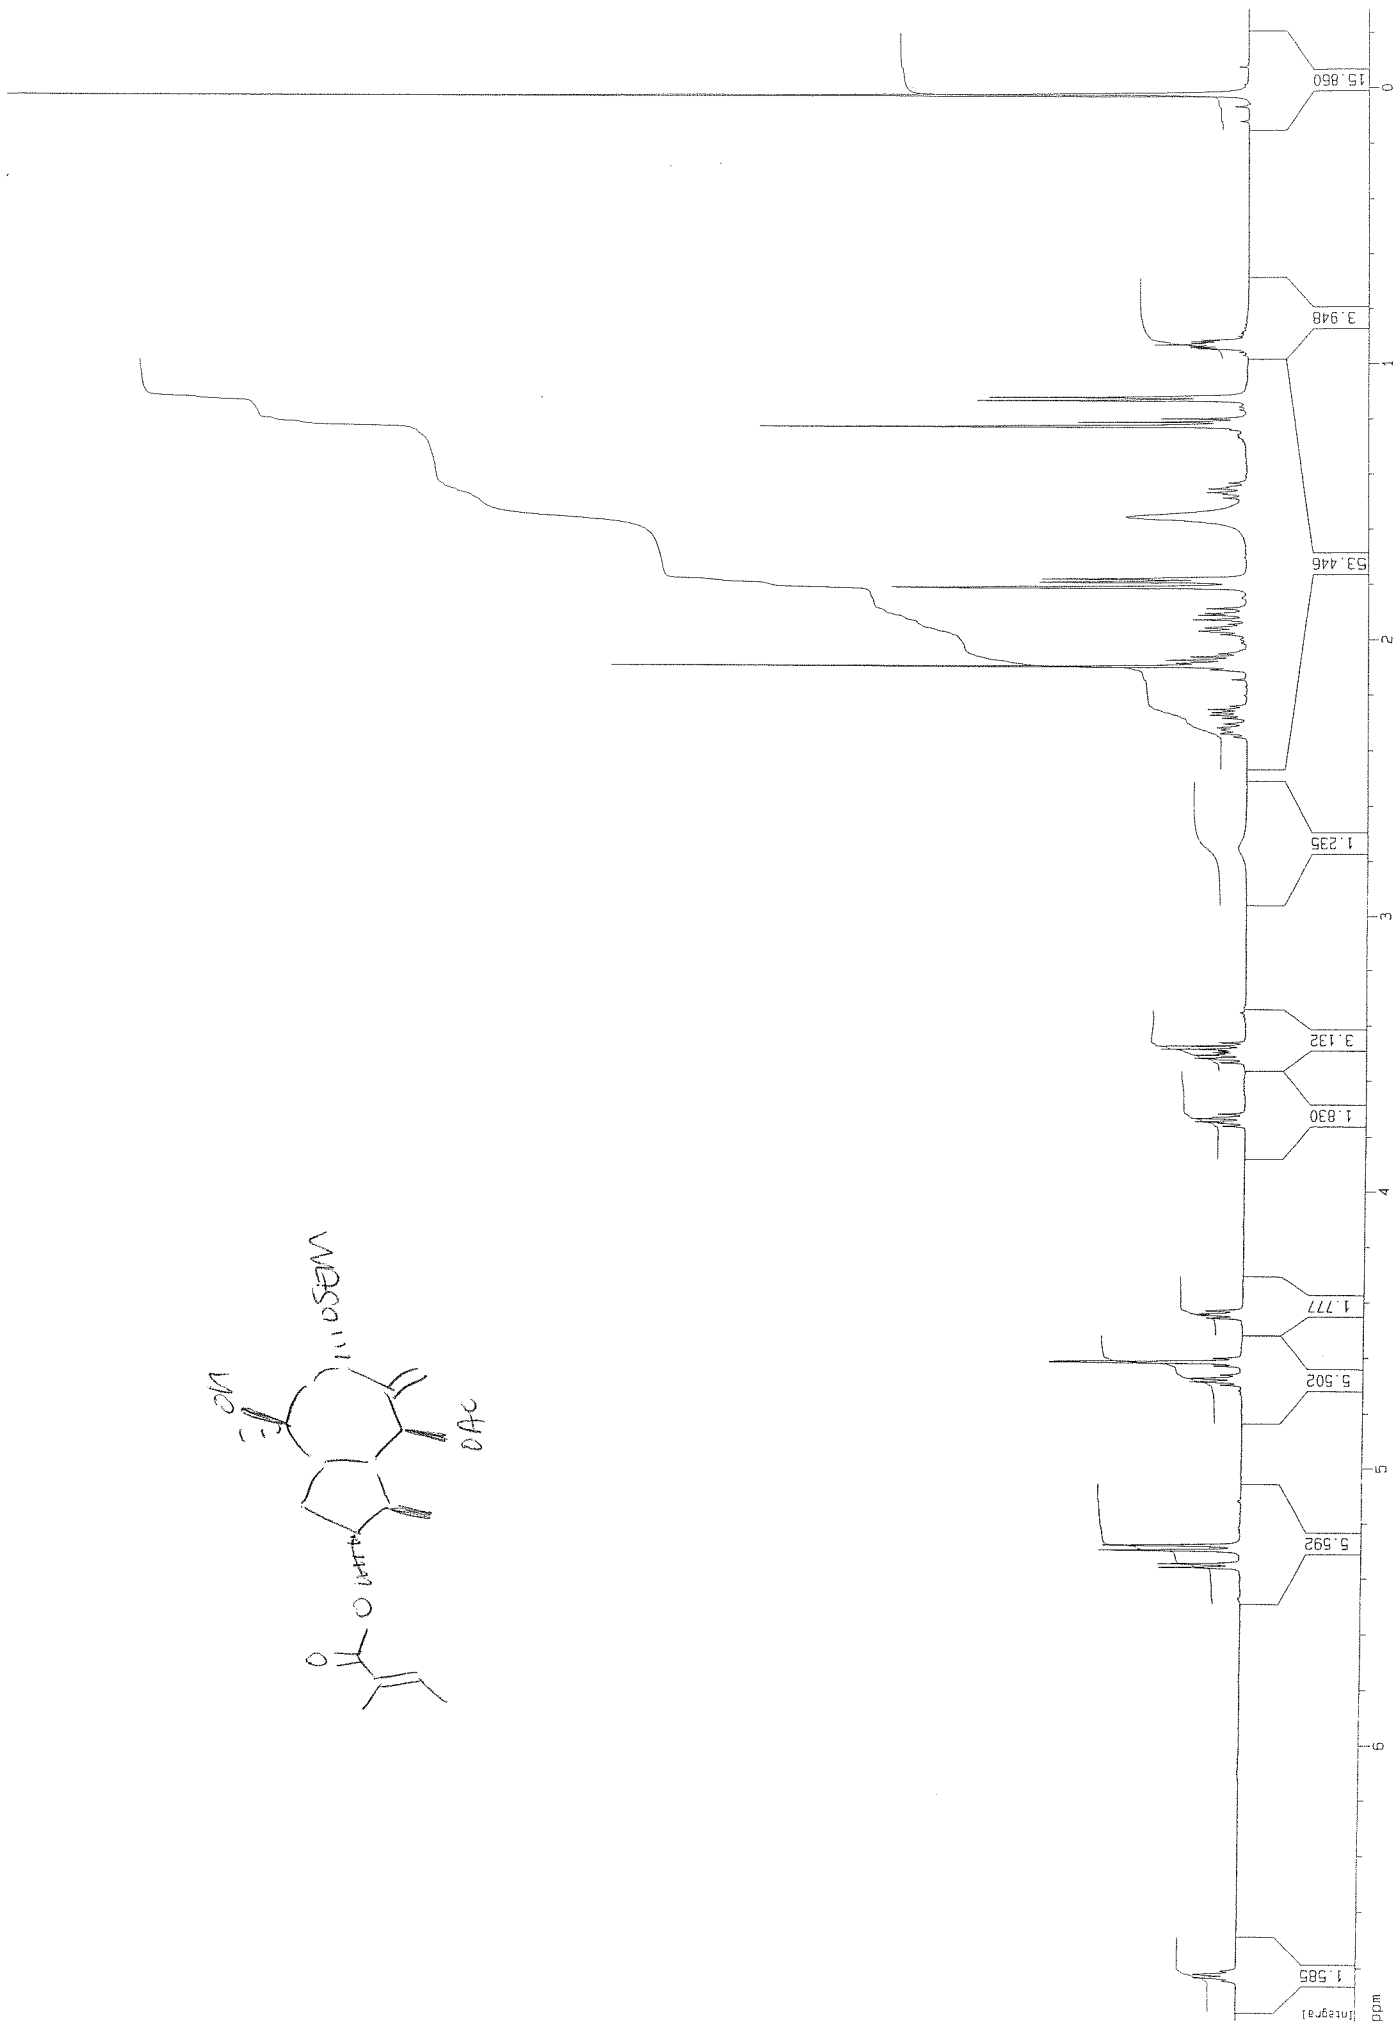

Standard 13C DFX-600  
s05054 prep2 f1-3

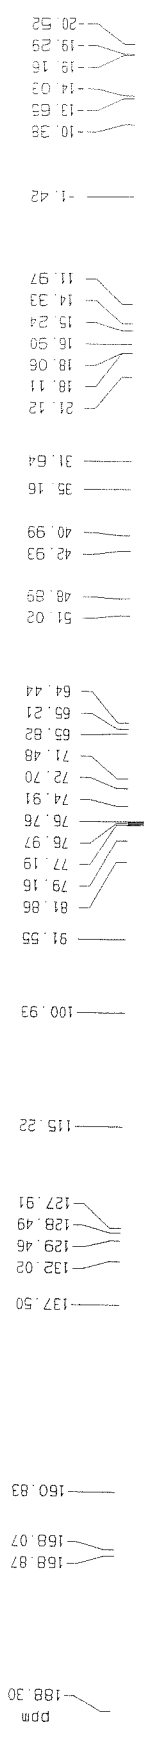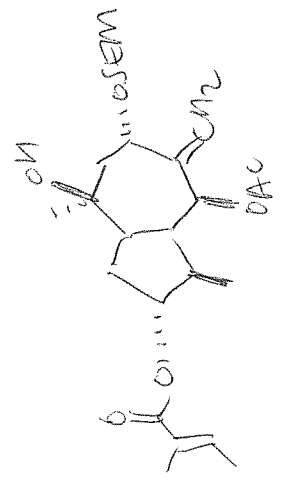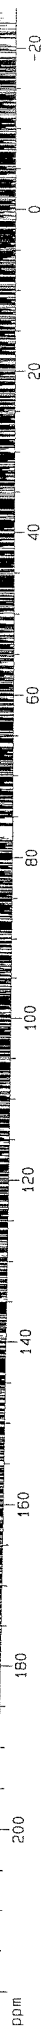



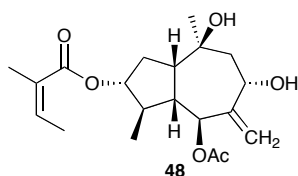

**Diol 48:** A methanolic solution (1.0 mL) of methoxymethyl ether **47** (15.5 mg, 28.7  $\mu\text{mol}$ ) was treated with 2 drops of concentrated HCl at 40 °C for 45 minutes. The mixture was then quenched with sodium bicarbonate solution (20 mL) and extracted with Et<sub>2</sub>O (3  $\times$  20 mL). The combined organic layers were washed with brine (40 mL), dried (MgSO<sub>4</sub>) and evaporated under reduced pressure. The crude gum was purified by column chromatography (SiO<sub>2</sub>, Et<sub>2</sub>O/petrol ether, 4:1 then 9:1) to afford the title compound which was used without further purification;  $\delta_{\text{H}}$  (600 MHz; CDCl<sub>3</sub>) 6.07 (1H, q, *J* 7.1, C=C(H)CH<sub>3</sub>), 5.37 (1H, s, =CH), 5.33 (1H, d, *J* 6.6, H-6), 5.21 (1H, s, =CH'), 4.73 (1H, m, H-3), 4.54 (1H, dd, *J* 9.5, 6.5, H-8), 2.75 (1H, br s, OH), 2.36 (2H, m, H-1 and H-2), 2.17 (2H, m, H-4 and H-9), 2.05 (3H, s, C(O)CH<sub>3</sub>), 2.02 (1H, m, H-5), 1.98 (3H, d, *J* 7.1, C=C(H)CH<sub>3</sub>), 1.89 (1H, dd, *J* 14.3, 9.5, H-9'), 1.87 (3H, s, C(O)CCH<sub>3</sub>), 1.45 (1H, m, H-2'), 1.44 (3H, s, H-14), 1.15 (3H, d, *J* 6.9, H-15) (one OH signal not observed);  $\delta_{\text{C}}$  (125 MHz; CDCl<sub>3</sub>) 169.6 (C(O)CH<sub>3</sub>), 167.9 (C(O)CCH<sub>3</sub>), 143.0 (C-7), 138.1 (C=C(H)CH<sub>3</sub>), 127.1 (C=C(H)CH<sub>3</sub>), 113.6 (=CH<sub>2</sub>), 84.1 (C-10), 79.0 (C-3), 72.8 (C-6), 69.0 (C-8), 50.7 (C-5), 48.9 (C-1), 42.6 and 42.5 (C-4 and C-9), 35.2 (C-2), 29.3 (C-14), 21.8 (C(O)CH<sub>3</sub>), 21.2 (C(O)CCH<sub>3</sub>), 17.9 (C-15), 15.8 (C=C(H)CH<sub>3</sub>); found (ESI+) [MNa]<sup>+</sup> 389.1923; C<sub>20</sub>H<sub>30</sub>O<sub>6</sub>Na requires *M*, 389.1940.

Standard 1H DRX-500  
sa605B

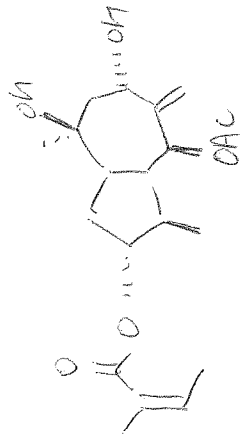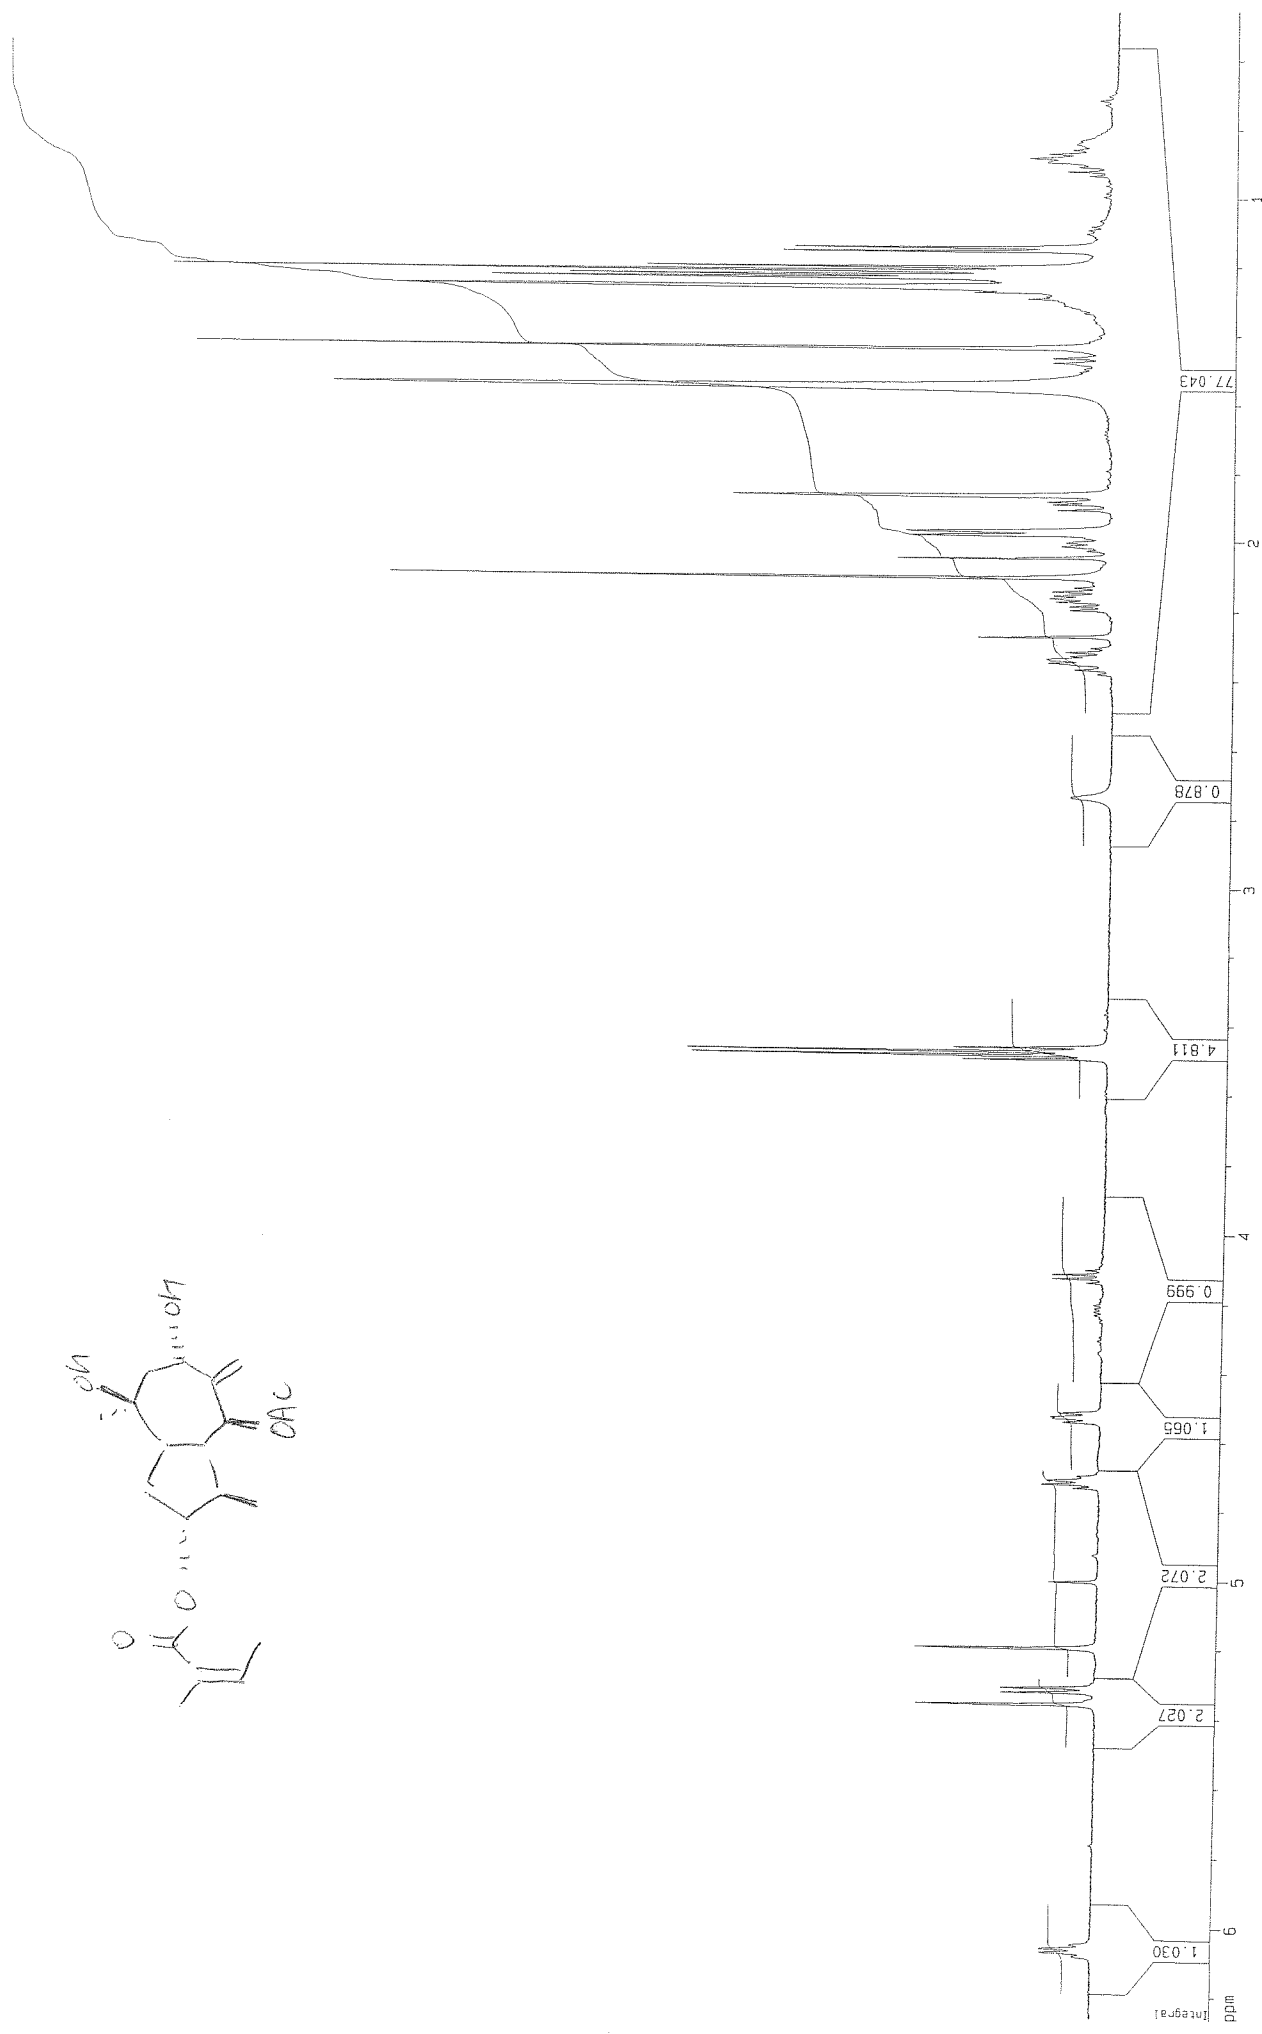

Avance 500 13C Cryo  
~~54068~~ 546058  
 S. Andrews -- SVL

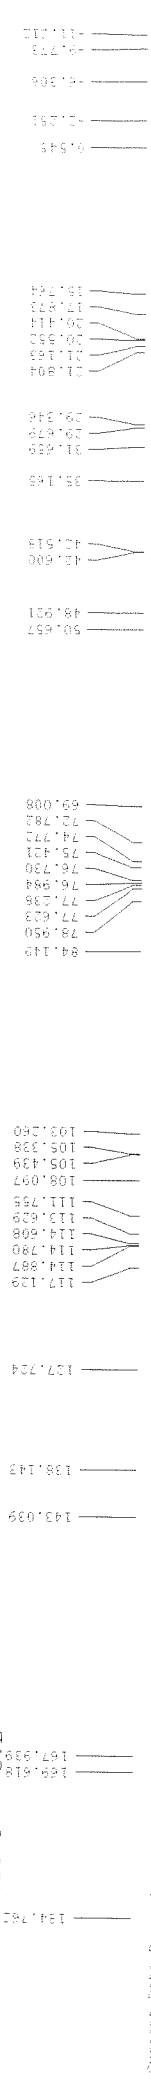

```

Current Data Parameters
NAME          svl-s46058
EXPNO        11
PROCNO       1
PROGNO       1
PULPROG      zgpg30
TD           65536
SOLVENT      CDCl3
NS           600
DS           8
SWH          34013.605 Hz
FIDRES      0.519006 Hz
AQ          0.9634439 sec
RG          4096
DW          14.700 usec
DE          6.00 usec
TE          300.0 K
D1          3.00000000 sec
d11         0.03000000 sec
DELTA      2.50000010 sec
TDO         1
===== CHANNEL f1 =====
NUC1         13C
P1           9.10 usec
PL1         -6.00 dB
SFO1        125.7620628 MHz
===== CHANNEL f2 =====
CPCPPRG2    waltz16
NUC2         1H
PCPD2       100.00 usec
PL2         -6.00 dB
PL12        12.00 dB
PL13        120.00 dB
SFO2        500.0517480 MHz
F2 - Processing parameters
SI          65536
SF          125.7376786 MHz
WDW         EM
SSB         0
LB          1.00 Hz
GB          0
PC          1.00
  
```

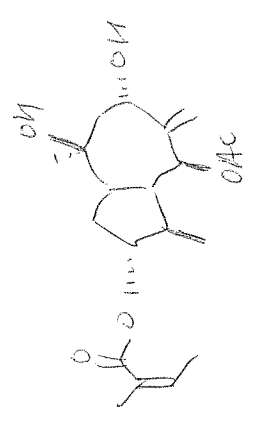

190 180 170 160 150 140 130 120 110 100 90 80 70 60 50 40 30 20 10 0 ppm

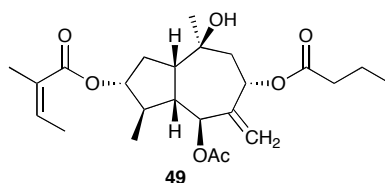

**Butyrate 49:** Butyric anhydride (50  $\mu\text{L}$ , 306  $\mu\text{mol}$ ) and catalytic DMAP were added to a solution of diol **48** (assume 28.7  $\mu\text{mol}$ ) in  $\text{CH}_2\text{Cl}_2$  (1.0 mL). The mixture was stirred at room temperature for 1 hour, quenched with saturated sodium bicarbonate solution (20 mL) and extracted with  $\text{Et}_2\text{O}$  ( $3 \times 20$  mL). The combined extracts were then washed with saturated ammonium chloride solution (40 mL), dried ( $\text{MgSO}_4$ ) and evaporated under reduced pressure. The crude gum was purified by column chromatography ( $\text{SiO}_2$ ,  $\text{Et}_2\text{O}$ /petrol ether, 2:3 then 3:2) to afford the title compound as a colourless oil, used without further purification;  $\delta_{\text{H}}$  (600 MHz;  $\text{CDCl}_3$ ) 6.08 (1H, q,  $J$  7.1,  $\text{C}=\text{C}(\underline{\text{H}})\text{CH}_3$ ), 5.68 (1H, dd,  $J$  10.8, 5.8, H-8), 5.44 (1H, d,  $J$  5.4, H-6), 5.32 (1H, s,  $=\text{CH}$ ), 5.18 (1H, s,  $=\text{CH}'$ ), 4.69 (1H, dd,  $J$  5.2, 7.2, H-3), 3.06 (1H, br s, OH), 2.40 (1H, m, H-1), 2.33 (2H, t,  $J$  7.4,  $\underline{\text{C}}\text{H}_2\text{CH}_2\text{CH}_3$ ), 2.30 (1H, dd,  $J$  12.5, 6.6, H-2), 2.13 (3H, s,  $\text{C}(\text{O})\text{CH}_3$ ), 2.05 (3H, m, H-4, H-5 and H-9), 2.00 (3H, d,  $J$  7.1,  $\text{C}=\text{C}(\text{H})\underline{\text{C}}\text{H}_3$ ), 1.97 (1H, dd,  $J$  13.8, 10.8, H-9'), 1.89 (3H, s,  $\text{C}(\text{O})\text{CCH}_3$ ), 1.68 (2H, tq,  $J$  7.4, 7.4,  $\text{CH}_2\underline{\text{C}}\text{H}_2\text{CH}_3$ ), 1.42 (1H, ddd,  $J$  12.5, 12.5, 8.9, H-2'), 1.24 (3H, s, H-14), 1.14 (3H, d,  $J$  7.1, H-15), 0.96 (3H, t,  $J$  7.4,  $\text{CH}_2\text{CH}_2\underline{\text{C}}\text{H}_3$ );  $\delta_{\text{C}}$  (150 MHz;  $\text{CDCl}_3$ ) 172.2 ( $\underline{\text{C}}(\text{O})\text{CH}_2$ ), 168.6 ( $\underline{\text{C}}(\text{O})\text{CH}_3$ ), 168.0 ( $\underline{\text{C}}(\text{O})\text{CCH}_3$ ), 144.7 (C-7), 138.0 ( $\text{C}=\underline{\text{C}}(\text{H})\text{CH}_3$ ), 127.8 ( $\underline{\text{C}}=\text{C}(\text{H})\text{CH}_3$ ), 114.8 ( $=\text{CH}_2$ ), 78.6 (C-3), 75.7 (C-6), 72.6 (C-10), 69.3 (C-8), 49.8 (C-5), 48.6 (C-1), 42.7 (C-4), 40.8 (C-9), 36.4 ( $\underline{\text{C}}\text{H}_2\text{CH}_2\text{CH}_3$ ), 35.3 (C-2), 31.5 (C-14), 21.1 ( $\text{C}(\text{O})\underline{\text{C}}\text{H}_3$ ), 20.6 ( $\text{C}(\text{O})\underline{\text{C}}\text{H}_3$ ), 18.3 ( $\text{CH}_2\underline{\text{C}}\text{H}_2\text{CH}_3$ ), 17.5 (C-15), 15.8 ( $\text{C}=\text{C}(\text{H})\underline{\text{C}}\text{H}_3$ ), 13.7 ( $\text{CH}_2\text{CH}_2\underline{\text{C}}\text{H}_3$ );  $\nu_{\text{max}}$  (film;  $\text{cm}^{-1}$ ) 3530 (br OH), 2967 (C-H), 1743 (acetate C=O), 1716 (angelate C=O) 1649 (w C=C);  $[\alpha]_{\text{D}} -59.5$  ( $c$ . 0.205,  $\text{CHCl}_3$ ); found (ESI+)  $[\text{MNa}]^+$  459.2343;  $\text{C}_{24}\text{H}_{36}\text{O}_7\text{Na}$  requires  $M$ , 459.2359.



Standard 13C DFX-600  
s91073

168.02  
168.60  
172.21  
ppm

144.67

137.97

127.84

114.83

78.62  
77.21  
77.00  
76.79  
75.71  
72.55  
69.32

49.79  
48.61

42.69  
40.80

36.35  
35.28  
31.52

21.12  
20.56  
18.31  
17.48  
15.77  
13.69

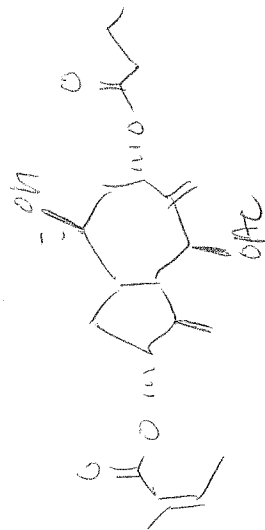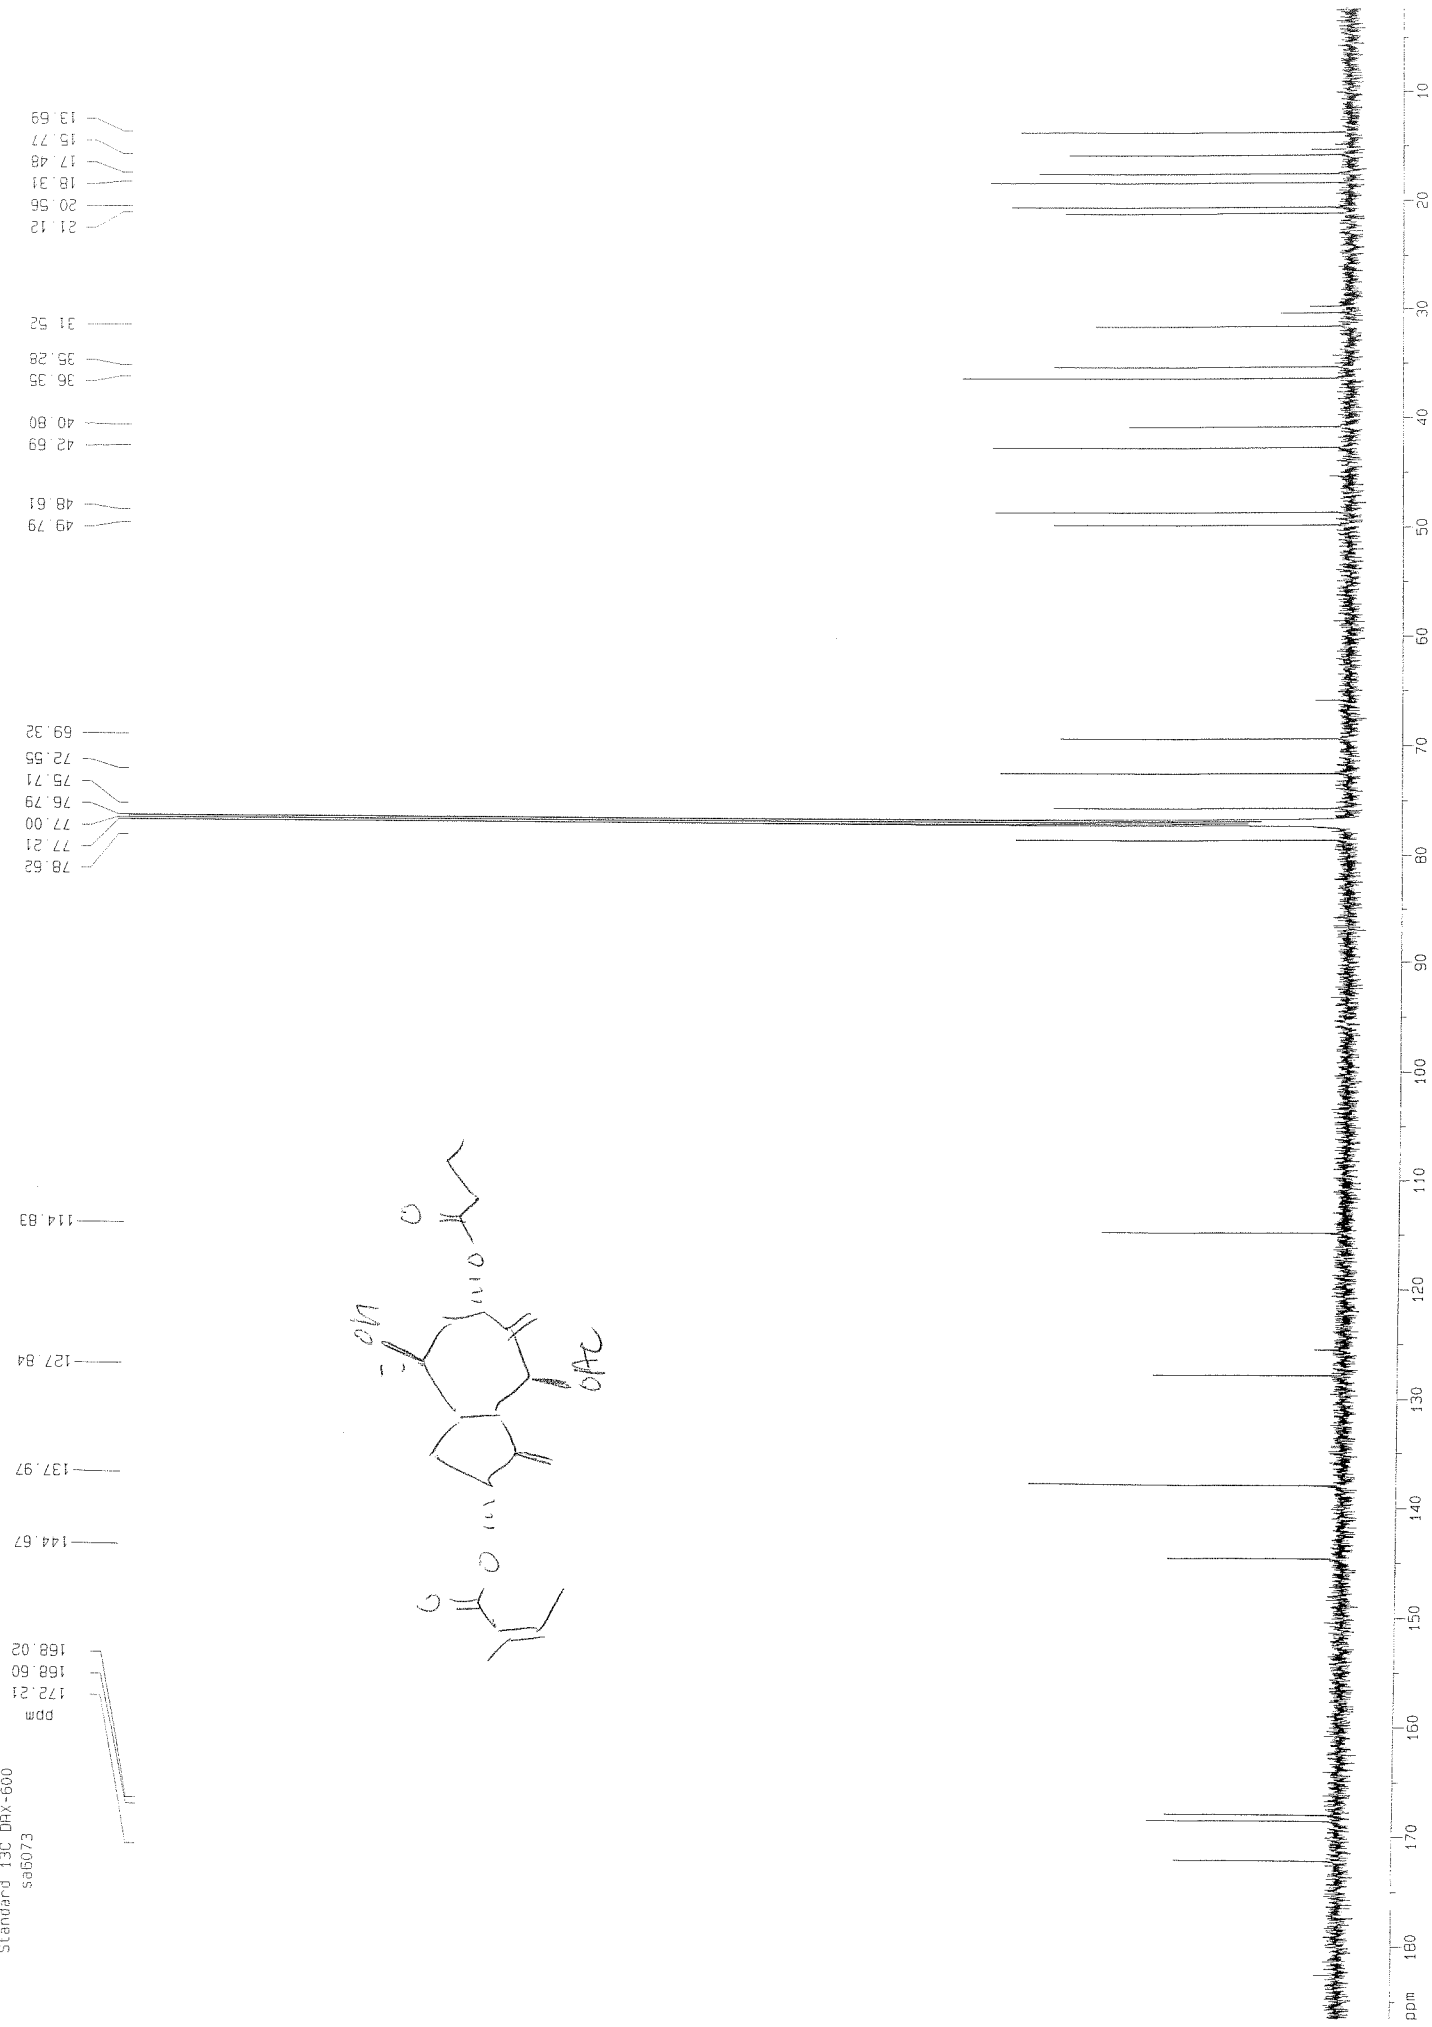

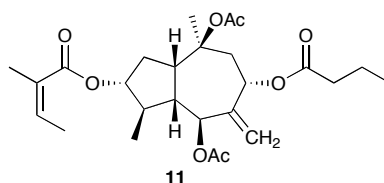

**Olefin 11:** Catalytic *p*-toluenesulfonic acid was added to a solution of tertiary alcohol **49** (assume 28.7  $\mu\text{mol}$ ) and *iso*-propenyl acetate (200  $\mu\text{L}$ , 1.82 mmol) in  $\text{CH}_2\text{Cl}_2$  (500  $\mu\text{L}$ ). The mixture was stirred at room temperature for 18 hours, quenched with aqueous sodium bicarbonate solution (20 mL) and extracted with  $\text{Et}_2\text{O}$  ( $3 \times 20$  mL). The combined organic phases were washed with brine (50 mL), dried ( $\text{MgSO}_4$ ) and concentrated *in vacuo*. Purification by column chromatography ( $\text{SiO}_2$ ,  $\text{Et}_2\text{O}$ /petrol ether, 1:9 to 3:7) afforded the title compound as a colourless gum, 5.5 mg, 42% over 3 steps;  $\delta_{\text{H}}$  (600 MHz;  $\text{CDCl}_3$ ) 6.08 (1H, q,  $J$  7.2,  $\text{C}=\text{C}(\text{H})\text{CH}_3$ ), 5.52 (1H, dd,  $J$  9.4, 7.5, H-8), 5.30 (1H, d,  $J$  9.8, H-6), 5.25 (1H, s,  $=\text{CH}$ ), 5.23 (1H, s,  $=\text{CH}'$ ), 4.75 (1H, m, H-3), 2.89 (1H, ddd,  $J$  14.0, 7.4, 6.6, H-1), 2.65 (1H, dd,  $J$  14.4, 7.5, H-9), 2.38 (1H, ddd,  $J$  13.0, 7.0, 6.6, H-2), 2.30 (2H, t,  $J$  7.4,  $\text{CH}_2\text{CH}_2\text{CH}_3$ ), 2.18 (1H, m, H-4), 2.06 (3H, s, O-6-C(O) $\text{CH}_3$ ), 2.04 (1H, dd,  $J$  14.4, 9.4, H-9'), 2.00 (3H, d,  $J$  7.2,  $\text{C}=\text{C}(\text{H})\text{CH}_3$ ), 1.95 (3H, s, O-10-C(O) $\text{CH}_3$ ), 1.90 (1H, m, H-5), 1.88 (3H, s,  $\text{C}(\text{O})\text{CCH}_3$ ), 1.64 (2H, tq,  $J$  7.4, 7.4,  $\text{CH}_2\text{CH}_2\text{CH}_3$ ), 1.62 (1H, m, H-2'), 1.54 (3H, s, H-14), 1.15 (3H, d,  $J$  7.1, H-15), 0.93 (3H, t,  $J$  7.4,  $\text{CH}_2\text{CH}_2\text{CH}_3$ );  $\delta_{\text{C}}$  (150 MHz;  $\text{CDCl}_3$ ) 172.6 ( $\text{C}(\text{O})\text{CH}_2$ ), 170.1 (O-10-C(O) $\text{CH}_3$ ), 169.3 (O-6-C(O) $\text{CH}_3$ ), 167.9 ( $\text{C}(\text{O})\text{CCH}_3$ ), 146.4 (C-7), 138.2 ( $\text{C}=\text{C}(\text{H})\text{CH}_3$ ), 127.8 ( $\text{C}=\text{C}(\text{H})\text{CH}_3$ ), 115.1 (C-11), 83.0 (C-10), 79.4 (C-3), 73.1 (C-6), 71.1 (C-8), 52.4 (C-5), 45.9 (C-1), 43.5 (C-4), 36.5 (C-9 and  $\text{CH}_2\text{CH}_2\text{CH}_3$ ), 34.1 (C-2), 27.5 (C-14), 22.2 (O-10-C(O) $\text{CH}_3$ ), 21.1 (O-6-C(O) $\text{CH}_3$ ), 20.5 ( $\text{C}(\text{O})\text{CCH}_3$ ), 19.1 (C-15), 18.2 ( $\text{CH}_2\text{CH}_2\text{CH}_3$ ), 15.8 ( $\text{C}(\text{O})\text{CCH}_3$ ), 13.7 ( $\text{CH}_2\text{CH}_2\text{CH}_3$ );  $\nu_{\text{max}}$  (film;  $\text{cm}^{-1}$ ) 2930 (C-H), 1736 (acetate C=O), 1716 (angelate C=O), 1647 (w C=C);  $[\alpha]_{\text{D}} -168$  (c. 0.100,  $\text{CHCl}_3$ ); found (ESI+)  $[\text{MNa}]^+$  501.2479;  $\text{C}_{26}\text{H}_{38}\text{O}_8\text{Na}$  requires  $M$ , 501.2464.

3321.54  
3313.99  
3312.34  
3304.79  
3186.79  
3177.00  
3148.87  
3138.84  
2859.78  
2852.91  
2847.92  
2840.97

2096.58  
2089.51

1746.35  
1739.75  
1733.14  
1599.90  
1592.59  
1585.47  
1578.23  
1408.46  
1390.82  
1383.17  
1380.88  
1375.65  
1373.27  
1365.71  
1236.55  
1228.53  
1204.37  
1200.78  
1199.36  
1193.64  
1192.20  
1170.86  
1135.87  
1134.46  
999.25  
991.78  
984.33  
976.96  
971.28  
950.98  
946.09  
926.52  
864.51  
758.75  
730.04  
700.50  
693.25  
568.38  
560.92  
553.57

Current Data Parameters  
NAME sa6074  
EXPNO 1  
PROCNO 1  
Time 19.09  
Date 20060906  
F2 - Acquisition Parameters

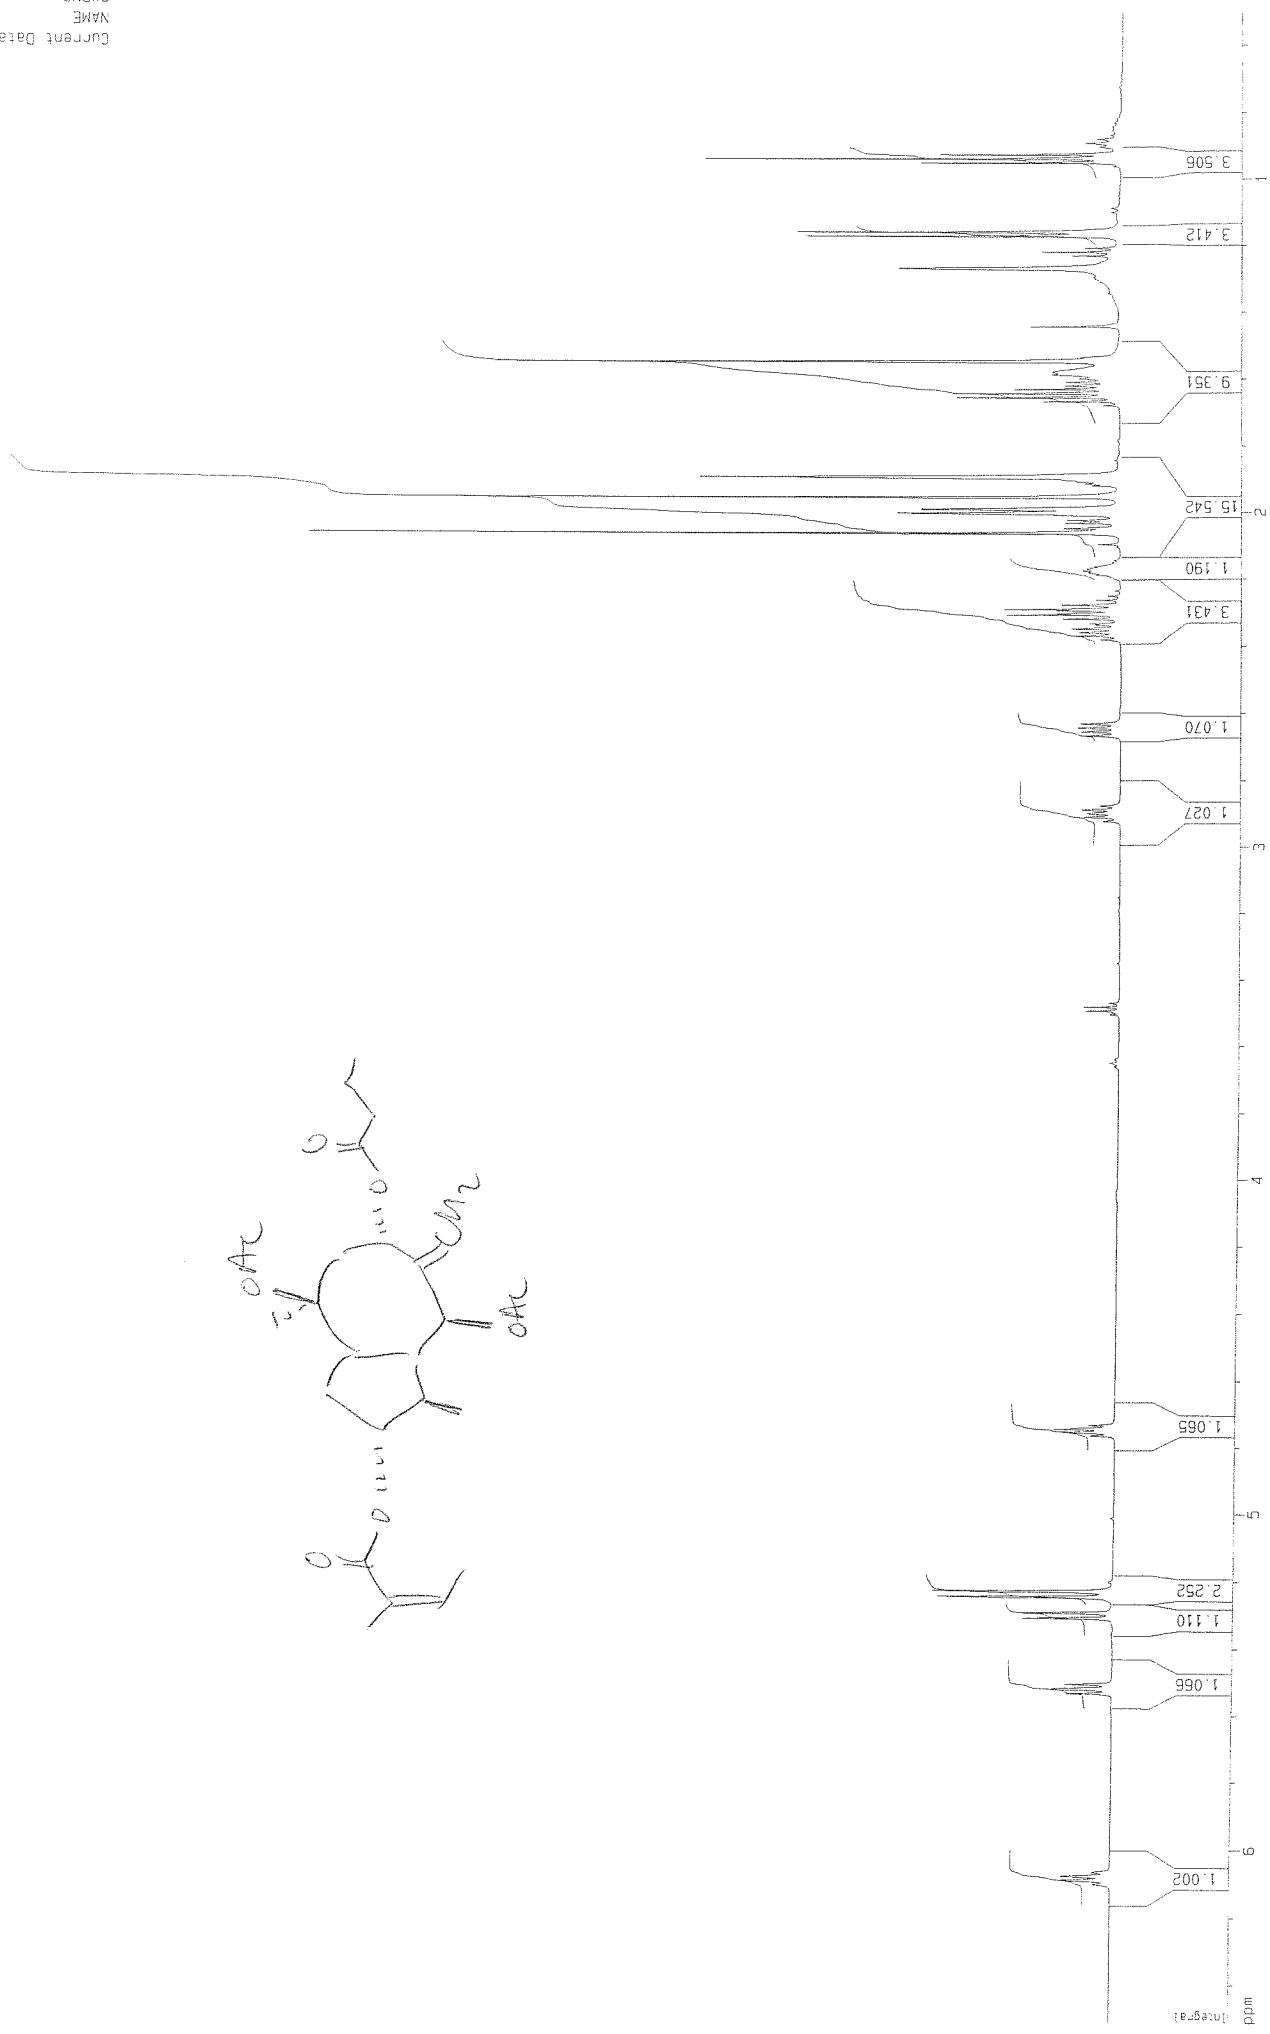



Standard 13C DRX-800

sa9074

ppm

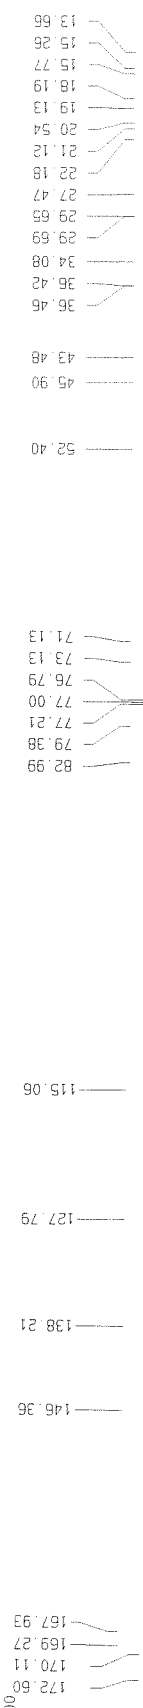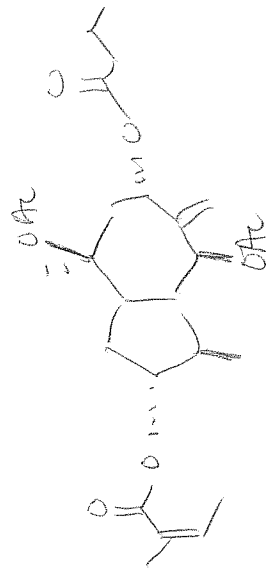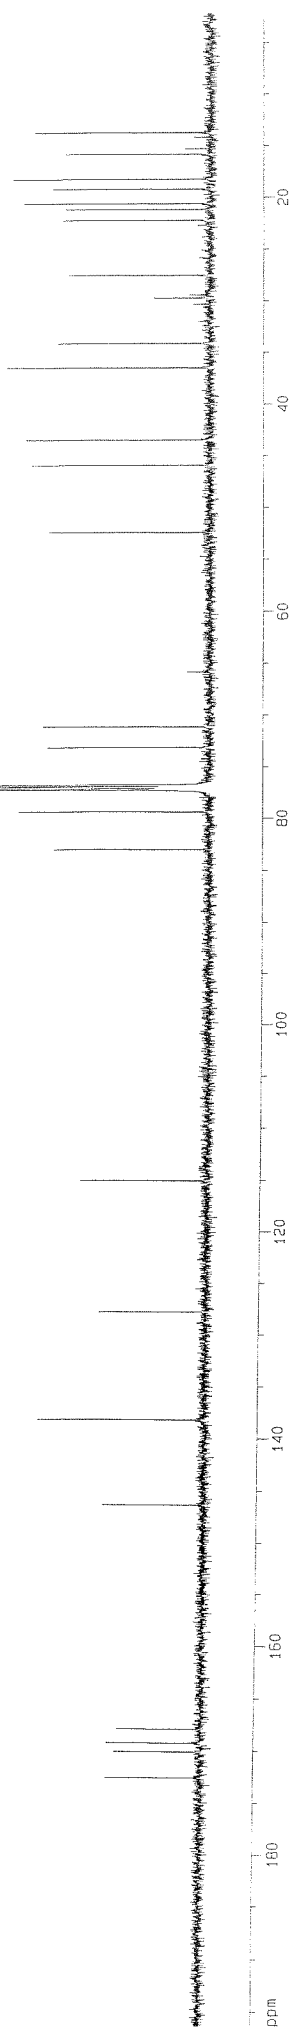

Supplement: b702481a.pdf [file b702481a.pdf]
